# Supplementary material for: FIH Regulates Cellular Metabolism through Hydroxylation of the Deubiquitinase OTUB1
Source: PLoS Biol. 2016 Jan 11;14(1):e1002347. doi: 10.1371/journal.pbio.1002347 (PMC4709136; doi:10.1371/journal.pbio.1002347)
Supplement: S1 Data — (XLSX) [file pbio.1002347.s001.xlsx]

## Sheet: Fig 1B
Fig 1B
	N = 1	N = 2	N = 3	N = 4		Average
Control	1	1	1	1		1
FIH-V5	1.84539	3.36889	2.28969	1.51241		2.25409

## Sheet: Fig 1D
Fig 1D
	N = 1	N = 2	N = 3	N = 4		Average
Control	1	1	1	1		1
FLAG-OTUB1	1.7015	1.55335	3.26216	1.4233		1.98508

## Sheet: Fig 2A
Fig 2A
				Negative Control						FLAG-HA-OTUB1 + FIH-V5						FLAG-HA-OTUB1 + DMOG
Gene names	Protein names	Protein IDs	Majority protein IDs	LFQ intensity NEGATIVE_CONTROL_1	LFQ intensity NEGATIVE_CONTROL_1_COPY	LFQ intensity NEGATIVE_CONTROL_2	LFQ intensity NEGATIVE_CONTROL_2_COPY	LFQ intensity NEGATIVE_CONTROL_3	LFQ intensity NEGATIVE_CONTROL_3_COPY	LFQ intensity OTUB_1	LFQ intensity OTUB_1_COPY	LFQ intensity OTUB_2	LFQ intensity OTUB_2_COPY	LFQ intensity OTUB_3	LFQ intensity OTUB_3_COPY	LFQ intensity DMOG_1	LFQ intensity DMOG_1_COPY	LFQ intensity DMOG_2	LFQ intensity DMOG_2_COPY	LFQ intensity DMOG_3	LFQ intensity DMOG_3_COPY
OTUB1	Ubiquitin thioesterase OTUB1	Q96FW1;F5GYN4;F5H6Q1;F5GYJ8;Q96FW1-2;F5H3F0	Q96FW1;F5GYN4;F5H6Q1;F5GYJ8;Q96FW1-2;F5H3F0	1	1	1	1	1	1	3270000000	3200000000	2750000000	2250000000	3200000000	2060000000	3550000000	2860000000	2040000000	1970000000	3010000000	2950000000
HIF1AN	Hypoxia-inducible factor 1-alpha inhibitor	Q9NWT6;E9PL41;E9PNR8	Q9NWT6	1	1	1	1	1	1	222000000	296000000	150000000	216000000	200000000	281000000	1	4613800	2845600	1	1	1
OTUB1 IP	Average	StDev
Negative Control	1	0
FLAG-HA-OTUB1 + FIH-V5	2.78833e+09	5.27766e+08
FLAG-HA-OTUB1 + DMOG	2730000000	6.11523e+08
	Ttest
FLAG-HA-OTUB1 + FIH-V5 VS. Negative Control	1.43163e-07
FLAG-HA-OTUB1 + DMOG VS. Negative Control	6.96466e-07
FLAG-HA-OTUB1 + FIH-V5 VS. FLAG-HA-OTUB1 + DMOG	0.863126

## Sheet: Fig 2C
Fig 2C
	Normalized hydroxylation levels of N22 in OTUB1
	Ratio mod/unmod 1	Ratio mod/unmod_COPY 1	Ratio mod/unmod 2	Ratio mod/unmod_COPY 2	Ratio mod/unmod 3	Ratio mod/unmod_COPY 3			Average	StDev	Ttest
FLAG-HA-OTUB1 + FIH-V5	68.5206	91.5952	41.8251	52.3452	95.2479	70.8333			70.0612	21.0342	1.01281e-05
FLAG-HA-OTUB1 + DMOG	0	0	0	0	0.36875	0.642187			0.16849	0.274972

## Sheet: Fig 2D
Fig 2D
	Normalized oxidation levels of M31 in OTUB1
	Ratio mod/unmod 1	Ratio mod/unmod_COPY 1	Ratio mod/unmod 2	Ratio mod/unmod_COPY 2	Ratio mod/unmod 3	Ratio mod/unmod_COPY 3			Average	StDev	Ttest
FLAG-HA-OTUB1 + FIH-V5	20.831	12.919	12.082	16.167	6.683	7.8415			12.7539	5.26032	0.875
FLAG-HA-OTUB1 + DMOG	8.5686	6.6185	23.955	9.8863	7.4237	16.675			12.1878	6.79281

## Sheet: Fig 2F
Fig 2F
		Normalized hydroxylation levels of N22 in OTUB1											Statistical Analysis
		Ratio mod/total OTUB1 1	Ratio mod/total OTUB1_COPY 1	Ratio mod/total OTUB1 2	Ratio mod/total OTUB1_COPY 2	Ratio mod/total OTUB1 3	Ratio mod/total OTUB1_COPY 3			Average	StDev		One-Way ANOVA followed by Tukey Test
FLAG-HA-OTUB1 + FIH-V5	Control	0.000160202	0.000107913	0.000152247	0.000104272	0.000154931	0.000144461			0.000137338	2.47569e-05		Software	GraphPad Prism, Version 4.00
	Hypoxia	4.75182e-05	3.39056e-05	4.41933e-05	3.37323e-05	2.07068e-05	3.44149e-05			3.57452e-05	9.43749e-06
	Hypoxia + Re-Oxygenation	6.83604e-05	6.43601e-05	0.000101055	9.08371e-05	7.81563e-05	6.53002e-05			7.80115e-05	1.50771e-05		One-Way ANOVA	P<0.0001
	DMOG	4.43518e-05	6.26776e-05	4.87332e-05	4.70033e-05	3.99107e-05	6.55127e-05			5.13649e-05	1.0339e-05
													Tukey's Multiple Comparison Test	Mean Diff.	q	P value	95% CI of diff
													Control vs Hypoxia	0.0001016	15.46	P < 0.001	0.00007559 to 0.0001276
													Control vs DMOG	8.597e-05	13.08	P < 0.001	0.00005997 to 0.0001120
													Hypoxia vs Hypoxia + Re-Oxygenation	-4.227e-05	6.433	P < 0.01	-0.00006827 to -0.00001626

## Sheet: Fig 3C
Fig 3C
		Normalized hydroxylation levels of N22 in OTUB1
		Ratio mod/unmod 1	Ratio mod/unmod_COPY 1	Ratio mod/unmod 2	Ratio mod/unmod_COPY 2	Ratio mod/unmod 3	Ratio mod/unmod_COPY 3			Average	StDev	Ttest
FLAG-HA-OTUB1	siNT	10.5369	11.5337	4.97758	5.82524	11.8405	10.83			9.25733	3.03516	0.0181991
	siOTUB1		2.75439		6.34307	3.02867	4.94118			4.26683	1.69175

## Sheet: Fig 3D
Fig 3D
						Statistical Analysis
	FIH	Average	StDev			One-Way ANOVA followed by Tukey Test
OTUB1	-	659.833	120.006			Software	GraphPad InStat, Version 3.06, 32 bit for Windows
	+	1767.44	166.942
OTUB1 N22A	-	175.833	57.4551			One-Way ANOVA	p < 0.0001
	+	274.444	96.0939
HIF-1α	-	284.333	146.977			Tukey-Kramer Multiple Comparisons Test
	+	4341.89	915.331			If the value of q is greater than 4.897 then the p value is less than 0.05
mNotch	-	250.5	119.929				q	p value	p value summary
	+	1607.22	243.172			OTUB1 - vs. OTUB1 +	5.459	p < 0.05	*
						OTUB1 + vs. OTUB1 N22A +	7.845	p < 0.001	***
						HIF-1a - vs. HIF-1a +	20.01	p < 0.001	***
						mNotch - vs. mNotch +	6.686	p < 0.01	**

## Sheet: Fig 5B
Fig 5B
			N = 1	N = 2	N = 3	Average	StDev	SqRoot	SEM		Statistical Analysis
0 h	siNT	pcDNA	0.172531	0.242972	0.268587	0.22803	0.0497408	1.73205	0.0287178		One-Way ANOVA followed by Tukey Test
	siOTUB1	OTUB1 WT	0.200571	0.437737	0.341902	0.326737	0.119308	1.73205	0.0688825		Software	GraphPad Prism, Version 4.00
		OTUB1 N22A	0.435482	0.378481	0.377074	0.397012	0.0333229	1.73205	0.019239
8 h	siNT	pcDNA	0.564893	0.96837	0.566097	0.699787	0.232601	1.73205	0.134292		One-Way ANOVA	P<0.0001
	siOTUB1	OTUB1 WT	0.685285	0.951265	0.749464	0.795338	0.138797	1.73205	0.0801348
		OTUB1 N22A	1.26917	1.50752	1.1089	1.2952	0.200582	1.73205	0.115806		Tukey's Multiple Comparison Test	Mean Diff.	q	P value	95% CI of diff
											0 h pcDNA vs 8 h pcDNA	-0.4718	5.521	P < 0.05	-0.8777 to -0.06580
											8 h OTUB1 WT vs 8 h OTUB1 N22A	-0.4999	5.85	P < 0.05	-0.9058 to -0.09390

## Sheet: Fig 6B
Fig 6B
		Time (h)	N=1	N=2	N=3	Average	StDev	SqRoot	SEM
FIH-V5	FLAG-OTUB1 WT	0	1	1	1	1	0	1.73205	0
		6	1.10194	1.15129	1.45794	1.23706	0.192874	1.73205	0.111356
		12	0.847778	0.818709	0.95574	0.874076	0.0722019	1.73205	0.0416858
		24	0.76251	1.28367	1.58979	1.21199	0.418273	1.73205	0.24149
		48	1.50562	1.49011	1.897	1.63091	0.230572	1.73205	0.133121
	FLAG-OTUB1 N22A	0	0.944482	0.729258	0.815443	0.829728	0.108321	1.73205	0.062539
		6	1.15134	0.716514	1.01589	0.961247	0.222503	1.73205	0.128462
		12	0.86471	0.428721	0.985266	0.759566	0.292792	1.73205	0.169043
		24	1.0413	0.502477	1.30509	0.949623	0.409085	1.73205	0.236186
		48	3.24591	0.89321	2.10303	2.08072	1.17651	1.73205	0.679257

[truncated: 6 more sheets: Fig 6D, Fig 6F, S1B Fig, S1D Fig, S4A Fig, S6D Fig]
