# Supplementary material for: FIH Regulates Cellular Metabolism through Hydroxylation of the Deubiquitinase OTUB1
Source: PLoS Biol. 2016 Jan 11;14(1):e1002347. doi: 10.1371/journal.pbio.1002347 (PMC4709136; doi:10.1371/journal.pbio.1002347)
Supplement: S2 Data — Peptides assigned to several proteins are presented together with these assigned proteins in one row. Numerical data used in preparation of S1 Table. (XLSX) [file pbio.1002347.s002.xlsx]

## Sheet: Raw Data
Unfiltered, not normalized OTUB1 WT/N22A IP (LFQ)							Control	OTUB1 WT	OTUB1 N22A	OTUB1 WT/OTUB1 N22A		OTUB1 N22A/OTUB1 WT		T-Test OTUB1 WT/N22A
control1	control1_copy	control2	control2_copy	control3	control3_copy	otub1	otub1_copy	otub2	otub2_copy	otub3	otub3_copy	otubmut1	otubmut1_copy	otubmut2	otubmut2_copy	otubmut3	otubmut3_copy	Peptides	Protein IDs	Majority protein IDs	Protein names	Gene names	Proteins	ratio otub	ratio otubmt	ratio_otub_otubmt	ratio_otubmt_otub	ttest_otub	ttest_otub_otubmt	ttest_otubmt
1	278510	1	1	576450	1	503590000	594660000	706010000	763040000	435330000	861190000	1	478920000	1096800000	1	1	1212000000	1	A1L453	A1L453	Serine protease 38	PRSS38	1	4519.28	3260.63	1.38601	0.721493	2.00843e-06	0.473204	0.0724816
1	1	1	1	4247300	4359300	4713100	1	1	1	1	1	18371000	11380000	1	1	4621800	4946400	1	A2A274;Q99798	A2A274;Q99798	Aconitate hydratase, mitochondrial	ACO2	2	0.547615	4.56849	0.119868	8.34253	0.600543	0.0852577	0.124686
10340000	13010000	1680700	5737700	78839000	56532000	29801000	40584000	32523000	26666000	6423900	8630300	116750000	86950000	48524000	50970000	54516000	81303000	6	P16949-2;P16949;A2A2D0	P16949-2;P16949;A2A2D0	Stathmin	STMN1	3	0.870523	2.64244	0.329439	3.03546	0.805899	0.00256053	0.0236317
1	1	1	1	1	1	12955000	12812000	12786000	16077000	15677000	12928000	15886000	14021000	16944000	16878000	15087000	13705000	1	Q5JWF2;Q5JWF2-2;P38405-2;P63092-4;P63092;P38405;P63092-2;P63092-3;P04899-4;P04899;A8MTJ3;P08754;P09471;P09471-2;P19087;P63096;P11488;H0Y7F4;Q5JWE9;H0Y7E8;Q5JWD1;A2A2R6	Q5JWF2;Q5JWF2-2;P38405-2;P63092-4;P63092;P38405;P63092-2;P63092-3;P04899-4;P04899;A8MTJ3;P08754;P09471;P09471-2;P19087;P63096;P11488;H0Y7F4;Q5JWE9;H0Y7E8;Q5JWD1;A2A2R6	Guanine nucleotide-binding protein G(s) subunit alpha isoforms XLas;Guanine nucleotide-binding protein G(s) subunit alpha isoforms short;Guanine nucleotide-binding protein G(olf) subunit alpha;Guanine nucleotide-binding protein G(i) subunit alpha-2;Guanine nucleotide-binding protein G(t) subunit alpha-3;Guanine nucleotide-binding protein G(k) subunit alpha;Guanine nucleotide-binding protein G(o) …	GNAS;GNAL;GNAI2;GNAT3;GNAI3;GNAO1;GNAT2;GNAI1;GNAT1	22	13872500	1.54202e+07	0.899634	1.11156	9.25245e-10	0.0996982	1.06169e-10
24269000	25284000	23898000	23763000	20091000	22160000	22977000	26263000	27855000	27098000	30885000	24765000	19045000	20369000	31835000	24436000	21868000	24486000	1	A4GXA9-2	A4GXA9-2			1	1.14612	1.01846	1.12535	0.888616	0.0295647	0.199918	0.834793
82679000	39039000	75143000	71439000	28913000	30855000	20393000	23559000	29097000	24099000	27704000	19643000	17330000	11844000	19518000	22031000	19261000	22722000	9	A5YKK6;A5YKK6-2;A5YKK6-3;A5YKK6-4;B5MDN3;H3BNB1;H3BMH0;H3BR89	A5YKK6;A5YKK6-2;A5YKK6-3;A5YKK6-4;B5MDN3	CCR4-NOT transcription complex subunit 1	CNOT1	8	0.440442	0.343545	1.28205	0.779999	0.0123871	0.0387617	0.00511677
1	1	1	1	3240600	3622100	2612200	2895500	2101200	2389500	1	1	6469000	6646800	1	3627100	4024000	4506800	3	O95861-2;O95861;A6NF51;B4DUS9;B4DPS5;F8W1J0;F8VZG4;F8VVW8	O95861-2;O95861;A6NF51;B4DUS9;B4DPS5;F8W1J0	3(2),5-bisphosphate nucleotidase 1	BPNT1	8	1.45692	3.68276	0.395605	2.52777	0.575406	0.0469597	0.0311551
7153100	6416200	1	11856000	10947000	10761000	21172000	12040000	13500000	13946000	12941000	16459000	26426000	14909000	14343000	17017000	17425000	18738000	3	B4DLH4;Q9H910;A6NGP5;Q9H910-2;H3BU16;H3BMV3;H3BTV5;H3BMT0;B4E1P3;H3BMM8	B4DLH4;Q9H910;A6NGP5;Q9H910-2;H3BU16;H3BMV3;H3BTV5;H3BMT0	Hematological and neurological expressed 1-like protein	HN1L	10	1.91071	2.30958	0.827298	1.20875	0.010354	0.194404	0.00233752
1	1	1	1	1	1	1	1	1	1	1	1	1	1	1	1	1	1	1	B4DR61;P61619;Q9H9S3;Q9H9S3-3;Q9H9S3-2;Q8TC24;F8W776;C9JJV4;A6NIF9;F2Z2C7;A6NK38;H7C069;C9JXC6;H7C1Q9	B4DR61;P61619;Q9H9S3;Q9H9S3-3;Q9H9S3-2;Q8TC24;F8W776;C9JJV4;A6NIF9;F2Z2C7;A6NK38;H7C069;C9JXC6;H7C1Q9	Protein transport protein Sec61 subunit alpha isoform 1;Protein transport protein Sec61 subunit alpha isoform 2	SEC61A1;SEC61A2	14	1	1	1	1	#DIV/0!	#DIV/0!	#DIV/0!
1	7889500	6708500	1	1	7311100	1	1	1	5459500	1	1	5773900	7881300	6170200	8185700	10049000	5665800	1	A8MYK1;A8MVT4;A6NJD9;Q16540;H7C2P7	A8MYK1;A8MVT4;A6NJD9;Q16540;H7C2P7	39S ribosomal protein L23, mitochondrial	MRPL23	5	0.249189	1.99579	0.124857	8.00913	0.174521	0.000248354	0.0690689
1	2985500	1954100	1	1	1	1	1	55506000	33006000	1	1	1	25007000	27116000	32271000	33641000	1	1	Q9Y6D0;A8K0M9;F8WAX7	Q9Y6D0;A8K0M9;F8WAX7	Selenoprotein K	SELK	3	17.9188	23.8956	0.749879	1.33355	0.185101	0.681868	0.0144027
44850000	23948000	45171000	43920000	17417000	16585000	14284000	13788000	13924000	11983000	20837000	15477000	7256200	8028600	12648000	8506600	8357600	10436000	5	Q8IUR7;A8MTG8;Q8IUR7-2;Q8IUR7-7;Q8IUR7-8;Q8IUR7-3;B7Z637;G5E9V6;Q8IUR7-6;C9J2I1;G5E9V7;C9JBY2;C9JAA7;C9J8P8;H7C5B7	Q8IUR7;A8MTG8;Q8IUR7-2;Q8IUR7-7;Q8IUR7-8;Q8IUR7-3;B7Z637;G5E9V6;Q8IUR7-6;C9J2I1	Armadillo repeat-containing protein 8	ARMC8	15	0.470543	0.287835	1.63477	0.611709	0.0165914	0.0028149	0.00289142
34198000	37188000	66173000	38228000	54870000	85886000	21993000	12516000	17737000	8731300	6201500	1	16403000	8818500	17696000	26333000	27182000	16765000	3	A8MWD9;P62308;F5H013;Q49AN9;C9JVQ0	A8MWD9;P62308;F5H013;Q49AN9	Small nuclear ribonucleoprotein G-like protein;Small nuclear ribonucleoprotein G	SNRPG	5	0.212226	0.357605	0.593465	1.68502	0.000909197	0.104933	0.00318159
80560000	90235000	77038000	77545000	48313000	55997000	57693000	50891000	54794000	59901000	53113000	69132000	41986000	22908000	50638000	35965000	67609000	58381000	12	A8MXP9;P43243;D6REM6;D6R991;P43243-2;B3KM87;H0Y8T4;D6RIA2;D6RE02;D6RBK5;D6RBI2;D6RAY2;D6RAM9;D6R8Z5;D6REK4;D6RCM3;D6RBS2;D6R9F3;D6RB45	A8MXP9;P43243;D6REM6;D6R991;P43243-2;B3KM87;H0Y8T4	Matrin-3	MATR3	19	0.804128	0.645787	1.24519	0.80309	0.0745285	0.140197	0.020801
59872000	30787000	26851000	29303000	15700000	19423000	3781500	2630800	6138700	4691600	2849200	5027100	1	4940700	1	1	3289300	1952000	4	E9PCT1;A9Z1X7;Q8IYB3;Q8IYB3-2;M0R088	E9PCT1;A9Z1X7;Q8IYB3;Q8IYB3-2;M0R088	Serine/arginine repetitive matrix protein 1	SRRM1	5	0.138064	0.0559648	2.46699	0.405352	0.00219773	0.0341006	0.00123328
1697100000	1876400000	2200000000	2170700000	1571500000	1455200000	980900000	967120000	1093400000	1026500000	1408400000	1177900000	693170000	722520000	831940000	812810000	831460000	811490000	26	B0QY89;Q9Y262;Q9Y262-2;B0QY90;C9K0Q7;C9JHP4;H7C3A0;H0Y7E6	B0QY89;Q9Y262;Q9Y262-2;B0QY90	Eukaryotic translation initiation factor 3 subunit L	EIF3EIP;EIF3L	8	0.606534	0.428715	1.41477	0.706828	0.000527599	0.00113117	1.04955e-05
8973100	7397400	7393600	5551400	6204400	7321800	6693300	7211100	5890000	6251300	8114300	7634900	5507000	6670500	6679200	6469900	8246000	8248600	3	Q01844-5;Q01844;Q01844-3;B0QYK0;Q01844-6;C9JGE3;Q01844-2;H7BY36	Q01844-5;Q01844;Q01844-3;B0QYK0;Q01844-6;C9JGE3;Q01844-2;H7BY36	RNA-binding protein EWS	EWSR1	8	0.975566	0.97618	0.999371	1.00063	0.774016	0.993905	0.799471
3403900	3720400	4406200	1	9447900	8278900	6661900	6772500	4874200	4782400	3637200	3030600	1	10832000	6399600	5787500	7221500	8884200	1	B0QYN7;P63279;H3BQQ9;H3BPC4	B0QYN7;P63279;H3BQQ9;H3BPC4	SUMO-conjugating enzyme UBC9	UBE2I	4	1.01714	1.33727	0.760612	1.31473	0.95794	0.360007	0.443928
1	1	1	1	1	1	18048000	20457000	23762000	24425000	24796000	33167000	20331000	19229000	28649000	29706000	48013000	26594000	2	Q14657;B0S8I7	Q14657;B0S8I7	L antigen family member 3	LAGE3	2	2.41092e+07	2.87537e+07	0.838473	1.19264	4.50496e-07	0.349225	4.80614e-05
1	8120200	1	1	13198000	21670000	26058000	22098000	38751000	29346000	67487000	71103000	35797000	28258000	42484000	57074000	49426000	56132000	7	P46379-3;P46379;B0UX83;P46379-2;P46379-5;P46379-4;F6S6P2;F6U341;F6X9W3;F6VEM6;F6WML8;F6RG75;F6XTU0;F6U1F2;F6UR09;F6TC96;H0Y710;H0Y4L1	P46379-3;P46379;B0UX83;P46379-2;P46379-5;P46379-4;F6S6P2	Large proline-rich protein BAG6	BAG6;BAT3	18	5.92821	6.26151	0.94677	1.05622	0.00404356	0.815378	8.51212e-05
1	1	1	1	1259400	1299300	1231300	1186600	1	1	1	1581600	1568500	1621700	1537300	1408800	1531000	1439500	2	B0UXQ0;P10314;P16189;P16190;P30447;P30459;P30512;P01892;P10316;P13746-2;Q5SRN5;P01891;P04439;P05534;P13746;P16188;P18462;P30450;P30453;P30456;P30457;Q31612;P03989;P10319;P18465;P30461;P30466;P30475;P30485;P30486;P30491;P30492;P30495;P30685;Q04826;Q29836;Q29940;Q31610;Q95365;Q5SRN7;REV__A8MUA6	B0UXQ0;P10314;P16189;P16190;P30447;P30459;P30512;P01892;P10316;P13746-2;Q5SRN5;P01891;P04439;P05534;P13746;P16188;P18462;P30450;P30453;P30456;P30457;Q31612;P03989;P10319;P18465;P30461;P30466;P30475;P30485;P30486;P30491;P30492;P30495;P30685;Q04826;Q29836;Q29940;Q31610;Q95365;Q5SRN7;REV__A8MUA6	HLA class I histocompatibility antigen, A-32 alpha chain;HLA class I histocompatibility antigen, A-31 alpha chain;HLA class I histocompatibility antigen, A-33 alpha chain;HLA class I histocompatibility antigen, A-23 alpha chain;HLA class I histocompatibility antigen, A-74 alpha chain;HLA class I histocompatibility antigen, A-29 alpha chain;HLA class I histocompatibility antigen, A-2 alpha chain;H…	HLA-A;HLA-B	41	1.5631	3.55915	0.439178	2.27698	0.567248	0.0191035	0.00245275
45850000	14924000	33821000	46306000	75842000	76649000	130150000	127200000	116650000	126890000	110290000	60231000	179760000	237340000	143500000	181220000	117030000	132480000	10	Q15366-2;Q15366;Q15366-3;Q15366-6;Q15366-5;Q15366-4;F8VZX2;H3BRU6;B4DXP5;G3V0E8;B4DLC0;P57721;P57721-4;E9PFP8;P57721-5;P57721-3;P57721-2;J3QT27;F8VXH9;F8W0G4;F8VRH0;F8W1G6;H3BSS4;F8VTZ0;P57723;P57723-2;C9J0A4;C9JZY3;C9JTY5;H3BND9;C9J5V4;C9JSA6;C9J7A9;C9IZV9;F8WC71;C9K0A2;H3BSP4	Q15366-2;Q15366;Q15366-3;Q15366-6;Q15366-5;Q15366-4;F8VZX2;H3BRU6;B4DXP5;G3V0E8;B4DLC0;P57721;P57721-4;E9PFP8;P57721-5;P57721-3;P57721-2;J3QT27;F8VXH9;F8W0G4	Poly(rC)-binding protein 2;Poly(rC)-binding protein 3	PCBP2;PCBP3	37	2.28844	3.37886	0.677283	1.47649	0.00151272	0.0284072	0.000194249
76100000	79709000	74873000	93549000	90253000	76770000	100630000	90065000	81966000	90212000	93724000	79879000	91601000	90827000	96999000	114430000	116580000	104400000	11	P33992;B1AHB1;B1AHA9;B1AHB2	P33992;B1AHB1	DNA replication licensing factor MCM5	MCM5	4	1.09205	1.25157	0.87255	1.14607	0.125976	0.040178	0.00437482
13949000	18480000	1	14843000	6404400	5850800	5109000	4352800	4113400	7948200	5098500	5565700	3792900	1	2772900	2517700	4499500	3746300	1	B1AHD1;P55769	B1AHD1;P55769	NHP2-like protein 1	NHP2L1	2	0.540721	0.291116	1.85741	0.538384	0.145908	0.0162103	0.0361592
5523300	4096900	5190500	6138600	7638200	6890700	9769100	6946700	6737700	7687200	7106900	7613700	1	1	12403000	6478000	11112000	11914000	3	O75832;B1AJY7;B1AJY5;O75832-2;B1AJY6	O75832;B1AJY7;B1AJY5	26S proteasome non-ATPase regulatory subunit 10	PSMD10	5	1.29266	1.1812	1.09436	0.913777	0.0300302	0.79029	0.668054
7937000	18157000	8564700	11048000	10548000	10397000	1	1	1	4324100	1	8236800	3963700	1	1	1	1	1	4	B1AL06;C9J5Q3;Q8N983;Q8N983-2;B1AL05;H0Y6Y8;Q8N983-3;Q8N983-4;H0YBU8;M0R051	B1AL06;C9J5Q3;Q8N983;Q8N983-2;B1AL05;H0Y6Y8;Q8N983-3;Q8N983-4;H0YBU8;M0R051	39S ribosomal protein L43, mitochondrial	MRPL43	10	0.188456	0.0594689	3.16898	0.315559	0.00138444	0.381012	7.90317e-05
11332000	4944500	15500000	15546000	1	942950	1	1	1	1	1	1	1	1	1	1	1	1	1	O15511-2;O15511;B1ALC0	O15511-2;O15511;B1ALC0	Actin-related protein 2/3 complex subunit 5	ARPC5	3	1.24313e-07	1.24313e-07	1	1	0.0187593	#DIV/0!	0.0187593
4797600	7878900	5761200	6666700	1959300	1693600	1	1	14991000	7528500	8585400	6267500	5650600	13747000	7545700	7558200	6929300	8295000	1	P35030;P35030-4;P35030-2;P35030-3;F8W7P3;B1AN99	P35030;P35030-4;P35030-2;P35030-3;F8W7P3;B1AN99	Trypsin-3	PRSS3	6	1.29958	1.72915	0.75157	1.33055	0.584021	0.44517	0.0468083
109270000	107200000	114880000	126910000	120930000	106860000	85536000	96474000	65261000	76876000	70084000	68744000	97211000	111190000	88999000	85072000	79753000	102240000	17	Q13310-3;Q13310;Q13310-2;B1ANR0;H0Y5F5;H0YEU6;H0YCC8;B1ANR1	Q13310-3;Q13310;Q13310-2;B1ANR0;H0Y5F5	Polyadenylate-binding protein 4	PABPC4	8	0.674841	0.822775	0.820201	1.21921	8.74611e-05	0.0321234	0.00589567
1	1638100	3452700	2858500	1794700	1	1	1	1	1	1	1	1	1	1	1	1	1	2	P22694-2;P22694-9;P22694-6;P22694-7;P22694-5;P22694;P22694-3;P22694-4;B1APG3;P22694-8;B1APF9;B1APF8;B1APG2;B1APG0;B1APG1;B1APF7;B1APF6;P17612-2;P22694-10;K7ERP6;Q15136	P22694-2;P22694-9;P22694-6;P22694-7;P22694-5;P22694;P22694-3;P22694-4;B1APG3;P22694-8;B1APF9;B1APF8;B1APG2;B1APG0;B1APG1;B1APF7;B1APF6;P17612-2;P22694-10;K7ERP6;Q15136	cAMP-dependent protein kinase catalytic subunit beta	PRKACB;KIN27	21	6.15763e-07	6.15763e-07	1	1	0.0191547	#DIV/0!	0.0191547
14170000	13731000	9440000	10957000	13276000	9053700	6721300	8551100	7507900	8444400	7221400	8776000	5681400	6030600	7148000	7345800	6343100	5865500	3	Q96S59;B2R8E1;Q96S59-2	Q96S59;B2R8E1;Q96S59-2	Ran-binding protein 9	RANBP9	3	0.668606	0.5439	1.22928	0.813484	0.00260323	0.00780959	0.000232951
815730	1174500	1	992000	1	1147200	3452400	5670200	4129700	4911000	5407300	5891400	2868900	3074000	5073100	4987700	5197200	5083100	1	B3EWF7	B3EWF7	Laforin, isoform 9	EPM2A	1	7.13464	6.36504	1.12091	0.892132	2.73712e-06	0.39216	2.36141e-05
302650000	350500000	346820000	283330000	349420000	440250000	432520000	511070000	460260000	398300000	360930000	359770000	641020000	850220000	586330000	646120000	568050000	559710000	9	P55209;H0YIV4;F5H4R6;B3KNT8;F8VY35;F8W0J6;F8VV59;F8W118;F8W020;B7Z9C2;F8W543;H0YHC3;H0YH88;F8VRJ2;F8VUX1;F8VXI6;F8VVB5;B3KV44	P55209;H0YIV4;F5H4R6;B3KNT8;F8VY35;F8W0J6;F8VV59;F8W118;F8W020;B7Z9C2;F8W543;H0YHC3;H0YH88;F8VRJ2;F8VUX1;F8VXI6;F8VVB5;B3KV44	Nucleosome assembly protein 1-like 1	NAP1L1	18	1.21702	1.85794	0.655039	1.52663	0.0456056	0.00135872	0.000133677
15528000	1	20362000	28591000	27022000	37701000	32030000	34035000	52129000	28639000	43614000	43224000	75680000	82746000	43811000	42760000	47035000	39047000	4	P61289-2;P61289;K7ESG5;B3KQ25;K7ENH2;K7EKR3;K7EPX6;K7EMD0	P61289-2;P61289;K7ESG5;B3KQ25;K7ENH2;K7EKR3;K7EPX6;K7EMD0	Proteasome activator complex subunit 3	PSME3	8	1.80854	2.56245	0.705786	1.41686	0.0217765	0.0861292	0.00491585
128190000	106770000	123240000	137660000	102010000	78046000	125390000	140780000	86583000	137840000	140080000	137670000	172840000	147900000	137410000	141740000	160700000	157350000	9	J3KPW7;Q92769;B3KRS5;H3BM24;E5RFP9;E5RG37;E5RH52;E5RHE7;E5RGV4;E5RJ04;E5RFI6;E5RK19;Q96G03;F5H6V2;O15379-2;O15379;E7ESJ6	J3KPW7;Q92769;B3KRS5;H3BM24	Histone deacetylase 2;Histone deacetylase	HDAC2	17	1.13674	1.35807	0.83703	1.1947	0.239279	0.0338539	0.00291087
1392300000	1361800000	1550900000	1562600000	1091300000	1052800000	811520000	673080000	740830000	717420000	773850000	698710000	495890000	576150000	661650000	652310000	610010000	551750000	21	B3KS98;O15372;E5RJT0;E5RGU4;E5RFH0;E5RFW7;E5RH59;E5RHC7	B3KS98;O15372;E5RJT0	Eukaryotic translation initiation factor 3 subunit H	EIF3S3;EIF3H	8	0.55112	0.442822	1.24456	0.803495	6.80686e-05	0.00138768	1.21566e-05
1139100000	1089300000	1636600000	1497900000	956680000	867540000	863780000	769760000	719850000	744290000	881750000	835360000	499370000	567870000	609070000	600390000	710450000	787450000	17	B3KSH1;O00303;B4DEW9;H0YDT6;E9PQV8	B3KSH1;O00303;B4DEW9	Eukaryotic translation initiation factor 3 subunit F	EIF3F	5	0.669919	0.52519	1.27558	0.783959	0.0112149	0.00626183	0.00149868
44051000	45291000	40159000	29286000	41615000	36025000	61309000	57372000	50951000	47766000	54421000	74009000	23132000	32498000	52414000	52476000	52091000	57883000	5	Q66PJ3;Q66PJ3-2;Q66PJ3-3;Q66PJ3-4;F8WCT1;B3V0L1;H7BZV4;F5GYV5;F5H7X4;Q66PJ3-5;F8WEP2	Q66PJ3;Q66PJ3-2;Q66PJ3-3;Q66PJ3-4;F8WCT1;B3V0L1;H7BZV4;F5GYV5;F5H7X4	ADP-ribosylation factor-like protein 6-interacting protein 4	ARL6IP4	11	1.46273	1.14409	1.27851	0.782163	0.00234243	0.0954707	0.378114
237530000	224970000	106540000	118530000	400340000	348220000	436160000	393340000	295930000	318390000	150500000	119830000	900050000	862150000	402680000	515200000	477190000	480470000	24	P25705;P25705-2;K7ENP3;K7EK77;K7ERX7;K7ENJ4;K7EJP1;K7EQH4;REV__O00522;REV__O00522-3;REV__H3BM74;REV__H3BM14;REV__Q9Y5A7;REV__Q9Y5A7-2;REV__F8WDB6;REV__C9JRT6;REV__C9JF32;REV__C9J718;REV__C9J7X7;REV__F8WDL9;REV__C9JEW7;REV__C9JBN7;K7ESA0;REV__C9J3W7;REV__C9JD81;REV__C9JJM9	P25705;P25705-2;K7ENP3;K7EK77	ATP synthase subunit alpha, mitochondrial	ATP5A1	26	1.19359	2.53302	0.471213	2.12218	0.528947	0.010732	0.00450859
33230000	31814000	28558000	26116000	41404000	34128000	54788000	48789000	33032000	46648000	46148000	37468000	73540000	52503000	54448000	56214000	60033000	70369000	10	Q9P2J5;B4DER1;F5H698;B4DJ10	Q9P2J5;B4DER1;F5H698;B4DJ10	Leucine--tRNA ligase, cytoplasmic	LARS	4	1.36683	1.88019	0.726962	1.37559	0.0117165	0.00604616	4.40459e-05
16499000	18996000	12395000	10961000	11905000	23241000	1	20082000	1	31074000	22632000	13323000	25595000	1	36560000	39144000	29692000	31126000	2	B1AKR6;H3BQI1;B4DFR2;Q8TF09;Q9NP97;Q7Z4M1;Q9NP97-2;H3BPA0;H3BNG9	B1AKR6;H3BQI1;B4DFR2;Q8TF09;Q9NP97;Q7Z4M1;Q9NP97-2;H3BPA0;H3BNG9	Dynein light chain roadblock-type 2;Dynein light chain roadblock-type 1	DYNLRB1;DYNLRB2	9	0.926742	1.7247	0.537334	1.86104	0.839117	0.136455	0.0915689
227200000	272150000	78425000	76869000	548490000	471960000	563720000	541640000	433780000	441600000	158070000	107670000	1502800000	1278300000	500050000	579830000	796520000	774070000	18	P00338-3;P00338;P00338-2;P00338-5;P00338-4;F5GXY2;F5GYU2;F5GXH2;F5H6W8;F5H5J4;F5GZQ4;F5GXU1;F5GWW2;F5GXC7;F5H8H6;Q9BYZ2;Q6ZMR3;P07864;F5H245;G3XAP5;F5H155;F5H5G7	P00338-3;P00338;P00338-2;P00338-5;P00338-4;F5GXY2;F5GYU2	L-lactate dehydrogenase A chain	LDHA	22	1.34111	3.24255	0.413597	2.41781	0.419303	0.0150558	0.00624547
382970000	351000000	123210000	101200000	939600000	926380000	1024500000	1027200000	750810000	722150000	501880000	413220000	2096200000	2111200000	1240900000	1184200000	1469100000	1350000000	27	P04075-2;P04075;J3KPS3;H3BQN4;H3BPS8;H3BUH7;H3BR04;H3BMQ8;H3BU78;H3BR68;P09972;A8MVZ9;P05062;Q5T7D5;J3QKP5;J3KSV6;C9J8F3;K7EKH5	P04075-2;P04075;J3KPS3;H3BQN4;H3BPS8;H3BUH7;H3BR04;H3BMQ8	Fructose-bisphosphate aldolase A;Fructose-bisphosphate aldolase	ALDOA	18	1.57195	3.34646	0.469736	2.12885	0.177663	0.0019655	0.000729577
40029000	35897000	58497000	40606000	25739000	29335000	26859000	27293000	23868000	76219000	40172000	37973000	13735000	12016000	20088000	24200000	18930000	23267000	5	Q14011;D6W5Y5;B4E2X2;K7EQR7;K7EPM4;K7EMY9;K7ER40;K7ELT6;K7EJV5;K7ENX8;K7ELV6;Q9BQ75;Q9BQ75-2;B3KT17;C9J384;K7ELL4;H7C515;K7EQL0;K7EIF7;K7ENN6;K7EQX4	Q14011;D6W5Y5;B4E2X2;K7EQR7;K7EPM4;K7EMY9;K7ER40;K7ELT6;K7EJV5;K7ENX8;K7ELV6	Cold-inducible RNA-binding protein	CIRBP	21	1.00991	0.487764	2.07049	0.482976	0.967988	0.0349402	0.00323155
1007800000	846860000	1360500000	1331000000	837270000	831290000	716390000	543140000	718900000	606710000	631100000	458470000	291940000	289070000	403440000	403450000	283190000	308880000	7	P62318;B4DJP7;H3BT13	P62318;B4DJP7;H3BT13	Small nuclear ribonucleoprotein Sm D3	SNRPD3	3	0.591291	0.318594	1.85594	0.53881	0.00317359	0.000141009	4.96871e-05
7548900	9451400	1	7227400	12773000	16121000	14421000	13739000	12707000	10403000	5841100	12611000	39448000	34001000	13668000	14282000	18404000	20226000	3	P51148-2;P51148;K7ERQ8;P20339;P61020;B4DJA5;P61020-2;K7ERI8;F8VVK3;F8VUA5;F8VVZ0;F8VWU4;K7ENY4;F8VWZ7;F8VSF8;F8VPW9;F8WD79;F8WCY6	P51148-2;P51148;K7ERQ8;P20339;P61020;B4DJA5;P61020-2;K7ERI8;F8VVK3;F8VUA5;F8VVZ0;F8VWU4	Ras-related protein Rab-5C;Ras-related protein Rab-5A;Ras-related protein Rab-5B	RAB5C;RAB5A;RAB5B	18	1.3125	2.636	0.497912	2.00839	0.309838	0.028732	0.0150867
17196000	18805000	8226800	11579000	35130000	28573000	43211000	46679000	29243000	28762000	1	1	109280000	89101000	30349000	36177000	32526000	37427000	3	P45880-1;P45880;P45880-2;B4DKM5	P45880-1;P45880;P45880-2;B4DKM5	Voltage-dependent anion-selective channel protein 2	VDAC2	4	1.23751	2.80195	0.441662	2.26417	0.622629	0.084855	0.033856
8837500	9828300	8650400	9337100	8089400	8382400	9698500	9303100	10254000	9818400	8504700	12180000	6027900	5459000	9465500	9069300	9007000	7578300	2	Q86YP4-3;Q86YP4;Q86YP4-2;B4DKZ7;F5H7D9;Q8WXI9	Q86YP4-3;Q86YP4;Q86YP4-2;B4DKZ7;F5H7D9;Q8WXI9	Transcriptional repressor p66-alpha;Transcriptional repressor p66-beta	GATAD2A;GATAD2B	6	1.12487	0.877307	1.28218	0.77992	0.0802868	0.0288393	0.174122
63534000	128180000	88076000	66692000	141170000	146920000	169700000	166040000	168440000	513470000	152340000	473760000	260720000	208080000	175890000	158690000	264390000	175970000	7	P36542;P36542-2;B4DL14	P36542;P36542-2;B4DL14	ATP synthase subunit gamma, mitochondrial;ATP synthase gamma chain	ATP5C1	3	2.59033	1.95997	1.32162	0.756648	0.040175	0.377237	0.00182415
135930000	154170000	181940000	216420000	165660000	118820000	163730000	193070000	199810000	179020000	221210000	145750000	196440000	200130000	197270000	191880000	211130000	203730000	10	B4DLN1;P52815;B4E1E9;I3L1E8	B4DLN1;P52815	39S ribosomal protein L12, mitochondrial	SLC25A10;MRPL12	4	1.13326	1.23397	0.918381	1.08887	0.2547	0.179408	0.0247857
18559000	15287000	4914700	1	43063000	43158000	41927000	37367000	23777000	34779000	1	12533000	111490000	120790000	46923000	31599000	65136000	58944000	7	O75390;B4DJV2;H0YH82;F8W1S4;F8VPA1;F8VPF9;H0YIC4;F8W4S1;F8VTT8;F8VRI6;F8VX68;F8VRP1;F8VX07;F8VZK9;F8W642;F8VR34;F8VWQ5	O75390;B4DJV2	Citrate synthase, mitochondrial;Citrate synthase	CS	17	1.20324	3.47957	0.345802	2.89183	0.682623	0.0144571	0.0105655
4392800	1	1	1	8227900	7490300	7528200	7677800	6399200	6193500	1	1	11834000	10879000	1	6288700	1	7422300	2	Q15907;P62491;H3BSC1;B4DMK0;H3BMH2;J3KQP6;P62491-2;B4DQU5	Q15907;P62491;H3BSC1;B4DMK0;H3BMH2;J3KQP6;P62491-2;B4DQU5	Ras-related protein Rab-11B;Ras-related protein Rab-11A	RAB11B;RAB11A	8	1.38226	1.81115	0.763197	1.31028	0.568743	0.588139	0.325705
1	1	1	1	12213000	11913000	1	1	1	1	1	1	12584000	28444000	12308000	15015000	13356000	1	1	O43776;B4DN60	O43776;B4DN60	Asparagine--tRNA ligase, cytoplasmic	NARS	2	2.48694e-07	3.38668	7.34331e-08	1.36178e+07	0.144969	0.00422302	0.0581754
103840000	95083000	93440000	92873000	63133000	131500000	179350000	156070000	100610000	106920000	99812000	109590000	275310000	215260000	212160000	125490000	133000000	95290000	10	B4DNJ6;Q9Y3F4;B0AZV0;H0YH33	B4DNJ6;Q9Y3F4;B0AZV0	Serine-threonine kinase receptor-associated protein	STRAP	4	1.29745	1.82198	0.712111	1.40428	0.111325	0.136074	0.0224573
1081800000	1120300000	399690000	346080000	2486400000	2510200000	2362700000	2187800000	1895600000	1819700000	593830000	551200000	4969900000	5488800000	2993100000	3085800000	2943900000	2950300000	32	P06733;P06733-2;K7EM90;P13929;P13929-2;P13929-3;E5RGZ4;K7EKN2;K7EPM1;E5RG95;E5RI09;P09104;B7Z2X9;F5H0C8;F5H1C3;K7ERS8	P06733;P06733-2	Alpha-enolase	ENO1	16	1.18458	2.82357	0.419531	2.38362	0.642844	0.00371028	0.00294804
94992000	79537000	136160000	92970000	62384000	67243000	61664000	66236000	60186000	71833000	61952000	57696000	21993000	33195000	43110000	42856000	40691000	49208000	6	R4GMX8;Q6VN20;B4DQH9;B4DID0;B3KP49;R4GN91;R4GNA3;R4GMX7	R4GMX8;Q6VN20;B4DQH9;B4DID0;B3KP49	Ran-binding protein 10	RANBP10	8	0.711751	0.433263	1.64277	0.608728	0.0431319	0.000229541	0.00142474
51897000	65533000	37561000	54399000	28157000	22363000	11910000	1	1	1	1	1	6360300	9324100	1	1	1	6232300	6	Q13595;B4DUA9;B4DQI6;Q13595-2	Q13595;B4DUA9;B4DQI6;Q13595-2	Transformer-2 protein homolog alpha	TRA2A	4	0.0458236	0.0843242	0.543421	1.84019	0.00016704	0.537205	0.000212218
283270000	274260000	374690000	330840000	137520000	147420000	69768000	82708000	70807000	46169000	44274000	55897000	25445000	18464000	35969000	33859000	36541000	22602000	11	F8W0Q9;Q8NEY8-2;Q8NEY8-8;E9PAX8;Q8NEY8;Q8NEY8-6;Q8NEY8-3;B7Z8L1;F8WF16;F8W6A0;F8VWU8;F8VPY7;Q8NEY8-5;F8VRK2;REV__K7EN69;Q8NEY8-7;F8VXV7	F8W0Q9;Q8NEY8-2;Q8NEY8-8;E9PAX8;Q8NEY8;Q8NEY8-6;Q8NEY8-3;B7Z8L1;F8WF16;F8W6A0;F8VWU8;F8VPY7	Periphilin-1	PPHLN1	17	0.238775	0.11168	2.13803	0.46772	0.000601775	0.000843717	0.000173236
2351400	1	1	1	1	6031700	5325500	1	1	1	1	1490000	1	7423600	1	5362500	1	6452100	1	Q92973;Q92973-2;Q92973-3;E7EW37;B4DSC0	Q92973;Q92973-2;Q92973-3;E7EW37;B4DSC0	Transportin-1	TNPO1	5	0.813005	2.29488	0.354269	2.82271	0.848157	0.251087	0.33086
9118300	14790000	8413300	9561400	3667800	10278000	6812300	6779500	6319200	9036800	6026400	6210300	10328000	4740000	3648400	3261900	4324300	3380100	2	O43395;E7EVD1;B4DSY9	O43395;E7EVD1;B4DSY9	U4/U6 small nuclear ribonucleoprotein Prp3	PRPF3	3	0.737693	0.531674	1.38749	0.720725	0.140816	0.138447	0.038223
9274500	7251600	1	5096900	15537000	14715000	12998000	17119000	9475100	9851800	1	6301200	42512000	26044000	16402000	16096000	19258000	22225000	4	P61586;E9PN11;P08134;Q5JR08;U3KQV3;U3KQA9;Q5JR05;C9JX21;E9PQH6;C9JNR4;Q5JR07;Q5JR06;C9JRM1;C9J1T2;E9PLA2	P61586;E9PN11;P08134;Q5JR08	Transforming protein RhoA;Rho-related GTP-binding protein RhoC	RHOA;RHOC	15	1.0746	2.7477	0.391092	2.55694	0.852878	0.011699	0.00939372
44190000	64804000	77039000	96765000	45493000	44007000	32487000	27621000	48856000	46474000	47500000	45230000	19236000	22640000	36234000	28411000	30439000	48266000	6	Q8ND56;Q8ND56-2;B4DTG6;K7EMZ9;I3L4Q1	Q8ND56;Q8ND56-2;B4DTG6	Protein LSM14 homolog A	LSM14A	5	0.666584	0.497521	1.33981	0.746373	0.0563496	0.0908778	0.00993787
1	1	1	1	1	1	1	1	1	1	1	1	1	1	1	1	1	1	1	Q13126-2;Q13126-3;Q13126-5;B4DUC8;Q13126-6;Q13126;Q13126-4;J3QSB7;Q13126-7;F2Z2F3	Q13126-2;Q13126-3;Q13126-5;B4DUC8;Q13126-6;Q13126;Q13126-4;J3QSB7;Q13126-7;F2Z2F3	S-methyl-5-thioadenosine phosphorylase	MTAP	10	1	1	1	1	#DIV/0!	#DIV/0!	#DIV/0!
50509000	51018000	25827000	20974000	111080000	103580000	110270000	112230000	82266000	98221000	8055300	26860000	336370000	333350000	161030000	158280000	225750000	212290000	12	B4DGP8;P27824;B4E2T8;H0Y9Q7;D6RDP7;D6RGY2;D6RB85;D6RAU8;D6RFL1;H0Y9H1;D6RAQ8;D6RD16;D6RHJ3	B4DGP8;P27824;B4E2T8;H0Y9Q7;D6RDP7;D6RGY2;D6RB85;D6RAU8;D6RFL1	Calnexin	CANX	13	1.20638	3.93145	0.306854	3.25888	0.615078	0.00130687	0.000619006
10078000	9854000	10338000	8678300	7864000	9280400	8845600	10625000	9712800	10606000	13794000	10431000	5995100	8320000	7153200	5173700	8493800	10526000	3	B4DVB8;Q15717	B4DVB8;Q15717	ELAV-like protein 1	ELAVL1	2	1.14123	0.814042	1.40192	0.713305	0.123548	0.0149404	0.0749927
10249000	10254000	18532000	14115000	20166000	20622000	23147000	19441000	20301000	30344000	16094000	1	66915000	29567000	20919000	20466000	46184000	40784000	5	P47897;B4DWJ2;H7C0R3	P47897;B4DWJ2;H7C0R3	Glutamine--tRNA ligase	QARS	3	1.16382	2.39344	0.486254	2.05654	0.587316	0.0438941	0.0157349
140920000	135050000	131240000	179230000	108750000	111480000	136510000	125370000	121600000	145660000	195470000	152540000	94213000	169730000	173740000	145260000	111740000	124670000	15	B4DWW4;P25205;J3KQ69;Q7Z6P5	B4DWW4;P25205;J3KQ69	DNA replication licensing factor MCM3	MCM3	4	1.08737	1.01572	1.07054	0.934108	0.454834	0.584305	0.901715
2025400	1	1	1	5552000	6104100	4380300	4109900	4127200	4367100	4232700	3914900	6763200	8350000	4363100	5013700	6282400	4462500	1	P25685;B4DX52;M0R080	P25685;B4DX52;M0R080	DnaJ homolog subfamily B member 1	DNAJB1	3	1.83694	2.57537	0.713273	1.40199	0.134243	0.0249867	0.0223032
103390000	91797000	113330000	151280000	84957000	102810000	36375000	16823000	15976000	33054000	60069000	11016000	10700000	18665000	1	9936200	8112100	25628000	10	P61158;B4DXW1;F5H3P5;Q9P1U1;Q9P1U1-2;Q9P1U1-3;C9IZN3;Q9C0K3;H7C4J1	P61158;B4DXW1;F5H3P5	Actin-related protein 3	ACTR3	9	0.267638	0.112794	2.37281	0.421442	6.79617e-05	0.0720876	2.89861e-06
6535500	6610500	1	1	8195600	8109600	1	1	1	1	1	1	10205000	12186000	5117000	1	5850600	7175000	2	P49189;B4DXY7	P49189;B4DXY7	4-trimethylaminobutyraldehyde dehydrogenase	ALDH9A1	2	2.03727e-07	1.3763	1.48025e-07	6.7556e+06	0.0110808	0.00303342	0.449851
565490000	597120000	507580000	538440000	285500000	323400000	217240000	175220000	192470000	149800000	223880000	239160000	155040000	194580000	133380000	155600000	175390000	173890000	13	P07910;G3V2Q1;P07910-2;G3V4C1;B4DY08;G3V4W0;G3V576;P07910-4;G3V575;G3V555;P07910-3;B4DSU6;G3V251;G3V3K6;G3V5X6;O60812;G3V4M8;G3V2H6;G3V2D6;G3V5V7	P07910;G3V2Q1;P07910-2;G3V4C1;B4DY08;G3V4W0;G3V576;P07910-4;G3V575;G3V555;P07910-3;B4DSU6;G3V251;G3V3K6;G3V5X6;O60812;G3V4M8	Heterogeneous nuclear ribonucleoproteins C1/C2;Heterogeneous nuclear ribonucleoprotein C-like 1	HNRNPC;HNRNPCL1	20	0.425113	0.350619	1.21247	0.824766	0.000659618	0.0557325	0.000229653
1	1	1	1	1	1	1	1	1	1	1	1	1	1	1	1	1	1	2	Q9BZE4;B7Z7A3;B4DY13	Q9BZE4;B7Z7A3;B4DY13	Nucleolar GTP-binding protein 1	GTPBP4	3	1	1	1	1	#DIV/0!	#DIV/0!	#DIV/0!
3734300	3147600	2858800	2826800	5177800	3628000	4344900	4573200	5278300	5106600	5836700	6530100	5331700	1	5661500	5436500	8747500	9617500	3	P13995;Q7Z650;B4DY35;B9A062;B8ZZU9;F8W7P9;Q9H903-3	P13995;Q7Z650;B4DY35;B9A062	Bifunctional methylenetetrahydrofolate dehydrogenase/cyclohydrolase, mitochondrial;NAD-dependent methylenetetrahydrofolate dehydrogenase;Methenyltetrahydrofolate cyclohydrolase	MTHFD2	7	1.48175	1.62795	0.91019	1.09867	0.00553366	0.721554	0.148155
222430000	220620000	183190000	162310000	259530000	251580000	413880000	416970000	387380000	389800000	401240000	403240000	536140000	553630000	508510000	525010000	519570000	523980000	27	B4DYH1;Q92598;Q92598-3;Q92598-2;B4DY72;Q5TBM3;R4GN69;Q8TDX9	B4DYH1;Q92598;Q92598-3;Q92598-2;B4DY72	Heat shock protein 105 kDa	HSPH1	8	1.85626	2.43667	0.761804	1.31267	4.64007e-07	2.28297e-08	4.31105e-09
11028000	10763000	10928000	10177000	16101000	12927000	14491000	14350000	14300000	15026000	15372000	13081000	14879000	12992000	14429000	15429000	14677000	14479000	3	Q9H0D6;B4DZC3;Q9H0D6-2	Q9H0D6;B4DZC3;Q9H0D6-2	5-3 exoribonuclease 2	XRN2	3	1.20433	1.20801	0.99695	1.00306	0.0289439	0.925735	0.0272374
7549400	11409000	9446000	6600000	13267000	12818000	14262000	16518000	14199000	15066000	11990000	12308000	16774000	17544000	15419000	18165000	17481000	18056000	4	P35606;B4DZI8;H0Y938;H0YAC7	P35606;B4DZI8	Coatomer subunit beta	COPB2	4	1.38065	1.69324	0.815389	1.22641	0.0152238	0.00281945	0.000158801
104170000	100770000	90275000	126260000	87997000	71992000	10015000	12351000	14336000	12831000	15618000	13380000	7217500	5664500	7433100	12489000	6834000	11438000	4	O14730;O14730-2;B4E1Q4;J3QQL5	O14730;O14730-2;B4E1Q4	Serine/threonine-protein kinase RIO3	RIOK3	4	0.135057	0.0878405	1.53753	0.650394	5.74834e-07	0.0074645	3.69558e-07
380230000	432560000	413860000	405880000	295480000	268850000	484690000	556500000	552230000	568010000	771630000	881200000	375850000	375880000	450250000	497020000	595970000	585900000	11	P84103;B4E241;REV__Q5VSN0	P84103;B4E241	Serine/arginine-rich splicing factor 3	SRSF3	3	1.73623	1.31136	1.324	0.755289	0.00289413	0.0635902	0.0404688
6097900	11151000	6746400	6111000	7178100	6835200	1	1	1	1	1	1	1	1	1	1	1	1	2	Q8TB72;Q8TB72-3;B4E2B6;Q8TB72-2;C9JW01	Q8TB72;Q8TB72-3;B4E2B6;Q8TB72-2;C9JW01	Pumilio homolog 2	PUM2	5	1.35994e-07	1.35994e-07	1	1	2.69309e-06	#DIV/0!	2.69309e-06
1	8266500	2421900	3500200	3255100	2797200	1	1	1	1	1	1	1	1	1	1	1	1	2	P27105;B4E2V5;P27105-2	P27105;B4E2V5;P27105-2	Erythrocyte band 7 integral membrane protein	STOM	3	2.96429e-07	2.96429e-07	1	1	0.0121551	#DIV/0!	0.0121551
47542000	30749000	57188000	44379000	31440000	31162000	31589000	29995000	33290000	27550000	19111000	36362000	23908000	23586000	29292000	28780000	24763000	23331000	6	P55084;B4E2W0;F5GZQ3;B5MD38;C9JE81;C9JEY0;C9K0M0	P55084;B4E2W0;F5GZQ3;B5MD38;C9JE81;C9JEY0	Trifunctional enzyme subunit beta, mitochondrial;3-ketoacyl-CoA thiolase	HADHB	7	0.733717	0.633754	1.15773	0.863758	0.0617192	0.161511	0.00958155
6403200	8294100	3260000	4919000	13623000	9363100	17111000	8946400	13921000	9210600	3940900	6610800	7929100	47908000	31154000	40547000	24913000	13911000	3	Q9Y285;B4E363;K7ER16;K7ER00;K7EK06;K7EPH2	Q9Y285;B4E363;K7ER16;K7ER00;K7EK06	Phenylalanine--tRNA ligase alpha subunit	FARSA	6	1.30261	3.62742	0.3591	2.78474	0.371285	0.0219356	0.010837
12444000	9433600	7379700	1	1	10606000	9349800	10563000	8476500	7942000	1	1	15997000	11335000	10280000	1	11082000	12747000	2	P35244;B5MC59	P35244;B5MC59	Replication protein A 14 kDa subunit	RPA3	2	0.911397	1.54129	0.59132	1.69113	0.845483	0.185679	0.275945
17598000	17311000	16168000	12521000	16434000	15161000	28316000	7186800	36740000	46274000	25987000	27836000	37815000	30747000	36802000	31266000	29551000	17249000	2	P24666;B5MCC7;G5E9R5;P24666-2;P24666-3;D3YTI2;F2Z2Q9	P24666;B5MCC7;G5E9R5;P24666-2;P24666-3;D3YTI2;F2Z2Q9	Low molecular weight phosphotyrosine protein phosphatase	ACP1	7	1.81043	1.92693	0.93954	1.06435	0.0373766	0.767949	0.000779804
36877000	31111000	15630000	16637000	48120000	40011000	42394000	45784000	37718000	38737000	24581000	23218000	67178000	81455000	55148000	79921000	56701000	81551000	7	Q15084-2;B5MCQ5;F8WA83;Q15084;B7Z254	Q15084-2;B5MCQ5;F8WA83;Q15084;B7Z254	Protein disulfide-isomerase A6	PDIA6	5	1.12764	2.23984	0.503448	1.9863	0.554598	0.000259452	0.000347413
3275700	1	1	1	1	1	5597200	5953500	5106700	1	1	1	1	9344700	6882900	4586700	1	5447800	2	Q15019-2;Q15019;B5MCX3;H7C2Y0;C9J2Q4;H7C310	Q15019-2;Q15019;B5MCX3;H7C2Y0;C9J2Q4;H7C310	Septin-2	2002-09-01	6	5.08514	8.01724	0.634275	1.5766	0.132246	0.436603	0.0403097
210420000	233670000	96930000	86016000	530810000	545340000	369050000	322300000	272940000	268830000	110880000	93561000	945130000	1034900000	380100000	479920000	501060000	475530000	9	J3KQE5;B5MDF5;P62826;F5H018;H0YFC6;B4DV51	J3KQE5;B5MDF5;P62826;F5H018;H0YFC6	GTP-binding nuclear protein Ran	RAN	6	0.844042	2.24088	0.376656	2.65494	0.653587	0.00901275	0.0319322
6169500	10565000	11160000	10081000	7149000	8397700	5565500	7406100	5785300	5776700	5680400	7561600	3762800	4535800	4252300	3502000	4922800	5650600	3	B7Z1E5;Q92600;B5MDQ4;F8WBZ6	B7Z1E5;Q92600	Cell differentiation protein RCD1 homolog	RQCD1	4	0.705793	0.497481	1.41873	0.704854	0.0154414	0.00377161	0.000460375
4740200	3226100	1	6741300	5220700	3717700	1795700	1	2435400	1	2059300	1	1	1	1	1	1	1	1	O75461;G5E936;O75461-2;B7Z1I8	O75461;G5E936;O75461-2;B7Z1I8	Transcription factor E2F6	E2F6	4	0.266024	2.53743e-07	1.0484e+06	9.53834e-07	0.0202169	0.0522793	0.00178209
1	1	1	1	6384000	7705100	1	5377700	1	1	3543600	3685800	1	1	1	1	1	1	2	P54709;B7Z1N7;C9JA36;C9JXZ1;H7C4L9	P54709;B7Z1N7;C9JA36;C9JXZ1;H7C4L9	Sodium/potassium-transporting ATPase subunit beta-3	ATP1B3	5	0.894812	4.25861e-07	2.10118e+06	4.75922e-07	0.892705	0.0567717	0.147299
1	1	1	1	6520200	6676400	6246700	9675400	6705800	5156800	2213300	1332700	11017000	20672000	8948200	8926300	13079000	10768000	2	O43852-3;O43852;O43852-5;O43852-4;O43852-2;O43852-6;O43852-10;O43852-11;O43852-15;O43852-9;H0Y875;O43852-14;O43852-13	O43852-3;O43852;O43852-5;O43852-4;O43852-2;O43852-6;O43852-10;O43852-11;O43852-15;O43852-9;H0Y875;O43852-14;O43852-13	Calumenin	CALU	13	2.37415	5.56283	0.426788	2.34309	0.137824	0.00957203	0.00131399
6892200	7010700	4228400	3034100	20197000	12687000	13499000	12427000	10253000	6611000	6144300	7942800	40374000	36284000	22759000	15063000	24313000	23477000	4	P61026;P51153;P59190;P59190-2;B4DEK7;Q92930;Q92928;F5GY21;H0YNE9;E9PLD0;H0YMN7;H0YL94;H0YLJ8	P61026;P51153	Ras-related protein Rab-10;Ras-related protein Rab-13	RAB10;RAB13	13	1.05232	3.00225	0.350509	2.85299	0.874284	0.00147532	0.00309755
1	1	2113500	1	6985000	6116300	9495500	2854100	1	1	1	1	11485000	8059300	1	9237500	1	4125900	3	B7Z2R2;P14927-2;P14927;E5RHG9	B7Z2R2;P14927-2;P14927;E5RHG9	Cytochrome b-c1 complex subunit 7	UQCRB	4	0.811683	2.16287	0.37528	2.66468	0.819733	0.205008	0.244772
1277700	11642000	1140800	1	17581000	8192900	3161000000	3338600000	4924500000	4681300000	7363800000	7121400000	3135500000	2385500000	4089300000	4406200000	4696300000	4911500000	16	P61088;F8VSD4;F8VV71;F8VQQ8;Q5JXB2;F8VZ29;Q7Z3D6-2;Q7Z3D6;Q7Z3D6-3;Q7Z3D6-4;H0YB09;Q7Z3D6-5;H0YB62;REV__Q8NCH0;REV__H0YN65;E5RIU5;E5RJ62	P61088;F8VSD4;F8VV71;F8VQQ8	Ubiquitin-conjugating enzyme E2 N	UBE2N	17	767.944	593.063	1.29488	0.772273	4.13293e-05	0.196322	1.89965e-06
6522900	5922700	4205800	4091900	17979000	18340000	18525000	23018000	23074000	37525000	4906200	1	86808000	44442000	24213000	4630300	46946000	43370000	1	Q14964;P20340;P20340-2;Q9NRW1;H0YGL6;B7Z337;P20340-4;H7BYW1;J3KR73;C9JU14;C9JB90	Q14964;P20340;P20340-2;Q9NRW1;H0YGL6;B7Z337;P20340-4;H7BYW1;J3KR73;C9JU14;C9JB90	Ras-related protein Rab-39A;Ras-related protein Rab-6A;Ras-related protein Rab-6B	RAB39A;RAB6A;RAB6B	11	1.87599	4.38835	0.427493	2.33922	0.209373	0.0847888	0.0188849
1	1	1	1	5973500	1	8498000	9296300	16848000	13573000	12368000	1	8354900	8954700	10456000	9564600	12979000	10817000	2	Q99661;B7Z6Q6;Q99661-2;B7Z7M6;Q8N4N8	Q99661;B7Z6Q6;Q99661-2;B7Z7M6;Q8N4N8	Kinesin-like protein KIF2C;Kinesin-like protein KIF2B	KIF2C;KIF2B	5	10.142	10.2329	0.991118	1.00896	0.00530786	0.971378	1.72959e-05
120260000	117680000	76742000	90190000	121420000	114500000	160980000	142560000	130730000	152210000	126250000	89370000	256030000	191410000	159250000	180040000	160930000	155950000	6	B7Z6Z4;G3V1V0;G8JLA2;J3KND3;P60660;P60660-2;F8W1R7;F8VPF3;G3V1Y7;F8W180;F8VZU9;P14649;F8W1I5;H0YI43;F8VXL3	B7Z6Z4;G3V1V0;G8JLA2;J3KND3;P60660;P60660-2;F8W1R7;F8VPF3;G3V1Y7;F8W180;F8VZU9	Myosin light polypeptide 6	MYL6	15	1.25173	1.72226	0.726797	1.3759	0.0627424	0.0222804	0.00120155
4225300	4703200	6468400	6961800	4233600	4524700	1	3741400	3916400	4051800	3633800	4464000	1	1	1	1	4744000	5111000	3	Q93009;B7Z815;F5H8E5;H3BND8;F5H2X1	Q93009;B7Z815;F5H8E5;H3BND8	Ubiquitin carboxyl-terminal hydrolase 7;Ubiquitin carboxyl-terminal hydrolase	USP7	5	0.636546	0.316708	2.00988	0.497541	0.0470463	0.209753	0.0116615
1	1	1	1	1	1	1	1	1	1	1	1	1	1	1	1	1	1	2	Q9Y4L1;E9PL22;E9PJ21;B7Z909	Q9Y4L1;E9PL22;E9PJ21;B7Z909	Hypoxia up-regulated protein 1	HYOU1	4	1	1	1	1	#DIV/0!	#DIV/0!	#DIV/0!
9434100	8256800	5229900	1	20012000	15702000	59315000	22689000	18462000	12796000	1	1	78847000	241370000	19794000	23964000	24918000	54745000	2	P61204;P84077;B7ZB63;F5H423;H0YGG7	P61204;P84077;B7ZB63;F5H423;H0YGG7	ADP-ribosylation factor 3;ADP-ribosylation factor 1	ARF3;ARF1	5	1.93165	7.56612	0.255303	3.91692	0.35624	0.156058	0.0957235
16980000	16024000	18926000	49895000	8578900	10039000	2024000	1	1	1820100	1	3142900	3665100	2578400	2088100	2159800	2023600	2068600	7	Q8TCU4;B8ZZJ3;Q8TCU4-2;Q8TCU4-3;A6NMY3;H7C1D9	Q8TCU4;B8ZZJ3;Q8TCU4-2;Q8TCU4-3	Alstrom syndrome protein 1	ALMS1	6	0.0580109	0.121083	0.4791	2.08725	0.012403	0.0648879	0.0173143
10401000	1	13119000	11267000	9394200	7633500	9167100	9595900	10195000	10703000	8386200	9203400	14900000	10301000	10538000	10451000	9069200	10714000	2	B8ZZN6;P63165;B9A032;P63165-2;B8ZZ67;B8ZZJ0	B8ZZN6;P63165;B9A032;P63165-2;B8ZZ67;B8ZZJ0	Small ubiquitin-related modifier 1	SUMO1	6	1.10491	1.27325	0.867786	1.15236	0.645776	0.13071	0.276907
17351000	14877000	6337800	6372900	58546000	65359000	57343000	46752000	33981000	35496000	1	11973000	180100000	161220000	48089000	46433000	64364000	95161000	8	P54819;F8W1A4;P54819-2;P54819-5;P54819-3;F8VZG5;P54819-6;F8VY04;G3V213;P54819-4;F8VPP1	P54819;F8W1A4;P54819-2;P54819-5;P54819-3;F8VZG5;P54819-6;F8VY04;G3V213;P54819-4	Adenylate kinase 2, mitochondrial	AK2	11	1.09892	3.52614	0.311648	3.20875	0.845936	0.0226181	0.021752
13066000	16180000	9489400	10961000	14855000	15910000	20167000	20034000	23230000	20797000	21070000	21363000	25204000	23571000	22487000	25573000	23767000	23053000	2	Q15370-2;I3L0M9;Q15370;B8ZZU8	Q15370-2;I3L0M9;Q15370;B8ZZU8	Transcription elongation factor B polypeptide 2	TCEB2	4	1.57418	1.78539	0.881703	1.13417	8.42311e-05	0.00200808	6.11242e-06
1	22187000	1	1	46536000	62109000	23924000	31307000	12891000	14839000	1	1	44798000	46690000	28410000	30203000	26069000	39230000	4	P40925-3;P40925;P40925-2;B9A041;B8ZZ51;C9JF79;C9JRL4	P40925-3;P40925;P40925-2;B9A041;B8ZZ51;C9JF79	Malate dehydrogenase, cytoplasmic;Malate dehydrogenase	MDH1	7	0.634103	1.64639	0.385149	2.5964	0.527387	0.00559347	0.253221
69557000	49171000	54354000	55880000	60569000	67227000	98981000	86875000	129780000	92689000	154000000	183590000	99453000	77127000	79185000	89070000	65439000	68065000	8	Q16891;Q16891-4;Q16891-2;Q16891-3;B9A067;C9J406;H7C463;D6RAW4	Q16891;Q16891-4;Q16891-2;Q16891-3;B9A067;C9J406;H7C463	Mitochondrial inner membrane protein	IMMT	8	2.09082	1.34079	1.55939	0.641278	0.00240547	0.0229968	0.00802754
1	1	1	1	9444000	1	1	1	1	1	1	1	9636200	1	1	1	1	1	2	Q7L1Q6-3;Q7L1Q6-4;Q7L1Q6;Q7L1Q6-2;C9IZ80;H0Y503	Q7L1Q6-3;Q7L1Q6-4;Q7L1Q6;Q7L1Q6-2;C9IZ80;H0Y503	Basic leucine zipper and W2 domain-containing protein 1	BZW1	6	6.35324e-07	1.02035	6.22652e-07	1.60603e+06	0.340893	0.340893	0.988915
38157000	60120000	62099000	64646000	71920000	102490000	76380000	66723000	36506000	47304000	76727000	32205000	70893000	107200000	37692000	53225000	55865000	37541000	7	C9IZE4;Q15008;Q15008-2;E9PHI9;C9J0E9;C9J7B7;H7C531	C9IZE4;Q15008;Q15008-2;E9PHI9	26S proteasome non-ATPase regulatory subunit 6	PSMD6	7	0.840806	0.907328	0.926684	1.07912	0.390016	0.747978	0.661286
232370000	208660000	314880000	307910000	152160000	138940000	139430000	98789000	132290000	100910000	177460000	166770000	38406000	34476000	68887000	68218000	80416000	77681000	19	Q5VX20;Q16875;Q16875-2;Q5W015;F2Z2I2;B7Z955;Q16875-3;F5H5L1;H0Y483;Q16877;Q66S35;B7Z5C3;Q64EX5;Q5XLC2;Q4VBA9;Q9H178	Q5VX20;Q16875;Q16875-2;Q5W015;F2Z2I2;B7Z955;Q16875-3	6-phosphofructo-2-kinase/fructose-2,6-bisphosphatase 3;6-phosphofructo-2-kinase;Fructose-2,6-bisphosphatase	PFKFB3	16	0.601991	0.271665	2.21593	0.451277	0.0223843	0.000739907	0.000398894
3387600	3364900	2596200	2466200	5113000	4323600	6379600	7256700	6753900	7821600	9128500	9121300	8605400	10239000	8694000	7500600	8652300	8741300	1	G5E9Q6;P35080;P35080-2;C9JQ45;C9J0J7;C9J712	G5E9Q6;P35080;P35080-2;C9JQ45;C9J0J7;C9J712	Profilin;Profilin-2	PFN2	6	2.18627	2.46724	0.88612	1.12851	5.92774e-05	0.126773	2.56365e-06
20816000	21363000	18699000	22430000	20433000	23735000	18391000	19129000	16428000	16510000	16712000	14372000	28015000	22878000	22125000	17809000	18626000	18093000	4	O43324;C9J1V9;D6RBD7;O43324-2;H0YAL7;D6RCQ0	O43324;C9J1V9;D6RBD7;O43324-2;H0YAL7;D6RCQ0	Eukaryotic translation elongation factor 1 epsilon-1	EEF1E1	6	0.796558	1.00055	0.796121	1.25609	0.00133233	0.0327251	0.994838
247450000	223860000	61867000	55470000	503510000	449010000	456720000	426650000	250330000	391160000	77413000	44874000	873000000	969430000	647270000	530080000	649380000	583140000	17	P12277;G3V4N7;H0YJG0;P06732;G3V461;H0YJK0;F8WCN3;E9PCP8;J3KQ93;G3V2I1;H0YJJ7	P12277	Creatine kinase B-type	CKB	11	1.06877	2.75914	0.387354	2.58162	0.871459	0.00167035	0.0015013
4941700000	4525700000	1504000000	1508800000	235060000	220520000	1111600000	1026300000	581660000	588340000	943160000	796540000	230350000	235020000	219960000	251390000	460490000	526080000	8	P0C0S8;Q9BTM1;Q96KK5;Q99878;Q9BTM1-2;Q6FI13;P20671;Q16777;H0YFX9;P16104;Q96QV6;Q71UI9-5	P0C0S8;Q9BTM1;Q96KK5;Q99878;Q9BTM1-2;Q6FI13;P20671;Q16777;H0YFX9;P16104;Q96QV6	Histone H2A type 1;Histone H2A.J;Histone H2A type 1-H;Histone H2A type 1-J;Histone H2A type 2-A;Histone H2A type 1-D;Histone H2A type 2-C;Histone H2A;Histone H2A.x;Histone H2A type 1-A	HIST1H2AG;H2AFJ;HIST1H2AH;HIST1H2AJ;HIST2H2AA3;HIST1H2AD;HIST2H2AC;H2AFX;HIST1H2AA	12	0.390205	0.14868	2.62446	0.381031	0.154946	0.00065345	0.056519
4928800	4697200	4778700	1	6091700	6386400	8063900	9143400	7491700	7434800	7227500	7021300	9343100	7516200	7549300	7905000	8365400	8868600	2	Q15003;E9PHA2;C9J470;B4E189;C9JZP1	Q15003;E9PHA2;C9J470;B4E189;C9JZP1	Condensin complex subunit 2	NCAPH	5	1.72536	1.8431	0.936122	1.06824	0.0084417	0.255861	0.00338918
12325000	12453000	9460600	8558900	11170000	11917000	15849000	17427000	16264000	18263000	14000000	16044000	24988000	28411000	23997000	30117000	17099000	30249000	8	F5HFY4;Q99733;C9J6D1;C9JZI7;E9PKT8;E9PNJ7;E9PS34;E9PJJ2;E9PNW0;A8MXH2;E9PP22;E9PKI2;C9J1B1;H0YCI4	F5HFY4;Q99733;C9J6D1;C9JZI7;E9PKT8;E9PNJ7;E9PS34;E9PJJ2;E9PNW0;A8MXH2;E9PP22;E9PKI2	Nucleosome assembly protein 1-like 4	NAP1L4b;NAP1L4	14	1.48513	2.35049	0.631838	1.58269	0.000134319	0.00119671	4.11315e-05
3074000	2605200	2688700	2749300	2778200	2868100	3275900	3902400	3382400	3397900	3633200	3619400	3236900	1	2979700	3589200	3219300	3432000	1	C9J6P4;Q7Z2W4;Q7Z2W4-2;Q7Z2W4-3	C9J6P4;Q7Z2W4;Q7Z2W4-2;Q7Z2W4-3	Zinc finger CCCH-type antiviral protein 1	ZC3HAV1	4	1.26532	0.981722	1.28888	0.775868	7.16555e-05	0.189494	0.929016
727890	689990	1	754360	906130	850080	2516700	2562300	3335900	2159400	3261600	2940300	1472400	1656100	3715000	2114200	2523700	2092700	1	Q8WWK9;Q8WWK9-5;E9PD90;Q8WWK9-4;C9J7Y4	Q8WWK9;Q8WWK9-5;E9PD90;Q8WWK9-4;C9J7Y4	Cytoskeleton-associated protein 2	CKAP2	5	4.27044	3.45533	1.2359	0.809128	3.28625e-06	0.188401	0.00108047
2441400	1	1	1	1	1	3404700	2805700	3005100	2879800	1	3013100	3510400	1	4018000	1	3071400	3336100	2	Q05682;Q05682-2;Q05682-6;Q05682-3;E7EX44;F5H1Z9;Q05682-4;E9PGZ1;Q05682-5;C9J813	Q05682;Q05682-2;Q05682-6;Q05682-3;E7EX44;F5H1Z9;Q05682-4;E9PGZ1;Q05682-5;C9J813	Caldesmon	CALD1	10	6.1884	5.70815	1.08414	0.922394	0.00896977	0.833096	0.0476741
3547700000	3671500000	5359800000	4841200000	3241100000	3946700000	2328300000	2542300000	2312800000	2653700000	2182800000	2376400000	2009400000	2048200000	2535400000	2644400000	2155100000	2011700000	19	P08865;C9J9K3;A6NE09;C9JQR9	P08865;C9J9K3;A6NE09	40S ribosomal protein SA	RPSA;RPSAP58	4	0.585025	0.544709	1.07401	0.931086	0.000569533	0.247992	0.000370067
298180000	323150000	315950000	356190000	146130000	224500000	55795000	48052000	52646000	59903000	64609000	58433000	38538000	41651000	26234000	39085000	57034000	47916000	6	Q16629;C9JAB2;Q16629-4;Q16629-2;Q16629-3;F8WEA1	Q16629;C9JAB2;Q16629-4;Q16629-2;Q16629-3	Serine/arginine-rich splicing factor 7	SRSF7	6	0.203977	0.150507	1.35527	0.737861	4.02655e-05	0.0117308	2.43752e-05
17295000	16498000	15115000	15149000	12941000	14800000	1	1	1	1	1	1	1	1	1	1	1	1	2	C9JAJ9	C9JAJ9		RBBP7	1	6.53609e-08	6.53609e-08	1	1	2.45387e-10	#DIV/0!	2.45387e-10
1	1	1	1	5152400	3893400	3110000	4896200	2532600	4802300	1	1	12393000	9761500	3352000	1	6507600	6990500	1	P18085;C9JAK5;C9JPM4	P18085;C9JAK5;C9JPM4	ADP-ribosylation factor 4	ARF4	3	1.69594	4.3119	0.393315	2.54249	0.443845	0.0786387	0.0349677
2676700	2100000	1	1	2598000	3499100	32048000	24675000	34196000	36933000	54432000	33761000	23634000	32551000	41512000	48218000	33879000	28562000	2	Q9Y241-2;C9JNU6;Q9Y241;C9JAW5;A8MV81	Q9Y241-2;C9JNU6;Q9Y241;C9JAW5;A8MV81	HIG1 domain family member 1A;HIG1 domain family member 1C	HIGD1A;HIGD1C	5	19.8684	19.1613	1.0369	0.96441	8.11107e-06	0.818471	4.33599e-06
15409000	19065000	34506000	26196000	14376000	26567000	16256000	12849000	12584000	11834000	9150900	1	14249000	16278000	10325000	14272000	1	1	4	Q9NYK5-2;Q9NYK5;C9JG87	Q9NYK5-2;Q9NYK5;C9JG87	39S ribosomal protein L39, mitochondrial	MRPL39	3	0.460435	0.404969	1.13696	0.879537	0.0107034	0.746102	0.0115241
9825500	15838000	19347000	26303000	11885000	15362000	11139000	9572000	11009000	8650800	8063900	8310300	12551000	1	10410000	12179000	8801400	11784000	4	C9JJ19;P82930	C9JJ19;P82930	28S ribosomal protein S34, mitochondrial	MRPS34	2	0.575738	0.565393	1.0183	0.982032	0.0176079	0.934548	0.0429719
59721000	51860000	55848000	13239000	23942000	18900000	30884000	27268000	29772000	24204000	40267000	50946000	56358000	67012000	61552000	100090000	41954000	57145000	2	G3V325;C9JU26;P56134;F5H4H2;P56134-2;P56134-3;C9JJT5;P56134-4	G3V325;C9JU26;P56134;F5H4H2;P56134-2;P56134-3;C9JJT5;P56134-4	ATP synthase subunit f, mitochondrial	PTCD1;ATP5J2	8	0.909762	1.71854	0.529381	1.889	0.728025	0.00717553	0.0442647
1	1	1	1	8976200	12936000	17065000	11902000	18958000	19335000	10410000	1	50796000	1	22097000	15948000	38435000	24517000	2	P58546;C9JL85	P58546;C9JL85	Myotrophin	MTPN	2	3.5446	6.92733	0.511684	1.95433	0.0351462	0.144794	0.0172062
488500000	533820000	480150000	474410000	476990000	496910000	366470000	362310000	348300000	360270000	332380000	338040000	316450000	386270000	352080000	398400000	291610000	313580000	6	P83731;C9JNW5;C9JXB8	P83731;C9JNW5;C9JXB8	60S ribosomal protein L24	RPL24	3	0.714309	0.697575	1.02399	0.976572	1.2471e-07	0.665016	1.98665e-05
6627800	7322700	6243300	5520900	5805200	8086400	10319000	10758000	11873000	11033000	9923300	12093000	10446000	10520000	12799000	11334000	12134000	12770000	2	F8WAR4;C9JRZ6;Q9NX63;G3V1K1;F8WD73	F8WAR4;C9JRZ6;Q9NX63;G3V1K1;F8WD73	Coiled-coil-helix-coiled-coil-helix domain-containing protein 3, mitochondrial	CHCHD3	5	1.66638	1.76747	0.942807	1.06066	7.94687e-06	0.257713	5.89953e-06
621270000	574310000	196850000	212850000	25866000	29241000	203620000	132250000	72938000	69350000	188200000	104270000	1	1	1	1	73763000	59212000	10	B4DR52;U3KQK0;Q5QNW6-2;O60814;P58876;P62807;Q5QNW6;Q93079;Q99877;Q99879;P57053	B4DR52;U3KQK0;Q5QNW6-2;O60814;P58876;P62807;Q5QNW6;Q93079;Q99877;Q99879;P57053	Histone H2B;Histone H2B type 1-K;Histone H2B type 1-D;Histone H2B type 1-C/E/F/G/I;Histone H2B type 2-F;Histone H2B type 1-H;Histone H2B type 1-N;Histone H2B type 1-M;Histone H2B type F-S	HIST2H2BF;HIST1H2BK;HIST1H2BD;HIST1H2BC;HIST1H2BH;HIST1H2BN;HIST1H2BM;H2BFS	11	0.464126	0.0800868	5.79528	0.172554	0.204641	0.00301054	0.0396864
50116000	46742000	30033000	33857000	57563000	48409000	127010000	105600000	95723000	90416000	119320000	85348000	122490000	157340000	110210000	124070000	122310000	146540000	7	P18754-2;P18754;C9JW69;C9JQZ4;C9J3R0;C9JMJ4;C9JRH2	P18754-2;P18754;C9JW69;C9JQZ4;C9J3R0;C9JMJ4;C9JRH2	Regulator of chromosome condensation	RCC1	7	2.33735	2.93551	0.796231	1.25592	2.19647e-05	0.0226669	1.24817e-06
1	1	4187400	8368700	1	3213100	1	1	1	1	2579600	2815200	1	1	2558700	2707000	1	1	2	Q13769;F8WCP5;C9JXG5;H7C072;H7C441;C9JCL9;F5GZF3;C9JXU6	Q13769;F8WCP5;C9JXG5;H7C072;H7C441;C9JCL9;F5GZF3;C9JXU6	THO complex subunit 5 homolog	THOC5	8	0.34211	0.333923	1.02452	0.97607	0.271378	0.978952	0.264204
1840000	1	1	1	1	2802300	3994100	3399800	5324900	4434100	5721800	5421400	3085800	3512700	5561500	4684800	4876600	4836300	2	O60716;O60716-2;O60716-3;C9JZR2;O60716-5;O60716-9;O60716-10;O60716-11;O60716-13;O60716-17;O60716-18;O60716-19;O60716-21;O60716-4;O60716-6;O60716-7;O60716-8;O60716-12;O60716-14;O60716-15;O60716-16;O60716-20;O60716-22;O60716-23;O60716-24;O60716-25;O60716-26;O60716-27;O60716-29;E9PRE2;H0YC95	O60716;O60716-2;O60716-3;C9JZR2;O60716-5;O60716-9;O60716-10;O60716-11;O60716-13;O60716-17;O60716-18;O60716-19;O60716-21;O60716-4;O60716-6;O60716-7;O60716-8;O60716-12;O60716-14;O60716-15;O60716-16;O60716-20;O60716-22;O60716-23;O60716-24;O60716-25;O60716-26;O60716-27;O60716-29;E9PRE2;H0YC95	Catenin delta-1	CTNND1	31	6.09527	5.7208	1.06546	0.938564	9.26024e-05	0.599649	0.000179171
2555800	8688700	9746200	11217000	19246000	27587000	12609000	13538000	1	1	1	1	29908000	25532000	5728500	4439100	13751000	8038500	4	CON__A2I7N3	CON__A2I7N3			1	0.330804	1.10572	0.299175	3.34253	0.189248	0.00403649	0.851351
1774800	1	1	1	1	1	2142200	1	1	1	1	1	1	1	2378900	1	1783900	2275300	3	CON__ENSEMBL:ENSBTAP00000007350;CON__P01030	CON__ENSEMBL:ENSBTAP00000007350;CON__P01030			2	1.20701	3.6275	0.332739	3.00536	0.363217	0.365388	0.299643
9258600	8251800	3054200	3146600	12609000	14331000	12101000	12337000	10344000	13148000	7008200	5553100	19902000	35752000	13308000	17436000	26983000	22973000	6	Q16181;E7EPK1;E7ES33;Q16181-2;G3V1Q4;Q5JXL7;H0YFF6;H0Y3Y4;Q6ZU15;F5GZE5	Q16181;E7EPK1;E7ES33;Q16181-2;G3V1Q4;Q5JXL7	Septin-7	SEPT7;DKFZp586I031	10	1.19427	2.69202	0.443634	2.25411	0.491727	0.00450425	0.00344642
188100000	191070000	91465000	105190000	372280000	381430000	362050000	306510000	248230000	157270000	49611000	123170000	352170000	400220000	302260000	303150000	386040000	294900000	27	CON__ENSEMBL:ENSBTAP00000024146;P01023;P20742;P20742-2;F8W7L3	CON__ENSEMBL:ENSBTAP00000024146			5	0.937802	1.53342	0.611574	1.63512	0.883695	0.0423534	0.0683828
11243000	13989000	18663000	13740000	8324200	12010000	14762000	12704000	16973000	13849000	15695000	15259000	9148000	10154000	14568000	9193000	14683000	15219000	2	CON__ENSEMBL:ENSBTAP00000024462;CON__ENSEMBL:ENSBTAP00000024466	CON__ENSEMBL:ENSBTAP00000024462;CON__ENSEMBL:ENSBTAP00000024466			2	1.14458	0.935818	1.22308	0.817608	0.243468	0.0255813	0.671616
22126000	21943000	24306000	23900000	17189000	19919000	34025000	32170000	33580000	41318000	41039000	82054000	24856000	19882000	30498000	34311000	71801000	38173000	1	CON__ENSEMBL:ENSBTAP00000031900	CON__ENSEMBL:ENSBTAP00000031900			1	2.04189	1.69668	1.20347	0.830934	0.0414341	0.478236	0.133962
3134800	4196200	1	1	1	1	1	1	174300000	198500000	10809000	155590000	109980000	169540000	233660000	243830000	185570000	176540000	7	CON__Q14533;Q14533;CON__O43790;O43790;CON__Q6NT21;P78385;CON__P78385;CON__Q61726;U3KPR1;F5GYI5;A6NCN2	CON__Q14533;Q14533;CON__O43790;O43790;CON__Q6NT21;P78385;CON__P78385	Keratin, type II cuticular Hb1;Keratin, type II cuticular Hb6;Keratin, type II cuticular Hb3	KRT81;KRT86;KRT83	11	73.5505	152.656	0.481806	2.07552	0.0752284	0.0151658	0.000265956
1	14748000	1	1	1	1	1	1	1	1	1	1	1	1	1	17985000	1	1	3	CON__O76014;CON__O76015;O76015;O76014;CON__O76013;O76013;CON__A2AB72;O76013-2;CON__A2VCT4	CON__O76014;CON__O76015;O76015;O76014;CON__O76013;O76013;CON__A2AB72;O76013-2	Keratin, type I cuticular Ha8;Keratin, type I cuticular Ha7;Keratin, type I cuticular Ha6	KRT38;KRT37;KRT36	9	4.06835e-07	1.21949	3.33611e-07	2.9975e+06	0.363217	0.363217	0.903699
36844000	44209000	84811000	74664000	34769000	29177000	115650000	109620000	103730000	66289000	98058000	27496000	89622000	113990000	80263000	90048000	77417000	85112000	2	CON__P00711	CON__P00711			1	1.71063	1.7619	0.970903	1.02997	0.0663519	0.855414	0.019357
28823000	31589000	33689000	29435000	1	27855000	34060000	29499000	1	36518000	1	1	14028000	35675000	29249000	15851000	45823000	54671000	4	CON__P00735	CON__P00735			1	0.66105	1.29002	0.512435	1.95147	0.288076	0.286018	0.492824
11046000000	17388000000	14130000000	17212000000	15416000000	17521000000	15489000000	16562000000	18180000000	21501000000	22411000000	25178000000	19958000000	24794000000	30293000000	34090000000	18359000000	19592000000	11	CON__P00761;J3KQC6;Q9BYE2;E9PRA0;F8WAJ3;Q9BYE2-2;Q9BYE2-5;E9PIJ5;Q9BYE2-3	CON__P00761			9	1.28699	1.58647	0.811233	1.23269	0.0150658	0.210831	0.0172005
7378700	6880600	3342800	1	26208000	22866000	7550900	5881300	6566800	6520600	2224200	3148100	6903100	6872100	7266000	7028000	7094300	4530500	2	CON__P00978	CON__P00978			1	0.478311	0.595326	0.803444	1.24464	0.316965	0.15061	0.37673
12848000	11921000	1	1	8459100	9485800	16732000	13951000	17761000	15064000	1	8573900	18389000	21360000	17143000	19441000	16080000	14732000	7	CON__P01044-1;CON__Q2KJ62	CON__P01044-1;CON__Q2KJ62			2	1.68755	2.50843	0.672751	1.48643	0.280063	0.0569565	0.00756788
84102000	79453000	38787000	55870000	65371000	72927000	164340000	143310000	124410000	97566000	39649000	51450000	142500000	104910000	103760000	140290000	179370000	170480000	7	CON__P01045-1;P01042;P01042-2;P01042-3	CON__P01045-1			4	1.56547	2.12179	0.737808	1.35537	0.124618	0.295909	0.00218986
618980000	593510000	602660000	538610000	745050000	794200000	755230000	743350000	770110000	856740000	675310000	737100000	1360900000	1205800000	802010000	643150000	927410000	958150000	8	CON__P01966;P69905;G3V1N2;P02008	CON__P01966;P69905;G3V1N2	Hemoglobin subunit alpha	HBA1;HBA2	4	1.16564	1.51487	0.769462	1.29961	0.134802	0.117509	0.0293392
35226000	41182000	13720000	17238000	34170000	34246000	20411000	20858000	113950000	109950000	53692000	43490000	33528000	37648000	22103000	20780000	28574000	25966000	17	CON__P02533;P02533;CON__Q6IFX2;F5GWP8;CON__A2A4G1;CON__P19001;K7ESE1;CON__Q99456;Q99456;CON__P05784;K7ENV3;CON__Q7Z3Y9;Q7Z3Y9;P05783;F8VZY9;CON__Q8N1A0;Q8N1A0;Q8N1A0-2;K7EMS3;CON__Q61782	CON__P02533;P02533	Keratin, type I cytoskeletal 14	KRT14	20	2.06137	0.959137	2.14919	0.465292	0.208733	0.160327	0.653897
30442000000	28278000000	26890000000	29602000000	29441000000	28605000000	36810000000	35526000000	40108000000	40338000000	40305000000	39855000000	57752000000	54618000000	44461000000	43680000000	31596000000	31770000000	18	CON__P02662	CON__P02662			1	1.34448	1.52303	0.882767	1.1328	0.000235726	0.367967	0.0192882
8760100000	10146000000	12258000000	11806000000	8169300000	8523000000	12080000000	11948000000	12110000000	12586000000	12397000000	12132000000	13232000000	13285000000	11181000000	11632000000	8667600000	8973000000	18	CON__P02663;REV__Q9C037;REV__Q9C037-2;REV__Q9C037-3;REV__H7C0Q6	CON__P02663			5	1.22779	1.12249	1.09381	0.914237	0.0239445	0.277817	0.219381
6270700000	6894700000	6136600000	6840900000	5314100000	5464500000	6986100000	7993100000	7971600000	8912300000	7752900000	8081600000	7293800000	7287600000	9847000000	9572200000	5684900000	5729300000	9	CON__P02666	CON__P02666			1	1.29187	1.23004	1.05027	0.95214	0.00205307	0.594936	0.0631701
2529300000	2154700000	3401100000	3027200000	2341000000	2198200000	3488800000	4244000000	4237900000	4776300000	2772100000	3168900000	4820100000	4039300000	4372600000	4741800000	2920400000	3400400000	8	CON__P02668	CON__P02668			1	1.44957	1.55222	0.93387	1.07081	0.00566352	0.281778	0.00258822
1781600000	1776900000	1921600000	1808800000	1193300000	1325600000	1976700000	2110200000	2052100000	1941100000	1873700000	2160100000	1869800000	1771900000	1785400000	1672500000	1296900000	1339100000	14	CON__P02754	CON__P02754			1	1.23513	0.992639	1.24429	0.803672	0.0263951	0.0131393	0.789901
9343700000	9439400000	8241100000	8231400000	20155000000	22535000000	24665000000	22478000000	14305000000	14298000000	10067000000	10259000000	17434000000	16852000000	18344000000	18377000000	15757000000	15461000000	49	CON__P02769;CON__P02768-1;P02768;B7WNR0;D6RHD5;H0YA55;C9JKR2;P02768-2;H7C013	CON__P02769			9	1.23255	1.31149	0.939809	1.06405	0.552497	0.684571	0.254424
991350	739100	413810	472590	1918100	2027300	689590	701310	36422000	36234000	1029800	1037800	1520900	2022400	1	1	1	1	26	CON__P04259;CON__O95678;O95678;CON__Q8VED5	CON__P04259			4	11.5988	0.539953	21.4812	0.0465523	0.19175	0.175775	0.390282
1601000000	1558200000	1790500000	1728900000	2116000000	1892100000	1905900000	1736000000	1859500000	2142000000	2791900000	2996300000	2124000000	2191900000	2622300000	3226500000	2151400000	2215900000	2	E7EQ64;CON__P07477;P07477;P07478;Q8NHM4;H0Y8D1	E7EQ64;CON__P07477;P07477;P07478;Q8NHM4;H0Y8D1	Trypsin-1;Alpha-trypsin chain 1;Alpha-trypsin chain 2;Trypsin-2;Putative trypsin-6	PRSS1;PRSS2;TRY6	6	1.25685	1.35982	0.924277	1.08193	0.0317992	0.576489	0.0257308
1	1	1	1	1	3297700	1	1	78984000	81364000	1	1649300	1	1	1	1	1	1	6	CON__P08727;P08727;C9JM50	CON__P08727;P08727;C9JM50	Keratin, type I cytoskeletal 19	KRT19	3	49.1243	1.81945e-06	2.69996e+07	3.70377e-08	0.18033	0.169357	0.363217
107580000	139590000	38178000	50703000	174750000	173700000	68737000	47553000	329880000	376310000	94014000	99947000	162620000	147570000	28514000	38993000	40105000	41506000	22	CON__P08779;P08779;CON__Q3ZAW8;CON__Q9Z2K1;K7ENW6	CON__P08779;P08779	Keratin, type I cytoskeletal 16	KRT16	5	1.48494	0.671011	2.21298	0.451879	0.522781	0.281964	0.291964
4123200000	4035500000	2164400000	1711000000	9130700000	10567000000	12893000000	11791000000	10626000000	10262000000	2684900000	2935500000	18355000000	18147000000	12011000000	11985000000	14239000000	15124000000	18	CON__P12763;P02765;C9JV77	CON__P12763			3	1.61328	2.83189	0.569684	1.75536	0.365191	0.0193091	0.00239211
3380200000	3272900000	1968800000	2163000000	1426900000	1545900000	2581200000	2424700000	4608700000	4402100000	3354100000	3451600000	4050900000	4044400000	2392500000	2455200000	1791000000	1819600000	31	CON__P13645;P13645;CON__Q7Z3Y7;Q7Z3Y7;CON__Q7Z3Y8;Q7Z3Y8;CON__Q148H6;CON__Q2M2I5;Q2M2I5;CON__Q7Z3Z0;Q7Z3Z0	CON__P13645;P13645	Keratin, type I cytoskeletal 10	KRT10	11	1.51351	1.20322	1.25788	0.79499	0.126148	0.368498	0.00269424
1	1	1	1	1	1	1	1	120200000	130990000	1	1	1	1	1	1	1	1	15	CON__P13646-1	CON__P13646-1			1	4.1865e+07	1	4.1865e+07	2.38863e-08	0.17518	0.17518	#DIV/0!
196480000	191220000	175930000	113070000	125590000	96584000	66661000	70841000	275230000	426170000	116980000	118310000	209740000	184030000	102020000	84483000	93200000	111730000	23	CON__P13647;P13647;F8W0C6;H0YI76;H0YIN9;F8VV57	CON__P13647;P13647	Keratin, type II cytoskeletal 5	KRT5	6	1.19504	0.873541	1.36804	0.730971	0.68093	0.546703	0.22534
144650000	156220000	105680000	93270000	382490000	304270000	269550000	254610000	268160000	225060000	88953000	88907000	490500000	486510000	318400000	370210000	411450000	331280000	18	CON__P15497	CON__P15497			1	1.0073	2.02966	0.49629	2.01495	0.986633	0.00319318	0.0178885
3533800	3850700	2653400	2276500	9377600	8641600	11059000	13340000	10288000	12679000	6222100	1	46876000	17795000	15714000	12043000	15429000	18719000	4	CON__P17690;P02749;J3KS17	CON__P17690;P02749;J3KS17	Beta-2-glycoprotein 1	APOH	3	1.76663	4.1728	0.423367	2.36202	0.280278	0.0746277	0.0347602
2543600	2162700	1	2035800	2389200	1930200	2595200	2901600	4234000	4081900	4701800	4028600	3423300	2824800	4309400	4103700	5233200	7849600	2	CON__P17697	CON__P17697			1	2.03798	2.50816	0.81254	1.23071	0.0228596	0.212971	0.0205761
1841500	719090	6785400	1240200	8043900	1807700	7543900	7496600	529450000	513130000	6608500	2645400	1	1	9202900	2592200	1	13408000	15	CON__P19013;P19013;F5H8K9;F8VZR6;F8VX05	CON__P19013;P19013;F5H8K9	Keratin, type II cytoskeletal 4	KRT4	5	52.2011	1.23316	42.3311	0.0236233	0.168682	0.169258	0.774591
8793100	9806200	4148300	4419400	16089000	18336000	29189000	22053000	22441000	23191000	6057200	7212000	46670000	64159000	26887000	34632000	52141000	48949000	6	CON__P28800	CON__P28800			1	1.78827	4.43951	0.402809	2.48257	0.236151	0.0144578	0.00047624
1051100000	861660000	686840000	583960000	2962400000	2776100000	2657300000	2424300000	1659900000	1832600000	724950000	813970000	4125100000	4097300000	2559100000	2721800000	3968400000	4276300000	28	CON__P34955;Q8NI35;Q8NI35-2;Q8NI35-3;Q8NI35-4;Q8NI35-5	CON__P34955			6	1.13348	2.43755	0.465009	2.1505	0.797546	0.00876805	0.00188075
181830000	183820000	89103000	71452000	195050000	229020000	67873000	49656000	1031300000	1003700000	198400000	167040000	151390000	140460000	68211000	61408000	107750000	70591000	26	CON__P48668;P48668;CON__P02538;P02538	CON__P48668;P48668;CON__P02538;P02538	Keratin, type II cytoskeletal 6C;Keratin, type II cytoskeletal 6A	KRT6C;KRT6A	4	2.64973	0.631196	4.19794	0.238212	0.277792	0.175922	0.0505257
13275000000	13953000000	14665000000	15068000000	13276000000	13350000000	7144500000	7242500000	6139500000	6363200000	5052700000	4827800000	11314000000	12276000000	6803400000	6972300000	7479300000	6945300000	28	CON__P60712;P60709;Q6S8J3;E7EVS6;G5E9R0;C9JZR7;A5A3E0;C9JTX5;P0CG38;Q9BYX7;P0CG39	CON__P60712;P60709	Actin, cytoplasmic 1;Actin, cytoplasmic 1, N-terminally processed	ACTB	11	0.439903	0.619598	0.709982	1.40849	1.14292e-05	0.0193407	0.00593342
166990000	13358000	49826000	17104000	54793000	53699000	16002000	16234000	15692000	10100000	16785000	17213000	34028000	17580000	17838000	19386000	14647000	23587000	2	CON__P62894;P99999;C9JFR7	CON__P62894;P99999;C9JFR7	Cytochrome c	CYCS	3	0.258667	0.357158	0.724238	1.38076	0.108293	0.103138	0.121124
12303000	6465000	2139500	2008600	8703400	8467100	8243800	32267000	38748000	37145000	1	1	12055000	9006100	44277000	27320000	42031000	42651000	3	CON__P81644	CON__P81644			1	2.90381	4.42392	0.656387	1.52349	0.216992	0.399402	0.0248158
7991100	10531000	1	1	21854000	20809000	2969800	7803100	33343000	38461000	9128700	6767600	2203000	6128100	6895300	2825200	6189200	6438300	12	CON__Q04695;Q04695;CON__Q9QWL7;K7EPJ9;CON__Q99PS0	CON__Q04695;Q04695;CON__Q9QWL7;K7EPJ9	Keratin, type I cytoskeletal 17	KRT17	5	1.60943	0.501415	3.20978	0.311548	0.544976	0.136054	0.22512
37268000	1238200	1	1	1	1	1	1	1	1	1	1	5842300	1	1	1	2523600	1	1	CON__Q05B55	CON__Q05B55			1	1.55819e-07	0.217261	7.17197e-07	1.39432e+06	0.346171	0.214246	0.387106
217630000	140210000	66810000	60016000	328510000	260790000	542510000	487540000	77656000	81518000	102510000	45583000	163690000	159700000	269170000	234370000	101100000	77142000	28	CON__Q0IIK2;CON__Q29443;P02788;E7ER44;E7EQB2;P02788-2	CON__Q0IIK2;CON__Q29443			6	1.24521	0.935944	1.33044	0.751633	0.685108	0.599929	0.881127
8087500	7159400	3839800	4432800	11173000	16867000	16729000	15667000	16615000	13038000	5705600	6776300	46554000	40225000	19558000	15031000	35318000	25672000	4	CON__Q0V8M9;Q06033;Q06033-2;E7ET33	CON__Q0V8M9			4	1.44553	3.53685	0.408707	2.44674	0.357314	0.0177153	0.0071225
1	5601300	1	1	1	1	1	1	25175000	10897000	1	1	1	1	1	1	1	1	4	CON__Q15323;CON__Q9UE12;Q15323;CON__Q497I4;CON__Q8IUT8;CON__Q14525;Q14525;CON__O76009;CON__Q6NTB9;O76009;CON__REFSEQ:XP_986630;O76011;CON__A2A5Y0;CON__O76011;CON__Q9D646	CON__Q15323;CON__Q9UE12;Q15323;CON__Q497I4;CON__Q8IUT8;CON__Q14525;Q14525;CON__O76009;CON__Q6NTB9;O76009;CON__REFSEQ:XP_986630;O76011;CON__A2A5Y0;CON__O76011	Keratin, type I cuticular Ha1;Keratin, type I cuticular Ha3-II;Keratin, type I cuticular Ha3-I;Keratin, type I cuticular Ha4	KRT31;KRT33B;KRT33A;KRT34	15	6.43993	1.07118e-06	6.012e+06	1.66334e-07	0.31792	0.214082	0.363217
1	1	1	1	1	1	1	1	1	1	1	1	1	1	1	1	1	1	1	CON__Q2KIF2	CON__Q2KIF2			1	1	1	1	1	#DIV/0!	#DIV/0!	#DIV/0!
13201000	18306000	20283000	1	38676000	45646000	31926000	30694000	26746000	28471000	1	1	29142000	33339000	29853000	30571000	32708000	39742000	6	CON__Q2KJF1;P04217;P04217-2;M0R009	CON__Q2KJF1			4	0.865736	1.43525	0.603194	1.65784	0.820734	0.144519	0.146579
42380000	54465000	11650000	16198000	136610000	76559000	147010000	169840000	147370000	162240000	171010000	196430000	146460000	115410000	200370000	156610000	197080000	192930000	14	CON__Q2UVX4;P01024	CON__Q2UVX4			2	2.94173	2.98601	0.985171	1.01505	0.00106966	0.871723	0.00254185
33384000	37063000	23201000	22933000	147350000	117150000	161580000	182480000	91777000	110970000	46580000	68616000	204940000	166770000	249130000	169050000	226150000	217520000	6	CON__Q3MHN5	CON__Q3MHN5			1	1.73717	3.237	0.536661	1.86338	0.300694	0.0300715	0.00118271
161650000	132250000	214830000	215980000	360530000	393570000	166880000	154250000	152250000	165540000	113490000	145440000	270640000	309610000	224090000	229080000	245940000	212460000	9	CON__Q3SX09;CON__P02070;P68871;P02042;E9PFT6;F8W6P5;P02100;P69891;P69892;E9PBW4;E9PEW8;A8MUF7	CON__Q3SX09			12	0.607144	1.0088	0.601849	1.66155	0.107475	0.00145023	0.969869
232920000	278590000	310250000	337100000	229060000	240720000	53364000	71696000	56365000	58082000	41422000	61137000	39498000	44664000	43867000	30651000	39886000	39794000	16	CON__Q3SX14;P06396;P06396-3;F5H1A8;P06396-2;Q5T0H8;Q5T0H7;Q5T0H9;Q5T0I0;Q5T0I1	CON__Q3SX14;P06396;P06396-3;F5H1A8;P06396-2	Gelsolin	GSN	10	0.210032	0.146355	1.43508	0.696825	5.98349e-05	0.00812025	6.83118e-05
123470000	115730000	44767000	50877000	217790000	182980000	230090000	247820000	247590000	262420000	96645000	100190000	548990000	636230000	318150000	331590000	376180000	414730000	12	CON__Q3SZ57;J3KMX3;P02771	CON__Q3SZ57			3	1.61057	3.56963	0.451186	2.21638	0.256731	0.00765867	0.00216348
13426000	15855000	1	1	12641000	17851000	17840000	17646000	14725000	19202000	1	1	43033000	37432000	20992000	19278000	21777000	21899000	4	CON__Q3SZH5	CON__Q3SZH5			1	1.16128	2.75059	0.422192	2.36859	0.798767	0.012363	0.00579078
63549000	87223000	6715000	15759000	63489000	97813000	115940000	114750000	19865000	18530000	16346000	21009000	28693000	30676000	51475000	27066000	20612000	12951000	6	CON__Q3SZR3	CON__Q3SZR3			1	0.915982	0.512551	1.7871	0.559565	0.821699	0.325825	0.217687
19951000	17942000	1	9709500	44133000	52150000	39626000	45578000	34990000	36371000	22963000	29180000	67088000	57323000	44680000	45365000	57570000	36692000	5	CON__Q3SZV7	CON__Q3SZV7			1	1.45051	2.14558	0.676047	1.47919	0.354243	0.0160429	0.0389445
14998000	16006000	9232700	1	28964000	35268000	34534000	28865000	21665000	20438000	11720000	25548000	28617000	42753000	29997000	26447000	45033000	32554000	6	CON__Q3T052	CON__Q3T052			1	1.36663	1.96615	0.695079	1.43868	0.371007	0.10532	0.0131017
17332000	26706000	20002000	24896000	30269000	29750000	18094000	31057000	25489000	28073000	29752000	38224000	30811000	32921000	27686000	24507000	25432000	31323000	2	CON__Q3ZBS7	CON__Q3ZBS7			1	1.14591	1.15928	0.98847	1.01166	0.0415899	0.912674	0.196661
195760000	159170000	51848000	65641000	354310000	366330000	387660000	330470000	320250000	245750000	53638000	88053000	711860000	767830000	456250000	480180000	426210000	444870000	10	CON__Q58D62	CON__Q58D62			1	1.1951	2.75527	0.433749	2.30548	0.726407	0.000902196	0.0125859
32779000	35108000	57929000	49886000	19094000	22142000	21693000	18825000	64497000	70917000	52087000	18396000	25046000	19327000	26957000	26564000	9131400	8355500	4	CON__Q86YZ3;Q86YZ3	CON__Q86YZ3;Q86YZ3	Hornerin	HRNR	2	1.13588	0.531861	2.13567	0.468238	0.557077	0.0611866	0.00514502
5789900	5424300	1	1	9606300	14266000	8794400	4254800	3422200	3790400	1	1	1	4070500	4520500	14591000	1	1	2	CON__Q95121;P36955;I3L2R7;I3L4Z0;I3L1U4;I3L3Z3;I3L425	CON__Q95121;P36955;I3L2R7;I3L4Z0;I3L1U4;I3L3Z3;I3L425	Pigment epithelium-derived factor	SERPINF1	7	0.577481	0.66071	0.874032	1.14412	0.466894	0.85568	0.659957
84995000	104150000	43800000	40267000	244000000	211040000	309320000	282170000	317860000	232590000	96460000	43954000	613910000	524970000	373340000	321030000	440140000	455480000	18	CON__Q9TRI1;P19823;Q5T985;Q5T987	CON__Q9TRI1			4	1.76087	3.74715	0.469921	2.12802	0.301219	0.0089309	0.00115916
68650000	52743000	25013000	23492000	140270000	115730000	206370000	135680000	112810000	90373000	42946000	49377000	163820000	166720000	171040000	145290000	158350000	163320000	7	CON__Q9TTE1;CON__A2I7N1;CON__A2I7N0	CON__Q9TTE1;CON__A2I7N1;CON__A2I7N0			3	1.49697	2.27411	0.658265	1.51914	0.401398	0.0695741	0.00597252
10325000	8098600	9275700	7704100	7607600	7930400	6043300	7396400	6776800	7904300	1	7728000	6326200	5741900	6221700	1	5072700	1	3	D3DQV9;P78344;H0Y3P2;P78344-2;H0YCH5;H0YD77;H0YEC5;H0YCF8;H0YDC0;H0YEN8;H0YD99	D3DQV9;P78344;H0Y3P2;P78344-2;H0YCH5;H0YD77;H0YEC5;H0YCF8;H0YDC0;H0YEN8;H0YD99	Eukaryotic translation initiation factor 4 gamma 2	EIF4G2	11	0.703726	0.458615	1.53446	0.651695	0.082565	0.261241	0.00591259
1	1	1	1	1	1	1	1	1	1	1	24359000	13688000	16639000	1	1	1	1	1	Q12904-2;Q12904;D6R937	Q12904-2;Q12904;D6R937	Aminoacyl tRNA synthase complex-interacting multifunctional protein 1;Endothelial monocyte-activating polypeptide 2	AIMP1	3	4.05983e+06	5.0545e+06	0.803212	1.245	0.340893	0.851608	0.147481
10718000	14376000	7561900	9687800	17746000	19072000	17729000	23736000	18519000	16199000	14910000	14926000	29221000	27301000	20401000	19547000	24330000	28241000	4	P61221;D6R9I9;D6RGF4;H0Y990	P61221;D6R9I9;D6RGF4;H0Y990	ATP-binding cassette sub-family E member 1	ABCE1	4	1.33927	1.88274	0.711341	1.4058	0.0826568	0.00770017	0.000967627
64706000	68586000	34960000	37269000	46229000	31276000	42428000	43532000	41073000	43210000	29782000	26302000	62229000	57832000	43086000	39799000	37915000	50382000	5	Q99729-2;D6RBZ0;Q99729-3;D6RD18;D6R9P3;Q99729;Q99729-4	Q99729-2;D6RBZ0;Q99729-3;D6RD18;D6R9P3;Q99729;Q99729-4	Heterogeneous nuclear ribonucleoprotein A/B	HNRNPAB	7	0.799669	1.02903	0.777107	1.28682	0.218996	0.0607802	0.86178
2352900	2058200	1	2123300	2566100	1	6284800	7122200	6056100	9959500	8151200	1	5372700	4590200	7591100	5781200	7600600	8945100	2	Q9HCC0;Q9HCC0-2;D6RDF7;D6R9R1	Q9HCC0;Q9HCC0-2;D6RDF7;D6R9R1	Methylcrotonoyl-CoA carboxylase beta chain, mitochondrial	MCCC2	4	4.12876	4.38227	0.94215	1.0614	0.00884682	0.807585	0.000105697
28096000	19543000	36981000	10532000	51870000	35127000	5607400	5254400	3544900	5041100	2583600	1	2453000	4660100	5494700	5863100	1	1	4	Q16643-3;Q16643;D6R9W4;Q16643-2;D6RFI1;D6RCR4	Q16643-3;Q16643;D6R9W4;Q16643-2	Drebrin	DBN1	6	0.120953	0.101405	1.19276	0.83839	0.00118998	0.67922	0.0010637
10642000	12371000	15496000	13474000	14207000	14909000	15955000	17657000	1	16037000	12054000	20383000	8414000	7852800	12507000	15486000	13443000	1	1	H0Y9X1;Q96EY4;D6RA57	H0Y9X1;Q96EY4;D6RA57	Translation machinery-associated protein 16	TMA16	3	1.01217	0.711511	1.42257	0.702955	0.957906	0.300587	0.132847
1	2666700	1	1608400	13074000	5202100	7015400	6022900	3923200	3455200	1	1	58084000	28815000	9824600	11467000	10527000	13183000	2	Q9NR31;Q9Y6B6;D6RD69;D6RDB2;Q5SQT8;D6RAA2	Q9NR31;Q9Y6B6;D6RD69;D6RDB2;Q5SQT8;D6RAA2	GTP-binding protein SAR1a;GTP-binding protein SAR1b	SAR1A;SAR1B	6	0.905349	5.84894	0.154789	6.46043	0.882895	0.0399879	0.0468603
1	1	1	1	1	1	1	1	1	1	1	1	1	1	1	1	1	1	1	P57088;D6RAA6	P57088;D6RAA6	Transmembrane protein 33	TMEM33	2	1	1	1	1	#DIV/0!	#DIV/0!	#DIV/0!
535820000	410280000	551360000	513160000	390290000	547870000	439600000	402240000	376180000	397670000	375710000	345870000	439360000	410450000	450630000	472540000	298970000	284550000	10	P32969;D6RAN4;H0Y9V9;E7ESE0;H0Y9R4;REV__O75648;REV__O75648-2;REV__O75648-5;REV__B4DZN5	P32969;D6RAN4;H0Y9V9;E7ESE0	60S ribosomal protein L9	RPL9	9	0.792623	0.799144	0.99184	1.00823	0.0100173	0.92976	0.0497688
6649900	5847900	5489500	7656100	6120000	1	1	1	1	1	1	1	1	1	1	1	1	1	1	Q9P0M9;H7C5U8;D6RAN8	Q9P0M9;H7C5U8;D6RAN8	39S ribosomal protein L27, mitochondrial	MRPL27	3	1.88897e-07	1.88897e-07	1	1	0.000722226	#DIV/0!	0.000722226
1	3889900	1	1	3513100	3556200	6673600	5966100	1	6293600	1	1	6337000	5090400	1	4228200	5183000	5702600	2	D6RAX7;Q9BT78;D6RD63;D6RFN0;Q9BT78-2	D6RAX7;Q9BT78;D6RD63;D6RFN0;Q9BT78-2	COP9 signalosome complex subunit 4	COPS4	5	1.72762	2.42182	0.713355	1.40183	0.434953	0.470965	0.0624277
10331000	14703000	27014000	28003000	20562000	13278000	14793000	12335000	20825000	1	23405000	30350000	14668000	18191000	13806000	9594300	21016000	24643000	5	P06730-2;D6RBW1;P06730-3;P06730;H0Y8J7;A6NMX2;H0Y8X3;D6RHE2	P06730-2;D6RBW1;P06730-3;P06730	Eukaryotic translation initiation factor 4E	EIF4E	8	0.893029	0.894876	0.997937	1.00207	0.706479	0.994337	0.60569
1	3402100	1	2018800	4550700	3685000	1	1	1	1	1	1	1	8879400	7049000	6970300	11332000	12664000	1	Q5T8R1;P21266;F6XZQ7;P28161;P46439;Q5T8Q9;E9PHN6;P28161-2;E9PHN7;E9PLF1	Q5T8R1;P21266;F6XZQ7;P28161;P46439;Q5T8Q9;E9PHN6;P28161-2;E9PHN7;E9PLF1	Glutathione S-transferase Mu 3;Glutathione S-transferase Mu 2;Glutathione S-transferase Mu 5	GSTM5;GSTM3;GSTM2	10	4.39348e-07	3.43385	1.27946e-07	7.81578e+06	0.0166373	0.00157623	0.0191087
87142000	91813000	74352000	86450000	86160000	82675000	42342000	63210000	62648000	87197000	70415000	73587000	56762000	61796000	69511000	78040000	62674000	66249000	4	P61927;D6RG19;D6R9X9	P61927;D6RG19;D6R9X9	60S ribosomal protein L37;Ribosomal protein L37	RPL37	3	0.785303	0.776717	1.01105	0.989066	0.0191066	0.916495	0.000605975
35163000	32502000	42138000	50630000	41424000	35603000	45119000	35062000	49441000	51193000	40788000	46356000	46786000	46286000	42847000	43332000	41295000	40743000	3	Q96J01;Q6NZ53;D6RGZ2	Q96J01;Q6NZ53;D6RGZ2	THO complex subunit 3	THOC3	3	1.12844	1.10035	1.02553	0.975108	0.19059	0.68125	0.198041
14856000	15608000	13266000	11887000	17069000	21934000	24903000	37458000	27875000	30023000	29303000	34510000	25981000	21555000	33323000	31447000	35131000	32590000	2	O00193;E9PM92;E3W975;E9PRZ9	O00193;E9PM92;E3W975;E9PRZ9	Small acidic protein	SMAP;C11orf58	4	1.94538	1.90263	1.02247	0.978025	8.49787e-05	0.815598	0.000235541
4090700	5486000	6176000	5966900	6891100	10388000	8765700	1	14215000	9737700	5240500	1	1	9165200	11611000	1	11418000	10103000	2	O60925;E5RGS4	O60925;E5RGS4	Prefoldin subunit 1	PFDN1	2	0.973338	1.08458	0.897433	1.11429	0.945523	0.827685	0.824811
83003000	71906000	13563000	23377000	128600000	130940000	104750000	103350000	115610000	120240000	72001000	34457000	270770000	263070000	192520000	205030000	183850000	143350000	5	H0Y7A7;E7ETZ0;P62158;E7EMB3;Q96HY3;G3V361;G3V479;M0QZ52;G3V226;F8WBR5	H0Y7A7;E7ETZ0;P62158;E7EMB3;Q96HY3;G3V361	Calmodulin	CALM2;CALM1	10	1.21937	2.78826	0.437321	2.28665	0.514281	0.00061218	0.000829431
15721000	21603000	8227700	9944800	14549000	16019000	28893000	45089000	22407000	19466000	31608000	32194000	44159000	34335000	18628000	21354000	40038000	39298000	3	Q15369;Q15369-2;E5RHG8;R4GMY8	Q15369;Q15369-2;E5RHG8;R4GMY8	Transcription elongation factor B polypeptide 1	TCEB1	4	2.08747	2.29842	0.908221	1.10105	0.00378418	0.604889	0.00279514
1	1	1	1	1	1	8829500	9969800	9642300	8644900	8783800	8716800	10279000	9094000	10472000	8941300	9490000	9372600	11	Q9UNX3;E5RIT6;E5RHH1	Q9UNX3;E5RIT6	60S ribosomal protein L26-like 1	RPL26L1	3	9097850	9608150	0.946889	1.05609	2.47546e-12	0.168909	4.3906e-12
10465000	12689000	5153100	3320500	32570000	25571000	22382000	23073000	16688000	19578000	1	10323000	41800000	42262000	19950000	19770000	32449000	39350000	9	B4DT31;E9PEB5;Q96AE4-2;Q96AE4;C9JSZ1;M0R0C6;M0R263;M0QYG1;M0R251	B4DT31;E9PEB5;Q96AE4-2;Q96AE4	Far upstream element-binding protein 1	FUBP1	9	1.02535	2.17872	0.470618	2.12486	0.950605	0.0115168	0.0202509
31557000	9544400	10642000	11499000	11508000	12185000	1	1	1	1	1	1	1	1	1	1	6514400	1	1	Q9BYD1;E5RJI7;H0YAX3	Q9BYD1;E5RJI7;H0YAX3	39S ribosomal protein L13, mitochondrial	MRPL13	3	6.90168e-08	0.0749339	9.21036e-07	1.08573e+06	0.00177228	0.340893	0.00396267
17054000	1	25803000	30918000	16741000	24988000	32383000	36474000	34685000	35189000	39039000	50603000	31343000	36033000	39552000	34068000	36246000	52195000	3	E5RJR5;P63208;P63208-2;F8W8N3;E7ERH2;E5RGM3;E5RI56	E5RJR5;P63208;P63208-2;F8W8N3;E7ERH2;E5RGM3	S-phase kinase-associated protein 1	SKP1	7	1.97719	1.9864	0.995363	1.00466	0.00462438	0.965617	0.00537092
16212000	16313000	15913000	14296000	10317000	10278000	16667000	14046000	11897000	10631000	1	8983500	11240000	9485000	11536000	11549000	7914900	11329000	3	Q86UE4;E5RJU9;H0YB56	Q86UE4;E5RJU9;H0YB56	Protein LYRIC	MTDH	3	0.746733	0.756686	0.986846	1.01333	0.209539	0.955631	0.0285907
27266000	11686000	20198000	14413000	14795000	13769000	16101000	19520000	16453000	13687000	14747000	17768000	13529000	19280000	17603000	16433000	17629000	17373000	5	O95071;J3KMW7;E7EMW7;E7ET84	O95071;J3KMW7;E7EMW7	E3 ubiquitin-protein ligase UBR5	UBR5	4	0.962292	0.997258	0.964938	1.03634	0.802659	0.618537	0.985349
1416200	3554400	2290200	2146700	5212100	4677100	7795100	3425800	2952400	2517300	3092900	1	7886400	6073900	3745600	6154700	4579100	7659000	4	P62820;E7END7;B7Z8M7;P62820-2;E7ETK2;P62820-3;Q9H0U4	P62820;E7END7;B7Z8M7;P62820-2;E7ETK2;P62820-3;Q9H0U4	Ras-related protein Rab-1A;Ras-related protein Rab-1B	RAB1A;RAB1B	7	1.02523	1.87072	0.548039	1.82469	0.947526	0.0513712	0.0117816
11458000	9857500	2394400	2410900	19175000	22661000	17600000	16602000	19114000	20078000	5184000	5261100	37660000	39425000	20406000	21317000	23641000	26236000	3	Q93045-2;Q93045;E5RGX5;E7EVN3;E5RIR6;Q9H169-2;G5EA16;Q9H169;B7Z2Z7	Q93045-2;Q93045;E5RGX5	Stathmin-2;Stathmin	STMN2	9	1.23371	2.48224	0.497016	2.01201	0.563336	0.00946011	0.00595966
6509100	5119200	4281500	4150900	9534600	9162100	15496000	9623200	1	7646800	1	1	15618000	14511000	10529000	9001700	8412700	7938300	2	P51659-2;P51659;P51659-3;E7EWE5;E7ET17;G5E9S2;E7EPL9;E7ER27	P51659-2;P51659;P51659-3;E7EWE5;E7ET17;G5E9S2;E7EPL9;E7ER27	Peroxisomal multifunctional enzyme type 2;(3R)-hydroxyacyl-CoA dehydrogenase;Enoyl-CoA hydratase 2	HSD17B4	8	0.845413	1.70318	0.496374	2.01461	0.731864	0.0925089	0.0209072
33241000	23715000	22995000	21802000	21378000	21173000	23259000	25181000	22891000	23659000	25484000	25639000	16600000	22008000	22994000	21034000	19760000	29230000	8	Q9Y520-7;Q9Y520;Q9Y520-5;E7EPN9;Q9Y520-4;Q9Y520-6;Q9Y520-3;H7C5N8	Q9Y520-7;Q9Y520;Q9Y520-5;E7EPN9;Q9Y520-4;Q9Y520-6;Q9Y520-3	Protein PRRC2C	PRRC2C	8	1.01254	0.912144	1.11006	0.900851	0.879955	0.206384	0.426011
1	1	1	1	15908000	17031000	18440000	7936000	1	9105600	1	1	76825000	36440000	59105000	72369000	20358000	27710000	2	Q9BTT0;E9PLC4;Q5TB19;Q9BTT0-2;Q9BTT0-3;Q5TB25;E9PPH5;E9PI45	Q9BTT0;E9PLC4;Q5TB19;Q9BTT0-2;Q9BTT0-3;Q5TB25;E9PPH5;E9PI45	Acidic leucine-rich nuclear phosphoprotein 32 family member E	ANP32E	8	1.07719	8.88937	0.121177	8.25236	0.928621	0.00183174	0.00187804
3267700000	3265700000	774490000	1107200000	95497000	90811000	509840000	608870000	359110000	397070000	656810000	714280000	89675000	93829000	119660000	148140000	248300000	259310000	8	P68431;P84243;Q16695;Q71DI3;K7EK07;K7ES00;Q6NXT2;B4DEB1;K7EMV3;K7EP01	P68431;P84243;Q16695;Q71DI3;K7EK07;K7ES00;Q6NXT2;B4DEB1;K7EMV3;K7EP01	Histone H3.1;Histone H3.3;Histone H3.1t;Histone H3.2;Histone H3.3C;Histone H3	HIST1H3A;H3F3A;HIST3H3;HIST2H3A;H3F3C	10	0.377378	0.111484	3.38506	0.295416	0.170498	0.000183672	0.0605593
20042000	19719000	14077000	18335000	5011900	5509800	4243800	4881900	4390700	3460100	4720900	4087200	3493700	3607800	3387400	3621900	4413000	5318200	3	Q9UKV3;E7EQT4;S4R3H4;Q9UKV3-5;Q9UKV3-2;Q9UKV3-3;G3V3B0;G3V3T3	Q9UKV3;E7EQT4;S4R3H4;Q9UKV3-5;Q9UKV3-2;Q9UKV3-3	Apoptotic chromatin condensation inducer in the nucleus	ACIN1	8	0.311805	0.288314	1.08148	0.92466	0.00748492	0.402259	0.00629524
34933000	40070000	36782000	37704000	30400000	27398000	26605000	21511000	35137000	27539000	40318000	24927000	29864000	20309000	20636000	25726000	18534000	23435000	3	E7EQZ4;Q16637;Q16637-3;Q16637-2;Q16637-4;B4DP61	E7EQZ4;Q16637;Q16637-3;Q16637-2;Q16637-4	Survival motor neuron protein	SMN1	6	0.849243	0.668175	1.27099	0.786789	0.163366	0.0899132	0.00128488
4098500000	4104000000	3691200000	3879000000	4520400000	4236500000	12317000000	11600000000	12393000000	12261000000	15046000000	14621000000	15001000000	15527000000	17693000000	17858000000	16781000000	16710000000	46	P11142;E9PKE3;E9PNE6;P11142-2;A8K7Q2;E9PN89;E9PLF4;E9PK54;E9PQK7;E9PQQ4;E9PS65;P54652;E9PPY6;E9PN25;E9PM13;E9PI65	P11142;E9PKE3;E9PNE6;P11142-2;A8K7Q2;E9PN89	Heat shock cognate 71 kDa protein	HSPA8	16	3.18953	4.05918	0.785759	1.27266	3.29984e-08	0.000758502	1.62856e-10
1	7706300	1	1	6862700	8814500	1	1	1	1	1	1	1	1	1	1	1	1	1	P00505;E7ERW2	P00505;E7ERW2	Aspartate aminotransferase, mitochondrial;Aspartate aminotransferase	GOT2	2	2.56591e-07	2.56591e-07	1	1	0.0513062	#DIV/0!	0.0513062
5363100	3472900	2420800	2416700	4662600	3886900	11544000	11139000	10041000	11121000	57413000	18990000	9485900	8320100	18712000	12318000	15895000	15379000	10	E7ES43;O95757;E9PDE8;D6RJ96	E7ES43;O95757;E9PDE8;D6RJ96	Heat shock 70 kDa protein 4L	HSPA4L	4	5.41097	3.60482	1.50104	0.666207	0.0572781	0.409208	0.000214625
39174000	45475000	51756000	51288000	35491000	34674000	28399000	24785000	24264000	20376000	36666000	25815000	16846000	20978000	33425000	25024000	26665000	22532000	8	E7ESC7;Q7L5Y9;B4DVN3;Q7L5Y9-3;B4DQT1;Q7L5Y9-2;E7ENL1;D6RE80;D6RIB6;Q7L5Y9-4;D6REW7;D6RDW4;Q7L5Y9-5;D6RID6;D6RA86;D6R8Z3	E7ESC7;Q7L5Y9;B4DVN3;Q7L5Y9-3;B4DQT1;Q7L5Y9-2;E7ENL1;D6RE80	Macrophage erythroblast attacher	MAEA	16	0.621679	0.564148	1.10198	0.907458	0.00175951	0.460753	0.000690225
18480000	17661000	24114000	11131000	9994300	26196000	6270400	4831000	5079000	5264200	6755200	1	4066700	5339700	4828300	4678600	6177400	5354200	2	J3KQY1;E7ESL0;Q9NWU5;Q9NWU5-3;Q9NWU5-2	J3KQY1;E7ESL0;Q9NWU5;Q9NWU5-3;Q9NWU5-2	39S ribosomal protein L22, mitochondrial	MRPL22	5	0.262138	0.283008	0.926257	1.07961	0.000942608	0.724078	0.000767705
11295000	10881000	11686000	9603600	10839000	8302200	8972900	7152100	10487000	10480000	8775400	10661000	6233300	5762600	6876800	7629500	7116100	7905400	4	Q5T5U3;F8W9U9;Q5T5U3-3;E7ESW5	Q5T5U3;F8W9U9;Q5T5U3-3;E7ESW5	Rho GTPase-activating protein 21	ARHGAP21	4	0.902912	0.663246	1.36135	0.734564	0.213806	0.00339785	0.000187072
1	1	1	1	3454600	3812000	3320600	1	1	1	1	1	6867900	4567300	1	1	1	1	1	E7ETU3;P60953	E7ETU3;P60953	Cell division control protein 42 homolog	CDC42	2	0.456968	1.57367	0.290384	3.44371	0.502807	0.343193	0.644269
2831800	3306800	3657000	6947900	3156500	3599900	1	1	1	1	1	2820800	2542400	1	3007800	2139500	2379400	1	2	E7ETU7;H0Y9G6;P09001;E9PF06	E7ETU7;H0Y9G6;P09001;E9PF06	39S ribosomal protein L3, mitochondrial	MRPL3	4	0.120035	0.428474	0.280145	3.56958	0.00126337	0.123561	0.0216014
46246000	59974000	51500000	51963000	81627000	63454000	80086000	96278000	80871000	67212000	47471000	47585000	146270000	198710000	77856000	81990000	108160000	108990000	12	E7EU23;P50395;P50395-2;P31150;Q5SX87;Q5SX91;Q5SX86;Q5SX90;G5E9U5	E7EU23;P50395;P50395-2;P31150;Q5SX87	Rab GDP dissociation inhibitor beta;Rab GDP dissociation inhibitor alpha	GDI2;GDI1	9	1.18248	2.03509	0.581048	1.72103	0.284356	0.031981	0.00995339
18125000	9627100	15518000	16250000	26775000	21279000	1	6638000	11290000	7140400	1	8051000	13608000	2519400	8697000	8664000	14073000	16301000	5	P68400;Q8NEV1;E7EU96;P68400-2;H3BNI9	P68400;Q8NEV1;E7EU96	Casein kinase II subunit alpha	CSNK2A1;hCG_21984	5	0.307875	0.59366	0.518606	1.92825	0.00206284	0.09445	0.042061
4304500	6188700	7098700	6358800	5705000	6985200	6366300	5298500	6057800	6011700	5591600	6287200	7525200	6466800	5457900	6593300	5918300	6585100	2	E7EUE1;P28288;F5GYC1;P28288-2	E7EUE1;P28288;F5GYC1;P28288-2	ATP-binding cassette sub-family D member 3	ABCD3	4	0.971949	1.05201	0.923897	1.08237	0.711738	0.171936	0.544587
9816500	10776000	1	13188000	9734200	9511300	16350000	10180000	13710000	13374000	17513000	9902200	11005000	13807000	11116000	12011000	11541000	10718000	1	P35269;M0QXD6;E7EUG6;M0R0R9	P35269;M0QXD6;E7EUG6;M0R0R9	General transcription factor IIF subunit 1	GTF2F1	4	1.5281	1.32384	1.15429	0.86633	0.0643538	0.210505	0.16475
9189000	8568600	7369700	8461700	19523000	15212000	42097000	38655000	35478000	28494000	32215000	32905000	51579000	41167000	30441000	31207000	38759000	49309000	8	E7EVA0;P27816;P27816-6;P27816-2;E9PGM5;P27816-4;F8W9U4;B9ZVR1;P27816-5;H0Y2V1;B4DSQ1;H7C4C5;B5MEG9;H7C456	E7EVA0;P27816;P27816-6;P27816-2;E9PGM5;P27816-4;F8W9U4;B9ZVR1;P27816-5;H0Y2V1;B4DSQ1;H7C4C5	Microtubule-associated protein;Microtubule-associated protein 4	MAP4	14	3.07131	3.54871	0.865472	1.15544	7.68735e-06	0.216624	3.53325e-05
1	1	1	1	1	1	1	1	1	1	1	1	1	1	1	1	6688600	1	2	P39656;E7EWT1;U3KQ84	P39656;E7EWT1;U3KQ84	Dolichyl-diphosphooligosaccharide--protein glycosyltransferase 48 kDa subunit	DDOST	3	1	1.11477e+06	8.97048e-07	1.11477e+06	#DIV/0!	0.340893	0.340893
18935000000	19573000000	20781000000	19681000000	12246000000	12102000000	9400800000	10300000000	10468000000	10222000000	11172000000	11853000000	4116400000	4000300000	7262400000	7183200000	6719100000	6844300000	68	E7EX17;P23588;B4DS13;F8VX11;F8VSC7;F8W0K0;F8VYE9;F8VRU1	E7EX17;P23588;B4DS13;F8VX11	Eukaryotic translation initiation factor 4B	EIF4B	8	0.613792	0.349655	1.75542	0.569664	0.00240268	8.25481e-05	7.17634e-05
333190000	333890000	344030000	337910000	319500000	265520000	247440000	252310000	247270000	268670000	257650000	263290000	210480000	185070000	252370000	234300000	233580000	239820000	32	Q14203;Q14203-6;E7EX90;Q14203-4;Q14203-3;Q14203-2;Q14203-5;Q6AWB1;E7EWF7;E9PCY0;C9JKG6;C9JJD0;C9JJN7;C9JTE5;C9JZA4;C9J1B7;REV__Q5VTR2;REV__H0Y8C5;C9JUI8	Q14203;Q14203-6;E7EX90;Q14203-4;Q14203-3;Q14203-2;Q14203-5;Q6AWB1	Dynactin subunit 1	DCTN1;DKFZp686E0752	19	0.794518	0.700927	1.13353	0.882203	0.000318752	0.0165877	9.46161e-05
27569000	24080000	1	1	33302000	48307000	41767000	26435000	26809000	17194000	14489000	1	34574000	50268000	38230000	37673000	26384000	27064000	2	E9PAV3;Q13765-2;Q13765;H0YHX9;F8W0W4;F8VNW4;F8VZJ2;F8W1N5;Q9BZK3;F8VZ58	E9PAV3;Q13765-2;Q13765;H0YHX9;F8W0W4;F8VNW4;F8VZJ2;F8W1N5;Q9BZK3;F8VZ58	Nascent polypeptide-associated complex subunit alpha;Putative nascent polypeptide-associated complex subunit alpha-like protein	NACA;NACAP1	10	0.950742	1.60736	0.591495	1.69063	0.912318	0.0568612	0.146949
468990000	497070000	598290000	574620000	304650000	304780000	271250000	273380000	360000000	336850000	394920000	426280000	112260000	94900000	202930000	190960000	216300000	212520000	22	O43318-2;O43318;O43318-4;Q9UG54;O43318-3;Q66K14;Q66K14-2;G3V133;F5H6M5	O43318-2;O43318;O43318-4;Q9UG54;O43318-3	Mitogen-activated protein kinase kinase kinase 7	MAP3K7;DKFZp586F0420	9	0.750502	0.374716	2.00285	0.499287	0.0782745	0.000474546	0.000496364
1929100	2279500	2163200	1693000	2306400	2022100	1475100	2059000	2406000	2585600	2704600	3685500	1672400	1606200	2558000	2291800	2416900	2433000	2	O00330;E9PB14;O00330-2;H0YD97	O00330;E9PB14;O00330-2;H0YD97	Pyruvate dehydrogenase protein X component, mitochondrial	PDHX	4	1.20354	1.0472	1.14929	0.870104	0.211794	0.371144	0.626781
1	1	1	1	3863300	4670300	5430700	6254900	4363800	4740500	1	1	4824200	5685900	4366500	5746500	4924600	5427500	3	Q9BWF3;Q9BQ04;E9PB51;Q9BWF3-4;Q96PK6-5;Q9BWF3-2;J3QRR5;U3KQD5;D6R9K7;E9PM61;E9PLB0;Q9BWF3-3	Q9BWF3;Q9BQ04;E9PB51;Q9BWF3-4	RNA-binding protein 4;RNA-binding protein 4B	RBM4;RBM4B	12	2.43624	3.62979	0.671179	1.48992	0.188005	0.170247	0.00247492
1	4619500	3141100	1	4616400	3821800	3791300	3715000	2893200	3018300	1	2354300	3752600	2676400	2659100	1856700	5341600	4792300	1	P20700;E9PBF6	P20700;E9PBF6	Lamin-B1	LMNB1	2	0.973658	1.30125	0.748248	1.33645	0.947378	0.291812	0.45334
8271100	5806100	3264500	5035600	6845600	5230200	22745000	58933000	49701000	56287000	58028000	47227000	26004000	9603400	33309000	30568000	64521000	71585000	7	P31040;E9PBJ5;D6RFM5;H0Y8X1	P31040;E9PBJ5;D6RFM5	Succinate dehydrogenase [ubiquinone] flavoprotein subunit, mitochondrial	SDHA	4	8.50202	6.838	1.24335	0.80428	1.65514e-05	0.414274	0.00642647
58241000	86489000	32392000	35020000	108050000	123140000	139420000	144250000	153060000	141300000	90534000	80431000	342540000	324340000	200830000	167960000	157530000	187280000	13	P22234-2;P22234;E9PBS1;D6RF62	P22234-2;P22234;E9PBS1;D6RF62	Multifunctional protein ADE2;Phosphoribosylaminoimidazole-succinocarboxamide synthase;Phosphoribosylaminoimidazole carboxylase	PAICS	4	1.68947	3.11387	0.542561	1.84311	0.0291868	0.0144982	0.00169682
1	1	1	8808700	8823000	8947400	14579000	12257000	13424000	15753000	1	14981000	7855100	8136800	16275000	9599500	33658000	15541000	2	Q53H12;E9PC15;E9PG39	Q53H12;E9PC15;E9PG39	Acylglycerol kinase, mitochondrial	AGK	3	2.67105	3.4262	0.779594	1.28272	0.0394483	0.489679	0.0364647
24508000	20450000	20432000	20881000	33658000	35547000	34852000	38930000	30368000	29131000	28178000	22465000	48605000	35447000	31018000	24009000	41035000	35310000	7	Q16576-2;Q16576;E9PC52;Q5JP02;Q5JP01;Q5JNZ6	Q16576-2;Q16576;E9PC52;Q5JP02	Histone-binding protein RBBP7	RBBP7	6	1.18297	1.38558	0.853777	1.17127	0.224175	0.233944	0.0484881
8689300	10523000	8555500	1	10760000	10848000	14846000	20533000	13911000	17215000	21696000	21399000	29323000	19594000	20472000	29634000	26740000	16943000	2	P14635;E9PC90;Q5TZP9;H0YA62	P14635;E9PC90;Q5TZP9;H0YA62	G2/mitotic-specific cyclin-B1	CCNB1	4	2.21971	2.8902	0.768013	1.30206	0.00103447	0.0622604	0.000243591
25666000	30603000	23070000	23002000	28201000	29023000	35204000	37535000	36210000	33287000	37989000	32615000	42369000	43280000	46822000	39337000	45362000	50864000	11	Q9NTJ3;E9PD53;Q9NTJ3-2;C9JR83;C9J9E4;C9J578;C9JVD8	Q9NTJ3;E9PD53;Q9NTJ3-2	Structural maintenance of chromosomes protein 4;Structural maintenance of chromosomes protein	SMC4	7	1.33388	1.67978	0.794078	1.25932	0.000221418	0.000572004	5.67355e-06
6164700	5702300	3587800	3594100	2808900	2927800	1978100	2380900	2657400	2690900	2800600	3268500	1715000	1	1940500	1901000	2157600	2187800	3	P78332;E9PGM9;F8WCA5;P78332-2;B4DNY1;B4E0G6;C9JII0	P78332;E9PGM9;F8WCA5;P78332-2;B4DNY1	RNA-binding protein 6	RBM6	7	0.636515	0.399502	1.59327	0.62764	0.0345375	0.0278231	0.00441221
15066000	13941000	11466000	11587000	81808000	56470000	52566000	45753000	23034000	24657000	20950000	1	214190000	193960000	57699000	49451000	48767000	53185000	6	P30048;E9PH29	P30048;E9PH29	Thioredoxin-dependent peroxide reductase, mitochondrial	PRDX3	2	0.877176	3.24293	0.270489	3.69701	0.793787	0.0465055	0.0654894
8627400	11839000	43519000	51795000	11198000	12370000	6166000	6322500	6816800	5604900	7202900	6175600	5773500	5057400	5785900	1	5303300	5779400	5	Q8NCA5;Q8NCA5-2;E9PH82;B4DT23	Q8NCA5;Q8NCA5-2;E9PH82;B4DT23	Protein FAM98A	FAM98A	4	0.27477	0.198779	1.38229	0.723438	0.0567091	0.0955789	0.0397047
1	1	1	1	15959000	19248000	19669000	22229000	25308000	18940000	1	1	38034000	42959000	22455000	23438000	25734000	21446000	2	P42771-4;P42771;J3QRG6;K7ENC6;G3XAG3;P42771-3;P42771-2;K7ES20	P42771-4;P42771;J3QRG6;K7ENC6;G3XAG3;P42771-3;P42771-2;K7ES20	Cyclin-dependent kinase inhibitor 2A, isoforms 1/2/3	CDKN2A	8	2.44684	4.94407	0.494904	2.02059	0.184064	0.033469	0.00137172
1	1	1	1	2069700	2276800	1	1	1	1	1	1	7991200	1	1	1	1	1	2	O43491;E9PHY5;O43491-4;E9PK52;O43491-3;E9PII3;O43491-2;E9PQD2;E9PIG0;E9PRG1;E9PQN0;E9PJP4	O43491;E9PHY5;O43491-4;E9PK52;O43491-3;E9PII3;O43491-2;E9PQD2;E9PIG0;E9PRG1;E9PQN0;E9PJP4	Band 4.1-like protein 2	EPB41L2	12	1.38042e-06	1.83854	7.50825e-07	1.33187e+06	0.145541	0.340893	0.675465
1	1	1	1	1	1	14268000	12632000	13605000	15489000	16509000	12357000	25641000	22515000	13943000	13768000	17438000	19332000	4	Q9UHD1;Q9UHD1-2;E9PHZ2	Q9UHD1;Q9UHD1-2;E9PHZ2	Cysteine and histidine-rich domain-containing protein 1	CHORDC1	3	1.41433e+07	1.87728e+07	0.753394	1.32733	1.14167e-09	0.0466104	2.0392e-06
4680900	4790100	4177100	4042900	4328200	4820900	5397600	6924200	9430300	9394400	9898200	6816600	4206900	3104100	9480200	5219800	13936000	12502000	4	Q04323-2;Q04323;E9PJ81;E9PRQ7;E9PS08	Q04323-2;Q04323;E9PJ81;E9PRQ7	UBX domain-containing protein 1	UBXN1	5	1.7832	1.8051	0.98787	1.01228	0.000995246	0.962009	0.0822354
399730000	397940000	389020000	337110000	492460000	443220000	374580000	347380000	335030000	310340000	292820000	266380000	390660000	396870000	322460000	331030000	348430000	354210000	16	E9PRY8;P29692-2;P29692;E9PK01;P29692-3;E9PI39;E9PQ49;P29692-4;E9PQZ1;E9PL71;E9PL12;E9PPR1;H0YCK7;E9PIZ1;E9PMW7;E9PN91;E9PK06;H0YE72;H0YE58;E9PK72;E9PKK3;E9PJD0;E9PNW6;E9PQC9	E9PRY8;P29692-2;P29692;E9PK01;P29692-3;E9PI39;E9PQ49;P29692-4;E9PQZ1;E9PL71;E9PL12;E9PPR1;H0YCK7;E9PIZ1;E9PMW7;E9PN91	Elongation factor 1-delta	EEF1D	24	0.783308	0.871591	0.898711	1.11271	0.00783632	0.104511	0.0605116
937070	683540	1	1	1	2232000	1	2537300	1774700	1	1	1	2501100	1	1	2251500	2720200	1	3	P06737;E9PK47;P06737-2;P11216;P11217;P11217-2	P06737;E9PK47;P06737-2	Glycogen phosphorylase, liver form;Phosphorylase	PYGL	6	1.11924	1.93967	0.577026	1.73302	0.898833	0.48596	0.385647
31375000	26412000	70795000	66288000	19906000	19751000	1	1	1	1	1	1	1	1	1	1	1	1	27	E9PK91;Q9NYF8-3;E9PKI6;E9PQN2;E9PK09;E9PJA7;H0YF00;H0YF63	E9PK91;Q9NYF8-3;E9PKI6;E9PQN2;E9PK09		BCLAF1	8	2.55834e-08	2.55834e-08	1	1	0.00209467	#DIV/0!	0.00209467
525080000	524530000	838720000	684030000	562730000	432390000	220910000	250350000	228270000	231890000	280270000	288590000	247570000	246050000	197120000	203880000	219130000	219860000	12	H7C2I1;Q99873;Q99873-4;Q99873-2;Q99873-3;E9PKG1;E9PIX6;E9PQ98;H0YDE4;E9PNR9;E9PI83;E9PMW9;Q9NR22;Q9NR22-2;E9PMZ2	H7C2I1;Q99873;Q99873-4;Q99873-2;Q99873-3;E9PKG1;E9PIX6;E9PQ98;H0YDE4;E9PNR9	Protein arginine N-methyltransferase 1	PRMT1	15	0.420543	0.373824	1.12498	0.888907	0.000192061	0.0830537	9.65034e-05
2996300	3113500	4116600	3478300	5127900	6750600	7637200	6251500	5919300	4037300	1	5576400	19910000	12751000	11082000	7079200	11315000	9164700	2	P27695;G3V3M6;G3V3C7;G3V359;G3V5M0;G3V5Q1;H7C4A8;G3V5D9	P27695;G3V3M6;G3V3C7;G3V359;G3V5M0;G3V5Q1;H7C4A8;G3V5D9	DNA-(apurinic or apyrimidinic site) lyase;DNA-(apurinic or apyrimidinic site) lyase, mitochondrial	APEX1	8	1.15004	2.78706	0.412636	2.42345	0.616896	0.00767895	0.00238977
21109000	21250000	21576000	21397000	13756000	12721000	13815000	14443000	14588000	16038000	13874000	13712000	10701000	12981000	10654000	15211000	12303000	11742000	2	Q8N9N8;E9PRR8;E9PS76;E9PLI6;E9PS30;E9PQD0	Q8N9N8;E9PRR8;E9PS76;E9PLI6;E9PS30;E9PQD0	Probable RNA-binding protein EIF1AD	EIF1AD	6	0.773372	0.658194	1.17499	0.85107	0.036443	0.0205972	0.00627341
304280000	399860000	440570000	494730000	358320000	302120000	357760000	309800000	410550000	438020000	496660000	391660000	556690000	416720000	465200000	438870000	397410000	348620000	8	P46776;E9PLL6;E9PJD9;E9PLX7;H0YF34	P46776;E9PLL6;E9PJD9	60S ribosomal protein L27a	RPL27A	5	1.04547	1.14072	0.916501	1.09111	0.679439	0.372105	0.233757
39528000	29804000	20880000	18888000	49636000	46494000	75142000	64253000	61834000	76032000	42471000	43321000	91458000	87441000	72143000	61491000	91679000	105440000	6	G5E9Q2;O75534-3;O75534;O75534-2;E9PLT0;E9PNG3	G5E9Q2;O75534-3;O75534;O75534-2;E9PLT0	Cold shock domain-containing protein E1	CSDE1	6	1.76901	2.48332	0.712355	1.4038	0.0084242	0.0194974	0.000116049
85582000	71792000	71617000	76630000	70276000	86117000	75811000	77130000	75235000	74949000	42646000	52864000	74295000	97811000	86178000	81431000	76400000	75671000	12	P17980;R4GNH3;E9PM69;E9PKD5;E9PMD8;E9PN50;E9PLG2	P17980;R4GNH3;E9PM69;E9PKD5;E9PMD8	26S protease regulatory subunit 6A	PSMC3	7	0.86282	1.06444	0.810586	1.23367	0.147822	0.0528896	0.313856
1	1	1	1	1	1	1	1	1	1	1	1	1	1	1	1	1	1	2	O00170;E9PMH2;E9PPD7	O00170;E9PMH2;E9PPD7	AH receptor-interacting protein;Peptidyl-prolyl cis-trans isomerase	AIP	3	1	1	1	1	#DIV/0!	#DIV/0!	#DIV/0!
1	1	1	1	8304600	9945900	5771600	5503400	6317800	7128400	1	1	26170000	31885000	1	6647500	7506800	9245600	2	O75964;E9PN17	O75964;E9PN17	ATP synthase subunit g, mitochondrial	ATP5L	2	1.35455	4.46316	0.303496	3.29494	0.655308	0.103197	0.0824914
89351000	88637000	38571000	40465000	160560000	156040000	227230000	215540000	254410000	245230000	141410000	130490000	555680000	574880000	337890000	373310000	408380000	432090000	6	P43487;C9JGV6;C9JXG8;C9JJ34;B3KUP2;C9JDM3;H7C137;C9JIC6	P43487;C9JGV6;C9JXG8;C9JJ34;B3KUP2;C9JDM3;H7C137	Ran-specific GTPase-activating protein	RANBP1	8	2.11691	4.67594	0.452724	2.20885	0.00606015	0.000298688	1.52908e-05
7630400	10852000	13506000	12077000	8446500	14418000	16038000	10218000	1	12955000	1	1	13729000	13288000	12844000	11077000	11904000	12341000	2	Q9UHX1;Q9UHX1-2;Q9UHX1-5;Q9UHX1-3;Q9UHX1-6;Q9UHX1-4;H0YEM1;E9PQ56;H0YCP8;E9PN18;E9PMU7;E9PL19	Q9UHX1;Q9UHX1-2;Q9UHX1-5;Q9UHX1-3;Q9UHX1-6;Q9UHX1-4;H0YEM1;E9PQ56;H0YCP8;E9PN18;E9PMU7;E9PL19	Poly(U)-binding-splicing factor PUF60	PUF60	12	0.585852	1.12331	0.521541	1.9174	0.181269	0.0771458	0.269453
4450000	6909900	4683600	4877200	3922200	3814400	1	1	1	1	1	1	1	1655400	1	1	1	1	2	O75152;E9PQ61;E9PBY7	O75152;E9PQ61;E9PBY7	Zinc finger CCCH domain-containing protein 11A	ZC3H11A	3	2.09371e-07	0.0577656	3.62449e-06	275901	1.11224e-06	0.340893	7.68035e-06
3747900	3964200	3707400	5681600	3000200	3158400	1	4382400	1	1	1	1	1	1	1	1	1	1	1	P49756;P49756-3;P49756-2;E9PQU5	P49756;P49756-3;P49756-2;E9PQU5	RNA-binding protein 25	RBM25	4	0.188412	2.57957e-07	730401	1.36911e-06	0.00350386	0.340893	1.7338e-06
535630000	598770000	456160000	695980000	423240000	354600000	293720000	264580000	257150000	281850000	228920000	284690000	283380000	269240000	263690000	262250000	294640000	276710000	3	E9PR30;P62861	E9PR30;P62861	40S ribosomal protein S30	FAU	2	0.525689	0.538416	0.976362	1.02421	0.000871603	0.564498	0.00096645
1	1	1	1	1	1	4605000	1	5085700	1	1	1	10123000	9406600	1	1	7943700	7475600	2	O00154;O00154-7;O00154-5;O00154-4;O00154-6;O00154-3;K7EKP8;O00154-2;F5GWE2;B4DUX0	O00154;O00154-7;O00154-5;O00154-4;O00154-6;O00154-3;K7EKP8;O00154-2;F5GWE2;B4DUX0	Cytosolic acyl coenzyme A thioester hydrolase	ACOT7	10	1.61512e+06	5824817	0.277282	3.60644	0.145593	0.0778849	0.0113797
33773000	35881000	37395000	33352000	35365000	32907000	31861000	34307000	29599000	25982000	35034000	39816000	23473000	16832000	25574000	31188000	24480000	30898000	8	Q14839-2;Q14839;F5GWX5;Q12873-3;Q12873;Q12873-2;Q5TG85;K7EMY3	Q14839-2;Q14839;F5GWX5	Chromodomain-helicase-DNA-binding protein 4	CHD4	8	0.942139	0.730545	1.28964	0.775411	0.3548	0.0303843	0.00214241
18531000	20454000	23586000	21586000	9332900	9867300	7135800	11339000	11018000	9788300	11377000	9315000	8317100	11989000	1	9774500	9752300	8108800	5	Q9Y2J2;F5GX05;Q9Y2J2-2;Q9Y2J2-3;F5H7W5;E7EUF8;J3QS55;J3KT37;J3QR33;J3QKK4;J3KRD1;J3QKY2;J3QLU5;J3KS70;J3QRQ6	Q9Y2J2;F5GX05;Q9Y2J2-2;Q9Y2J2-3;F5H7W5;E7EUF8	Band 4.1-like protein 3	EPB41L3	15	0.580251	0.463845	1.25096	0.799387	0.0191148	0.297091	0.0121572
1	7117500	1	13653000	1	5644100	19799000	35348000	26388000	28498000	25057000	30132000	15068000	1	25070000	25271000	30720000	31096000	3	Q9UJS0-2;Q9UJS0;F5GX33;O75746;B3KR64	Q9UJS0-2;Q9UJS0;F5GX33	Calcium-binding mitochondrial carrier protein Aralar2	SLC25A13	5	6.25495	4.81646	1.29866	0.770025	2.16426e-05	0.259829	0.0105373
3725100	19781000	11617000	10064000	15962000	12293000	12057000	17502000	10438000	10972000	12583000	7948400	16650000	17896000	14295000	11796000	20420000	14884000	2	M0R242;Q9UI30;J3KNG5;F5GX77;F5GYQ2	M0R242;Q9UI30;J3KNG5;F5GX77;F5GYQ2	tRNA methyltransferase 112 homolog	TRMT112	5	0.973561	1.30635	0.745254	1.34182	0.902458	0.0458852	0.170825
345140000	453180000	545440000	593890000	148770000	181500000	7485700	13257000	5928400	20328000	4125000	5577000	3507600	2089100	2791800	5605600	6099500	5596600	31	F5GX82;O94915;F2Z2S2;H0Y9X0;D6RJI4;D6R9B9;Q5TBA9;O94915-2;REV__Q53GT1;REV__B7Z2G1;REV__C9JHG1;REV__C9J191	F5GX82;O94915;F2Z2S2	Protein furry homolog-like	FRYL	12	0.0250014	0.0113276	2.20711	0.453081	0.000664472	0.0773615	0.000598099
11460000	1	11076000	16063000	7200300	5226800	15308000	13632000	12632000	10946000	13682000	1	10718000	1	12510000	13312000	1	11130000	3	Q9H2U1;F5GZS0;Q9H2U1-2;Q9H2U1-3;E7EWK3	Q9H2U1;F5GZS0;Q9H2U1-2;Q9H2U1-3;E7EWK3	Probable ATP-dependent RNA helicase DHX36	DHX36	5	1.29738	0.934228	1.38871	0.720091	0.452212	0.387209	0.873356
1	5208300	1	5655700	9149800	9767000	14798000	12009000	11053000	10730000	11550000	17101000	83511000	18462000	14491000	14198000	19271000	26439000	2	P08195-4;J3KPF3;P08195;F5GZS6;P08195-3;P08195-2;H0YFS2;F5H0E2;F5H867;F5GZR9	P08195-4;J3KPF3;P08195;F5GZS6;P08195-3;P08195-2;H0YFS2;F5H0E2;F5H867;F5GZR9	4F2 cell-surface antigen heavy chain	SLC3A2	10	2.59365	5.92234	0.437944	2.2834	0.00288433	0.164757	0.0525176
3933200000	3501900000	3916700000	4374700000	2912900000	2817900000	4091100000	4030500000	4680100000	4582100000	5409000000	5306400000	2584900000	2393300000	3925800000	4142700000	3781000000	3754400000	27	F5H012;P19474;P19474-2;H0YDP8	F5H012;P19474;P19474-2	E3 ubiquitin-protein ligase TRIM21	TRIM21	4	1.30954	0.959212	1.36523	0.73248	0.00958823	0.00880139	0.719385
9630900	10752000	9783800	11968000	10337000	9609600	15738000	18840000	17372000	23980000	17554000	28167000	18913000	17805000	18490000	14282000	1	18901000	3	Q8WW22-2;Q8WW22;Q8WW22-3;F5H170	Q8WW22-2;Q8WW22;Q8WW22-3;F5H170	DnaJ homolog subfamily A member 4	DNAJA4	4	1.95954	1.42379	1.37628	0.726595	0.000543485	0.155271	0.181605
18080000	14196000	6699000	8070200	58142000	93831000	55714000	67269000	32270000	38000000	9591600	12441000	169680000	177870000	68739000	85465000	102760000	117160000	5	Q5W0H4;P13693;E9PJF7;J3KPG2;Q8TBK7;Q56UQ5;Q9HAU6;H0YCX0	Q5W0H4;P13693;E9PJF7;J3KPG2;Q8TBK7	Translationally-controlled tumor protein	TPT1	8	1.08174	3.62617	0.298314	3.35217	0.877772	0.00207158	0.0037667
356400000	309330000	290530000	340520000	205120000	191020000	221280000	232160000	212840000	192190000	221730000	201970000	145340000	148840000	225660000	169600000	184960000	176320000	13	F5H2S7;Q13561-2;Q13561-3;Q13561;F5H223;F8W1I6;F8VW18;H0YI98;F8VRV7;F8VX93;H0YHL1;F8W0U6	F5H2S7;Q13561-2;Q13561-3;Q13561;F5H223;F8W1I6;F8VW18;H0YI98	Dynactin subunit 2	DCTN2	12	0.757372	0.620655	1.22028	0.819486	0.0392778	0.0159535	0.00582967
1	1	1	1	1	1	4881700	4600600	4470500	4164300	4348300	4638200	1	1	5845200	5760900	5277000	5520400	2	O95163;F5H2T0;H0YDF3	O95163;F5H2T0;H0YDF3	Elongator complex protein 1	IKBKAP	3	4.51727e+06	3733917	1.20979	0.826588	7.96933e-13	0.524506	0.0102478
7795600	4447500	4318100	6638900	3346800	2883400	2592200	1	2077600	1	2142500	1	1	1586300	2466200	1	1	1	2	Q13523;F5H2U2;H0YDJ3	Q13523;F5H2U2;H0YDJ3	Serine/threonine-protein kinase PRP4 homolog	PRPF4B	3	0.231472	0.137698	1.68101	0.59488	0.0024212	0.512339	0.000841093
9326300	10965000	1	13986000	20400000	26031000	25098000	22003000	1	23535000	1	1	58723000	85876000	24041000	22854000	38077000	28534000	5	P26639-2;P26639;G3XAN9;E7ERI3;D6RDJ6;D6R9F8;D6RCA5;D6RBR8	P26639-2;P26639;G3XAN9;E7ERI3	Threonine--tRNA ligase, cytoplasmic	TARS	8	0.875201	3.198	0.273672	3.65401	0.79988	0.021081	0.0208642
5731500	5853900	9042200	7589000	1	10002000	12456000	6748900	6622900	6674100	6631200	1	8107600	8462500	7521200	6758500	1	1	25	F5H5D3;Q9BQE3	F5H5D3;Q9BQE3	Tubulin alpha-1C chain	TUBA1C	2	1.02393	0.807193	1.2685	0.78833	0.945321	0.561847	0.587489
1	1	2089200	1	1	3060400	3116000	1	1	1	1	1	1	1	1	1	1	1	1	Q9UHB9;Q9UHB9-2;Q9UHB9-4;F5H5Y3	Q9UHB9;Q9UHB9-2;Q9UHB9-4;F5H5Y3	Signal recognition particle 68 kDa protein	SRP68	4	0.605096	1.16514e-06	519334	1.92554e-06	0.665789	0.340893	0.154444
2417200	3509200	1501200	1898200	12110000	12385000	6946100	7177200	4442300	6152500	2313700	2070100	16155000	12822000	6264400	4778900	9433200	8181100	1	O75947;O75947-2;F5H608	O75947;O75947-2;F5H608	ATP synthase subunit d, mitochondrial	ATP5H	3	0.860473	1.70412	0.504938	1.98044	0.739895	0.0358996	0.17628
3794000	4422100	3735800	3723800	4404200	4953200	5357500	7137700	9570000	1	1	1	5224800	3070800	4870600	6042700	5218100	7539100	2	Q8N684-3;Q8N684;Q8N684-2;F5H669;F5H047;F5H6M0;J3QT54	Q8N684-3;Q8N684;Q8N684-2;F5H669;F5H047;F5H6M0;J3QT54	Cleavage and polyadenylation specificity factor subunit 7	CPSF7	7	0.881441	1.27695	0.690269	1.44871	0.7826	0.389198	0.0974999
63589000	74768000	104980000	103910000	38936000	54501000	32121000	35296000	21712000	22003000	17147000	21853000	71448000	70428000	26323000	28480000	31236000	132890000	5	Q96A72;P61326;F5H6N1;A6NEC0;B1ARP8;F5H6P7;F5H3U9	Q96A72;P61326;F5H6N1;A6NEC0;B1ARP8	Protein mago nashi homolog 2;Protein mago nashi homolog	MAGOHB;MAGOH	7	0.340679	0.818739	0.416103	2.40325	0.00158166	0.0669137	0.522023
16590000	9370200	6435900	5954300	37022000	33494000	94843000	39617000	22620000	18727000	10223000	1	188770000	192610000	34595000	32246000	47567000	43043000	9	Q14697-2;Q14697;F5H6X6;E9PKU7;E9PNH1	Q14697-2;Q14697;F5H6X6;E9PKU7	Neutral alpha-glucosidase AB	GANAB	5	1.70879	4.94947	0.345247	2.89647	0.410335	0.122555	0.0518948
17505000	16360000	2716500	5914500	34286000	58058000	37062000	38196000	28476000	32334000	6551400	1	126540000	89260000	52194000	42351000	60214000	80822000	10	P31939;P31939-2;F5GWY2;H7C1S2;H7C084;C9JLK0;H7BZU3;F8WEF0	P31939;P31939-2;F5GWY2;H7C1S2;H7C084	Bifunctional purine biosynthesis protein PURH;Phosphoribosylaminoimidazolecarboxamide formyltransferase;IMP cyclohydrolase	ATIC	8	1.05769	3.34753	0.315962	3.16493	0.906486	0.00463715	0.00576139
81016000	79585000	81475000	112150000	49741000	56760000	85274000	92109000	93187000	104230000	87934000	75628000	71003000	46633000	73010000	87566000	95616000	88454000	5	P10515;H0YDD4;F5H7M3;E9PEJ4	P10515;H0YDD4;F5H7M3;E9PEJ4	Dihydrolipoyllysine-residue acetyltransferase component of pyruvate dehydrogenase complex, mitochondrial	DLAT	4	1.16851	1.00338	1.16457	0.858682	0.216105	0.152694	0.982522
12559000	11144000	6512200	6878400	25097000	22830000	29321000	31088000	20452000	19281000	8535900	8464100	69418000	75737000	34112000	23944000	37533000	40043000	5	P34897;P34897-3;B4DLV4;P34897-2;H0YIZ0;G3V2Y4;G3V5L0	P34897;P34897-3;B4DLV4;P34897-2;H0YIZ0;G3V2Y4	Serine hydroxymethyltransferase, mitochondrial;Serine hydroxymethyltransferase	SHMT2	7	1.37781	3.30258	0.417192	2.39698	0.321872	0.0155968	0.00495148
1	1	1	1	1	44163000	17698000	10569000	13998000	11145000	25799000	11467000	1	1	12490000	13921000	1	7950900	3	P60981;F6RFD5;P60981-2	P60981;F6RFD5;P60981-2	Destrin	DSTN	3	2.05321	0.77807	2.63885	0.378953	0.340155	0.0260523	0.839028
344840000	436870000	107990000	266120000	960250000	902640000	652220000	631820000	529960000	419650000	552110000	385310000	761260000	871810000	308650000	253890000	535830000	597100000	1	F6U236	F6U236		PACSIN1	1	1.05047	1.10264	0.952691	1.04966	0.868386	0.814302	0.772525
30383000	26000000	25933000	36945000	19284000	20185000	16297000	16779000	20336000	25902000	26446000	1	1	1	18254000	1	12121000	13353000	1	Q9Y2J0;Q9Y2J0-2;F8W1K7;F8VVK8;F8VNP7;F8VNW3;F8W1A3;F8VV58;F8W131;F8VR41;F8VZS2;F8VNU2;F8VTR7	Q9Y2J0;Q9Y2J0-2;F8W1K7;F8VVK8;F8VNP7;F8VNW3;F8W1A3;F8VV58;F8W131;F8VR41;F8VZS2;F8VNU2;F8VTR7	Rabphilin-3A	RPH3A	13	0.666289	0.275487	2.41859	0.413464	0.0941063	0.0741308	0.00123414
78442000	71796000	60643000	52512000	84915000	77043000	142310000	159510000	144850000	150970000	111890000	159290000	171070000	139060000	167570000	154420000	176410000	170560000	18	P27708;F8VPD4;H7C2E4;H7BZB3	P27708;F8VPD4	CAD protein;Glutamine-dependent carbamoyl-phosphate synthase;Aspartate carbamoyltransferase;Dihydroorotase	CAD	4	2.0426	2.30184	0.887375	1.12692	7.1785e-06	0.072905	2.41875e-07
171160000	171090000	140580000	101940000	189580000	158060000	72140000	105140000	67057000	52485000	51242000	35081000	196030000	169480000	94819000	82121000	120840000	80672000	11	F8VQ10;Q13838-2;Q13838;Q5STU3;B4DP52;O00148;F6WLT2;F6TRA5;F6UN21;F6S4E6;H0Y400;O00148-2;B1Q2N1;K7EQN7;B4DIJ6;F6UJC5;F6R6M7;K7EPJ3;F6QYI9;K7EN69;K7EN25;H0YCC6;E7EMX2;F6SXL5;F6S2B7;F6U6E2;K7EIL8;K7EL56;F6QWI5;K7ENP6	F8VQ10;Q13838-2;Q13838;Q5STU3;B4DP52;O00148;F6WLT2;F6TRA5;F6UN21	Spliceosome RNA helicase DDX39B;ATP-dependent RNA helicase DDX39A	DDX39B;BAT1;DDX39A	30	0.410919	0.797891	0.515006	1.94172	0.000189324	0.0215089	0.210097
133110000	141410000	141380000	132440000	79781000	92894000	55868000	60416000	88434000	64917000	87214000	61054000	13826000	9684000	44021000	37013000	34482000	32074000	17	P46821;D6RA32;D6RA40;E9PGC8;J3KPX8;P78559-2;P78559	P46821	Microtubule-associated protein 1B;MAP1 light chain LC1	MAP1B	7	0.579604	0.237304	2.44245	0.409425	0.00225815	0.000475253	2.15438e-05
1	1	11413000	1	8292600	1	1	1	1	1	1	1	1	1	1	11611000	1	1	2	O75334;O75334-3;G3V200;O75334-4;J3KNM3;O75334-2;F8VWR9;F8VU88;Q13136;Q13136-2;E9PJZ7;E9PPF6;E9PID5	O75334;O75334-3;G3V200;O75334-4;J3KNM3;O75334-2;F8VWR9;F8VU88;Q13136;Q13136-2;E9PJZ7;E9PPF6;E9PID5	Liprin-alpha-2;Liprin-alpha-1	PPFIA2;PPFIA1	13	3.04482e-07	0.589224	5.16751e-07	1.93517e+06	0.151658	0.340893	0.64809
60954000	66080000	50076000	64194000	75714000	78705000	216400000	224370000	217410000	244360000	350230000	315000000	191250000	229620000	264210000	276590000	287950000	279760000	9	Q00325;Q00325-2;F8VVM2;F8VWQ0;F8VWR4;F8VZL5	Q00325;Q00325-2;F8VVM2	Phosphate carrier protein, mitochondrial	SLC25A3	6	3.96179	3.86477	1.0251	0.975513	9.23253e-06	0.8232	3.03111e-07
7250500	5427700	4067300	3780300	8988600	7420900	44520000	60604000	54448000	52088000	77335000	65036000	32193000	35834000	60077000	57088000	37645000	42654000	6	F8VW96;Q16527;F8VQR7	F8VW96;Q16527;F8VQR7	Cysteine and glycine-rich protein 2	CSRP2	3	9.58517	7.188	1.3335	0.749909	5.8404e-07	0.0510897	1.32708e-05
8475500	9727800	9360000	8762000	3494600	10689000	8069500	8166000	7565800	10467000	7178900	1	11573000	1	7553500	6710400	1	1	3	F8VXC8;Q8TAQ2;Q8TAQ2-3;Q8TAQ2-2;Q92922	F8VXC8;Q8TAQ2;Q8TAQ2-3;Q8TAQ2-2;Q92922	SWI/SNF complex subunit SMARCC2;SWI/SNF complex subunit SMARCC1	SMARCC2;SMARCC1	5	0.820592	0.511532	1.60419	0.623369	0.418131	0.323857	0.102361
1	1	1	1	1936500	1786100	1	1	1	1	1	1	3653600	1	1	1	2719300	2568700	1	F8W031;Q9Y2B0;F8VXJ7;F8W1K5	F8W031;Q9Y2B0;F8VXJ7;F8W1K5	Protein canopy homolog 2	CNPY2	4	1.61177e-06	2.40198	6.71021e-07	1.49027e+06	0.145369	0.0542214	0.295738
5259100	6080200	5316100	4972800	5374700	5754600	4142600	4358800	6172700	6512200	5382000	1	8733200	8859000	5008000	4545700	6265300	4728500	3	P36873-2;F8W0W8;P36873;F8VYE8;P62136-2;P62136-3;F8VR82	P36873-2;F8W0W8;P36873;F8VYE8;P62136-2;P62136-3	Serine/threonine-protein phosphatase;Serine/threonine-protein phosphatase PP1-gamma catalytic subunit	PPP1CC	7	0.81106	1.1643	0.696605	1.43553	0.316954	0.156986	0.302699
10224000	11056000	7184500	7718800	11804000	11016000	5365200	6128100	6547800	6492400	5152200	1	9894200	7281100	6976200	6654400	6823300	7160000	3	F8VZQ9;P82979;H0YHG0;Q567R9;F8VS12	F8VZQ9;P82979;H0YHG0;Q567R9	SAP domain-containing ribonucleoprotein	SARNP;CIP29	5	0.503119	0.759097	0.662787	1.50878	0.00345307	0.0501996	0.028524
20713000	15700000	17630000	21462000	9032600	9855100	46456000	35644000	36538000	26186000	47099000	40697000	28824000	33141000	29757000	28292000	27471000	26814000	2	P56270-2;P56270;P56270-3;I3L2Z5;H3BQI4;H3BQD6;H3BQS2;I3L0M3;I3L4Y2;H3BPU3;I3L411	P56270-2;P56270;P56270-3;I3L2Z5;H3BQI4;H3BQD6;H3BQS2;I3L0M3;I3L4Y2;H3BPU3;I3L411	Myc-associated zinc finger protein	MAZ	11	2.46439	1.84653	1.3346	0.749286	0.000136522	0.0150932	0.000209194
27544000	23625000	7132600	3643700	51797000	58085000	63036000	46405000	37070000	42235000	1	1	158350000	164380000	64918000	70037000	72335000	87949000	4	J3QQX2;P52565;J3KTF8;J3KRE2;J3KRY1;P52565-2;J3KS60	J3QQX2;P52565;J3KTF8;J3KRE2;J3KRY1;P52565-2;J3KS60	Rho GDP-dissociation inhibitor 1	ARHGDIA	7	1.09846	3.59645	0.30543	3.27408	0.84421	0.00767533	0.00513918
344420000	361720000	139320000	138140000	169110000	185610000	227550000	226290000	152400000	154090000	176250000	177400000	267500000	251810000	190630000	188960000	244240000	250300000	14	P09651;P09651-2;F8W6I7;P09651-3;F8VZ49;H0YH80;F8VTQ5;F8W646;F8VYN5;Q32P51	P09651;P09651-2;F8W6I7;P09651-3;F8VZ49;H0YH80;F8VTQ5	Heterogeneous nuclear ribonucleoprotein A1	HNRNPA1	10	0.832372	1.04119	0.799446	1.25087	0.415631	0.0377722	0.838959
4535100	4322200	4835700	4535700	15764000	17535000	1	6748700	1	1	1	1	22370000	12496000	7269000	8333600	11006000	12308000	7	P35580-4;P35580-3;F8W6L6;P35580-2;P35580	P35580-4;P35580-3;F8W6L6;P35580-2;P35580	Myosin-10	MYH10	5	0.130972	1.4319	0.0914674	10.9329	0.0235451	0.00108382	0.296924
21401000	53177000	13706000	22429000	26500000	34398000	47363000	60248000	63619000	47054000	82494000	27830000	63534000	81008000	57163000	58940000	58079000	61737000	5	P49915;F8W720	P49915;F8W720	GMP synthase [glutamine-hydrolyzing]	GMPS	2	1.91484	2.217	0.86371	1.1578	0.0196808	0.327827	0.000412014
6853800	6631600	5487100	3846800	9864100	8513200	9378700	7398800	9449800	8318300	7636300	7577700	19152000	16971000	9336100	9486400	10530000	10835000	3	Q14157-5;Q14157;F8W726;Q14157-3;Q14157-1;Q14157-4;Q5VU77;Q5VU78;Q5VU79;Q5VU80;Q5VU81;H7C2T8;H0Y5H6	Q14157-5;Q14157;F8W726;Q14157-3;Q14157-1;Q14157-4;Q5VU77;Q5VU78;Q5VU79;Q5VU80;Q5VU81	Ubiquitin-associated protein 2-like	UBAP2L	13	1.20786	1.85235	0.652068	1.53358	0.163638	0.0314215	0.0128405
332450000	379110000	521600000	429870000	518710000	450490000	514810000	609940000	495510000	597910000	408870000	362760000	559470000	509000000	548980000	670270000	575580000	556670000	9	F8W727;P62910;D3YTB1;D3YTI8	F8W727;P62910;D3YTB1	60S ribosomal protein L32	RPL32	4	1.13584	1.29927	0.874218	1.14388	0.267774	0.150417	0.00598913
1966600	1	1	1	2787500	3143300	1	1	1	1	1	1	1	1	1	1	1	1	2	Q9P2E9;Q9P2E9-2;Q9P2E9-3;F8W7S5	Q9P2E9;Q9P2E9-2;Q9P2E9-3;F8W7S5	Ribosome-binding protein 1	RRBP1	4	7.59743e-07	7.59743e-07	1	1	0.0559565	#DIV/0!	0.0559565
4517700	7057900	6299400	1	6180100	5328600	1	1	1	1	1	8823500	1	1	1	1	1	9621900	3	O75150;H3BP71;O75150-4;F8W8Z4;O75150-3;I3L332;H3BUL6;H3BQ99	O75150;H3BP71;O75150-4;F8W8Z4;O75150-3	E3 ubiquitin-protein ligase BRE1B	RNF40	8	0.300286	0.327457	0.917023	1.09049	0.0864703	0.95244	0.11579
14972000	15283000	13222000	12644000	1	15965000	27864000	25262000	23461000	27231000	18309000	20468000	34054000	31700000	31714000	31544000	21579000	31653000	5	Q15417;F8WA86;B4DFK6;E9PDU6;B4DUT8;Q99439;B4DDF4;Q99439-2;K7ES69	Q15417;F8WA86;B4DFK6	Calponin-3	CNN3	9	1.97812	2.52815	0.78244	1.27805	0.00233695	0.0193769	0.000128004
9903700	10003000	7030000	8349800	11011000	9727100	1	1	1	1	10036000	1	9372700	1	1	1	1	1	2	Q9NQ50;F8WBK5	Q9NQ50;F8WBK5	39S ribosomal protein L40, mitochondrial	MRPL40	2	0.179136	0.167296	1.07077	0.933908	0.0014867	0.962426	0.000883083
155450000	110010000	112430000	146570000	80933000	63283000	34664000	25762000	27900000	28104000	24946000	21846000	31289000	35223000	28486000	28042000	29499000	26633000	5	P59998-3;F8WCF6;P59998;P59998-2;F8WDD7;H7C0A3	P59998-3;F8WCF6;P59998;P59998-2;F8WDD7;H7C0A3	Actin-related protein 2/3 complex subunit 4	ARPC4;ARPC4-TTLL3	6	0.244097	0.26795	0.910979	1.09772	0.000194042	0.245655	0.000242326
1770500000	1928200000	2230000000	2186800000	1131500000	1274500000	737520000	659160000	765110000	800790000	888950000	952420000	280960000	254550000	575530000	520910000	486110000	607500000	39	G3V0I6	G3V0I6		OTUD4	1	0.456584	0.259047	1.76256	0.567358	0.000590497	0.00097083	6.35985e-05
12711000	15529000	5397200	7705000	17710000	17925000	18294000	19132000	10336000	7866100	7915100	8880100	16717000	26309000	15989000	16913000	11258000	14677000	3	G3V5Z7;P60900;G3V295;B4DXJ9;G3V3I1;G3V3U4;B4DQR4	G3V5Z7;P60900;G3V295;B4DXJ9;G3V3I1;G3V3U4	Proteasome subunit alpha type;Proteasome subunit alpha type-6	PSMA6	7	0.940841	1.32329	0.710987	1.40649	0.807241	0.128391	0.192851
9870500	10629000	1	10258000	18425000	12021000	1	1	1	1	1	1	1	1	1	1	1	1	2	G3V2S9;Q9GZT3;Q9GZT3-2;G3V4X6;H0YJ40;H0YJW7;H0YJI1	G3V2S9;Q9GZT3;Q9GZT3-2;G3V4X6;H0YJ40;H0YJW7;H0YJI1	SRA stem-loop-interacting RNA-binding protein, mitochondrial	SLIRP	7	9.80336e-08	9.80336e-08	1	1	0.0017722	#DIV/0!	0.0017722
281900000	286190000	168720000	170300000	511700000	438990000	441600000	374710000	323240000	347960000	171330000	182750000	971880000	1088000000	549260000	631700000	667110000	475180000	20	P06576;F8VPV9;H0YH81;F8W079;F8W0P7;F8VQY0;H0YI37	P06576;F8VPV9;H0YH81;F8W079	ATP synthase subunit beta, mitochondrial;ATP synthase subunit beta	ATP5B	7	0.991275	2.35931	0.420154	2.38008	0.970911	0.00302698	0.00436607
23205000	26905000	16236000	15216000	14403000	19030000	20529000	19580000	25815000	23098000	33116000	30709000	16764000	14174000	23143000	25091000	26591000	23687000	5	G3V3A4;Q13573;G3V4X8	G3V3A4;Q13573;G3V4X8	SNW domain-containing protein 1	SNW1	3	1.32916	1.1257	1.18074	0.846925	0.0633385	0.225289	0.419339
4486200	7760700	3307800	3105800	8945100	15020000	6331700	6101100	8653600	10237000	13526000	1	9903500	9741300	8015200	3170400	4562100	5252000	1	Q9H3N1;G3V448	Q9H3N1;G3V448	Thioredoxin-related transmembrane protein 1	TMX1	2	1.05217	0.953523	1.10346	0.906244	0.890969	0.756487	0.88323
405670000	380570000	180530000	166840000	791920000	791260000	775140000	739180000	502360000	511250000	262070000	254340000	1803700000	1635300000	824880000	802010000	904930000	966860000	43	P07900-2;P07900;Q86U12;G3V2J8;Q14568;Q58FG0;Q58FG1	P07900-2;P07900;Q86U12	Heat shock protein HSP 90-alpha	HSP90AA1	7	1.12057	2.55363	0.438812	2.27888	0.716923	0.00947305	0.00822085
6497900	8321500	13613000	8127300	1	1	3145300	1	1	1	1	1	1	1	1	1	1	1	2	P61244;P61244-2;G3V5L1;P61244-4;G3V2R5;G3V563;P61244-3;Q6V3B1;G3V570	P61244;P61244-2;G3V5L1;P61244-4;G3V2R5;G3V563;P61244-3;Q6V3B1;G3V570	Protein max	MAX	9	0.086032	1.64115e-07	524218	1.90761e-06	0.031195	0.340893	0.0181621
13452000	10827000	14531000	12857000	10880000	12516000	6342600	1	9796700	7264200	1	6009700	1	1	1	1	6828100	4620600	53	G3V5W5;B4DX49;B4DV00;H7BZ44;H0YJD3;H0YJ77;G3V5T6;G3V2F5;H0YJY6;G3V507	G3V5W5;B4DX49;B4DV00		PRMT5	10	0.391847	0.152521	2.56913	0.389237	0.00142796	0.176318	1.62197e-05
88201000	109770000	65699000	80433000	71321000	65701000	59993000	71792000	114970000	97627000	119660000	178950000	59240000	47148000	98524000	64809000	84196000	96204000	4	Q5BKY9;G3XAI9;Q8N9E0;Q5BKY9-2	Q5BKY9;G3XAI9;Q8N9E0;Q5BKY9-2	Protein FAM133B;Protein FAM133A	FAM133B;FAM133A	4	1.33643	0.935559	1.42849	0.700041	0.177507	0.126446	0.649641
1	3059500	1	837890000	1	1	1	1	1	1	1	27074000	1	1	1	1	1	1	1	P49761-1;G5E959;P49761-3;H3BVF8;H3BUL5;P49761-2;H3BQR7;H3BRT8	P49761-1;G5E959;P49761-3;H3BVF8;H3BUL5;P49761-2;H3BQR7;H3BRT8		CLK3	8	0.0321946	7.13479e-09	4.51233e+06	2.21615e-07	0.354195	0.340893	0.33888
55839000	45213000	53003000	57287000	36506000	39461000	37823000	27658000	28199000	27005000	23601000	26733000	26481000	26159000	26967000	28331000	32789000	26942000	6	P82650;G5E9V5;G5E9W7;H7C5H3;Q9H3I1;H7C5F2;H7C5L9	P82650;G5E9V5;G5E9W7;H7C5H3;Q9H3I1;H7C5F2	28S ribosomal protein S22, mitochondrial	MRPS22	7	0.595244	0.583584	1.01998	0.980412	0.000797383	0.806604	0.000322459
16753000	10697000	12711000	20990000	18905000	15738000	1	1	25073000	8701100	1	18586000	29804000	26148000	19639000	1	17462000	20615000	1	Q9UKF6;G5E9W3	Q9UKF6;G5E9W3	Cleavage and polyadenylation specificity factor subunit 3	CPSF3	2	0.546591	1.18659	0.460641	2.17089	0.155396	0.126467	0.522796
50161000	61479000	14231000	11762000	96215000	93327000	79961000	93292000	85924000	79089000	22771000	22465000	165410000	161560000	160870000	153800000	134270000	141880000	6	P06454;P06454-2;B8ZZQ6;H7C2N1;B8ZZW7;B8ZZA1	P06454;P06454-2;B8ZZQ6;H7C2N1;B8ZZW7;B8ZZA1	Prothymosin alpha;Thymosin alpha-1	PTMA	6	1.17216	2.8052	0.417854	2.39318	0.648984	9.01039e-05	9.9592e-05
2905000000	3014900000	3623100000	3834900000	2801800000	2378900000	1951500000	1774400000	2121300000	2068900000	2263600000	2192500000	1101800000	1181600000	1676100000	1577700000	1477000000	1510700000	22	G8JLB6;P31943;E9PCY7;D6RBM0;D6RIU0;D6RIT2;D6RIH9;D6RJ04;D6RDU3;D6RFM3;D6R9T0;D6RAM1;E7EQJ0;H0YB39;E7EN40;E5RGV0;D6RDL0;H0YBD7;H0YBG7;F5GZT4;H0YAQ2;E5RGH4;D6RF17;D6R9D3;E5RJ94	G8JLB6;P31943;E9PCY7;D6RBM0;D6RIU0;D6RIT2;D6RIH9;D6RJ04;D6RDU3;D6RFM3;D6R9T0;D6RAM1;E7EQJ0	Heterogeneous nuclear ribonucleoprotein H;Heterogeneous nuclear ribonucleoprotein H, N-terminally processed	HNRNPH1	25	0.666656	0.45935	1.4513	0.689037	0.00127045	0.000283195	3.85913e-05
18505000	16671000	13318000	14677000	20655000	22365000	26893000	34900000	22748000	22660000	23301000	18785000	39443000	28185000	31067000	30228000	40662000	40753000	5	Q00341;Q00341-2;H0Y394;H7C2D1;H7C0A4;H7BZC3	Q00341;Q00341-2;H0Y394	Vigilin	HDLBP	6	1.40583	1.98075	0.709748	1.40895	0.022754	0.0112436	9.29143e-05
1	1	1	1	1	1	176140000	1	178580000	181370000	213360000	234020000	1	194810000	258950000	252510000	174700000	1	1	H7BY68;H0Y3C2;H0Y6C9	H7BY68;H0Y3C2;H0Y6C9		NBPF9	3	1.63912e+08	1.46828e+08	1.11635	0.895777	0.000717213	0.778491	0.0124408
51203000	57930000	36878000	43045000	103920000	126550000	96417000	120910000	75284000	81558000	86327000	79693000	120150000	142680000	121250000	96924000	115180000	121940000	8	P12268;H0Y4R1;E7ETK5;P20839-6;P20839-5;P20839-7;P20839-3;E7EQS0;P20839;C9J381;P20839-4;P20839-2;C9K0R9	P12268;H0Y4R1	Inosine-5-monophosphate dehydrogenase 2	IMPDH2	13	1.28762	1.71175	0.752222	1.32939	0.248372	0.0085402	0.0113059
69826000	66748000	60958000	60209000	49078000	53182000	69065000	100850000	87846000	116720000	71842000	85161000	54849000	69803000	82499000	98498000	90594000	92960000	6	J3KQN4;H0Y5B4;H7BZ11;P83881;H0Y3V9;H7BY91;R4GN19;F5GYZ4	J3KQN4;H0Y5B4;H7BZ11;P83881;H0Y3V9;H7BY91;R4GN19	60S ribosomal protein L36a	RPL36A	8	1.47634	1.35889	1.08643	0.920447	0.00510915	0.494742	0.0159712
1	1	1	1	3839000	4434700	1	1	1	1	1	1	6294800	1	1	5032200	1	1	2	Q7Z6Z7;Q7Z6Z7-3;Q7Z6Z7-2;H0Y5W0	Q7Z6Z7;Q7Z6Z7-3;Q7Z6Z7-2;H0Y5W0	E3 ubiquitin-protein ligase HUWE1	HUWE1	4	7.25189e-07	1.36904	5.29708e-07	1887834	0.146328	0.148276	0.739689
421890000	369400000	343720000	347080000	167310000	177400000	148770000	177160000	179980000	227120000	161590000	223330000	69038000	128090000	137980000	178790000	94127000	116420000	13	Q9UPQ9;Q9UPQ9-1;H0Y720;Q9UPQ9-2	Q9UPQ9;Q9UPQ9-1;H0Y720	Trinucleotide repeat-containing gene 6B protein	TNRC6B	4	0.611972	0.396565	1.54318	0.648012	0.0260708	0.00888709	0.00253754
1	1	3769400	3852600	3353200	3029200	3351000	1	1	1	5414600	1	1	1	1	1	1	1	7	H0Y731	H0Y731		KCTD17	1	0.625918	4.28437e-07	1460934	6.84494e-07	0.489957	0.159664	0.010864
57985000	57649000	12340000	20142000	135420000	134920000	127900000	147440000	127120000	93688000	21519000	27036000	340050000	304480000	134650000	140890000	204760000	190980000	8	E5RJD8;O75347;E5RIW3;E5RHG6;B4DT30;E5RIX8	E5RJD8;O75347;E5RIW3;E5RHG6;B4DT30	Tubulin-specific chaperone A	TBCA	6	1.3017	3.14444	0.413968	2.41565	0.516579	0.0108959	0.00456896
3126200	2803100	5256900	5677900	6681800	5617900	8593100	14728000	16334000	1	12381000	1	7686900	18197000	13404000	14144000	5830900	11909000	3	O00410-3;H0Y8C6;O00410;O00410-2;B4E0R6;E7ETV3;C9JMV5;E7EV12;E7ETV8;E7EQT5;E7EX05;E7EWK4;E7ESZ1;E7ESA1;C9JQT6;C9J875;C9JZD8	O00410-3;H0Y8C6;O00410;O00410-2;B4E0R6	Importin-5	IPO5	17	1.78427	2.44042	0.731134	1.36774	0.233816	0.379583	0.00484956
15674000	13303000	8999400	10336000	17424000	42893000	18474000	17967000	13165000	17082000	8609200	1	70663000	71042000	25608000	27782000	22904000	20155000	6	P49736;H0Y8E6	P49736;H0Y8E6	DNA replication licensing factor MCM2	MCM2	2	0.693157	2.19235	0.31617	3.16285	0.368865	0.0253186	0.0817208
8522900	11164000	11032000	10729000	10191000	7314100	7182100	5050700	7527200	7340400	6858600	4682000	5412000	4617200	7067800	6833100	6383600	4792600	1	Q9BYD6;H0Y8N7	Q9BYD6;H0Y8N7	39S ribosomal protein L1, mitochondrial	MRPL1	2	0.655454	0.595496	1.10069	0.908525	0.00197259	0.397107	0.000422266
1	1	1	1	1	1	1	1	1	1	1	1	1	1	1	1	1	1	1	H0Y9F3	H0Y9F3		THAP9	1	1	1	1	1	#DIV/0!	#DIV/0!	#DIV/0!
15047000	17391000	22843000	16752000	10403000	7543700	1	1	1	1	1	1	1	1	12197000	1	9993700	1	3	O15013;O15013-6;O15013-5;O15013-4;O15013-7;H0YAN8	O15013;O15013-6;O15013-5;O15013-4;O15013-7;H0YAN8	Rho guanine nucleotide exchange factor 10	ARHGEF10	6	6.66817e-08	0.246619	2.70383e-07	3.69845e+06	4.89439e-05	0.147586	0.0057797
22240000	25219000	20785000	22061000	7870500	6735200	9184900	10253000	11642000	9959700	1	13366000	5493300	5266500	5661300	9218700	9102800	8676300	2	O14893;O14893-2;O14893-3;H0YEL0;H0YDP6;G5EA29	O14893;O14893-2;O14893-3;H0YEL0;H0YDP6;G5EA29	Gem-associated protein 2	GEMIN2	6	0.51859	0.413865	1.25304	0.798059	0.0508023	0.39693	0.0124792
1	3027500	1	1	8310100	6782100	1	1	1	1	1	1	1	54981000	5934700	10128000	6533100	4867400	1	Q9NRR5;Q9UMX0;Q9UMX0-2;H0YDS0	Q9NRR5;Q9UMX0;Q9UMX0-2;H0YDS0	Ubiquilin-4;Ubiquilin-1	UBQLN4;UBQLN1	4	3.31131e-07	4.54998	7.27765e-08	1.37407e+07	0.0753541	0.131082	0.235464
12077000	25805000	15697000	21548000	19200000	23820000	32832000	32587000	47196000	33730000	1	11886000	39937000	26676000	10710000	17338000	60587000	43156000	2	O60232;H0YEB6;G3V1B8;H0YEK1;E9PK41	O60232;H0YEB6;G3V1B8;H0YEK1;E9PK41	Sjoegren syndrome/scleroderma autoantigen 1	SSSCA1	5	1.33927	1.6793	0.797519	1.25389	0.382618	0.529369	0.117243
9832900	6659400	7614700	8605300	1	2657000	5696500	5206000	1	1	1	1	5041600	6504400	1	6854900	1	4918600	1	Q9Y2Z4;H0YHS6	Q9Y2Z4;H0YHS6	Tyrosine--tRNA ligase, mitochondrial	YARS2	2	0.308248	0.659315	0.467527	2.13891	0.0603879	0.254759	0.338801
17120000	20148000	19011000	15129000	11050000	15489000	1	1	1	1	1	1	1	1	1	1	1	1	1	Q13242;S4R3G0;H0YIB4	Q13242;S4R3G0;H0YIB4	Serine/arginine-rich splicing factor 9	SRSF9	3	6.12576e-08	6.12576e-08	1	1	2.22841e-07	#DIV/0!	2.22841e-07
8555800	6201700	2670600	3428300	2788700	2600000	1645300	1	1	1	1	1	1	4185700	1	1	1	1	2	Q6PJT7;Q6PJT7-2;Q6PJT7-9;Q6PJT7-5;H0YJA2;G3V256;Q6PJT7-3;Q6PJT7-4;G3V411;G3V5I6;G3V3Y4;G3V4R5	Q6PJT7;Q6PJT7-2;Q6PJT7-9;Q6PJT7-5;H0YJA2;G3V256;Q6PJT7-3;Q6PJT7-4;G3V411;G3V5I6;G3V3Y4;G3V4R5	Zinc finger CCCH domain-containing protein 14	ZC3H14	12	0.06269	0.159485	0.393077	2.54403	0.00278975	0.584621	0.0132127
10378000	11320000	7440900	6901200	42387000	39248000	33018000	17519000	22410000	23699000	15851000	19575000	64558000	55738000	32202000	29390000	22926000	21983000	4	P33316;H0YKC5;H0YNW5;P33316-2;H0YKI0;H0YNJ9;H0YMM5;H0YMP1	P33316;H0YKC5;H0YNW5;P33316-2;H0YKI0;H0YNJ9;H0YMM5;H0YMP1	Deoxyuridine 5-triphosphate nucleotidohydrolase, mitochondrial	DUT	8	1.12234	1.92732	0.582336	1.71722	0.745899	0.0688241	0.0979694
3974300	3498800	1	1321600	4783600	4861500	8398400	1	1	8745400	1	1	25694000	1	1	11324000	12998000	1	2	P13804;H0YLU7;H0YKF0;P13804-2;H0YNX6;H0YL12;H0YK49;J3KN60	P13804;H0YLU7;H0YKF0;P13804-2;H0YNX6;H0YL12;H0YK49;J3KN60	Electron transfer flavoprotein subunit alpha, mitochondrial	ETFA	8	0.929717	2.71239	0.342766	2.91744	0.915306	0.262432	0.251176
14359000	23798000	15432000	16106000	36643000	39893000	39766000	65181000	32319000	36848000	18461000	1	114060000	123990000	41983000	37644000	73090000	74449000	6	K7ELL7;P14314;P14314-2;K7EPW7;K7EJ70;K7EKX1	K7ELL7;P14314;P14314-2	Glucosidase 2 subunit beta	PRKCSH	6	1.31692	3.18138	0.413948	2.41577	0.460093	0.0239877	0.00595898
302740000	258560000	287010000	258220000	209790000	204010000	299860000	320920000	328170000	327600000	381180000	463820000	289560000	249010000	339990000	297100000	339290000	379360000	20	H3BLZ8;Q92841;Q92841-3;Q92841-2;Q92841-1;C9JMU5;G5E9L5	H3BLZ8;Q92841;Q92841-3;Q92841-2;Q92841-1;C9JMU5	Probable ATP-dependent RNA helicase DDX17	DDX17	7	1.39545	1.24599	1.11996	0.89289	0.00683483	0.25009	0.0313851
127040000	152760000	158160000	166750000	79830000	105830000	32348000	26124000	14128000	21672000	74681000	24520000	24742000	16000000	24148000	26460000	26613000	16456000	4	Q15287;H3BTC0;H3BMM9;Q15287-2;Q15287-3;H3BMS0;H3BV80;H3BPG5	Q15287;H3BTC0;H3BMM9;Q15287-2;Q15287-3;H3BMS0;H3BV80;H3BPG5	RNA-binding protein with serine-rich domain 1	RNPS1	8	0.244788	0.170071	1.43933	0.694769	0.000122389	0.302308	1.44638e-05
5477300	9023100	3084100	3100300	10296000	10584000	1	14047000	11257000	12973000	6192700	7701600	17734000	6692600	11062000	13061000	13533000	18892000	3	P13073;H3BNV9;H3BN72;Q86WV2;H3BNI5;H3BPG0	P13073;H3BNV9;H3BN72;Q86WV2;H3BNI5	Cytochrome c oxidase subunit 4 isoform 1, mitochondrial	COX4I1	6	1.25518	1.94815	0.644292	1.55209	0.505978	0.117648	0.0174528
6912300	7925400	12386000	1	1	14539000	9701900	11170000	8699700	10437000	1	1	33221000	32264000	9731300	9050300	11959000	15442000	3	H3BNX8;P20674;H3BV69;H3BRM5;H3BRI0	H3BNX8;P20674;H3BV69;H3BRM5	Cytochrome c oxidase subunit 5A, mitochondrial	COX5A	5	0.957998	2.67386	0.358283	2.79109	0.930596	0.0392037	0.0487189
108810000	71255000	67216000	60385000	51049000	62565000	109780000	76608000	76787000	50572000	153890000	113690000	79938000	53727000	71722000	67054000	87275000	64060000	4	H3BPE7;P35637;P35637-2	H3BPE7;P35637;P35637-2	RNA-binding protein FUS	FUS	3	1.37991	1.00592	1.37178	0.72898	0.147917	0.124692	0.966067
4857200	5241000	2535900	3114800	5495700	6365900	11731000	12364000	14867000	15187000	16053000	17230000	30548000	19847000	17641000	21823000	33837000	19323000	4	P23193;P23193-2;B7Z4S1;E5RIS7;E5RJ93;Q15560;Q15560-2;Q5JRI7	P23193;P23193-2;B7Z4S1;E5RIS7;E5RJ93	Transcription elongation factor A protein 1	TCEA1	8	3.16662	5.17988	0.611331	1.63577	2.71404e-06	0.00898518	4.31012e-05
6093300	6434400	7728400	6937700	13998000	14382000	19777000	17520000	14609000	7989500	9624900	11021000	42287000	38295000	17743000	19630000	19711000	20292000	3	P22695;H3BRG4;H3BSJ9;H3BP04;H3BUI9;H3BUE4	P22695;H3BRG4;H3BSJ9	Cytochrome b-c1 complex subunit 2, mitochondrial	UQCRC2	6	1.44927	2.84231	0.509891	1.9612	0.122664	0.0238295	0.00478549
1	1	3962400	3798000	1	2532700	1	1	1	1	1	1	1	1	1	2823800	1	1	2	Q9H5H4;H3BS42	Q9H5H4;H3BS42	Zinc finger protein 768	ZNF768	2	5.82915e-07	0.27434	2.12479e-06	470634	0.0558848	0.340893	0.206917
1	1	1	1	8113300	9743300	10953000	10248000	10588000	12557000	12783000	1	17498000	13324000	11368000	16801000	17538000	21970000	2	Q9UNE7;Q9UNE7-2;H3BS86;H3BUD0	Q9UNE7;Q9UNE7-2;H3BS86;H3BUD0	E3 ubiquitin-protein ligase CHIP	STUB1	4	3.19932	5.51611	0.579996	1.72415	0.0368715	0.0189873	0.000244876
3158600	2853300	4575800	6255900	4583900	1	5243000	1	1	1	1	1	5785400	5010400	1	4134700	6641500	5147300	2	P19784;H3BSA1	P19784;H3BSA1	Casein kinase II subunit alpha	CSNK2A2	2	0.244686	1.24696	0.196225	5.09618	0.0535025	0.0198836	0.509892
8772200	11586000	8068100	7701500	14659000	12938000	13031000	18440000	18078000	19275000	21220000	18219000	17825000	11150000	18234000	11323000	17669000	17778000	3	Q8WWM7-3;Q8WWM7;H3BUF6;Q8WWM7-2;Q8WWM7-9;Q8WWM7-4;Q8WWM7-5;Q8WWM7-8;Q8WWM7-6;Q8WWM7-7;H3BSK9	Q8WWM7-3;Q8WWM7;H3BUF6;Q8WWM7-2;Q8WWM7-9;Q8WWM7-4;Q8WWM7-5;Q8WWM7-8;Q8WWM7-6;Q8WWM7-7;H3BSK9	Ataxin-2-like protein	ATXN2L	11	1.69891	1.47476	1.15199	0.868062	0.000974122	0.212582	0.0200901
5264800	9974000	8983300	8159800	11223000	5352500	3133000	3889200	3695000	3588100	4716400	5726000	1	7895400	1	8232400	6628200	5237700	1	Q7Z2W9;H3BUY0;Q7Z2W9-2	Q7Z2W9;H3BUY0;Q7Z2W9-2	39S ribosomal protein L21, mitochondrial	MRPL21	3	0.505495	0.571797	0.884045	1.13116	0.00355546	0.739802	0.0853302
15122000	7998000	7027100	10876000	10244000	8598000	18917000	17396000	13441000	20531000	19774000	30837000	20662000	14828000	23777000	28541000	17226000	17758000	4	Q9UNF1;H7BXW3;Q9UNF1-2;Q5H909;Q5H907	Q9UNF1;H7BXW3;Q9UNF1-2;Q5H909;Q5H907	Melanoma-associated antigen D2	MAGED2	5	2.01947	2.05114	0.984559	1.01568	0.00326424	0.92165	0.00126243
18060000	18386000	20543000	18127000	14974000	13119000	10529000	10472000	9415100	1	1	21499000	12849000	10752000	11511000	1	8828200	14319000	6	Q7L2E3-2;Q7L2E3;H7BXY3;Q7L2E3-3	Q7L2E3-2;Q7L2E3;H7BXY3;Q7L2E3-3	Putative ATP-dependent RNA helicase DHX30	DHX30	4	0.503009	0.564478	0.891106	1.1222	0.0328298	0.791004	0.00978378
1	1	1	1	3662300	3396700	1	4880900	1	4471500	1	1	5655400	5406300	5456900	1	1	1	1	P23919;H7BZ20;H7C312	P23919;H7BZ20;H7C312	Thymidylate kinase	DTYMK	3	1.32489	2.34008	0.566174	1.76624	0.763612	0.466719	0.299059
1	13917000	1	1	25443000	20834000	16258000	1	1	1	1	1	1	27897000	21042000	1	1	1	3	H7BZJ3	H7BZJ3	Thioredoxin	PDIA3	1	0.270093	0.813021	0.33221	3.01015	0.20886	0.377163	0.795717
13974000	14268000	5341300	1	43412000	41416000	16729000	20610000	18979000	6333100	8368500	7787300	66447000	111140000	28868000	24730000	34725000	46472000	3	H7BZT4;P61956;P61956-2;A8MU27;B4DUW4;A8MUA9;P55854;Q6EEV6	H7BZT4;P61956;P61956-2	Small ubiquitin-related modifier 2	SUMO2	8	0.665535	2.63811	0.252277	3.96389	0.425148	0.0166307	0.0604559
51712000	51861000	30289000	81763000	62785000	65094000	98744000	81471000	90701000	84257000	99248000	65941000	283840000	373120000	215320000	1	50984000	64532000	1	Q9C037;Q9C037-2;Q9C037-3;H7C0Q6	Q9C037;Q9C037-2;Q9C037-3;H7C0Q6	Tripartite motif-containing protein 4	TRIM4	4	1.51486	2.87565	0.526791	1.89829	0.00683648	0.229319	0.10903
9417300	11791000	8243700	8214400	6840500	4775200	5660000	6102800	5795600	4507800	5868900	6817400	4417400	4163600	4124100	4280900	4242900	4191300	2	H7C2Q8;Q99848	H7C2Q8;Q99848	Probable rRNA-processing protein EBP2	EBNA1BP2	2	0.705175	0.51581	1.36712	0.731464	0.0379023	0.000518612	0.00209104
7327900	6494600	1	1	10722000	10698000	14100000	17868000	15294000	11330000	12020000	10099000	17913000	12984000	12230000	3912500	15215000	24251000	3	Q9Y5M8;H7C4H2	Q9Y5M8;H7C4H2	Signal recognition particle receptor subunit beta	SRPRB	2	2.29016	2.45458	0.933016	1.07179	0.00818217	0.7532	0.0304219
1	1	1	1	1	1	1	1	1	1	1	1	7218700	1	7195100	1	1	7210500	3	I1E4Y6;Q6Y7W6-3;Q6Y7W6;Q6Y7W6-4;E9PC50;E7ESB6;C9JH18	I1E4Y6;Q6Y7W6-3;Q6Y7W6;Q6Y7W6-4;E9PC50;E7ESB6	PERQ amino acid-rich with GYF domain-containing protein 2	GIGYF2	7	1	3.60405e+06	2.77466e-07	3.60405e+06	#DIV/0!	0.0493325	0.0493325
4359100	4213900	3362300	1	6091400	5838500	18956000	21498000	22357000	25443000	26066000	30573000	16037000	15510000	26481000	27004000	25273000	21871000	2	Q02978;I3L1P8;Q02978-2	Q02978;I3L1P8;Q02978-2	Mitochondrial 2-oxoglutarate/malate carrier protein	SLC25A11	3	6.07131	5.53844	1.09621	0.912232	9.106e-07	0.449283	1.35935e-05
1	1	1	1	1	1	12957000	11172000	6449700	7037800	1	8675700	6787400	1	8216800	10614000	9757800	6096300	1	I3L1Y9;Q96CP2;I3L4I0	I3L1Y9;Q96CP2;I3L4I0	FLYWCH family member 2	FLYWCH2	3	7.71537e+06	6.91205e+06	1.11622	0.895881	0.00187094	0.745528	0.00121073
22699000	18276000	20633000	19521000	11274000	9673200	5735100	11950000	6987100	7031800	8024800	10389000	4239400	4680000	5893900	6203100	5572300	10380000	3	P57678;I3L2C7	P57678;I3L2C7	Gem-associated protein 4	GEMIN4	2	0.490984	0.362168	1.35568	0.737636	0.00437641	0.126196	0.000925154
268160000	272460000	117390000	145270000	499730000	489040000	445440000	368240000	377250000	356690000	202080000	232900000	673300000	729030000	610860000	445950000	520050000	509160000	9	I3L504;P63241-2;P63241;I3L397;Q6IS14;Q9GZV4;C9J4W5;C9J7B5;F8WCJ1	I3L504;P63241-2;P63241;I3L397;Q6IS14;Q9GZV4;C9J4W5;C9J7B5;F8WCJ1	Eukaryotic translation initiation factor 5A-1;Eukaryotic translation initiation factor 5A-1-like;Eukaryotic translation initiation factor 5A-2	EIF5A;EIF5AL1;EIF5A2	9	1.10633	1.94657	0.568349	1.75948	0.688988	0.00154992	0.00550396
1	2060500	1448800	1576000	1	1	1	1	1879300	2165100	1	1851500	4056800	1	2231100	1	1955300	1	1	J3KN16;Q5VYK3;R4GMY1	J3KN16;Q5VYK3;R4GMY1	Proteasome-associated protein ECM29 homolog	ECM29	3	1.1594	1.62099	0.715244	1.39812	0.822908	0.640382	0.517358
23018000	23238000	23926000	19400000	18696000	20489000	8825200	14363000	18085000	19587000	27279000	23140000	8801600	10020000	16285000	13172000	11427000	12938000	4	J3KNN5;Q9UJV9	J3KNN5;Q9UJV9	Probable ATP-dependent RNA helicase DDX41	DDX41	2	0.86419	0.564148	1.53185	0.652805	0.322371	0.0481678	5.77521e-05
1	1	1	1	1	1	9191300000	9978500000	10487000000	13739000000	14904000000	17219000000	7960800000	6984700000	12228000000	10981000000	11313000000	13946000000	2	J3KNP3;O75094;O75094-3;O75094-2	J3KNP3;O75094;O75094-3;O75094-2	Slit homolog 3 protein	SLIT3	4	1.25865e+10	1.05689e+10	1.19089	0.839705	2.17393e-06	0.259429	1.82314e-06
80243000	63100000	64001000	60408000	97523000	79911000	111940000	106780000	120620000	119950000	178170000	161210000	102800000	111560000	129960000	126050000	120420000	139310000	6	Q01130;J3KP15;B4DN89;J3QL05;Q9BRL6;Q9BRL6-2	Q01130;J3KP15;B4DN89;J3QL05	Serine/arginine-rich splicing factor 2	SRSF2;SFRS2	6	1.79401	1.63999	1.09392	0.914145	0.0012869	0.403511	0.000135057
113730000	112880000	55372000	50848000	187530000	175450000	218560000	209060000	164040000	145500000	130720000	113130000	322960000	316480000	231060000	225340000	244030000	248130000	15	J3KPX7;Q99623;F5GY37;Q99623-2;F5GWA7;F5H3X6;F5H0C5;F5H2D2;U3KPZ5	J3KPX7;Q99623;F5GY37;Q99623-2;F5GWA7;F5H3X6	Prohibitin-2	PHB2	9	1.40988	2.28223	0.617764	1.61874	0.134955	0.00223684	0.000501647
3484800	3788800	3923700	3126500	2702800	2921900	1	1	1	1	2503100	3993500	2785900	1	1	2808600	1	1	2	J3KPZ3;O75592;O75592-2	J3KPZ3;O75592;O75592-2	Probable E3 ubiquitin-protein ligase MYCBP2	MYCBP2	3	0.325669	0.280447	1.16125	0.861143	0.0125627	0.87398	0.00324506
76046000	78838000	66358000	50611000	79379000	65578000	94714000	102840000	106140000	106900000	87097000	67709000	123840000	105160000	118220000	109650000	152100000	122210000	13	P41252;J3KR24;Q5TCC4;Q5TCD2;Q5TCC5;Q5TCD1;Q5TCC6	P41252;J3KR24	Isoleucine--tRNA ligase, cytoplasmic	IARS	7	1.35649	1.75423	0.773271	1.29321	0.00870315	0.0126263	7.19331e-05
14940000	18918000	120810000	9261400	118870000	141270000	407480000000	392490000000	475180000000	490750000000	737410000000	752600000000	404910000000	466040000000	583970000000	567340000000	477860000000	483990000000	37	J3KR44;Q96FW1;F5GYN4;F5H6Q1;F5GYJ8;Q96FW1-2;F5H3F0;REV__F8VQF2	J3KR44;Q96FW1;F5GYN4;F5H6Q1;F5GYJ8;Q96FW1-2	Ubiquitin thioesterase OTUB1	OTUB1	8	7677.78	7036.84	1.09108	0.916521	9.08048e-06	0.539535	5.48958e-09
1	7620600	3232500	3152900	15629000	18158000	15503000	16163000	1	15746000	1	1	40615000	35602000	18587000	16701000	17509000	20619000	5	O00299;Q9NZA1;Q9NZA1-2;Q9NZA1-3;O15247;A6PVS0	O00299	Chloride intracellular channel protein 1	CLIC1	6	0.992028	3.13086	0.316855	3.15602	0.989356	0.0115903	0.00857472
445100000	465630000	544250000	520160000	466680000	514570000	432180000	414890000	384320000	401370000	393260000	486160000	431030000	426320000	421920000	484930000	345500000	325850000	13	P18621-3;P18621;J3KRX5;J3QQT2;J3QLC8;P18621-2;J3QS96;J3KRB3;J3KSJ0	P18621-3;P18621;J3KRX5;J3QQT2;J3QLC8;P18621-2;J3QS96;J3KRB3	60S ribosomal protein L17	RPL17	9	0.849746	0.823826	1.03146	0.969497	0.00706993	0.664355	0.0134178
1	14338000	5440100	4654900	31734000	32561000	18908000	17901000	13887000	13294000	1	1	1	33289000	19367000	20266000	20096000	22977000	2	Q9UK76-2;Q9UK76;J3KT51;F5GY98;Q9UK76-3;J3KSH8	Q9UK76-2;Q9UK76;J3KT51;F5GY98;Q9UK76-3;J3KSH8	Hematological and neurological expressed 1 protein	HN1	6	0.721193	1.30731	0.551662	1.81271	0.556394	0.154199	0.5471
216560000	268650000	287800000	282500000	197380000	227960000	255370000	226740000	219850000	228640000	309920000	289530000	212860000	210800000	223240000	233300000	224790000	248760000	20	J3KTA4;P17844;B4DLW8;J3QSF1;J3QRQ7;J3KRZ1;J3KRX8;J3QR02;J3QRN5	J3KTA4;P17844;B4DLW8	Probable ATP-dependent RNA helicase DDX5	DDX5	9	1.03322	0.914171	1.13023	0.884775	0.712988	0.100679	0.227099
456620000	408230000	367570000	373280000	409900000	366350000	622670000	606410000	638460000	645070000	582780000	723240000	546700000	409270000	604940000	529880000	536900000	514800000	10	P84098;J3KTE4;J3QR09;J3QL15	P84098;J3KTE4;J3QR09;J3QL15	60S ribosomal protein L19	RPL19	4	1.60315	1.31929	1.21516	0.822936	1.85887e-06	0.00627731	0.00169886
188190000	203020000	151530000	175590000	101020000	107950000	92926000	97713000	83172000	122030000	127850000	122550000	70452000	61235000	86940000	81078000	90430000	110300000	8	J3KTL2;Q07955;Q07955-2;Q07955-3;J3KSR8;J3KSW7;J3QQV5	J3KTL2;Q07955;Q07955-2;Q07955-3;J3KSR8	Serine/arginine-rich splicing factor 1	SRSF1	7	0.696906	0.539669	1.29136	0.774378	0.0326605	0.0404738	0.00338772
201600000	217630000	248150000	256140000	228950000	184920000	126930000	101410000	135300000	114550000	143900000	139860000	80231000	64914000	77120000	91070000	90453000	132620000	17	J3QK89;Q8IWX8	J3QK89;Q8IWX8	Calcium homeostasis endoplasmic reticulum protein	CHERP	2	0.569729	0.401086	1.42047	0.703994	2.30257e-05	0.0088566	3.62502e-06
10143000	18520000	22320000	20410000	21957000	14528000	10775000	8575500	7084300	10240000	1	1	1	13552000	12383000	11816000	8982400	1	3	Q9Y3D9;J3QLR8	Q9Y3D9;J3QLR8	28S ribosomal protein S23, mitochondrial	MRPS23	2	0.339966	0.433206	0.784766	1.27426	0.00170872	0.615494	0.0097667
17618000	24851000	34277000	25663000	12061000	12378000	26062000	52066000	36214000	27493000	4448500	5017700	36612000	57361000	37927000	55160000	36825000	56028000	2	J3QLS3;Q9Y2R9;J3QKW2;J3QQS1;J3KSI8	J3QLS3;Q9Y2R9;J3QKW2;J3QQS1;J3KSI8	28S ribosomal protein S7, mitochondrial	MRPS7	5	1.19278	2.20668	0.540529	1.85004	0.633903	0.0323682	0.000995921
682350000	723880000	631770000	855960000	546340000	526370000	423060000	357500000	334880000	343040000	532320000	472590000	352040000	443050000	411830000	449260000	296570000	376730000	8	J3QQ67;Q07020;H0YHA7;G3V203;F8VWC5;F8VYV2;F8VUA6;F8VXR6	J3QQ67;Q07020;H0YHA7;G3V203;F8VWC5;F8VYV2;F8VUA6	60S ribosomal protein L18	RPL18	8	0.621022	0.587263	1.05748	0.94564	0.0018127	0.593143	0.000590608
3745600	3037100	7706600	6765600	3039300	2937300	1904800	2008100	1735300	1632800	2150300	1808600	1264100	1388100	1735200	1557100	1777800	1825200	2	J3QR07;Q96MU7;Q96MU7-2	J3QR07;Q96MU7;Q96MU7-2	YTH domain-containing protein 1	YTHDC1	3	0.412754	0.350605	1.17726	0.849429	0.0121951	0.0414862	0.00712512
1580500000	1549200000	762090000	758170000	3017100000	2870100000	3238200000	2986600000	2444500000	2525500000	1235100000	1416200000	6120200000	6487100000	3596000000	3399300000	4169200000	4233300000	50	P08238;Q58FF7;Q5T9W8;Q92538;F8W026;REV__H3BMH3	P08238;Q58FF7	Heat shock protein HSP 90-beta;Putative heat shock protein HSP 90-beta-3	HSP90AB1;HSP90AB3P	6	1.31403	2.65775	0.494414	2.0226	0.317062	0.0038554	0.0014677
42451000	37904000	24086000	33674000	30996000	24155000	36204000	33347000	27203000	25575000	17182000	20294000	65992000	68725000	37519000	35949000	29878000	30975000	3	J3QRS3;O14950;P19105;P24844;J3KTJ1	J3QRS3;O14950;P19105	Myosin regulatory light chain 12B;Myosin regulatory light chain 12A	MYL12B;MYL12A	5	0.826866	1.39206	0.593987	1.68354	0.217811	0.0421754	0.137773
18739000	73008000	14125000	30728000	53558000	41638000	67215000	65356000	62076000	73936000	91702000	70671000	97713000	68778000	67002000	68569000	64548000	57992000	8	O43684;O43684-2;J3QT28;B4DDM6;J3QSX4	O43684;O43684-2;J3QT28;B4DDM6	Mitotic checkpoint protein BUB3	BUB3	5	1.8592	1.83179	1.01496	0.985256	0.00798483	0.884307	0.0131574
1	1	1	1	1	1	1	1	1	1	1	1	1	1	1	1	1	1	2	Q13620;K4DI93;Q13620-1;Q13620-3;A6NE76	Q13620;K4DI93;Q13620-1;Q13620-3;A6NE76	Cullin-4B	CUL4B	5	1	1	1	1	#DIV/0!	#DIV/0!	#DIV/0!
13168000	19168000	35500000	18078000	22940000	22303000	19715000	1	16394000	1	44957000	42827000	12880000	22341000	14030000	12228000	13784000	1	2	O95983;O95983-2;K7EIE8	O95983;O95983-2;K7EIE8	Methyl-CpG-binding domain protein 3	MBD3	3	0.944616	0.573839	1.64613	0.607484	0.891333	0.367449	0.0531501
15569000	17325000	24979000	16203000	20860000	18376000	1	1	1	1	1	1	1	1	1	1	1	1	2	Q8IYT4;Q8IYT4-2;K7EIJ8;K7EM02	Q8IYT4;Q8IYT4-2;K7EIJ8;K7EM02	Katanin p60 ATPase-containing subunit A-like 2	KATNAL2	4	5.29511e-08	5.29511e-08	1	1	1.23411e-07	#DIV/0!	1.23411e-07
117580000	121260000	115140000	124010000	75213000	73072000	80803000	82226000	67439000	70042000	84511000	76926000	85131000	83848000	66211000	68159000	82020000	78207000	12	Q15029;K7EJ81;Q15029-2;K7EP67;K7EJ74	Q15029;K7EJ81;Q15029-2	116 kDa U5 small nuclear ribonucleoprotein component	EFTUD2	5	0.73761	0.740212	0.996486	1.00353	0.0213555	0.95164	0.0240285
5389100	6079000	8493500	13151000	7766600	7962500	1	1747000	1488300	1529500	1	1	3109200	1	1520900	1696900	1816700	1527600	3	P48556;R4GMR5;K7EJR3;K7EJC1;K7ENY6;K7ERW6	P48556;R4GMR5;K7EJR3;K7EJC1	26S proteasome non-ATPase regulatory subunit 8	PSMD8	6	0.097556	0.198013	0.492674	2.02974	9.13574e-05	0.160434	0.000258413
5734600000	5621100000	1805600000	1514500000	164060000	163340000	1548700000	1443300000	884180000	955540000	1947800000	2242500000	141310000	175920000	188110000	216160000	748120000	896960000	10	P06899;P23527;P33778;Q16778;Q6DN03;Q6DRA6	P06899;P23527;P33778;Q16778	Histone H2B type 1-J;Histone H2B type 1-O;Histone H2B type 1-B;Histone H2B type 2-E	HIST1H2BJ;HIST1H2BO;HIST1H2BB;HIST2H2BE	6	0.60134	0.157738	3.81226	0.262312	0.371181	0.00156266	0.0729108
4065900	4212900	1	1	6263000	5746000	6262800	7417300	6405700	6924800	1	5759400	12885000	9415800	8592900	7738600	9077500	8266600	4	Q99426;Q6FGY5;K7EK42;K7EP07;K7EL99	Q99426;Q6FGY5;K7EK42;K7EP07	Tubulin-folding cofactor B	TBCB;CKAP1	5	1.61526	2.75912	0.585425	1.70816	0.218587	0.0165548	0.00133626
1	1	1	1	125160000	109780000	82568000	86147000	92449000	116310000	1	125110000	62649000	1	95066000	1	88768000	62925000	1	Q9UFH2;K7EK91;Q9UFH2-2	Q9UFH2;K7EK91;Q9UFH2-2	Dynein heavy chain 17, axonemal	DNAH17	3	2.1392	1.31697	1.62434	0.615634	0.177637	0.22639	0.689774
34070000	50998000	34939000	31552000	21168000	23500000	28405000	23210000	27157000	27404000	23124000	29490000	19911000	18710000	20273000	19419000	22922000	19792000	3	Q15428;K7EKV8;K7EMT0;K7EP23	Q15428;K7EKV8;K7EMT0;K7EP23	Splicing factor 3A subunit 2	SF3A2	4	0.809216	0.61677	1.31202	0.762183	0.192037	0.000496222	0.0165983
3483800	3031900	4097200	4614200	4589900	3928200	6534800	1	6325400	1	5841400	3995600	5616700	12826000	1	11996000	5956100	5349200	2	K7ELG9;Q3MHD2-2;Q3MHD2	K7ELG9;Q3MHD2-2;Q3MHD2	Protein LSM12 homolog	LSM12	3	0.955865	1.758	0.543724	1.83917	0.893868	0.2	0.157383
91571000	90179000	28581000	24718000	238720000	270640000	257130000	245030000	183970000	198360000	105610000	129520000	652280000	590390000	304760000	302760000	338660000	352590000	25	P22314;Q5JRS0;Q5JRR9;Q5JRS2;Q5JRS3;Q5JRS1	P22314	Ubiquitin-like modifier-activating enzyme 1	UBA1	6	1.50404	3.41404	0.440546	2.26991	0.23709	0.0059634	0.00296034
47474000	41793000	42892000	43188000	47042000	44764000	26796000	25542000	25577000	24672000	1	27550000	27960000	32064000	35484000	31470000	39983000	32004000	4	Q9BYD3;K7ES61;Q9BYD3-2;K7ELQ0;K7ELF1;K7EKI4;K7EJ73	Q9BYD3;K7ES61;Q9BYD3-2;K7ELQ0;K7ELF1;K7EKI4	39S ribosomal protein L4, mitochondrial	MRPL4	7	0.487125	0.74476	0.65407	1.52889	0.000450474	0.0338664	0.000151521
49120000	40786000	27547000	23118000	106950000	104440000	100670000	111290000	85632000	70448000	37795000	31088000	198780000	184810000	103870000	109150000	121370000	154450000	10	Q99497;K7ELW0;K7EN27	Q99497;K7ELW0;K7EN27	Protein DJ-1	PARK7	3	1.2414	2.47877	0.500812	1.99676	0.503042	0.00652133	0.00317304
34546000	36002000	19628000	25488000	32643000	32551000	34057000	29166000	39542000	31753000	27863000	22279000	71125000	75031000	44105000	53151000	49347000	49234000	2	K7EM18;P41567;O60739	K7EM18;P41567;O60739	Eukaryotic translation initiation factor 1;Eukaryotic translation initiation factor 1b	EIF1;EIF1B	3	1.02102	1.89095	0.539953	1.85201	0.860385	0.00105845	0.000980318
123930000	110810000	165820000	181240000	129450000	140230000	130920000	138780000	128730000	129170000	130940000	121200000	141970000	128010000	135920000	115120000	122090000	107180000	7	P35268;K7ERI7;K7EMH1;K7ELC4;K7EKS7;K7EP65;K7EJT5;H0Y8C2;Q6P5R6;C9JYQ9	P35268;K7ERI7;K7EMH1;K7ELC4;K7EKS7;K7EP65	60S ribosomal protein L22	RPL22	10	0.915747	0.88116	1.03925	0.962231	0.308513	0.414786	0.194258
9243900	8442000	1	7995000	7622600	24997000	36123000	23669000	25436000	33827000	30339000	34731000	45526000	44160000	32512000	38765000	38336000	31887000	2	Q13526;K7EN45;K7EMU7	Q13526;K7EN45;K7EMU7	Peptidyl-prolyl cis-trans isomerase NIMA-interacting 1	PIN1	3	3.15821	3.96542	0.796437	1.25559	0.000347922	0.0311033	3.41206e-05
18305000	14042000	18520000	19208000	12704000	12697000	1	1	1	1	1	1	1	1	1	1	1	1	2	Q96BD8;Q96BD8-2;K7EP61;K7EPW0	Q96BD8;Q96BD8-2;K7EP61;K7EPW0	Spindle and kinetochore-associated protein 1	SKA1	4	6.2843e-08	6.2843e-08	1	1	1.78425e-07	#DIV/0!	1.78425e-07
231040000	230840000	302010000	291480000	113380000	113920000	134220000	119100000	150270000	184330000	192620000	176900000	91025000	135420000	108500000	110870000	73504000	58975000	9	Q9UBQ5;K7ERF1;B7ZAM9;K7EMQ9;K7ES31;K7EQM4;K7EK53	Q9UBQ5;K7ERF1;B7ZAM9;K7EMQ9;K7ES31	Eukaryotic translation initiation factor 3 subunit K	EIF3K	7	0.746443	0.450852	1.65563	0.604	0.162844	0.00336771	0.00820792
98927000	99414000	88563000	86497000	59067000	67425000	51322000	60065000	78287000	60595000	97939000	98331000	36964000	32732000	42562000	42716000	52790000	48058000	8	P22087;M0R2Q4;M0QXL5;M0R299;M0R0P1;M0R2B0;M0R1H0;M0R2U2;R4GMW7;A6NHQ2	P22087;M0R2Q4;M0QXL5;M0R299;M0R0P1;M0R2B0;M0R1H0;M0R2U2	rRNA 2-O-methyltransferase fibrillarin	FBL	10	0.893269	0.511754	1.74551	0.5729	0.426436	0.00481405	0.000263482
14755000	25311000	33697000	25361000	22787000	22738000	10992000	19034000	42696000	36075000	36335000	54086000	27870000	10295000	27452000	32404000	31746000	25357000	4	O43615;M0QXU7;M0R301;M0R124	O43615;M0QXU7;M0R301;M0R124	Mitochondrial import inner membrane translocase subunit TIM44	TIMM44	4	1.37725	1.07242	1.28425	0.778665	0.21629	0.332893	0.681715
1	1	1	1	1	1	1	1	1	1	7666300	2439800	9719200	1	4314000	1	1	1	2	P38117-2;P38117;M0QY67	P38117-2;P38117;M0QY67	Electron transfer flavoprotein subunit beta	ETFB	3	1.68435e+06	2.33887e+06	0.720157	1.38859	0.211238	0.757819	0.183206
1	1	1	1	1	1	18666000	17173000	23155000	23201000	95304000	28823000	14739000	1	1	1	1	1	1	O60885;O60885-3;Q15059;O60885-2;M0QZD9;Q15059-2	O60885;O60885-3;Q15059;O60885-2;M0QZD9;Q15059-2	Bromodomain-containing protein 4;Bromodomain-containing protein 3	BRD4;BRD3	6	34387000	2.4565e+06	13.9984	0.0714369	0.0189129	0.0290491	0.340893
1336000000	1379800000	1547600000	1566000000	1480000000	1511400000	879070000	886220000	1000500000	951110000	879060000	1009300000	520910000	620280000	806290000	839320000	711750000	678650000	16	P46782;M0R0F0;M0R0R2;M0QZN2	P46782;M0R0F0;M0R0R2;M0QZN2	40S ribosomal protein S5;40S ribosomal protein S5, N-terminally processed	RPS5	4	0.635459	0.473562	1.34187	0.745229	3.41214e-07	0.00136473	1.81358e-07
334630000	250950000	288970000	273280000	282610000	320760000	268710000	270910000	246950000	252880000	267650000	284290000	157980000	273130000	282960000	295400000	264870000	301420000	11	Q02543;M0R117;M0R1A7;M0R3D6;M0R0P7	Q02543;M0R117;M0R1A7;M0R3D6;M0R0P7	60S ribosomal protein L18a	RPL18A	5	0.908743	0.899817	1.00992	0.990178	0.0816006	0.90944	0.270313
11000000	10627000	6528700	9759200	9043800	9504600	27269000	29328000	26795000	36375000	43396000	58565000	41911000	40758000	54076000	50716000	45506000	47277000	3	Q9Y314;M0R3B2;M0R1K2;M0QX85	Q9Y314;M0R3B2;M0R1K2	Nitric oxide synthase-interacting protein	NOSIP	4	3.92694	4.96329	0.791196	1.26391	0.000295657	0.104406	9.99995e-09
3674400	4643500	5230200	21989000	8433900	10138000	11268000	9443600	2153800	1	1	28251000	22779000	15949000	16839000	3522400	10787000	42762000	1	Q9NZ01;Q9NZ01-2;M0R3C3	Q9NZ01;Q9NZ01-2;M0R3C3	Trans-2,3-enoyl-CoA reductase	TECR	3	0.944693	2.08169	0.45381	2.20357	0.925669	0.175421	0.143279
241110000	266880000	303570000	285060000	301620000	240690000	207760000	209720000	222510000	194270000	188590000	226040000	249410000	248400000	231400000	194330000	219160000	237640000	18	O00231-2;O00231;J3QRY4;J3QS13;J3KSW3	O00231-2;O00231	26S proteasome non-ATPase regulatory subunit 11	PSMD11	5	0.762015	0.84222	0.90477	1.10525	0.000549281	0.062227	0.013185
55154000	52890000	41788000	54613000	51885000	48785000	34118000	30744000	38041000	35423000	37966000	41253000	37540000	28254000	35750000	28784000	36692000	33157000	8	O00232;O00232-2	O00232;O00232-2	26S proteasome non-ATPase regulatory subunit 12	PSMD12	2	0.712993	0.656071	1.08676	0.920164	0.00017681	0.221792	5.49849e-05
7006300	7968600	4331700	12898000	16483000	15144000	19062000	14996000	24765000	25869000	25178000	25582000	107350000	58211000	18237000	24834000	23738000	21125000	4	O00264;B7Z1L3;O15173-2;O15173	O00264;B7Z1L3	Membrane-associated progesterone receptor component 1	PGRMC1	4	2.12202	3.97131	0.534338	1.87147	0.00133741	0.203199	0.0538274
109650000	123850000	125950000	123990000	114490000	109170000	80994000	80242000	96107000	95333000	95111000	94506000	24896000	41875000	67832000	60849000	57152000	41881000	12	O00268;Q5TBP5	O00268;Q5TBP5	Transcription initiation factor TFIID subunit 4	TAF4	2	0.766925	0.416469	1.8415	0.543037	9.59569e-05	0.000177621	2.29178e-06
107600000	102310000	22423000	25813000	235580000	231270000	196950000	246390000	174740000	170690000	54227000	23584000	557290000	515700000	269130000	251760000	327420000	324670000	20	P31948;G3XAD8;F5H0T1;F5H783;F5GXD8;H0YGI8	P31948;G3XAD8;F5H0T1	Stress-induced-phosphoprotein 1	STIP1	6	1.19529	3.09791	0.385838	2.59176	0.66155	0.00477413	0.00311628
74253000	31478000	28969000	40802000	25885000	16944000	13856000	17690000	11944000	14019000	11605000	19750000	9907700	7240700	13261000	12154000	11458000	11179000	5	O00422;H7BZW6;U3KPY7;U3KQ12	O00422;H7BZW6	Histone deacetylase complex subunit SAP18	SAP18	4	0.407015	0.298631	1.36294	0.73371	0.0266979	0.0314127	0.0113868
9795500	10904000	14578000	20062000	2430900	6888700	4596400	4383100	3333000	2532100	5860500	2624900	4057600	4697100	1	2623200	4177600	7405900	4	O00425	O00425	Insulin-like growth factor 2 mRNA-binding protein 3	IGF2BP3	1	0.360815	0.355115	1.01605	0.984201	0.0221913	0.957665	0.0270211
12449000	10158000	1	15392000	15969000	1	25997000	22069000	25220000	29903000	29122000	32847000	33426000	37581000	26743000	27051000	36175000	57946000	2	O00483	O00483	NADH dehydrogenase [ubiquinone] 1 alpha subcomplex subunit 4	NDUFA4	1	3.06029	4.05651	0.754415	1.32553	0.000255967	0.0991548	0.000565765
145560000	108310000	117450000	113100000	114910000	102860000	96344000	87753000	87625000	94014000	113880000	70376000	83382000	60557000	94780000	81020000	90712000	84948000	8	O00487	O00487	26S proteasome non-ATPase regulatory subunit 14	PSMD14	1	0.783252	0.705506	1.1102	0.900739	0.0128978	0.256458	0.0012832
5500400	4059800	3235500	3883100	3978900	4194400	4125500	4619000	4605400	4584400	4113000	4332700	5118100	4854300	4724800	5160900	4659400	4557800	1	O00505	O00505	Importin subunit alpha-3	KPNA3	1	1.06148	1.16993	0.907299	1.10217	0.443518	0.00953423	0.0526041
881270000	809890000	1001600000	1008000000	669160000	697270000	654040000	712990000	702390000	694230000	848700000	838270000	519400000	480620000	676570000	657980000	666190000	611230000	29	O00571;O00571-2;O15523;B4DXX7;B4E3C4;B4DLA0;C9J081;C9J8G5;Q9NQI0;Q9NQI0-4;Q9NQI0-2;Q9NQI0-3;D6RCM4;H0Y960	O00571;O00571-2;O15523;B4DXX7	ATP-dependent RNA helicase DDX3X;ATP-dependent RNA helicase DDX3Y	DDX3X;DDX3Y	14	0.878321	0.712819	1.23218	0.81157	0.162692	0.014639	0.00535915
2015400	2566700	1503000	1586900	2151600	2249200	2654800	2536800	1919100	2144700	2330600	1534000	2215000	3203300	3090300	2812300	3228500	3370200	1	O00629	O00629	Importin subunit alpha-4	KPNA4	1	1.08674	1.4843	0.732159	1.36582	0.478386	0.00786367	0.00221876
1	711890	1	1	1135300	1255600	1640600	1309200	1562800	1599000	1	1792100	1592300	1457800	1708100	1718700	1927900	1729200	1	O14545	O14545	TRAF-type zinc finger domain-containing protein 1	TRAFD1	1	2.54729	3.26609	0.779919	1.28218	0.0525433	0.211635	0.000883054
32926000	22305000	50948000	36228000	27916000	37980000	18140000	12207000	17214000	16474000	21023000	19205000	12773000	9731900	19028000	16434000	15086000	14280000	7	O14646;O14646-2;O14647;O14647-2;B7Z3I4;O14647-3	O14646;O14646-2	Chromodomain-helicase-DNA-binding protein 1	CHD1	6	0.500535	0.419259	1.19386	0.837621	0.00199171	0.144132	0.000728276
74738000	67964000	71890000	52146000	49902000	50769000	110970000	107600000	119210000	122040000	144840000	143350000	94593000	93317000	126990000	129850000	105880000	120360000	16	O14654	O14654	Insulin receptor substrate 4	IRS4	1	2.03591	1.82628	1.11479	0.897033	1.31171e-05	0.195935	9.4693e-05
23277000	26986000	15683000	11811000	75936000	85042000	78451000	82676000	60379000	40656000	13855000	13531000	265340000	180690000	77599000	82118000	90996000	82031000	6	O14737;K7EQA1;K7ESJ4;Q3HM38	O14737;K7EQA1;K7ESJ4	Programmed cell death protein 5	PDCD5	4	1.21284	3.26209	0.3718	2.68962	0.650173	0.0368974	0.0247841
55953000000	59248000000	74628000000	72212000000	57407000000	59026000000	22808000000	22859000000	28597000000	30816000000	39440000000	39104000000	13029000000	12777000000	20145000000	20700000000	19239000000	19767000000	57	O14744;O14744-2;A8MTP3;G3V580;H0YJX6;G3V5L5;G3V2X6;C9JSX3;G3V2L6	O14744;O14744-2;A8MTP3	Protein arginine N-methyltransferase 5;Protein arginine N-methyltransferase 5, N-terminally processed	PRMT5	9	0.485169	0.279166	1.73793	0.575399	2.83914e-05	0.00324261	2.02435e-07
1	1	1	1	1	1	1	1	1	1	1	1	24776000	1	1	1	1	1	3	O14818;O14818-2;Q8TAA3;Q8TAA3-5;Q8TAA3-2;H0Y586;O14818-4	O14818;O14818-2	Proteasome subunit alpha type-7	PSMA7	7	1	4.12933e+06	2.4217e-07	4.12933e+06	#DIV/0!	0.340893	0.340893
27565000	36814000	35050000	31075000	21331000	23203000	1	1	1	1	1	1	1	1	1	1	1	29679000	3	O14979;O14979-2;O14979-3	O14979;O14979-2;O14979-3	Heterogeneous nuclear ribonucleoprotein D-like	HNRPDL	3	3.42783e-08	0.169557	2.02163e-07	4.9465e+06	4.70346e-07	0.340893	0.00144244
1	1	1	1	11069000	9695700	6676800	7133900	1	6020200	3857700	1	14190000	9074500	1	1	10922000	6270400	3	O14980;C9JKM9;C9J673;C9JV99;C9JQ02;C9IZS4;H7BZC5	O14980	Exportin-1	XPO1	7	1.14081	1.94835	0.585527	1.70786	0.853253	0.329071	0.33441
204610000	198520000	264010000	263220000	177710000	181340000	132350000	185390000	170750000	201230000	201090000	216090000	101700000	71781000	140920000	136770000	175540000	115610000	19	O15042;O15042-2;E7ET15;O15042-3;C9JB80;H0Y8D9;E7EW00;H7C4V2;C9J5L1;C9JDJ7;U3KPT1	O15042;O15042-2;E7ET15;O15042-3;C9JB80	U2 snRNP-associated SURP motif-containing protein	U2SURP	11	0.858455	0.575706	1.49113	0.670631	0.160703	0.00960016	0.00178182
3732800	3833400	2057900	1801100	6269300	6019000	11150000	10577000	10240000	7809900	5258800	5026100	16219000	15953000	11940000	9332800	12835000	15249000	3	O15067;F5GWT9;H0YGH1	O15067;F5GWT9	Phosphoribosylformylglycinamidine synthase	PFAS	3	2.11111	3.43808	0.614038	1.62856	0.00890254	0.00748028	3.128e-05
21582000	38159000	60365000	31316000	26990000	23781000	1	1	14085000	11748000	1	10026000	1	1	11131000	1	1	1	3	O15143;C9J6C8;C9JFG9;C9JQM8;C9JEY1;C9J4Z7;C9K057;C9JBJ7	O15143	Actin-related protein 2/3 complex subunit 1B	ARPC1B	8	0.17735	0.0550514	3.22154	0.31041	0.00157214	0.239587	0.000408135
201850000	182860000	209460000	263930000	48905000	65526000	19435000	12848000	17110000	16546000	15459000	16443000	22142000	13557000	15412000	14753000	15042000	13798000	8	O15144;H7C3F9;G5E9J0;C9JTV5;G5E9S7	O15144	Actin-related protein 2/3 complex subunit 2	ARPC2	5	0.100605	0.0973789	1.03312	0.967938	0.00193901	0.746528	0.00189828
102660000	66447000	90204000	91719000	50551000	59745000	51559000	37984000	40626000	39034000	39210000	35353000	47894000	29096000	27137000	34241000	34188000	34059000	6	O15145;C9JZD1;F8VR50	O15145;C9JZD1	Actin-related protein 2/3 complex subunit 3	ARPC3	3	0.528403	0.447872	1.17981	0.847596	0.00205699	0.12977	0.000809698
4872200	9812000	12898000	3608800	1505300	3131100	2589600	1720000	3175900	1	3220400	2777000	2534300	1798500	2462200	1837600	2292400	1	3	O15226-2;O15226	O15226-2;O15226	NF-kappa-B-repressing factor	NKRF	2	0.376329	0.304934	1.23413	0.810286	0.074624	0.515451	0.0480999
407670000	395000000	508530000	502350000	307580000	307620000	174740000	196060000	196300000	197030000	210850000	239270000	112800000	101630000	167660000	134170000	176030000	161310000	26	O15294;O15294-3;O15294-2;O15294-4;C9JZL3;H7C2T7	O15294;O15294-3;O15294-2;O15294-4	UDP-N-acetylglucosamine--peptide N-acetylglucosaminyltransferase 110 kDa subunit	OGT	6	0.499949	0.351457	1.4225	0.702985	0.000285974	0.00284186	4.43507e-05
11318000	11723000	9569800	9228300	19870000	13178000	19895000	22236000	18782000	16499000	11253000	13774000	46267000	32216000	21265000	20884000	22651000	16555000	4	O15355	O15355	Protein phosphatase 1G	PPM1G	1	1.36791	2.13439	0.640893	1.56032	0.073809	0.0719979	0.0135392
1725700000	1741300000	2059500000	2067100000	1472600000	1417800000	935370000	823320000	897030000	825170000	986380000	989020000	561510000	527120000	749180000	733660000	647770000	696930000	22	O15371;B4DVY1;B0QYA5;B0QYA6;B0QYA3;B0QYA7;B0QYA4;B0QYA8	O15371;B4DVY1	Eukaryotic translation initiation factor 3 subunit D	EIF3D	8	0.52044	0.373538	1.39327	0.717735	3.09918e-05	0.000332023	3.44898e-06
109160000	104560000	113650000	99814000	68428000	68481000	62866000	94393000	62447000	129100000	57510000	87200000	50042000	66134000	75120000	82034000	65982000	75588000	10	O15397;O15397-2;H0YH64;F5H2I3;F5H244;F5GXT5;F5H292	O15397;O15397-2	Importin-8	IPO8	7	0.874884	0.735517	1.18948	0.840702	0.417863	0.303341	0.0254184
1	1	1	1	1	1	1	1	1	1	1	1	1	1014800	1	1	1	1	1	O15498	O15498	Synaptobrevin homolog YKT6	YKT6	1	1	169134	5.91247e-06	169134	#DIV/0!	0.340893	0.340893
238960000	251770000	364960000	324890000	129560000	147360000	181030000	160430000	181370000	181340000	205220000	229570000	150720000	149140000	148700000	147580000	160680000	141160000	20	O43143;Q14562;F5H658;O60231	O43143	Putative pre-mRNA-splicing factor ATP-dependent RNA helicase DHX15	DHX15	4	0.781448	0.61611	1.26836	0.788421	0.207656	0.00273112	0.0349645
55312000	42865000	25527000	42124000	15951000	18139000	10511000	13521000	10173000	9681500	10991000	11255000	8391700	10049000	1	11235000	7855600	7179100	5	O43167;O43167-2	O43167	Zinc finger and BTB domain-containing protein 24	ZBTB24	2	0.330798	0.223644	1.47913	0.676073	0.00624174	0.0621661	0.00298258
16417000	17582000	22300000	14528000	28274000	16330000	17384000	18347000	9367300	8383200	7252700	18782000	18028000	13198000	7675300	20712000	9075500	6423900	3	O43172;O43172-2	O43172;O43172-2	U4/U6 small nuclear ribonucleoprotein Prp4	PRPF4	2	0.688863	0.650715	1.05863	0.944621	0.0788756	0.826408	0.0605089
19095000	22599000	11987000	8181500	23821000	25816000	65180000	61111000	61605000	56561000	51137000	53406000	116910000	177690000	110920000	81668000	70801000	73264000	4	P35613;P35613-2;P35613-4;P35613-3;I3L192;R4GMX5;R4GN83	P35613;P35613-2;P35613-4;P35613-3;I3L192;R4GMX5;R4GN83	Basigin	BSG	7	3.13006	5.66149	0.552869	1.80875	6.88958e-07	0.0180432	0.000420431
163890000	167430000	190550000	141350000	151260000	155450000	172590000	174300000	175440000	171700000	197310000	176370000	189960000	123400000	176400000	175980000	186540000	191250000	20	O43242;B4DT72;H0YGV8	O43242;B4DT72	26S proteasome non-ATPase regulatory subunit 3	PSMD3	3	1.10081	1.07588	1.02317	0.977353	0.0675668	0.725805	0.350757
14404000	11041000	10579000	13797000	7309800	6496500	6284800	10818000	6891900	7846200	10340000	8279900	4124400	3640300	5740500	7376100	5544500	7355200	2	O43290	O43290	U4/U6.U5 tri-snRNP-associated protein 1	SART1	1	0.793068	0.53092	1.49376	0.66945	0.179176	0.0178536	0.00695447
32748000	27330000	37395000	31067000	23478000	22306000	22561000	27019000	20638000	25133000	27329000	24090000	1	17052000	21871000	20667000	1	1	11	P52756;P52756-5;P52756-2;P52756-4;C9JFQ5;C9J9P7	P52756	RNA-binding protein 5	RBM5	6	0.841938	0.341835	2.463	0.406009	0.106012	0.0103192	0.00365348
27951000	36949000	31200000	28192000	14061000	22466000	32020000	15828000	17963000	16450000	13357000	15354000	13791000	11227000	14377000	12530000	14515000	14872000	9	O43390-2;O43390;S4R3J4;O43390-3;B4DT28;E7ETM7	O43390-2;O43390;S4R3J4;O43390-3;B4DT28;E7ETM7	Heterogeneous nuclear ribonucleoprotein R	HNRNPR;HNRPR	6	0.690043	0.505612	1.36477	0.732725	0.0780726	0.111497	0.00221655
3441900	2407600	5835700	4514300	6919700	4239900	98652000	150660000	150970000	171180000	245310000	204650000	84956000	87938000	120100000	152020000	146990000	150910000	9	P36969;P36969-2;K7EJ20;K7ERP4;K7EKX7;K7ENB4;R4GNE4	P36969;P36969-2;K7EJ20;K7ERP4;K7EKX7;K7ENB4;R4GNE4	Phospholipid hydroperoxide glutathione peroxidase, mitochondrial	GPX4	7	37.3339	27.1542	1.37489	0.727333	1.11715e-05	0.0841372	2.96056e-06
5572800	6722200	6052600	11079000	25081000	28230000	5949800	12567000	1	10445000	1	1	13231000	18602000	5810000	13373000	8548800	8625900	3	O43707;O43707-2;P12814-4;P12814-3;P12814;P12814-2;H9KV75;F5GXS2;O43707-3;H7C144;H7C5W8;H0YJW3;G3V2W4;H0YJ11;K7EJH8	O43707;O43707-2;P12814-4;P12814-3;P12814;P12814-2;H9KV75	Alpha-actinin-4;Alpha-actinin-1	ACTN4;ACTN1	15	0.350044	0.82418	0.424718	2.3545	0.0898267	0.0538614	0.607422
87891000	91451000	93432000	92444000	71188000	60595000	64620000	55966000	57954000	67840000	72094000	88734000	64308000	46749000	66245000	62078000	72611000	56050000	9	O43719;Q5H918;Q5H919	O43719	HIV Tat-specific factor 1	HTATSF1	3	0.81933	0.740524	1.10642	0.903816	0.070384	0.307389	0.00916353
1	1	1	1	6172700	6763100	1	5873500	11491000	11190000	1	1	18231000	17144000	9650700	1	8411100	8044800	2	O43765;K7EMD6	O43765;K7EMD6	Small glutamine-rich tetratricopeptide repeat-containing protein alpha	SGTA	2	2.2074	4.75282	0.46444	2.15313	0.350361	0.15448	0.0245472
40573000	19514000	33288000	13729000	15677000	2572800	26280000	24126000	37279000	38204000	49046000	28279000	58415000	79469000	59791000	22091000	30704000	19289000	4	O43809;H3BND3;H3BV41	O43809;H3BND3;H3BV41	Cleavage and polyadenylation specificity factor subunit 5	NUDT21	3	1.62112	2.15198	0.753317	1.32746	0.0868286	0.323493	0.0619005
4706600	5001200	1	3654500	8904100	7986700	20693000	19164000	19780000	32177000	19673000	18540000	20831000	23678000	21165000	20241000	22802000	20000000	4	O43837;O43837-2;O43837-3	O43837;O43837-2	Isocitrate dehydrogenase [NAD] subunit beta, mitochondrial	IDH3B	3	4.29797	4.25467	1.01018	0.989925	5.51548e-05	0.923068	4.62006e-07
15153000	19191000	11147000	11975000	32677000	29111000	26222000	38428000	23524000	26795000	17277000	1	65792000	66160000	27873000	29113000	38181000	38422000	6	P51572-2;P51572;C9J0M4;C9JQ75;C9JSP1;C9JMD7	P51572-2;P51572;C9J0M4;C9JQ75;C9JSP1	B-cell receptor-associated protein 31	BCAP31	6	1.10894	2.22668	0.498025	2.00793	0.742215	0.0303874	0.0123475
18487000	22112000	10275000	21788000	26593000	11774000	36467000	34844000	34311000	28776000	38409000	23393000	26232000	30237000	33369000	34534000	29934000	34144000	4	O60256;O60256-3;O60256-2;B4E329;E7EPA1;I3L0S1;C9K0K7;C9JJS3;C9JDU5;E7EW35;C9JUN4;I3L4G9;C9JDH0;I3L164;I3L331	O60256;O60256-3;O60256-2;B4E329;E7EPA1;I3L0S1;C9K0K7;C9JJS3	Phosphoribosyl pyrophosphate synthase-associated protein 2	PRPSAP2	15	1.76711	1.6973	1.04112	0.960499	0.00211778	0.633874	0.00125966
4026000	3916200	1	2050800	5324500	5317000	5024800	5276500	4368500	1	2375600	1	7977200	6750200	5243600	1	5079200	6189100	2	O60493;O60493-4;O60493-2;O60493-3	O60493;O60493-4;O60493-2;O60493-3	Sorting nexin-3	SNX3	4	0.826063	1.51394	0.54564	1.83271	0.655576	0.145968	0.23822
164800000	147660000	156140000	147640000	159510000	149730000	88167000	89443000	105030000	70539000	63243000	67014000	118690000	91871000	84225000	84904000	101810000	100940000	11	O60506;O60506-2;O60506-3;O60506-4;O60506-5;F6UXX1	O60506;O60506-2;O60506-3;O60506-4;O60506-5	Heterogeneous nuclear ribonucleoprotein Q	SYNCRIP	6	0.522362	0.629338	0.830019	1.20479	1.34219e-06	0.0807176	2.62894e-06
178500000	204150000	250830000	320850000	120990000	115610000	53190000	68700000	69054000	75043000	118620000	87183000	27184000	27287000	56124000	51846000	62120000	44766000	22	O60825;B0FLL2;O60825-2;B4DY91;B4DI16;P16118;B4DUN5	O60825;B0FLL2;O60825-2;B4DY91;B4DI16	6-phosphofructo-2-kinase/fructose-2,6-bisphosphatase 2;6-phosphofructo-2-kinase;Fructose-2,6-bisphosphatase	PFKFB2	7	0.396153	0.226148	1.75174	0.570862	0.00497399	0.0117826	0.000848318
32641000	36444000	50402000	45141000	40659000	32044000	12328000	22773000	19435000	18316000	25674000	30627000	26426000	29040000	27226000	28506000	36230000	25991000	7	O60841	O60841	Eukaryotic translation initiation factor 5B	EIF5B	1	0.544189	0.730705	0.744745	1.34274	0.00101016	0.0342898	0.00971367
6553800	7730300	2292100	3195800	12657000	13127000	13366000	14658000	11845000	14025000	11651000	11788000	29385000	27390000	13398000	14362000	22768000	21521000	2	O60869;O60869-2	O60869;O60869-2	Endothelial differentiation-related factor 1	EDF1	2	1.69754	2.82782	0.6003	1.66583	0.0213601	0.0104419	0.00168911
505960000	638780000	405290000	512250000	373990000	372360000	515610000	427540000	442680000	502020000	771250000	699910000	429530000	534340000	606590000	678540000	499060000	515810000	6	O60884;H3BMW5	O60884	DnaJ homolog subfamily A member 2	DNAJA2	2	1.19596	1.16209	1.02915	0.971676	0.231194	0.820417	0.201774
22113000	20388000	16390000	22801000	17052000	19717000	1	1	1	1	1	1	17329000	15411000	1	1	1	1	3	O75083;D6RD66;O75083-3	O75083;D6RD66	WD repeat-containing protein 1	WDR1	3	5.06496e-08	0.276378	1.83262e-07	5.45667e+06	4.39975e-09	0.145855	0.00274249
28293000	36880000	5295500	3376900	1	1	2656200	2037600	1	1	1	1	1	1	1	1	1	1	3	O75367;O75367-3;O75367-2;B4DJC3;D6RCF2;Q9P0M6;Q5SQT3	O75367;O75367-3;O75367-2;B4DJC3;D6RCF2	Core histone macro-H2A.1;Histone H2A	H2AFY	7	0.0635626	8.12508e-08	782301	1.27828e-06	0.110385	0.149601	0.0901144
1468000	1	1	1	3462600	2872100	1	1	1	1	1	1	15567000	6748500	1	1	1	6750500	3	O75396	O75396	Vesicle-trafficking protein SEC22b	SEC22B	1	7.68964e-07	3.72512	2.06427e-07	4.84433e+06	0.0691788	0.0849634	0.204902
1	1	1	1	1	1	1	1	1	1	1	1	3717800	1	1	1	1	1	1	O75475	O75475	PC4 and SFRS1-interacting protein	PSIP1	1	1	619634	1.61386e-06	619634	#DIV/0!	0.340893	0.340893
21841000	28840000	31514000	31226000	8975300	21348000	5214700	8440800	8874900	8125100	9018900	8854700	2779300	7339600	6535400	6317100	8413300	7367300	3	O75494;O75494-2;O75494-3;O75494-6;O75494-4;Q5JRI1;O75494-5;Q6IQ42;R4GMP8	O75494;O75494-2;O75494-3;O75494-6;O75494-4;Q5JRI1;O75494-5;Q6IQ42	Serine/arginine-rich splicing factor 10	SRSF10;FUSIP1	9	0.337607	0.26959	1.2523	0.798531	0.00121808	0.131014	0.000658893
3153100	2428900	2365600	1802300	3921200	1	3109600	1	1	1	1	1	4362700	9677300	3127500	3521700	3331600	2957800	1	O75531	O75531	Barrier-to-autointegration factor	BANF1	1	0.227458	1.9734	0.115262	8.67589	0.0413096	0.00695846	0.0913987
1007500000	1053900000	1212700000	1226300000	706360000	710760000	603880000	627480000	639780000	664140000	769960000	737120000	409890000	399650000	518200000	524360000	539100000	515000000	43	O75533;B4DGZ4;O75533-2;H7C341;F8WC19	O75533	Splicing factor 3B subunit 1	SF3B1	5	0.683117	0.491118	1.39094	0.718936	0.00981434	0.000446925	0.000446629
1	3062000	2339600	1	3779400	4395800	4461200	3930000	3392500	1	1	1	1	1	1	1	1	1	1	O75607	O75607	Nucleoplasmin-3	NPM3	1	0.867929	4.4193e-07	1.96395e+06	5.09178e-07	0.804455	0.0516498	0.0147095
231690000	253320000	372240000	317850000	258770000	257850000	141090000	128510000	158600000	134990000	137120000	137650000	167040000	165820000	147400000	193020000	170240000	176650000	30	O75643;C9JAQ9;O75643-2;B4E0P5;Q86VH2;Q86VH2-2;Q86VH2-3	O75643	U5 small nuclear ribonucleoprotein 200 kDa helicase	SNRNP200	7	0.49533	0.603037	0.821393	1.21744	6.98576e-05	0.00207144	0.000535164
816590000	812190000	1145600000	977970000	514690000	503410000	764610000	700510000	844170000	733630000	970520000	901770000	290100000	260600000	522850000	455250000	424300000	522820000	19	O75688;O75688-4;C9JIR6;B8ZZF0;O75688-5;O75688-3	O75688;O75688-4;C9JIR6;B8ZZF0;O75688-5	Protein phosphatase 1B	PPM1B	6	1.03035	0.519012	1.98521	0.503726	0.833591	7.3256e-05	0.00705929
17765000	23249000	25643000	26886000	13993000	12710000	11684000	1	1	1	1	1	1	1	1	1	1	1	18	O75688-2	O75688-2			1	0.0971675	4.98977e-08	1.94733e+06	5.13523e-07	0.000186979	0.340893	1.06556e-05
714910000	710680000	728150000	759990000	529880000	508890000	416120000	420350000	423080000	391230000	424790000	461110000	241150000	239040000	298350000	317160000	325020000	313450000	18	O75821;K7EL20;K7ENA8;K7ER90;K7EP16;K7EL60;K7ENH0	O75821;K7EL20;K7ENA8;K7ER90	Eukaryotic translation initiation factor 3 subunit G	EIF3G	7	0.641791	0.438753	1.46276	0.683638	0.000419227	2.61147e-05	1.48212e-05
228220000	200290000	223630000	211770000	133070000	126220000	256200000	186990000	278220000	135130000	136230000	114000000	132980000	66376000	162970000	211360000	152930000	128750000	13	O75822;F5H425;B4DUI3;H0YGJ7;H0YLP3	O75822;F5H425;B4DUI3;H0YGJ7	Eukaryotic translation initiation factor 3 subunit J	EIF3J	5	0.985372	0.761544	1.29391	0.772849	0.93687	0.248101	0.128555
1	1	1	1	1	1	1	1	1	1	1	1	21741000	1	17339000	17470000	1	1	3	O75828	O75828	Carbonyl reductase [NADPH] 3	CBR3	1	1	9.425e+06	1.06101e-07	9.425e+06	#DIV/0!	0.0515426	0.0515426
14185000	33636000	13455000	17695000	12077000	12271000	17129000	15387000	1	1	10851000	1	1	1	1	1	8761600	9112600	3	O75934	O75934	Pre-mRNA-splicing factor SPF27	BCAS2	1	0.419739	0.173	2.42623	0.412161	0.0619665	0.293736	0.00428499
6828800	1	1	1	1	5592100	1	4677600	5286800	1	4839400	9921300	1	1	5684800	1	5385900	1	2	O75935;O75935-3;O75935-2;Q8NB28;F8W786	O75935;O75935-3;O75935-2;Q8NB28;F8W786	Dynactin subunit 3	DCTN3	5	1.9906	0.891296	2.23338	0.447752	0.333139	0.263512	0.90088
12536000	11202000	6301700	5782400	16127000	20111000	13473000	13711000	19400000	15270000	1	9065000	34999000	38139000	14736000	13898000	20265000	29739000	4	O75937;S4R3J5	O75937;S4R3J5	DnaJ homolog subfamily C member 8	DNAJC8	2	0.984165	2.10624	0.467261	2.14013	0.958318	0.0237959	0.0204927
10300000	9992700	15440000	1	6573900	8685000	4181400	2057400	1865300	1	2652100	5092100	3861400	1	3727000	1	3957500	3461800	2	O76021;J3QSV6;I3L3U9;B4DJ58;I3L3C4;I3L234	O76021;J3QSV6;I3L3U9;B4DJ58;I3L3C4;I3L234	Ribosomal L1 domain-containing protein 1	RSL1D1	6	0.310802	0.294317	1.05601	0.94696	0.0240739	0.899663	0.0224947
2345200	2423600	1923100	1	3398700	3483100	3612800	3940300	1	3969900	1	1	4373400	4855700	4134800	3544800	4555600	1	2	O76094;O76094-2;R4GNC1	O76094;O76094-2;R4GNC1	Signal recognition particle 72 kDa protein	SRP72	3	0.848921	1.58132	0.536845	1.86274	0.740647	0.174503	0.175312
109380000	97636000	105300000	101430000	63389000	64351000	90334000	93704000	104110000	90202000	87552000	64655000	65283000	61969000	66546000	71503000	64875000	98801000	14	O94776;Q68DB1;Q9BTC8;E7EV10;Q9BTC8-2;E7EQY4;E9PCS8;D6W5A2;E9PF88;H0YIT0;H7C3F3	O94776;Q68DB1	Metastasis-associated protein MTA2	MTA2;DKFZp686F2281	11	0.979817	0.792222	1.2368	0.808541	0.859353	0.0531635	0.095221
73504000	76619000	68463000	70868000	45767000	43460000	35632000	36517000	35864000	31653000	48738000	43268000	20042000	20813000	25274000	35330000	34942000	38341000	16	O94906;O94906-2	O94906;O94906-2	Pre-mRNA-processing factor 6	PRPF6	2	0.611787	0.461449	1.32579	0.754265	0.00359569	0.0453766	0.000542485
13185000	8631200	6548800	7347800	4209100	1	1	1	1	1	1	1	1	8451800	1	1	1	1	1	O94992	O94992	Protein HEXIM1	HEXIM1	1	1.50293e-07	0.211708	7.09908e-07	1.40863e+06	0.00414661	0.340893	0.0447122
616580	1023400	1	1	2669600	1575600	1684800	2035200	2716200	1577000	1	1	3150700	2679300	2819700	1937500	2620200	2642900	1	O95202	O95202	LETM1 and EF-hand domain-containing protein 1, mitochondrial	LETM1	1	1.36159	2.69326	0.505555	1.97802	0.577894	0.0216603	0.00412511
308070000	370600000	245930000	317360000	239320000	231100000	174560000	174090000	219670000	232480000	262510000	333190000	111340000	115590000	207890000	204550000	162720000	169960000	6	O95218;O95218-2	O95218;O95218-2	Zinc finger Ran-binding domain-containing protein 2	ZRANB2	2	0.815532	0.56766	1.43665	0.696062	0.145665	0.0391113	0.00144099
21917000	27522000	15561000	21641000	29588000	31986000	34082000	37879000	36062000	32273000	27633000	35189000	47956000	34352000	35096000	32805000	58310000	41590000	11	O95347;O95347-2;Q5T821	O95347;O95347-2	Structural maintenance of chromosomes protein 2	SMC2	3	1.37043	1.68747	0.812118	1.23135	0.00995581	0.0988695	0.0050618
16642000	12763000	9173100	8072300	27078000	29365000	45571000	48203000	44092000	50094000	34902000	32785000	82989000	75458000	59881000	59780000	68651000	56014000	4	P41227;P41227-2;C9JN83;Q9BSU3;A8MWP7;F8W808;C9JW55	P41227;P41227-2;C9JN83;Q9BSU3;A8MWP7;F8W808;C9JW55	N-alpha-acetyltransferase 10;N-alpha-acetyltransferase 11	NAA10;NAA11	7	2.47976	3.90687	0.634717	1.5755	0.000305636	0.000808653	5.06685e-06
1796100	3410200	3029800	1	1	1	3708000	1	4300200	6233800	1	4439400	5988400	4072100	4885300	4565500	3792600	4705800	3	O95400	O95400	CD2 antigen cytoplasmic tail-binding protein 2	CD2BP2	1	2.26823	3.40084	0.666962	1.49934	0.187284	0.18381	0.0010384
1	1	1	1	1	1	1	1	1	1	1	1	18490000	5844000	5984600	5284600	6939700	1	2	Q9BZZ5-2;Q9BZZ5-5;Q9BZZ5;G3V1C3;Q9BZZ5-3;E9PQK6	Q9BZZ5-2;Q9BZZ5-5;Q9BZZ5;G3V1C3;Q9BZZ5-3;E9PQK6	Apoptosis inhibitor 5	API5	6	1	7.09048e+06	1.41034e-07	7.09048e+06	#DIV/0!	0.0173858	0.0173858
12171000	18096000	14091000	18003000	7727200	10909000	6681400	8724500	6560300	7488500	5883700	6713200	2599100	7066800	5948400	6080500	7110300	7678700	4	O95721;C9JAF7	O95721;C9JAF7	Synaptosomal-associated protein 29;Synaptosomal-associated protein	SNAP29	2	0.519174	0.450433	1.15261	0.867596	0.00359294	0.299346	0.00229452
4947100	9244000	29830000	20296000	12674000	19484000	4821400	1	5516500	6369100	5469600	5269300	1856000	8876400	6620100	6470600	1355800	1	4	O95793;O95793-3;O95793-2;Q5JW30;Q9NUL3;E9PH62;Q9NUL3-2;E7EVJ4;Q9NUL3-7;E7EPX0;F8VPI7;Q9NUL3-3;Q9NUL3-8;Q9NUL3-6;E7EVI1;E5RJN7;Q9NUL3-4;G5EA18	O95793;O95793-3;O95793-2;Q5JW30;Q9NUL3;E9PH62;Q9NUL3-2;E7EVJ4;Q9NUL3-7;E7EPX0;F8VPI7;Q9NUL3-3;Q9NUL3-8;Q9NUL3-6;E7EVI1;E5RJN7;Q9NUL3-4;G5EA18	Double-stranded RNA-binding protein Staufen homolog 1;Double-stranded RNA-binding protein Staufen homolog 2	STAU1;STAU2	18	0.284487	0.260989	1.09004	0.917401	0.0122679	0.832148	0.0129208
8329100	8714000	8152400	8519200	9120700	9794900	12092000	16611000	18449000	19013000	23846000	24599000	13930000	13540000	22279000	22014000	19759000	20838000	2	O95816;B4DXE2	O95816;B4DXE2	BAG family molecular chaperone regulator 2	BAG2	2	2.17764	2.13489	1.02002	0.980368	0.00030708	0.883704	0.000120275
28989000	37128000	1	9985200	18683000	26943000	53577000	70442000	43510000	47667000	62642000	37189000	33199000	45360000	56625000	51107000	50822000	66904000	4	O95831;O95831-3;O95831-2;O95831-4;E9PMA0;O95831-5;O95831-6	O95831;O95831-3;O95831-2;O95831-4;E9PMA0;O95831-5;O95831-6	Apoptosis-inducing factor 1, mitochondrial	AIFM1	7	2.58795	2.49751	1.03622	0.965051	0.00157545	0.793483	0.00177779
876400000	863500000	1262400000	977240000	701260000	897570000	1080700000	1189300000	1275200000	1310900000	1633800000	1829200000	834180000	1013500000	1212600000	1226200000	1156800000	1300300000	10	O95881	O95881	Thioredoxin domain-containing protein 12	TXNDC12	1	1.49131	1.20888	1.23363	0.810614	0.00825718	0.0821908	0.089493
1	1	1	1	1	1	3196000	1	1	1	1	1	3200300	1	3525900	5040700	1	1	2	O96019;O96019-2;H7C5S0	O96019;O96019-2;H7C5S0	Actin-like protein 6A	ACTL6A	3	532668	1.96115e+06	0.27161	3.68175	0.340893	0.206333	0.0572497
10481000	13799000	5970100	3882300	31312000	29181000	26814000	29639000	22448000	17990000	12154000	7748400	50053000	47519000	26694000	31412000	42701000	43178000	4	Q15185;B4DP11;B4DP21;B4DHP2;B4DDC6	Q15185;B4DP11;B4DP21;B4DHP2;B4DDC6	Prostaglandin E synthase 3	PTGES3	5	1.23427	2.55277	0.483502	2.06824	0.546264	0.00226553	0.00245802
4040900	4208000	1	4743900	8706200	9443200	9234200	13906000	6555500	8835500	5227000	1	42715000	38581000	14705000	12724000	26616000	22483000	2	O95433;B4DUR9;H0YJG7;G3V438;H0YJ63	O95433;B4DUR9;H0YJG7;G3V438;H0YJ63	Activator of 90 kDa heat shock protein ATPase homolog 1	AHSA1	5	1.40511	5.06785	0.277259	3.60673	0.394786	0.00529054	0.00230722
9768100	11740000	9020200	8065100	65449000	22079000	20318000	25210000	24947000	23206000	1	1	92132000	86921000	40739000	33143000	30890000	28618000	3	P00403	P00403	Cytochrome c oxidase subunit 2	MT-CO2	1	0.742784	2.47732	0.299834	3.33518	0.614534	0.0184805	0.0661704
20198000	24019000	12263000	5994900	54095000	60878000	57558000	73237000	65203000	57980000	27685000	48522000	148750000	141690000	99304000	99881000	84239000	75518000	7	P00492	P00492	Hypoxanthine-guanine phosphoribosyltransferase	HPRT1	1	1.86074	3.65956	0.50846	1.96672	0.0471207	0.00333415	0.000458319
28516000	31971000	13048000	11535000	91790000	85738000	79928000	73507000	41121000	36846000	7094100	11275000	196770000	239860000	76590000	93443000	76092000	132490000	12	P15311;E7EQR4;P35241-3;E9PNV3;E9PQ82	P15311;E7EQR4	Ezrin	EZR	5	0.951154	3.10454	0.306376	3.26397	0.91348	0.0115891	0.0152922
1	7719100	1	1	5312500	6122300	5602400	1	1	1	1	1	12283000	7594000	1	1	8797400	10427000	2	Q5T9B7;P00568	Q5T9B7;P00568	Adenylate kinase isoenzyme 1	AK1	2	0.292494	2.04143	0.143279	6.9794	0.222165	0.0390409	0.231143
1	1	1	1	1	1	1	1	1	1	1	1	26698000	326350000	30637000	1	1	1	1	P00742	P00742	Coagulation factor X;Factor X light chain;Factor X heavy chain;Activated factor Xa heavy chain	F10	1	1	6.39475e+07	1.56378e-08	6.39475e+07	#DIV/0!	0.253651	0.253651
19630000	27839000	7808900	1	36536000	44534000	25949000	25656000	8771700	1	1	1	37583000	39249000	23545000	26163000	16990000	16297000	5	P00918;E5RK37;E5RID5	P00918	Carbonic anhydrase 2	CA2	3	0.442814	1.1722	0.377763	2.64716	0.173728	0.0299707	0.636126
1	1	1	1	1	1	13340000	9521800	12555000	1	1	1	1	1	1	1	1	1	2	P01605;P04207;H7C1X1;P01624	P01605;P04207;H7C1X1;P01624	Ig kappa chain V-I region Lay;Ig kappa chain V-III region CLL;Ig kappa chain V-III region POM		4	5.9028e+06	1	5.9028e+06	1.69411e-07	0.0529934	0.0529934	#DIV/0!
3721400	85680000	37674000	76041000	20207000	14606000	5452800	10253000	9885600000	4364800000	8802400000	166110000	3757600	13221000000	3979300	17491000	13197000000	13280000000	2	P06310;P06309;P01614;P01617	P06310;P06309;P01614;P01617	Ig kappa chain V-II region RPMI 6410;Ig kappa chain V-II region GM607;Ig kappa chain V-II region Cum;Ig kappa chain V-II region TEW		4	97.6534	166.954	0.584913	1.70966	0.0669011	0.450037	0.0502275
12627000	10884000	4952600	6022800	26836000	14155000	20511000	36081000	30709000	39958000	30492000	36285000	46971000	46237000	53896000	45525000	47782000	45931000	6	Q13148;G3V162;B1AKP7;B4DJ45;K7EJM5;K7EN94;K7EL26	Q13148;G3V162;B1AKP7;B4DJ45;K7EJM5;K7EN94	TAR DNA-binding protein 43	TARDBP	7	2.57078	3.79374	0.677637	1.47572	0.000917783	0.000526977	1.36947e-06
269460000	230300000	265570000	233520000	141670000	173450000	76408000	51530000	114520000	102370000	106770000	105990000	22487000	22687000	40705000	32704000	38667000	43116000	24	E7EQS8;Q6N021;Q6N021-3;E7EPB1;Q6N021-2	E7EQS8;Q6N021	Methylcytosine dioxygenase TET2	TET2	5	0.424354	0.152489	2.78285	0.359344	0.000278263	0.000208241	5.36281e-06
194960000	216280000	137930000	131740000	235360000	242140000	157530000	153520000	353430000	346420000	810710000	922620000	83988000	92330000	151300000	138500000	114030000	93531000	1	P01859	P01859	Ig gamma-2 chain C region	IGHG2	1	2.36896	0.581555	4.0735	0.245489	0.0813988	0.0289771	0.005037
957670000	1056100000	388710000	328050000	144340000	151000000	288960000	329850000	225270000	223860000	383320000	426340000	119880000	111900000	107050000	124230000	197470000	209280000	14	P10412;P16402;Q02539;P22492;P16401	P10412;P16402	Histone H1.4;Histone H1.3	HIST1H1E;HIST1H1D	5	0.620516	0.287458	2.15863	0.463256	0.280231	0.00144911	0.0547605
144680000	140820000	152000000	155700000	102770000	93323000	88368000	87436000	92486000	81201000	111530000	101510000	35757000	29727000	46345000	43447000	40215000	40943000	17	Q8IWI9-4;Q8IWI9;Q8IWI9-3;H3BU53;Q8IWI9-2	Q8IWI9-4;Q8IWI9;Q8IWI9-3;H3BU53;Q8IWI9-2	MAX gene-associated protein	MGA	5	0.712702	0.299552	2.37923	0.420304	0.00930141	8.76552e-07	8.78994e-06
4842500	3893700	13746000	15640000	1	20432000	5862800	14144000	16059000	24355000	60322000	116270000	14337000	14256000	16401000	19090000	12880000	8746200	3	P02790	P02790	Hemopexin	HPX	1	4.04775	1.46378	2.76528	0.361627	0.120244	0.174784	0.231362
1	1	1	1	1	1	1	1	1	1	1	1	1	1	1	1	1	1	2	P02808	P02808	Statherin	STATH	1	1	1	1	1	#DIV/0!	#DIV/0!	#DIV/0!
13874000	17508000	14574000	17804000	54608000	56876000	67063000	50364000	52903000	42649000	19096000	14027000	126550000	126200000	49836000	45502000	52985000	92555000	10	Q12931;F5H897;I3L0K7;I3L239;I3L253	Q12931;F5H897;I3L0K7	Heat shock protein 75 kDa, mitochondrial	TRAP1	5	1.40434	2.8168	0.498558	2.00579	0.344257	0.0417993	0.0133391
1	1	1	1	1	1	1	1	47745000	51603000	1	9018900	1	1	1	1	1	1	4	P04083;Q5T3N1	P04083;Q5T3N1	Annexin A1;Annexin	ANXA1	2	1.80612e+07	1	1.80612e+07	5.53675e-08	0.104335	0.104335	#DIV/0!
96188000	129260000	127850000	118790000	93114000	121570000	164450000	176180000	165490000	184740000	137750000	174440000	248190000	289330000	234130000	268740000	224380000	207370000	15	P04181;P04181-2	P04181;P04181-2	Ornithine aminotransferase, mitochondrial;Ornithine aminotransferase, hepatic form;Ornithine aminotransferase, renal form	OAT	2	1.46053	2.14356	0.681355	1.46766	0.000201333	0.000222985	2.66072e-06
6843300000	7115000000	4765600000	4650300000	2857100000	2926000000	4051500000	4372400000	7278600000	7367300000	4526600000	4721300000	6033700000	5773800000	4439800000	4174100000	5932200000	5834600000	50	P04264;CON__P04264;F8VP67;CON__H-INV:HIT000016045;F5GY66	P04264;CON__P04264	Keratin, type II cytoskeletal 1	KRT1	5	1.10839	1.10395	1.00402	0.995993	0.638619	0.982843	0.555217
30486000	25999000	9182000	9751400	76951000	73737000	63365000	62920000	44724000	44201000	14969000	21407000	200730000	226500000	201500000	229130000	93263000	137850000	5	P39687;H0YN26;O43423;O95626;H7BZ09	P39687;H0YN26	Acidic leucine-rich nuclear phosphoprotein 32 family member A	ANP32A	5	1.11269	4.8162	0.231031	4.32843	0.781827	0.00015209	0.000209949
31491000	23843000	14385000	18711000	71405000	59087000	86872000	151230000	69693000	73189000	39347000	19430000	275180000	216630000	81034000	114480000	197660000	138020000	7	P09936;D6RE83;D6R956;D6R974;D6RF53	P09936;D6RE83;D6R956;D6R974	Ubiquitin carboxyl-terminal hydrolase isozyme L1	UCHL1	5	2.00876	4.67292	0.429872	2.32627	0.108005	0.0190301	0.0014901
4426300	1	1	5661900	8570700	8105000	1	1	42327000	23035000	23776000	1	1	4888100	33180000	17313000	1	1	2	P04434	P04434	Ig kappa chain V-III region VH		1	3.33053	2.06925	1.60954	0.621296	0.189357	0.549618	0.42458
16401000	16601000	22403000	20036000	15260000	20266000	14202000	14368000	18265000	14234000	16988000	19117000	15804000	14028000	16826000	12051000	19608000	19177000	4	P04637;P04637-4;P04637-3;J3KP33;P04637-2;P04637-6;P04637-5;P04637-7;E7EQX7;P04637-9;P04637-8;E7ESS1;E7EMR6;E9PFT5;S4R334;E9PCY9	P04637;P04637-4;P04637-3;J3KP33;P04637-2;P04637-6;P04637-5;P04637-7;E7EQX7;P04637-9;P04637-8;E7ESS1	Cellular tumor antigen p53	TP53	16	0.875702	0.878586	0.996718	1.00329	0.146099	0.972347	0.204664
99605000	110670000	189560000	124580000	133740000	126250000	185600000	185490000	169480000	148220000	157290000	223330000	104780000	100070000	178810000	203500000	184350000	200440000	4	P04745;P04746;P19961;B3KTI1;CON__Q3MHH8	P04745;P04746;P19961;B3KTI1;CON__Q3MHH8	Alpha-amylase 1;Pancreatic alpha-amylase;Alpha-amylase 2B	AMY1A;AMY2A;AMY2B	5	1.36334	1.23909	1.10027	0.908866	0.0511634	0.521134	0.125641
24314000	32724000	14610000	30180000	27019000	48378000	63120000	47926000	48197000	46655000	33277000	26049000	113570000	117480000	63341000	43805000	79185000	51189000	16	P04843;B7Z4L4;F8WF32	P04843;B7Z4L4	Dolichyl-diphosphooligosaccharide--protein glycosyltransferase subunit 1	RPN1	3	1.49654	2.64393	0.566029	1.7667	0.0621749	0.0346371	0.00509627
1	1	1	1	4367000	1	4671600	4656200	1	4750600	1	1	7761100	8786500	6840500	1	6135800	6472000	2	P04844;P04844-2	P04844;P04844-2	Dolichyl-diphosphooligosaccharide--protein glycosyltransferase subunit 2	RPN2	2	3.22381	8.2427	0.391111	2.55682	0.233744	0.0502563	0.00470948
61518000	38552000	50852000	39675000	88795000	138550000	133050000	131260000	142650000	114420000	77286000	104230000	203960000	171880000	138630000	113990000	172720000	171280000	18	P05023;P05023-4;P05023-3;P05023-2;P13637-3;P13637-2;P13637;M0R116;P50993;B1AKY9;Q13733;H0Y7C1;Q5TC01;P54707-2;P54707;P20648;E9PRA5;M0QXF2;Q5TC05;Q5TC02	P05023;P05023-4;P05023-3;P05023-2	Sodium/potassium-transporting ATPase subunit alpha-1	ATP1A1	20	1.6818	2.32678	0.722802	1.3835	0.0280091	0.0191013	0.00103803
784130000	793770000	721220000	780850000	850460000	753500000	2116700000	2125700000	2581200000	2667700000	3777600000	4398700000	1864800000	1856200000	2705800000	2685400000	2733900000	2424800000	23	P05141	P05141	ADP/ATP translocase 2	SLC25A5	1	3.77196	3.04678	1.23802	0.807744	0.000209029	0.205347	2.92763e-06
185280000	214230000	210480000	254760000	137460000	131150000	136110000	98908000	108140000	107860000	107870000	99240000	74465000	81759000	99204000	111390000	81536000	99633000	10	P05198;G3V4T5;H0YJS4	P05198;G3V4T5;H0YJS4	Eukaryotic translation initiation factor 2 subunit 1	EIF2S1	3	0.580688	0.483507	1.20099	0.832645	0.0029594	0.0454737	0.00073435
41588000	38548000	40954000	50211000	64911000	60120000	49499000	51392000	54442000	47068000	45496000	48654000	64315000	78322000	60163000	61873000	58100000	51333000	1	P05386	P05386	60S acidic ribosomal protein P1	RPLP1	1	1.00074	1.26246	0.792692	1.26152	0.99393	0.00771438	0.0494784
365650000	351490000	302660000	306510000	421860000	362290000	370260000	290650000	252340000	246720000	272190000	329360000	489100000	389110000	246570000	317610000	331570000	254620000	7	P05387;H0YDD8	P05387	60S acidic ribosomal protein P2	RPLP2	2	0.834662	0.961203	0.868351	1.15161	0.0535372	0.313374	0.747224
521730000	508640000	570890000	631720000	607860000	470130000	629280000	563930000	579330000	552320000	641020000	640030000	597000000	626860000	550440000	587830000	508230000	502650000	16	P05388;F8VWS0;Q3B7A4;F8VU65;F8VW21;Q8NHW5;G3V210;F8VZS0;F8VRK7;F8VPE8;F8VQY6;F8VS58;F8VWV4;F8W1K8;F8VYN4	P05388;F8VWS0;Q3B7A4;F8VU65;F8VW21;Q8NHW5;G3V210;F8VZS0;F8VRK7;F8VPE8;F8VQY6;F8VS58;F8VWV4	60S acidic ribosomal protein P0;60S acidic ribosomal protein P0-like	RPLP0;RPLP0P6	15	1.08908	1.01874	1.06905	0.935412	0.135334	0.17106	0.757978
78419000	86677000	42817000	43126000	174270000	182160000	164550000	111070000	101160000	76942000	45826000	38422000	247970000	276890000	137660000	157670000	179180000	179540000	14	P05455;E7ERC4;E9PFL9;E9PGX9	P05455	Lupus La protein	SSB	4	0.885593	1.94069	0.456328	2.1914	0.723147	0.0044	0.0179754
39899000	29688000	26204000	23442000	35347000	33196000	37489000	39060000	24326000	28537000	18626000	20197000	61969000	61524000	35085000	34850000	37881000	43627000	1	P08590;P05976;P05976-2	P08590;P05976;P05976-2	Myosin light chain 3;Myosin light chain 1/3, skeletal muscle isoform	MYL3;MYL1	3	0.895935	1.46417	0.611906	1.63424	0.468005	0.0178919	0.0302659
64312000	70900000	46246000	49727000	81001000	119490000	111760000	103510000	114520000	102160000	96636000	123850000	167920000	168550000	140830000	159230000	148620000	163020000	8	P06493;P06493-2;E5RIU6;G3V5T9;Q00526;P24941;P24941-2;E7ESI2;K7ELV5;Q14004;Q9NYV4;Q9NYV4-2;Q14004-2;Q9NYV4-3;J3QSD7;Q00536-2;Q07002-3;Q00536-3;Q00536;Q07002-2;Q07002;O94921;O94921-2;Q96Q40;Q96Q40-5;O94921-3;Q96Q40-3;E5RGN0;Q96Q40-4;Q96Q40-2;E7EUK8;H0YAZ9;K7EJ83;F8VZ51;F8VZZ0;B4DNF9;F8VXD2;G3V317	P06493;P06493-2;E5RIU6	Cyclin-dependent kinase 1	CDK1	38	1.5114	2.19649	0.6881	1.45328	0.0100042	1.04084e-05	2.61081e-05
61020000	70445000	27892000	45368000	121420000	131890000	148010000	188770000	119720000	189960000	67108000	20009000	372340000	424110000	184720000	179980000	268580000	285090000	14	P53396;P53396-2;B4E3P0;K7ESG8;K7EIE7	P53396;P53396-2;B4E3P0	ATP-citrate synthase	ACLY	5	1.60157	3.74386	0.427787	2.33761	0.189151	0.00736772	0.000718873
1	3389900	3072500	1	7858000	6847300	5864700	5174000	3888200	4816900	1	1	19057000	11372000	6516100	7411000	10335000	13402000	4	Q9H9B4;D6RFI0;S4R2X2;D6RDG7;D6RAE9	Q9H9B4;D6RFI0;S4R2X2;D6RDG7;D6RAE9	Sideroflexin-1	SFXN1	5	0.932732	3.21684	0.289953	3.44883	0.893386	0.00374268	0.00673114
56432000	61879000	17597000	14224000	188510000	203490000	124620000	116300000	41897000	70168000	1	13446000	361370000	291800000	156580000	151860000	117650000	144150000	13	P06744-2;P06744;K7EQ48;K7EPY4;K7ENA0;K7EP41;K7ELR7;K7ERC6;K7ERK8;CON__Q3ZBD7;K7EIL4;Q8N196;K7ESF4	P06744-2;P06744;K7EQ48	Glucose-6-phosphate isomerase	GPI	13	0.675907	2.25666	0.299516	3.33872	0.485414	0.0104849	0.0574244
918760000	929380000	659740000	601200000	1098000000	1007800000	1165400000	1175600000	1232300000	1180200000	983720000	1021800000	1669600000	1639300000	1397400000	1377700000	1640500000	1630800000	16	P06748;P06748-2;P06748-3;E5RI98;E5RGW4	P06748;P06748-2;P06748-3	Nucleophosmin	NPM1	5	1.2961	1.79396	0.72248	1.38412	0.0169169	8.2309e-05	3.26602e-05
209830000	225570000	163820000	113750000	251650000	259270000	240460000	247320000	211620000	208640000	193310000	141550000	402910000	433090000	274130000	268870000	287980000	311540000	19	P06753-2;P06753-5;Q5VU58;P06753-3;Q5VU59;Q5VU61;J3KN67;P06753-4;P06753;D6R904;A6NL28;A6NL28-2;D6RFM2	P06753-2;P06753-5;Q5VU58;P06753-3;Q5VU59;Q5VU61;J3KN67;P06753-4;P06753	Tropomyosin alpha-3 chain	TPM3	13	1.01553	1.61658	0.628197	1.59186	0.910825	0.00381325	0.00651002
1	1	1	1	1	1	156590000	202280000	264960000	232160000	365110000	304190000	124180000	131720000	210760000	238350000	260670000	196770000	4	Q96B02-3;Q96B02-2;Q96B02;H3BMM0;C9JJH0;H0YB73;E5RG25	Q96B02-3;Q96B02-2;Q96B02;H3BMM0;C9JJH0;H0YB73	Ubiquitin-conjugating enzyme E2 W	UBE2W	7	254215000	1.93742e+08	1.31213	0.762117	7.84556e-06	0.141605	6.64103e-06
1	10013000	5415400	5712900	6846200	6776400	9662000	11172000	9100600	1	1	1	18627000	25365000	10717000	8668500	20473000	12804000	3	P09622;E9PEX6;B4DHG0;B4DT69	P09622;E9PEX6;B4DHG0;B4DT69	Dihydrolipoyl dehydrogenase, mitochondrial;Dihydrolipoyl dehydrogenase	DLD	4	0.861083	2.78031	0.309707	3.22886	0.764602	0.00919452	0.0056902
33524000	32948000	18335000	17512000	65552000	83699000	66005000	62056000	58655000	59993000	29022000	19641000	129260000	108730000	72775000	61439000	75898000	75802000	12	P07237;H7BZ94;F5H8J2;H0Y3Z3;I3L0S0;I3L3U6;I3L312;I3NI03;I3L3P5;I3L398;I3L514;I3L1Y5	P07237;H7BZ94;F5H8J2;H0Y3Z3	Protein disulfide-isomerase	P4HB	12	1.17411	2.08254	0.56379	1.77371	0.602912	0.0167657	0.0138538
3283300	3902200	3166100	3172800	2628500	2704600	1	1	9725000	1	9500800	1	1	2166800	1	1	11667000	1	1	P07305;P07305-2	P07305;P07305-2	Histone H1.0	H1F0	2	1.01953	0.733597	1.38977	0.719544	0.976535	0.75331	0.671179
1078600000	1028800000	1234000000	994240000	1339900000	1264800000	1439700000	1051100000	1079100000	1126500000	1108100000	1032300000	1209300000	1846900000	1581300000	1372900000	1360200000	1402700000	24	P07437;Q5JP53;Q5ST81;E9PBJ4;A6NNZ2;I3L2F9;Q5SQY0;F5H0I4;A6NKZ8;CON__ENSEMBL:ENSBTAP00000025008;Q9H4B7;G3V2A3;G3V2N6;G3V3R4;G3V2R8;G3V5W4	P07437;Q5JP53;Q5ST81;E9PBJ4	Tubulin beta chain	TUBB	16	0.985081	1.2641	0.779273	1.28325	0.842312	0.0148621	0.0176721
3911400	3446500	1	2783300	1	1	1	12231000	1	1	7557700	1	16526000	15756000	10131000	11867000	15501000	20031000	1	Q92530;Q5QPM7;Q5QPM9;F5H4Z3	Q92530;Q5QPM7;Q5QPM9;F5H4Z3	Proteasome inhibitor PI31 subunit	PSMF1	4	1.95132	8.85615	0.220335	4.53855	0.501132	0.00117589	1.0074e-05
11294000	34007000	1	1	28176000	19718000	1	28017000	1	1	1	1	50176000	40558000	1	1	1	1	4	P07741;H3BQB1;H3BQZ9;H3BQF1;P07741-2;H3BSW3	P07741;H3BQB1;H3BQZ9;H3BQF1;P07741-2;H3BSW3	Adenine phosphoribosyltransferase	APRT	6	0.300628	0.973593	0.308782	3.23853	0.176455	0.352321	0.971681
269760000	260320000	222930000	248400000	301250000	297730000	434430000	435240000	432720000	459980000	434230000	418950000	560660000	563440000	532440000	461090000	531450000	548950000	41	P07814	P07814	Bifunctional glutamate/proline--tRNA ligase;Glutamate--tRNA ligase;Proline--tRNA ligase	EPRS	1	1.63432	1.99828	0.817863	1.2227	1.73475e-07	0.000142384	9.21934e-08
1	9314600	1	1	5889100	10924000	11783000	12505000	10670000	8215200	10186000	1	29537000	19645000	10605000	10340000	19140000	20518000	9	P26038;P35241-5;P35241;P35241-4	P26038;P35241-5;P35241;P35241-4	Moesin;Radixin	MSN;RDX	4	2.04225	4.20186	0.486034	2.05747	0.134295	0.0220437	0.00295709
1	1	1	1	1	1	2143800	2764400	3455400	3451800	3067800	2736200	2560700	2008800	3859600	3955400	1940200	1891700	1	P07919	P07919	Cytochrome b-c1 complex subunit 6, mitochondrial	UQCRH	1	2.93657e+06	2.70273e+06	1.08652	0.920372	5.22314e-08	0.609456	4.37163e-05
34271000	34309000	26862000	22815000	25455000	36076000	59378000	52172000	58632000	57984000	70255000	69782000	36619000	42295000	56471000	55934000	60095000	58544000	6	Q8NE71;Q8NE71-2;H0YGW7;Q5STZ8;Q5STZ7;F5GYK6	Q8NE71;Q8NE71-2;H0YGW7	ATP-binding cassette sub-family F member 1	ABCF1	6	2.04798	1.72402	1.18791	0.841813	7.1725e-06	0.0776068	0.000797833
4772700	13558000	13999000	12603000	14935000	9418200	32332000	34040000	12760000	11715000	51490000	227720000	12663000	7425000	12617000	12133000	11747000	16231000	6	P08123	P08123	Collagen alpha-2(I) chain	COL1A2	1	5.34101	1.05095	5.08208	0.19677	0.168798	0.173198	0.767686
18217000	11852000	1	3074800	21389000	32793000	22775000	22349000	32944000	13170000	1	1	70018000	69611000	25998000	23828000	34098000	31374000	7	P00367;P49448;B4DGN5;B3KV55	P00367;P49448;B4DGN5	Glutamate dehydrogenase 1, mitochondrial;Glutamate dehydrogenase 2, mitochondrial;Glutamate dehydrogenase	GLUD1;GLUD2	4	1.0448	2.91926	0.357899	2.79409	0.931327	0.0246193	0.0197946
15756000	13872000	6370600	1	29923000	27463000	35110000	43717000	41007000	40391000	24248000	21086000	100660000	74854000	61988000	55834000	51279000	43790000	9	P08243;P08243-2;P08243-3;F8WEJ5;C9J057;C9JT45;C9JM09;C9JLN6	P08243;P08243-2;P08243-3	Asparagine synthetase [glutamine-hydrolyzing]	ASNS	8	2.20121	4.1592	0.529239	1.88951	0.0121747	0.0079111	0.000456866
10211000	13794000	10321000	11543000	15296000	15932000	15813000	18327000	21570000	22978000	14971000	16376000	23070000	18869000	21553000	18857000	20292000	21297000	2	P08559-4;P08559-2;P08559;P08559-3;Q5JPU3;P29803	P08559-4;P08559-2;P08559;P08559-3;Q5JPU3;P29803	Pyruvate dehydrogenase E1 component subunit alpha, somatic form, mitochondrial;Pyruvate dehydrogenase E1 component subunit alpha, testis-specific form, mitochondrial	PDHA1;PDHA2	6	1.42723	1.60756	0.887823	1.12635	0.00854863	0.152451	8.12958e-05
1	1	1	1	1	1	1	12359000	1	1	39620000	87543000	1	1	1	1	15193000	12400000	2	P08572;A2A352	P08572;A2A352	Collagen alpha-2(IV) chain;Canstatin	COL4A2	2	2.32537e+07	4598834	5.05643	0.197768	0.135185	0.23037	0.14769
1296400	1684000	1541100	1	3102800	2548600	1	1	1	1	1	4567000	31404000	1	1	1	1	1	2	P08574	P08574	Cytochrome c1, heme protein, mitochondrial	CYC1	1	0.448938	3.08703	0.145427	6.87628	0.312493	0.417509	0.515768
57092000	59676000	87336000	81006000	44470000	38843000	23513000	27465000	36391000	29371000	35712000	39864000	13641000	14762000	20010000	20060000	17018000	19514000	4	P08579	P08579	U2 small nuclear ribonucleoprotein B	SNRPB2	1	0.521998	0.285012	1.83149	0.546002	0.0054034	0.000394831	0.000262863
110770000	98298000	80271000	86870000	70810000	70407000	48953000	46626000	51320000	51883000	70428000	71679000	38374000	36775000	48566000	44470000	45795000	52720000	8	P08621;P08621-2;P08621-3;M0QYR1;P08621-4;M0QX04	P08621;P08621-2;P08621-3;M0QYR1	U1 small nuclear ribonucleoprotein 70 kDa	SNRNP70	6	0.658817	0.515436	1.27817	0.782366	0.00411659	0.0385765	0.000132001
2156500000	2173400000	2200600000	2221200000	2451400000	2410400000	1506600000	1491600000	1781700000	1772500000	1463400000	1429400000	2422500000	2358400000	1777200000	1679200000	1949600000	1976700000	50	P08670;B0YJC4;B0YJC5;Q5JVS8;P17661;P41219-2;P41219;H7C5W5;P07197;E7ESP9;E7EMV2;P07197-2;Q16352;P07196;F8W835	P08670;B0YJC4	Vimentin	VIM	15	0.693811	0.893495	0.776514	1.28781	8.31549e-06	0.00880848	0.101903
2278000000	2181400000	1969700000	2280700000	1475700000	1593000000	882710000	824610000	924450000	910350000	1144800000	1046200000	559780000	697890000	973510000	953980000	798900000	762810000	11	P08708;P0CW22;H0YK46;H0YN88;H0YN73;H3BNC9;REV__Q9H089;REV__F8WFC6	P08708;P0CW22;H0YK46;H0YN88	40S ribosomal protein S17;40S ribosomal protein S17-like	RPS17;RPS17L	8	0.486744	0.403011	1.20777	0.827973	5.81571e-05	0.0671941	2.22013e-05
142140000	154370000	65737000	56039000	423440000	358950000	255300000	312090000	240120000	239530000	69858000	62767000	846020000	747230000	350830000	357090000	426540000	451210000	18	P00558;B7Z7A9;E7ERH5;P07205	P00558;B7Z7A9	Phosphoglycerate kinase 1;Phosphoglycerate kinase	PGK1	4	0.982501	2.64761	0.37109	2.69477	0.964217	0.0062661	0.01178
4498600	7361600	4431600	7078600	6191700	3866700	1	6670900	1	6317100	6930200	7138300	6930600	1	6638000	5687400	6404000	8851200	2	P09234;Q5TAL2	P09234;Q5TAL2	U1 small nuclear ribonucleoprotein C	SNRPC	2	0.809377	1.03238	0.783992	1.27552	0.510289	0.52485	0.898033
7155300	4207900	4538200	4778400	6980400	6541400	1	1	1	5071200	6804800	8164900	4987300	5774500	1	6960600	3403100	1	1	P09382	P09382	Galectin-1	LGALS1	1	0.585964	0.617676	0.948659	1.05412	0.180559	0.928452	0.131331
114640000	130950000	42662000	49741000	262980000	269040000	314970000	340490000	247340000	266090000	153530000	169450000	603530000	646860000	305960000	327990000	376740000	409850000	15	P09429;Q5T7C4;Q5T7C6;B2RPK0;Q5T7C0;P23497	P09429;Q5T7C4;Q5T7C6;B2RPK0	High mobility group protein B1;Putative high mobility group protein B1-like 1	HMGB1;HMGB1P1	6	1.71477	3.06999	0.558558	1.79032	0.070154	0.0145721	0.00189105
56217000	43848000	39572000	41354000	59922000	61128000	54368000	47977000	69132000	69262000	45966000	63582000	71009000	70549000	87842000	72415000	113020000	87212000	7	P09496;P09496-3;P09496-4;P09496-2;F8WF69;C9J8P9;P09496-5	P09496;P09496-3;P09496-4;P09496-2;F8WF69;C9J8P9;P09496-5	Clathrin light chain A	CLTA	7	1.15973	1.66218	0.697718	1.43324	0.198169	0.00970932	0.00164843
22525000	10513000	7401000	8722800	15783000	10952000	15120000	30793000	23664000	18436000	7510500	16142000	16602000	18511000	15292000	17210000	18254000	19419000	2	P09497;P09497-2	P09497;P09497-2	Clathrin light chain B	CLTB	2	1.47128	1.38725	1.06057	0.942887	0.164254	0.753938	0.06581
136100000	162200000	178280000	164640000	118370000	123880000	93013000	84577000	106410000	107740000	137530000	131600000	70204000	61184000	82070000	61952000	75241000	79826000	10	P09661;H0YMA0;H0YKK0;H0YLR3	P09661;H0YMA0;H0YKK0;H0YLR3	U2 small nuclear ribonucleoprotein A	SNRPA1	4	0.748039	0.487257	1.5352	0.651379	0.0179758	0.00198709	3.27493e-05
18877000	1	1	1	1	21529000	15820000	16508000	14041000	15384000	17642000	16030000	69725000	22185000	16081000	14786000	47562000	26678000	2	P09669	P09669	Cytochrome c oxidase subunit 6C	COX6C	1	2.36165	4.87593	0.484349	2.06463	0.0588058	0.0843555	0.0237973
38855000	34405000	9773400	14369000	19490000	21603000	16886000	18101000	16099000	17222000	20772000	17562000	18180000	36694000	14029000	13649000	14276000	16786000	7	P09874;Q5VX85;Q5VX84	P09874	Poly [ADP-ribose] polymerase 1	PARP1	3	0.770004	0.820345	0.938634	1.06538	0.283471	0.758977	0.497191
752110000	682610000	324760000	301110000	1695800000	2370200000	1705900000	1593200000	1205900000	1299900000	520580000	537120000	4455700000	3535800000	1828000000	1619100000	2049600000	2295000000	23	P04406;P04406-2;E7EUT5;O14556	P04406;P04406-2;E7EUT5	Glyceraldehyde-3-phosphate dehydrogenase	GAPDH	4	1.12013	2.57618	0.434804	2.29989	0.764627	0.0142964	0.0179887
5366900	9283300	1	2467300	17635000	11559000	11384000	18898000	1	14899000	1	1	68813000	18467000	10916000	11418000	19234000	18973000	3	P09960;P09960-4;P09960-2;P09960-3;B4DEH5	P09960;P09960-4;P09960-2;P09960-3	Leukotriene A-4 hydrolase	LTA4H	5	0.975589	3.19189	0.305647	3.27175	0.966568	0.10606	0.100461
132240000	81902000	23689000	19102000	4211700	5142000	9189300	7272300	9210900	9172800	13122000	12698000	1	7316300	5281500	6260100	13264000	11629000	5	P0C0S5;Q71UI9;C9J0D1;Q71UI9-2;Q71UI9-4;Q71UI9-3;C9J386	P0C0S5;Q71UI9;C9J0D1;Q71UI9-2;Q71UI9-4;Q71UI9-3;C9J386	Histone H2A.Z;Histone H2A.V;Histone H2A	H2AFZ;H2AFV	7	0.227819	0.1643	1.38661	0.721185	0.135629	0.219771	0.110504
284280000	327540000	323330000	345420000	198100000	162970000	28079000	26693000	30818000	47872000	41581000	18629000	7286900	14794000	19208000	13500000	22771000	9623800	35	Q9P219;Q9P219-2;Q9P219-3;G3V3S0;Q0P665	Q9P219	Protein Daple	CCDC88C	5	0.117975	0.0531077	2.22142	0.450162	1.56999e-05	0.00495343	7.93057e-06
559780000	502040000	202290000	169300000	1400400000	1407700000	1202000000	1316800000	813020000	872870000	227540000	245600000	2736400000	2532800000	1527100000	1167000000	1466300000	1517000000	19	P07195;A8MW50;C9J7H8;F5H793	P07195;A8MW50	L-lactate dehydrogenase B chain;L-lactate dehydrogenase	LDHB	4	1.10287	2.58083	0.427332	2.3401	0.811518	0.00905802	0.00947393
3556100	1	2650300	2488800	2316100	2622600	3066300	4050300	3240500	3439200	8384000	4709200	2037300	1	1	1	3572300	3636200	2	J3KPP4;O95232;B4DJ96;H0YA81	J3KPP4;O95232;B4DJ96;H0YA81	Luc7-like protein 3	LUC7L3	4	1.97225	0.678148	2.90829	0.343844	0.0428283	0.0228938	0.423198
79513000	63083000	44027000	43611000	85201000	146060000	265890000	330100000	433780000	553240000	881310000	945410000	341620000	410800000	559120000	681580000	570770000	620790000	6	P10599;P10599-2	P10599;P10599-2	Thioredoxin	TXN	2	7.38844	6.90079	1.07067	0.933998	0.00187829	0.775177	8.92489e-06
9838900	10274000	6919100	1	14211000	14075000	22135000	24427000	21111000	18652000	11772000	10911000	46871000	35437000	25386000	15180000	26871000	23485000	2	P10606	P10606	Cytochrome c oxidase subunit 5B, mitochondrial	COX5B	1	1.97057	3.13153	0.629267	1.58915	0.0175237	0.0589532	0.00269995
212340000	221740000	232610000	225870000	134080000	140040000	84213000	107890000	123450000	97794000	100000000	142930000	97835000	66479000	126880000	124770000	101150000	100420000	11	P10644;K7ER48;K7EPB2;K7EM13;P31321;C9JSK5;H7BYW5;K7EK41;K7EJ40;K7ENR3;K7EID3;K7EIE5;K7EKR1;K7EMZ6;K7EMU2;K7EQK3;K7EPR5	P10644;K7ER48;K7EPB2;K7EM13	cAMP-dependent protein kinase type I-alpha regulatory subunit	PRKAR1A	17	0.562517	0.529309	1.06274	0.940965	0.00182263	0.613247	0.00118127
10985000	8989100	5017800	4758800	21427000	18335000	12055000	22669000	1	1	1	1	51200000	28722000	19309000	17489000	18621000	18083000	3	P10768;H7BZT7;U3KQT1	P10768	S-formylglutathione hydrolase	ESD	3	0.499535	2.20714	0.226327	4.41838	0.256879	0.0141219	0.0447033
822480000	745850000	357390000	300680000	1499600000	1648300000	1741100000	1586900000	1391000000	1316900000	805260000	774850000	2915300000	2984800000	1900400000	2021800000	2079900000	1923900000	39	P10809;E7ESH4;E7EXB4;B7Z712;C9JL25;C9JCQ4;C9JL19	P10809	60 kDa heat shock protein, mitochondrial	HSPD1	7	1.41712	2.57263	0.550843	1.8154	0.216224	0.00279422	0.00106058
277140000	250400000	287270000	281650000	230090000	211030000	522880000	520520000	538130000	536660000	762500000	727910000	361090000	298470000	510950000	526680000	578630000	567590000	17	Q9Y383;Q96HJ9-2;Q9Y383-2;Q9Y383-3;F8WEU3;B8ZZ12	Q9Y383;Q96HJ9-2;Q9Y383-2;Q9Y383-3	Putative RNA-binding protein Luc7-like 2	LUC7L2	6	2.34693	1.84928	1.26911	0.787954	2.7012e-05	0.0817052	0.0012624
1604000000	1521200000	1240100000	1119100000	1164300000	1032900000	1978600000	2068700000	2995200000	2916100000	7156200000	5757600000	1185400000	1102600000	1873600000	1975700000	1941700000	1941400000	1	H0YLP2;Q2KHR2;C9JU50;Q2KHR2-2;H0YLX2	H0YLP2;Q2KHR2;C9JU50;Q2KHR2-2;H0YLX2	DNA-binding protein RFX7	RFX7	5	2.97756	1.30447	2.28258	0.4381	0.0162463	0.0366185	0.0696008
2853800	2693900	2913200	3857100	4800400	3278800	3547700	3154100	1	1	1	1	1	1	1	3217200	1	3496800	2	P11171;P11171-2;P11171-5;P11171-3;P11171-4;P11171-6;E9PEW9	P11171;P11171-2;P11171-5;P11171-3;P11171-4;P11171-6;E9PEW9	Protein 4.1	EPB41	7	0.328565	0.329163	0.998183	1.00182	0.0151667	0.998421	0.0152683
32189000	33800000	22555000	26093000	37974000	31060000	38082000	38341000	48174000	37730000	26633000	27515000	46560000	45618000	49824000	53488000	40426000	38382000	6	P11177;P11177-2;P11177-3;C9J634;F8WF02	P11177;P11177-2;P11177-3;C9J634	Pyruvate dehydrogenase E1 component subunit beta, mitochondrial	PDHB	5	1.1786	1.49342	0.789196	1.26711	0.198623	0.0368044	0.000864216
1	1	1	1	1	1	11038000	1	1	1	1	1	1	1	1	1	1	1	2	P11182;Q5VVL7	P11182;Q5VVL7	Lipoamide acyltransferase component of branched-chain alpha-keto acid dehydrogenase complex, mitochondrial	DBT	2	1.83967e+06	1	1.83967e+06	5.43576e-07	0.340893	0.340893	#DIV/0!
2255400	1904200	1	978310	3391500	3182300	20953000	35631000	22238000	20354000	20493000	12751000	24225000	21148000	29044000	26183000	33561000	33405000	4	Q5HY81;P11441;F8WB70;F8WCT8	Q5HY81;P11441	Ubiquitin-like protein 4A	UBL4A	4	11.3066	14.3076	0.790256	1.26541	6.74865e-05	0.141148	2.34319e-07
779870000	814100000	947610000	936980000	908700000	806010000	729350000	741370000	709020000	687110000	641290000	722750000	881110000	834140000	661930000	652090000	650480000	622850000	28	P11940;P11940-2;E7EQV3;E7ERJ7;H0YAR2;Q9H361;H0YBN4;H0YAP2;Q4VXU2;E5RJB9;Q4VY17;E5RH24;E5RGH3;H0YB86;H0YEQ8;E5RHG7;Q96DU9;Q96DU9-2;H0YAW6;H0YB75;H0YAS6;H0YAS7;E5RFD8;E5RGC4;H0YC10;Q5JQF8;E5RJM8	P11940;P11940-2;E7EQV3;E7ERJ7;H0YAR2	Polyadenylate-binding protein 1	PABPC1	27	0.814687	0.828495	0.983333	1.01695	0.000751884	0.806612	0.0210366
10314000	13629000	1	1	18826000	29938000	19619000	21989000	1	1	1	1	42415000	27884000	29820000	41991000	30565000	27402000	2	P51858-3;P51858;P51858-2;A8K8G0	P51858-3;P51858;P51858-2;A8K8G0	Hepatoma-derived growth factor	HDGF	4	0.57227	2.75183	0.20796	4.80862	0.439174	0.000502885	0.00312459
46520000	78096000	150110000	145150000	141750000	92667000	137340000	124400000	237750000	275780000	308960000	425630000	254690000	301210000	326040000	196740000	234930000	221450000	19	P12236;P12235;I7HJJ0;Q9H0C2	P12236;P12235	ADP/ATP translocase 3;ADP/ATP translocase 1	SLC25A6;SLC25A4	4	2.30762	2.34614	0.983584	1.01669	0.01597	0.935011	0.000258259
85510000	96785000	96486000	92809000	72170000	78263000	134300000	129950000	137860000	108940000	147000000	91818000	139810000	136260000	116220000	120580000	92342000	101230000	13	P12270	P12270	Nucleoprotein TPR	TPR	1	1.43647	1.35328	1.06147	0.942088	0.00232308	0.538665	0.00545793
61513000	57983000	11537000	24602000	318830000	267080000	186280000	193980000	79475000	94897000	37145000	42698000	374730000	422960000	255010000	197850000	281650000	282390000	10	P61604;B8ZZL8;B8ZZ54;S4R3N1	P61604;B8ZZL8;B8ZZ54	10 kDa heat shock protein, mitochondrial	HSPE1	4	0.855612	2.44704	0.349652	2.85999	0.777155	0.00115858	0.0190187
210940000	239090000	184470000	171860000	264580000	278880000	264310000	239010000	233610000	248380000	241810000	163790000	342640000	351280000	281500000	281890000	294530000	285120000	16	P12956;B1AHC9;B1AHC8;F5H1I8	P12956;B1AHC9;B1AHC8;F5H1I8	X-ray repair cross-complementing protein 6	XRCC6	4	1.03044	1.36089	0.75718	1.32069	0.768971	0.00327442	0.00413361
157190000	163450000	142750000	136870000	184850000	200890000	289260000	306800000	275180000	289130000	292400000	296230000	335370000	353610000	389150000	355610000	403350000	362840000	22	P13010;C9JZ81;H7C0H9	P13010	X-ray repair cross-complementing protein 5	XRCC5	3	1.77383	2.23117	0.795025	1.25782	3.80164e-07	4.78259e-05	6.27992e-08
1331400000	1180900000	900900000	814080000	2193900000	2242000000	2906800000	2951400000	2640700000	2617100000	2090300000	2179900000	4987600000	4739100000	3076800000	3170300000	3628600000	3403000000	43	P13639;Q15477;F5H7B0	P13639	Elongation factor 2	EEF2	3	1.77605	2.65554	0.668808	1.4952	0.00353838	0.00611858	0.00021166
483930	452210	427070	1	1	1398900	1917700	1632100	283880000	821730000	1142700	2641500	1805700	2257100	1884200	5615300	2035100	7026200	15	P13646;CON__ENSEMBL:ENSP00000377550;P13646-3;K7ERE3;P13646-2;K7EMD9;CON__P35900;P35900	P13646;CON__ENSEMBL:ENSP00000377550;P13646-3;K7ERE3;P13646-2;K7EMD9	Keratin, type I cytoskeletal 13	KRT13	8	402.932	7.46661	53.9646		0.230078	0.235335	0.0166807
14857000	18508000	7908200	5234400	39428000	29167000	26976000	25243000	13324000	13731000	1	1	45423000	48807000	24064000	22724000	28507000	25168000	7	P13667	P13667	Protein disulfide-isomerase A4	PDIA4	1	0.688725	1.69147	0.407174	2.45595	0.423174	0.0168267	0.0919486
96327000	106650000	45173000	58358000	158320000	156350000	175670000	177290000	134460000	112540000	49195000	39375000	551680000	510360000	441060000	448540000	290510000	299830000	7	Q01105;Q01105-2;Q01105-4;Q01105-3	Q01105;Q01105-2;Q01105-4;Q01105-3	Protein SET	SET	4	1.10843	4.09219	0.270864	3.69189	0.726895	0.000109463	5.596e-05
58739000	52154000	29198000	27137000	159740000	167540000	162680000	180550000	130660000	128980000	85584000	69137000	280160000	228170000	248140000	195380000	208080000	250560000	12	P13797;B4DGB4;F8W8D8;B7Z6M1;U3KQI3;H7C4N2;P13796;Q5TBN3;B4DI60;U3KQL8;Q14651;C9JAM8;F2Z2Z9	P13797;B4DGB4;F8W8D8;B7Z6M1;U3KQI3	Plastin-3	PLS3	13	1.53201	2.85231	0.537112	1.86181	0.194387	0.000510498	0.000374353
10364000	10100000	18209000	19026000	13298000	11185000	14234000	14151000	1	1	1	1	1	7686600	1	1	1	13332000	3	P13861;Q9BUB1;H7C1L0;C9J830;H7C4A9	P13861;Q9BUB1	cAMP-dependent protein kinase type II-alpha regulatory subunit	PRKAR2A	5	0.345392	0.255757	1.35047	0.740483	0.0250269	0.75289	0.0049645
12212000	11516000	14662000	11405000	11743000	13711000	13342000	24192000	18548000	11492000	1	1	9926900	12764000	18020000	15904000	14732000	16773000	4	P13984	P13984	General transcription factor IIF subunit 2	GTF2F2	1	0.898005	1.17104	0.766842	1.30405	0.75747	0.430664	0.135139
67341000	82026000	42563000	14760000	220910000	278460000	124860000	153770000	80524000	91202000	38549000	26325000	178650000	230730000	157240000	146940000	114670000	78494000	2	P14174	P14174	Macrophage migration inhibitory factor	MIF	1	0.729726	1.2842	0.568232	1.75984	0.520784	0.0499982	0.505365
28588000	23819000	15047000	17771000	65148000	63051000	57047000	46430000	45392000	47118000	12856000	1	200520000	143180000	74855000	62260000	84483000	78403000	15	F5H2F4;P11586;G3V3L6	F5H2F4;P11586;G3V3L6	C-1-tetrahydrofolate synthase, cytoplasmic;Methylenetetrahydrofolate dehydrogenase;Methenyltetrahydrofolate cyclohydrolase;Formyltetrahydrofolate synthetase	MTHFD1	3	0.978536	3.01607	0.324441	3.08222	0.954642	0.0123666	0.0129999
25848000	1	20930000	7821200	13786000	12187000	1	1	1	1	1	1	1	1316100	1	1890600	2052500	1	1	P14373;P14373-2	P14373;P14373-2	Zinc finger protein RFP	TRIM27	2	7.44674e-08	0.0652732	1.14086e-06	876534	0.0050771	0.0554704	0.00774918
549770000	597610000	328260000	341120000	1250200000	1313700000	1131000000	1038000000	863310000	1043700000	634900000	689950000	2378600000	2319100000	1388300000	1324200000	1677900000	1603900000	32	P14618;P14618-2;H3BTN5;P14618-3;H3BQ34;Q504U3;H3BTJ2;H3BUW1;H3BT25;H3BU13;P30613;P30613-2;H3BQZ3;H3BN34	P14618;P14618-2;H3BTN5;P14618-3;H3BQ34	Pyruvate kinase isozymes M1/M2;Pyruvate kinase	PKM2	14	1.23289	2.44073	0.505131	1.97968	0.411857	0.00155548	0.00233017
837700	1088200	1	1	1403200	1389100	1312800	1279100	1331100	1401300	905290	858430	3034900	3137200	2110300	1667600	2599100	2135600	1	P61011;P61011-2;G3V4F7	P61011;P61011-2;G3V4F7	Signal recognition particle 54 kDa protein	SRP54	3	1.50227	3.11235	0.482681	2.07176	0.188734	0.00055545	0.000833566
984700000	1030000000	892230000	1202500000	531430000	508840000	703310000	520650000	550710000	452530000	432190000	542210000	314130000	360850000	326780000	438020000	400810000	425900000	7	P14678-3;P14678;P14678-2;B3KVR1;P63162;J3QLE5;S4R3P3;J3KRY3;A8MT02	P14678-3;P14678;P14678-2;B3KVR1;P63162;J3QLE5	Small nuclear ribonucleoprotein-associated proteins B and B;Small nuclear ribonucleoprotein-associated protein;Small nuclear ribonucleoprotein-associated protein N	SNRPB;SNRPN	9	0.621706	0.440121	1.41258	0.707924	0.0230828	0.00576062	0.00206627
300730000	376730000	384370000	385240000	208850000	210340000	193450000	224370000	231170000	238350000	221280000	267090000	159890000	170350000	166850000	170150000	182400000	183140000	13	P14866;M0QXS5;P14866-2;M0QYT0;M0R1W6;M0QYL7;B4DVF8;M0R076	P14866;M0QXS5;P14866-2	Heterogeneous nuclear ribonucleoprotein L	HNRNPL	8	0.737148	0.553396	1.33205	0.750725	0.0462443	0.000280658	0.00254479
125650000	114660000	101330000	94803000	139530000	146930000	176200000	161420000	185220000	179160000	185820000	173510000	225460000	190710000	213510000	192010000	206210000	215520000	18	P14868;Q68CR9;H7BZ35;C9JLC1;H7C278;C9J7S3;C9JQM9	P14868;Q68CR9	Aspartate--tRNA ligase, cytoplasmic	DARS;DKFZp781B11202	7	1.46815	1.72004	0.853557	1.17157	0.000113822	0.00110599	6.60996e-06
18819000	7862400	6914500	6511500	22929000	22831000	38141000	32332000	33162000	20700000	1	28702000	62919000	43214000	38484000	32724000	42633000	37670000	4	P15170-3;P15170-2;Q8IYD1;H3BR35;H3BSV8	P15170-3;P15170-2;Q8IYD1;H3BR35	Eukaryotic peptide chain release factor GTP-binding subunit ERF3B	GSPT2;GSPT1	5	1.78225	3.00049	0.593986	1.68354	0.116443	0.0333567	0.000347929
1	1	1	1	1	1	33602000	35740000	34731000	35914000	33195000	31128000	18643000	1	22472000	21685000	17717000	20658000	7	Q969T4;R4GND1;R4GN77;R4GNG6;R4GMM6	Q969T4;R4GND1;R4GN77	Ubiquitin-conjugating enzyme E2 E3	UBE2E3	5	3.40517e+07	1.68625e+07	2.01937	0.495203	5.38248e-13	0.000650941	0.000636584
2566000000	2425700000	2722200000	2894500000	2484100000	2296000000	1419400000	1444400000	1442500000	1552600000	1873000000	1873800000	1159200000	1080600000	1683700000	1580400000	1438500000	1483900000	20	P15880;H0YEN5;E9PQD7;E9PMM9;E9PM36;E9PPT0;I3L404;H0YE27;H3BNG3	P15880;H0YEN5;E9PQD7;E9PMM9;E9PM36;E9PPT0;I3L404	40S ribosomal protein S2	RPS2	9	0.624213	0.547571	1.13997	0.877219	1.56777e-05	0.164369	4.69986e-06
7939500	9913100	8020500	10059000	7825500	8183600	11147000	11847000	18550000	10425000	14189000	1	13526000	16575000	8912800	10399000	9927700	1	4	P15924;P15924-2	P15924;P15924-2	Desmoplakin	DSP	2	1.27371	1.14246	1.11489	0.896951	0.37413	0.744917	0.607561
9831800	9573300	4249100	3426800	19472000	22242000	77793000	70102000	43283000	50315000	29109000	37511000	79320000	62434000	56983000	37069000	55517000	65954000	5	P16152;A8MTM1;E9PQ63;B4DFK7	P16152;A8MTM1;E9PQ63;B4DFK7	Carbonyl reductase [NADPH] 1	CBR1	4	4.47871	5.19336	0.862392	1.15956	0.00076843	0.413894	2.3558e-05
46327000	54944000	18480000	15140000	4379900	4426400	23000000	17212000	11849000	13483000	20407000	21789000	8665200	9278000	8985300	8594200	18641000	18958000	13	P16403	P16403	Histone H1.2	HIST1H1C	1	0.749771	0.508859	1.47343	0.678687	0.521145	0.0664762	0.223507
29440000	22857000	18692000	28208000	1	1	1	1	1	10099000	1	1	14592000	10815000	8909700	1	1	1	4	P16989;P16989-3;H0YG22	P16989;P16989-3	DNA-binding protein A	CSDA	3	0.101808	0.345945	0.294288	3.39803	0.0265287	0.229212	0.105439
529970000	492450000	446460000	469130000	465170000	521890000	1966100000	2351900000	2143800000	1426500000	2811100000	1946500000	1412200000	1397600000	2484100000	2445900000	3047300000	2928100000	14	P17066;P48741	P17066	Heat shock 70 kDa protein 6	HSPA6	2	4.32328	4.68885	0.922035	1.08456	6.38927e-06	0.621676	0.000117051
37870000	32281000	26196000	22496000	41780000	25482000	22306000	18197000	22316000	28192000	1	26300000	17243000	10547000	22686000	27213000	22185000	22951000	3	P17612;K7ENJ5	P17612;K7ENJ5	cAMP-dependent protein kinase catalytic subunit alpha	PRKACA	2	0.630348	0.659977	0.955107	1.047	0.0519108	0.851646	0.0224828
816090000	820670000	775050000	736030000	1155400000	1078100000	1865700000	1996200000	1924200000	1986100000	1976500000	2023200000	3155000000	3070400000	3417200000	3199300000	3911500000	3898900000	42	P11021;REV__Q9NXD2;REV__Q9NXD2-2;REV__H3BUZ0;REV__B4DLB6	P11021	78 kDa glucose-regulated protein	HSPA5	5	2.18754	3.83776	0.570004	1.75437	5.9728e-08	2.4974e-06	3.4609e-08
1440900000	1528400000	1565700000	1670200000	1202800000	1322100000	1700400000	1628200000	1568700000	1449800000	1347900000	1392400000	1377300000	1338500000	1611300000	1465100000	1506600000	1414100000	29	P17987;E7ERF2;E7EQR6;F5H282;F5GZ03;F5H136;F5H676;F5GZI8;F5H726;F5GYL4;F5H7Y1	P17987;E7ERF2;E7EQR6;F5H282	T-complex protein 1 subunit alpha	TCP1	11	1.04093	0.99803	1.04298	0.958789	0.522881	0.3915	0.972254
325250000	311010000	284980000	271750000	242020000	291710000	244060000	329080000	347180000	326850000	496450000	365860000	392120000	259870000	311530000	348110000	303820000	422550000	8	P18077;C9K025;F8WB72;F8WBS5	P18077;C9K025;F8WB72;F8WBS5	60S ribosomal protein L35a	RPL35A	4	1.22167	1.18027	1.03507	0.966115	0.104136	0.780656	0.0871502
1176100000	1282600000	1260000000	1180700000	1158400000	1105200000	1282500000	1313300000	1246100000	1168600000	1438500000	1327600000	1173600000	1103600000	1143200000	1130700000	1176400000	1160900000	23	P18124;A8MUD9;C9JIJ5;C9JZ88;Q9Y4A5;F2Z2U4;Q9Y4A5-2;H0Y4W2	P18124;A8MUD9	60S ribosomal protein L7	RPL7	8	1.08566	0.961664	1.12894	0.885786	0.0487545	0.00322965	0.149515
121490000	120580000	35843000	44549000	280520000	299790000	348200000	305040000	160010000	135710000	20898000	46090000	468310000	585070000	341350000	386380000	297100000	225830000	6	P07737;K7EJ44;I3L3D5	P07737;K7EJ44;I3L3D5	Profilin-1	PFN1	3	1.12536	2.55218	0.440942	2.26787	0.797783	0.0173879	0.00757029
808690000	809260000	589400000	604620000	869830000	990030000	946910000	967910000	840440000	794040000	605800000	546150000	1592100000	1681200000	1375600000	1472000000	1147600000	1158700000	34	P19338;H7BY16;C9JWL1;C9J1H7;C9JLB1;C9JYW2	P19338;H7BY16	Nucleolin	NCL	6	1.0063	1.80383	0.557866	1.79254	0.960012	0.000297944	0.000204337
3816300	3406700	2370500	2939700	1510500	1	3993700	3518800	1	1	1	1	3969300	4020700	4477400	1	4551000	4819700	2	P19388	P19388	DNA-directed RNA polymerases I, II, and III subunit RPABC1	POLR2E	1	0.534938	1.55501	0.344009	2.9069	0.292313	0.052487	0.195193
12379000	1	1	1	1	6182300	159750000	140630000	217420000	222940000	290400000	326590000	66940000	115080000	189610000	204380000	239160000	155580000	9	P29372-2;P29372-4;P29372;P29372-5;A2IDA3	P29372-2;P29372-4;P29372;P29372-5;A2IDA3	DNA-3-methyladenine glycosylase	MPG	5	73.1484	52.2997	1.39864	0.71498	1.92929e-05	0.129874	0.000107202
197860000	176530000	173180000	147780000	128870000	138400000	135840000	135170000	127840000	116160000	136710000	144370000	109490000	95750000	104930000	116310000	119320000	120360000	10	P20042	P20042	Eukaryotic translation initiation factor 2 subunit 2	EIF2S2	1	0.827003	0.692028	1.19504	0.83679	0.0357487	0.00293268	0.00150838
10261000	9894500	10428000	8141900	44600000	95586000	32877000	21617000	10029000	18049000	16275000	16564000	94459000	66902000	38242000	16468000	29271000	33948000	8	P20290;P20290-2;D6RDG3;H0Y9Y1;Q96K17;E9PL10;Q96K17-3;E9PPC3	P20290;P20290-2;D6RDG3	Transcription factor BTF3	BTF3	8	0.645073	1.56105	0.41323	2.41996	0.487391	0.0484678	0.38804
1153700000	1193700000	1284600000	1275300000	896660000	974120000	753730000	780680000	815180000	859770000	962910000	999680000	529830000	548530000	690830000	718630000	695350000	751220000	61	P21333;P21333-2;Q5HY54;E9PHF0;F8WE98;Q14315;Q14315-2;H0Y5C6;H0Y5F3;H7C5L4;H7C2E7	P21333;P21333-2;Q5HY54	Filamin-A	FLNA	11	0.763041	0.580458	1.31455	0.760717	0.00597371	0.00406317	9.30168e-05
22509000	19035000	18377000	11825000	49147000	23019000	32789000	21863000	1	23243000	1	1	74558000	75394000	18943000	18470000	36087000	34879000	5	P21796;C9JI87	P21796;C9JI87	Voltage-dependent anion-selective channel protein 1	VDAC1	2	0.541268	1.79506	0.301532	3.3164	0.199275	0.032704	0.137245
8490300	5736400	6337100	6034500	11427000	10060000	56029000	95967000	73892000	51877000	113570000	110730000	81661000	58409000	84536000	21379000	80142000	86494000	6	P21912	P21912	Succinate dehydrogenase [ubiquinone] iron-sulfur subunit, mitochondrial	SDHB	1	10.4411	8.58102	1.21677	0.821848	4.53882e-05	0.34745	0.000162323
79414000	94772000	52392000	68235000	131600000	127840000	179040000	172640000	174190000	150320000	128600000	121750000	274630000	309360000	228770000	212880000	259150000	243820000	18	P22102;P22102-2;B4DJ93;F8WD69;C9JTV6;C9JBJ1;C9JKQ7;C9JZG2;H7C366	P22102;P22102-2	Trifunctional purine biosynthetic protein adenosine-3;Phosphoribosylamine--glycine ligase;Phosphoribosylformylglycinamidine cyclo-ligase;Phosphoribosylglycinamide formyltransferase	GART	9	1.67169	2.75796	0.606132	1.6498	0.00380951	0.000176366	7.31417e-06
1	1	1	1	6700300	1	5700800	1	1	6140100	4962100	5786800	8325200	6598000	7838000	7293300	7433400	7978600	20	P04350;M0R278;M0R1I1	P04350	Tubulin beta-4A chain	TUBB4A	3	3.37146	6.78574	0.496845	2.0127	0.137394	0.0110723	0.000213079
89392000	88864000	37962000	38198000	292400000	304630000	234890000	240660000	131800000	119960000	100130000	87471000	397410000	361260000	242420000	218410000	261290000	266350000	7	Q32Q12;P22392-2;P22392;J3KPD9;E7ERL0;O60361;E5RHP0;F6XY72;C9K028	Q32Q12;P22392-2;P22392;J3KPD9;E7ERL0	Nucleoside diphosphate kinase;Nucleoside diphosphate kinase B	NME1-NME2;NME2;NME1	9	1.07454	2.05197	0.523662	1.90963	0.857788	0.0061915	0.0281437
747400000	684900000	217790000	238630000	215370000	191560000	301830000	305400000	228280000	188690000	222550000	243970000	310800000	306180000	205410000	215240000	309310000	341360000	16	P22626;P22626-2	P22626;P22626-2	Heterogeneous nuclear ribonucleoproteins A2/B1	HNRNPA2B1	2	0.649367	0.735434	0.882971	1.13254	0.24104	0.296088	0.372599
204040000	166920000	78776000	92810000	303250000	329540000	491550000	503310000	439580000	445440000	410210000	402190000	771030000	737920000	624300000	576860000	628300000	649760000	25	P38646;D6RJI2;D6RA73;H0YBG6;H0Y8S0	P38646	Stress-70 protein, mitochondrial	HSPA9	5	2.29065	3.39322	0.675067	1.48134	0.000258623	9.82653e-05	4.32377e-06
1096200000	1154500000	1049200000	1080100000	885110000	893160000	947440000	944280000	1004100000	986750000	1015200000	1072700000	754790000	755280000	849930000	809900000	818340000	812800000	29	P23246;P23246-2;H0Y9K7;H0Y9U2	P23246;P23246-2	Splicing factor, proline- and glutamine-rich	SFPQ	4	0.969504	0.779609	1.24358	0.804131	0.542234	1.41289e-05	0.000843492
8203200	10186000	15736000	1	29517000	32615000	14860000	12725000	7633600	10198000	9676400	7771700	36324000	40542000	13333000	9793400	12673000	8662300	5	P23284	P23284	Peptidyl-prolyl cis-trans isomerase B	PPIB	1	0.653091	1.26045	0.51814	1.92998	0.320327	0.132106	0.604194
126710000	136730000	156880000	127720000	97272000	126120000	73166000	82602000	82498000	81788000	97192000	89022000	87150000	82733000	76323000	80405000	109250000	106210000	6	P23381;P23381-2;G3V3Y5;G3V3H8;G3V277;H0YJP3;G3V2Y7;G3V456;G3V5U1;G3V227;G3V3P2;G3V423;G3V3X0;G3V3S7;G3V5W1	P23381;P23381-2;G3V3Y5;G3V3H8	Tryptophan--tRNA ligase, cytoplasmic;T1-TrpRS;T2-TrpRS	WARS	15	0.65627	0.702682	0.933951	1.07072	0.000412358	0.385571	0.00279516
4182200000	4252900000	5424000000	5159800000	4075800000	3720500000	2209800000	2073900000	2220500000	2331300000	2273600000	2396500000	1901300000	1802400000	2118900000	2106800000	2104400000	2039000000	29	P23396;P23396-2;E9PL09;E9PPU1;F2Z2S8;H0YCJ7;H0YEU2;E9PK82;H0YF32;E9PJH4;E9PQ96;E9PSF4;E9PQX2;H0YES8;E9PJN9	P23396;P23396-2;E9PL09;E9PPU1;F2Z2S8;H0YCJ7;H0YEU2	40S ribosomal protein S3	RPS3	15	0.503655	0.450222	1.11868	0.893911	1.15217e-05	0.00677097	4.87256e-06
264040000	239360000	416600000	374640000	198020000	183440000	153510000	163990000	152200000	143100000	150060000	219540000	68243000	62296000	87053000	87717000	116500000	84652000	19	P23458;P29597;O60674;E9PM19;F5H5U8;K7EJR6	P23458	Tyrosine-protein kinase JAK1	JAK1	6	0.586123	0.302166	1.93973	0.515534	0.0173854	0.000192077	0.000617422
85012000	88179000	51631000	45521000	162680000	173740000	137780000	140820000	108580000	98691000	89690000	88561000	258800000	265760000	139340000	123670000	177950000	178430000	13	P23526;P23526-2	P23526;P23526-2	Adenosylhomocysteinase	AHCY	2	1.09453	1.88533	0.580552	1.7225	0.702566	0.011962	0.0219372
464960000	420410000	300470000	427260000	645730000	724150000	607990000	572150000	581290000	576520000	414260000	413750000	960950000	1014900000	821510000	785460000	796940000	738160000	13	E9PK25;P23528;E9PP50;G3V1A4;E9PQB7;E9PS23;E9PLJ3	E9PK25;P23528;E9PP50;G3V1A4;E9PQB7	Cofilin-1	CFL1	7	1.06134	1.71571	0.618603	1.61655	0.688368	0.000210926	0.0010659
7540300	4048900	12078000	9210300	13758000	20015000	28236000	21815000	18709000	20836000	27096000	18986000	25986000	22948000	36124000	22092000	23756000	34642000	6	P23921;E9PD78;E9PL69;F5H861	P23921;E9PD78;E9PL69;F5H861	Ribonucleoside-diphosphate reductase large subunit;Ribonucleoside-diphosphate reductase	RRM1	4	2.03566	2.48382	0.819569	1.22015	0.00217919	0.131464	0.00066134
326250000	286010000	273030000	222550000	308460000	282550000	233450000	227810000	210560000	239560000	171140000	214990000	273060000	294600000	317490000	293960000	254920000	292790000	14	P24534;C9JZW3;F2Z2G2;F8WF65	P24534	Elongation factor 1-beta	EEF1B2	4	0.763758	1.01646	0.751387	1.33087	0.00351815	0.000315545	0.788315
94095000	120420000	32283000	29199000	281230000	215230000	241570000	224900000	168510000	150860000	72269000	61375000	652510000	601940000	297880000	321460000	389240000	438450000	12	P18669;P15259;Q8N0Y7	P18669;P15259	Phosphoglycerate mutase 1;Phosphoglycerate mutase 2	PGAM1;PGAM2	3	1.19034	3.49726	0.340363	2.93804	0.644058	0.00130409	0.00129616
5607500	1	1	1	4181100	5086400	5477900	5606300	5440000	5800900	1	6428800	21043000	19259000	8903700	6927000	5484100	7277100	4	P24752;G3XAB4;E9PRQ6	P24752	Acetyl-CoA acetyltransferase, mitochondrial	ACAT1	3	1.93303	4.63152	0.417365	2.39598	0.150302	0.0467745	0.0134294
907580000	1023500000	1485100000	1157600000	896960000	867790000	669420000	596230000	762620000	950740000	679180000	832180000	744640000	692260000	716850000	587670000	658980000	702830000	7	P25398	P25398	40S ribosomal protein S12	RPS12	1	0.708425	0.647347	1.09435	0.913784	0.018489	0.283965	0.00367605
4182900	4374100	2410100	2428000	4769000	11834000	4250300	6060100	8374700	4174400	4568400	5815300	38995000	38494000	11004000	7870100	12710000	27914000	3	P19623;K7EL89;K7ESL0	P19623;K7EL89	Spermidine synthase	SRM	3	1.10818	4.56653	0.242674	4.12076	0.737691	0.0138586	0.0133387
6073000	4399100	2492900	2762100	9356800	9227800	6891300	7701900	6045500	5450600	6755900	7428400	12810000	11143000	8710900	8501400	8050800	7114800	2	P25787	P25787	Proteasome subunit alpha type-2	PSMA2	1	1.17376	1.64174	0.714947	1.39871	0.459836	0.0174093	0.0366718
4899000	5808300	4233600	3887200	8808800	8875900	6486800	10191000	6569700	5236800	6369500	6797400	9816500	9256300	9834000	9253000	8774600	7825400	2	P25788;P25788-2	P25788;P25788-2	Proteasome subunit alpha type-3	PSMA3	2	1.14073	1.49974	0.760616	1.31472	0.470487	0.0157356	0.0101485
198060000	187600000	285750000	290480000	209630000	201510000	184100000	170960000	198900000	176280000	223610000	226630000	142120000	152420000	153460000	122010000	154220000	142180000	10	P25789;H0YN18;H0YL69;H0YMZ1;P25789-2;H0YMA1;H0YMI6;H0YKT8;H0YLC2;H0YLS6;H0YKS0;H0YMV3	P25789;H0YN18;H0YL69;H0YMZ1;P25789-2;H0YMA1	Proteasome subunit alpha type-4;Proteasome subunit alpha type	PSMA4	12	0.859763	0.63102	1.3625	0.733947	0.163584	0.000760528	0.00155639
40841000	40487000	16553000	17606000	97176000	99857000	74805000	74128000	60980000	49695000	11299000	7687800	185130000	165260000	105880000	102510000	115900000	131760000	9	Q02790;H0YFG2;F5H1U3	Q02790	Peptidyl-prolyl cis-trans isomerase FKBP4;Peptidyl-prolyl cis-trans isomerase FKBP4, N-terminally processed	FKBP4	3	0.891446	2.58044	0.345463	2.89467	0.779174	0.000765263	0.00253562
1175300000	1243500000	1381900000	1123500000	1063900000	1124500000	1016500000	1097700000	1006700000	1087600000	1070400000	1147300000	1080700000	1126200000	1135800000	1120600000	1029800000	1107700000	21	P26373;P26373-2;J3QSB4;J3KS98;H3BTH3;H3BUK8	P26373;P26373-2;J3QSB4	60S ribosomal protein L13	RPL13	6	0.903495	0.928043	0.973549	1.02717	0.0490745	0.304313	0.112588
15437000	16564000	9570100	9527000	18061000	16705000	41104000	38422000	29975000	23305000	1	26479000	92888000	77509000	31420000	9222700	137850000	21947000	7	P26583;D6R9A6	P26583;D6R9A6	High mobility group protein B2	HMGB2	2	1.85508	4.31888	0.429529	2.32813	0.0764813	0.12562	0.0412371
329640000	301710000	361600000	310350000	335900000	360370000	233080000	253460000	198610000	239460000	230230000	228270000	456760000	343310000	297510000	296740000	343500000	324040000	16	P26599-3;P26599-2;P26599;A6NLN1;K7EKJ7;K7ELW5;K7ES59;O95758-4;O95758-5;O95758;O95758-2;O95758-6;O95758-1;K7EK45;O95758-7;B4DSS8;Q9UKA9-3;Q9UKA9-4;Q9UKA9-2;Q9UKA9	P26599-3;P26599-2;P26599;A6NLN1	Polypyrimidine tract-binding protein 1	PTBP1	20	0.691704	1.03115	0.670807	1.49074	9.52115e-06	0.00118235	0.7002
7447000	1	5020400	1	1	7675700	8693700	9769300	1	10394000	7915500	1	13479000	12130000	10969000	14653000	10696000	11804000	2	Q08J23;Q08J23-2;Q08J23-3	Q08J23;Q08J23-2;Q08J23-3	tRNA (cytosine(34)-C(5))-methyltransferase	NSUN2	3	1.82556	3.66036	0.498739	2.00506	0.294507	0.0137275	0.000322018
25605000	22838000	23367000	25594000	18774000	25094000	27175000	30282000	29790000	26658000	23206000	27182000	35493000	31244000	28402000	31732000	28980000	26335000	7	P26640;B4DZ61;A2ABF4	P26640	Valine--tRNA ligase	VARS	3	1.16296	1.28961	0.901787	1.10891	0.0274546	0.103612	0.00232712
1043100000	1017000000	903260000	861850000	1053600000	1146200000	1027000000	1043000000	1082800000	942410000	927480000	837180000	1468200000	1517100000	1097300000	1150900000	1169200000	1188800000	18	P26641;B4DTG2	P26641;B4DTG2	Elongation factor 1-gamma	EEF1G	2	0.972591	1.26	0.771899	1.29551	0.637032	0.00558261	0.0116608
53620000	25807000	39539000	38331000	74874000	77159000	81545000	73373000	89087000	82044000	56211000	76126000	132630000	109680000	98995000	86260000	98349000	102910000	10	P27348;E9PG15	P27348;E9PG15	14-3-3 protein theta	YWHAQ	2	1.48187	2.03286	0.728958	1.37182	0.028303	0.00476444	0.000539791
592780000	604420000	592770000	559540000	586740000	584810000	474560000	551040000	578530000	571720000	547680000	588820000	495120000	487440000	562560000	532200000	502700000	527070000	18	P27635;F8W7C6;Q96L21;H7C2C5;H7C123;A6QRI9;B8A6G2;H7C2U2	P27635;F8W7C6;Q96L21;H7C2C5;H7C123	60S ribosomal protein L10;60S ribosomal protein L10-like	RPL10;RPL10L	8	0.940725	0.88243	1.06606	0.938032	0.0803906	0.123693	0.000349047
8049800	7897500	4986600	5312400	10244000	5572900	10407000	10804000	8803500	10452000	9170800	10007000	19101000	21938000	10386000	10764000	18675000	18405000	3	P27694;I3L4R8	P27694	Replication protein A 70 kDa DNA-binding subunit	RPA1	2	1.41797	2.36	0.600835	1.66435	0.00881633	0.00763368	0.00119292
12013000	12538000	5674300	6072600	40247000	40478000	20270000	26447000	16046000	15109000	4122100	20675000	92752000	90719000	28472000	23168000	35734000	55044000	5	P27797;K7EJB9	P27797;K7EJB9	Calreticulin	CALR	2	0.877342	2.78483	0.315043	3.17417	0.752222	0.0169059	0.035167
11494000	15408000	10677000	1	34954000	25249000	28255000	23893000	19107000	19636000	15071000	15064000	35540000	50817000	30800000	22423000	20086000	19321000	4	P28066;P28066-2	P28066;P28066-2	Proteasome subunit alpha type-5	PSMA5	2	1.23771	1.83047	0.676172	1.47891	0.491269	0.102554	0.0831697
9801300	13093000	9550100	9780200	12811000	27757000	1	1	1	1	1	1	17728000	15962000	1	1	1	1	2	P28070	P28070	Proteasome subunit beta type-4	PSMB4	1	7.24702e-08	0.40692	1.78094e-07	5.615e+06	0.000708591	0.14567	0.10356
23213000	16536000	5751800	8040900	26084000	28943000	21141000	32469000	18799000	19186000	19517000	19564000	29734000	29160000	26351000	29351000	25108000	18470000	3	P28072;I3L3X7	P28072	Proteasome subunit beta type-6	PSMB6	2	1.20362	1.4569	0.826153	1.21043	0.430652	0.130585	0.0836425
5705300	6530800	3121900	3284100	10041000	8459700	12389000	13930000	7909200	9393900	6079500	9858200	11710000	1	14970000	12422000	1	10808000	1	P28074;P28074-3	P28074;P28074-3	Proteasome subunit beta type-5	PSMB5	2	1.60354	1.34373	1.19334	0.837981	0.0445578	0.595729	0.482533
3561200000	3710800000	3546100000	3262500000	5168900000	4537900000	8919800000	8445400000	8777500000	7973900000	9689400000	9785200000	11072000000	10476000000	9185599000	8866300000	9902500000	10659000000	27	P68104;Q5VTE0;Q05639;Q5JR01;A6PW80	P68104;Q5VTE0	Elongation factor 1-alpha 1;Putative elongation factor 1-alpha-like 3	EEF1A1;EEF1A1P5	5	2.25292	2.52913	0.89079	1.1226	2.95947e-07	0.0373008	1.28778e-07
303200000	307340000	358140000	388730000	282780000	251680000	270570000	343740000	1	354930000	1	410790000	215740000	201170000	283890000	335770000	1	1	4	Q5VZU9;P29144	Q5VZU9;P29144	Tripeptidyl-peptidase 2	TPP2	2	0.729453	0.547908	1.33134	0.751121	0.298105	0.559641	0.0431834
24209000	17392000	17918000	14991000	43704000	39949000	51503000	67265000	53775000	53554000	50893000	51326000	101840000	91298000	81315000	67433000	89112000	92609000	13	P17812;B4DR64;B7Z9C4;Q9NRF8	P17812;B4DR64;B7Z9C4	CTP synthase 1	CTPS	4	2.07581	3.31055	0.627028	1.59483	0.000541704	0.000133722	5.43973e-06
13753000	17373000	5990000	3125100	80136000	77812000	39159000	43348000	17371000	16140000	10022000	8101000	78013000	48088000	32821000	46675000	21448000	22251000	7	P29401-2;P29401;B4E022;E9PFF2;F8W888;F8WAX4	P29401-2;P29401;B4E022	Transketolase	TKT	6	0.676833	1.25787	0.538079	1.85846	0.517847	0.101282	0.628118
6629200	1	1	1	1	1	8472600	12376000	11790000	7645600	1	1	23406000	31797000	10643000	10605000	12595000	1	1	P30040;P30040-2	P30040;P30040-2	Endoplasmic reticulum resident protein 29	ERP29	2	6.07678	13.4324	0.452398	2.21044	0.0492259	0.140608	0.0149839
148520000	149360000	134120000	131690000	214590000	198120000	270240000	266980000	223000000	218440000	157840000	164790000	583370000	530830000	365060000	359000000	403080000	330800000	13	P30041	P30041	Peroxiredoxin-6	PRDX6	1	1.33274	2.63431	0.505917	1.97661	0.0499105	0.00106331	0.000138146
2142800	3450100	1342900	881940	3579500	3359600	6174800000	5424900000	8277200000	6787400000	8275500000	6817900000	1886400000	2065900000	3858200000	5121500000	3039300000	4182900000	9	P51965;C9J2P0;H7C061;P51965-3	P51965;C9J2P0;H7C061	Ubiquitin-conjugating enzyme E2 E1	UBE2E1	4	2829.72	1365.75	2.07191	0.482646	3.58836e-08	0.000410012	6.81529e-05
25553000	21349000	9314900	8355100	19661000	24967000	27216000	26044000	16087000	13883000	9794500	10716000	50307000	30659000	16446000	24341000	19307000	20108000	1	P30049	P30049	ATP synthase subunit delta, mitochondrial	ATP5D	1	0.950005	1.4759	0.643679	1.55357	0.839579	0.139969	0.1775
576290000	562250000	646550000	596860000	644570000	621020000	370740000	353160000	395330000	396190000	474730000	472960000	375290000	435590000	438250000	376280000	372650000	383930000	10	P30050;P30050-2	P30050;P30050-2	60S ribosomal protein L12	RPL12	2	0.67528	0.65304	1.03406	0.967066	1.58189e-05	0.594965	6.70521e-07
6029200	3308200	1882700	1	4988600	5181300	5610800	4651700	1971800	4928400	1	1	21074000	20448000	2761000	5951800	6961100	5823700	2	P30084	P30084	Enoyl-CoA hydratase, mitochondrial	ECHS1	1	0.80237	2.94622	0.272339	3.67189	0.624873	0.0513329	0.0703468
9665000	2898600	7556600	7475300	3418800	3128300	5505600	6964900	6065400	5314900	9024500	6394800	8123200	3999700	4944000	5036900	6411900	6933300	2	P30085;Q5T0D2;P30085-2	P30085;Q5T0D2;P30085-2	UMP-CMP kinase	CMPK1	3	1.15018	1.03826	1.10779	0.902697	0.527591	0.461119	0.873762
25693000	41785000	13984000	15426000	66592000	36168000	46769000	49663000	50690000	46595000	1	24693000	43484000	55216000	41351000	31240000	37155000	48898000	5	P30086	P30086	Phosphatidylethanolamine-binding protein 1;Hippocampal cholinergic neurostimulating peptide	PEBP1	1	1.09398	1.28899	0.848708	1.17826	0.79186	0.485926	0.297685
247490000	229680000	195180000	229170000	243850000	222230000	316680000	294270000	304490000	287720000	294530000	260190000	348290000	401160000	242440000	253070000	315630000	314490000	14	P30153;F5H3X9;B3KQV6;C9J9C1;E9PH38;P30154-2;P30154;P30154-4;E9PNM7;P30154-3;P30154-5;E9PHZ6;E9PPI5	P30153;F5H3X9;B3KQV6;C9J9C1	Serine/threonine-protein phosphatase 2A 65 kDa regulatory subunit A alpha isoform	PPP2R1A	13	1.28538	1.37107	0.937496	1.06667	0.000135266	0.460126	0.00760396
1	1	5993900	1	1	1	28739000	20049000	1	15429000	1	8219600	23585000	50675000	33348000	39759000	33321000	36901000	5	CON__ENSEMBL:ENSBTAP00000018229	CON__ENSEMBL:ENSBTAP00000018229			1	12.085	36.3017	0.332906		0.089675	0.0101851	0.00028634
171740000	163680000	152800000	195160000	135520000	132310000	151630000	159210000	155690000	145020000	111550000	102120000	173410000	200990000	122290000	123830000	106650000	139650000	13	P31153;B4DN45;Q00266	P31153;B4DN45	S-adenosylmethionine synthase isoform type-2;S-adenosylmethionine synthase	MAT2A	3	0.867548	0.911281	0.952008	1.05041	0.161145	0.703315	0.440457
1	2335600	1	1	14821000	11971000	33857000	31448000	38281000	30799000	37712000	54137000	43290000	33730000	60901000	51596000	68070000	69721000	4	P30044;P30044-2;P30044-3;P30044-4	P30044;P30044-2;P30044-3;P30044-4	Peroxiredoxin-5, mitochondrial	PRDX5	4	7.767	11.237	0.691196	1.44677	2.44861e-05	0.033047	1.64091e-05
2736500	2390500	1	1	3063300	3612400	3160200	4372600	2306600	3152400	1	2304100	10476000	4351200	2995800	3690000	4653800	5778200	3	P31930	P31930	Cytochrome b-c1 complex subunit 1, mitochondrial	UQCRC1	1	1.29597	2.70658	0.47882	2.08847	0.522009	0.0507856	0.0249011
6222100	3817500	7153900	6742000	19333000	18779000	22394000	21965000	19904000	15887000	1	1	266840000	319960000	173970000	77446000	43058000	46974000	6	Q92688;Q92688-2;Q5T6W8	Q92688;Q92688-2;Q5T6W8	Acidic leucine-rich nuclear phosphoprotein 32 family member B	ANP32B	3	1.29175	14.9603	0.0863455	11.5814	0.571171	0.0156054	0.0138682
67705000	68553000	31519000	33458000	94800000	95999000	105960000	123380000	120060000	111920000	82424000	88968000	204660000	147920000	116380000	118740000	139170000	160890000	10	P31946-2	P31946-2			1	1.61392	2.2645	0.712706	1.4031	0.0133405	0.0173485	0.000849349
53774000	58461000	101500000	33866000	1	1	84681000	100960000	80671000	79370000	56186000	50745000	132060000	120620000	141080000	95490000	112600000	114550000	5	P31947;P31947-2	P31947;P31947-2	14-3-3 protein sigma	SFN	2	1.82799	2.89336	0.631788	1.58281	0.0810051	0.00139414	0.00104477
7897700	7327500	2975200	2780600	16586000	15307000	12291000	14368000	12304000	10585000	1	1	66873000	68255000	15221000	16656000	16202000	35401000	3	Q9UII2;Q9UII2-2;Q9UII2-3	Q9UII2;Q9UII2-2;Q9UII2-3	ATPase inhibitor, mitochondrial	ATPIF1	3	0.937096	4.13451	0.226652	4.41204	0.880547	0.0244895	0.0261556
33178000	108030000	115910000	124750000	122940000	120560000	213830000	191080000	194010000	208310000	252530000	220480000	229070000	202010000	251240000	220270000	270270000	273770000	14	P31689;P31689-2;B7Z5C0;C9JDE6	P31689;P31689-2;B7Z5C0	DnaJ homolog subfamily A member 1	DNAJA1	4	2.04718	2.31325	0.884981	1.12997	7.80844e-05	0.0912526	2.41409e-05
6328300	6157300	3911100	4722100	9549200	7943500	7276400	10579000	11097000	10398000	11616000	8904700	12722000	1	8739300	14212000	20455000	23475000	4	P33176;Q12840;O60282;J3KNA1;E9PET8;O60282-2	P33176;Q12840;O60282;J3KNA1;E9PET8;O60282-2	Kinesin-1 heavy chain;Kinesin heavy chain isoform 5A;Kinesin heavy chain isoform 5C	KIF5B;KIF5A;KIF5C	6	1.5506	2.06165	0.752118	1.32958	0.00782335	0.368923	0.0820906
9160700	8291900	5856300	5609000	11256000	11802000	12128000	13464000	10479000	11726000	8720700	7685500	24083000	18391000	14903000	13232000	18185000	14470000	3	P33991	P33991	DNA replication licensing factor MCM4	MCM4	1	1.23525	1.98677	0.621738	1.60839	0.17331	0.00544485	0.0013021
11092000	15932000	7824300	9396800	10217000	25022000	14083000	13870000	14523000	11571000	13047000	10733000	40824000	28275000	15543000	22302000	13696000	17123000	8	P33993;P33993-3;P33993-2;C9J8M6	P33993;P33993-3;P33993-2	DNA replication licensing factor MCM7	MCM7	4	0.979152	1.73321	0.564934	1.77012	0.919934	0.0394522	0.0766803
77170000	69490000	37354000	14734000	112990000	135910000	238830000	209370000	166620000	203290000	60124000	151270000	363270000	336240000	308640000	344020000	318490000	337580000	26	P34932	P34932	Heat shock 70 kDa protein 4	HSPA4	1	2.29981	4.4862	0.51264	1.95069	0.011963	0.000120502	1.41715e-07
99767000	92452000	42256000	44457000	158660000	128190000	174440000	157760000	153270000	176220000	81857000	128400000	333710000	333500000	277770000	233160000	197950000	201900000	16	P35232;C9JW96;E9PCW0;E7ESE2;C9JZ20;B4DY47;D6RBK0	P35232;C9JW96;E9PCW0;E7ESE2;C9JZ20;B4DY47	Prohibitin	PHB	7	1.54114	2.78904	0.552568	1.80973	0.0567758	0.00233906	0.0003126
37525000	41265000	30365000	33804000	52610000	48413000	77314000	71591000	89518000	96271000	97671000	84387000	107060000	89966000	93841000	73363000	94464000	103790000	10	P35520-2;P35520;F5H2U1;H7C2H4;C9JMA6;H7C2W0;H7C1W6	P35520-2;P35520;F5H2U1	Cystathionine beta-synthase	CBS	7	2.11799	2.30543	0.918696	1.0885	8.75909e-06	0.264662	4.71643e-06
4530400000	4440300000	2824300000	3057800000	1640000000	1427500000	2297100000	2487900000	4336000000	3956000000	2131300000	2388500000	2243200000	2405300000	2838900000	2651500000	4674900000	4640500000	39	P35527;CON__P35527;K7EQQ3	P35527;CON__P35527;K7EQQ3	Keratin, type I cytoskeletal 9	KRT9	3	0.981948	1.0856	0.90452		0.937992	0.678982	0.804147
255410000	257640000	227430000	233680000	368150000	322930000	272060000	255990000	281750000	249570000	238660000	211000000	347970000	349900000	306920000	311480000	325080000	350760000	46	P35579;P35579-2;G8JLL9;Q7Z406-2;F2Z2U8;Q7Z406-6;Q7Z406;Q5BKV1;B1AH99;Q7Z406-4;Q7Z406-5;REV__Q9UKV3;REV__Q9UKV3-5;REV__E7EQT4;REV__S4R3H4;M0QY43;REV__Q08AF3	P35579;P35579-2	Myosin-9	MYH9	17	0.906194	1.19629	0.757503	1.32013	0.322307	0.000112673	0.0483301
1	1	1	1	1	1	188200000	189790000	280370000	249810000	178680000	180350000	37461000	30886000	88133000	102690000	57303000	56805000	9	Q96LR5;C9J180;F8W8F0;F8WF15	Q96LR5;C9J180;F8W8F0;F8WF15	Ubiquitin-conjugating enzyme E2 E2	UBE2E2	4	211200000	62213000	3.39479	0.294569	2.89061e-07	3.31611e-05	0.000294433
11538000	8874000	10949000	10295000	7311100	6878400	1	1	1	1	1	1	1	1	1	1	1	1	4	P35813-3;P35813;P35813-2;E9PKB5;E9PJN3;E9PL75	P35813-3;P35813;P35813-2;E9PKB5;E9PJN3;E9PL75	Protein phosphatase 1A	PPM1A	6	1.07439e-07	1.07439e-07	1	1	3.46758e-07	#DIV/0!	3.46758e-07
1289900000	1411300000	992150000	963370000	581140000	551500000	723520000	817650000	2991800000	2901600000	1367900000	1345900000	2158600000	2081100000	1317000000	1249200000	1152500000	1173300000	40	P35908;CON__P35908;CON__Q7Z794;Q7Z794;H0YID6;CON__Q6IME9;CON__Q14CN4-1;Q14CN4;Q14CN4-2;Q14CN4-3;CON__REFSEQ:XP_932229;F8VS61;H0YHD9	P35908;CON__P35908	Keratin, type II cytoskeletal 2 epidermal	KRT2	13	1.75293	1.57732	1.11133		0.179654	0.770685	0.00158649
137180000	138920000	111750000	143830000	98879000	126470000	136350000	148960000	156770000	145760000	145040000	144170000	114650000	91588000	161440000	154260000	180280000	156580000	19	P35998;B7Z5E2;C9JLS9	P35998;B7Z5E2	26S protease regulatory subunit 7	PSMC2	3	1.15854	1.13443	1.02125	0.979189	0.0263165	0.829919	0.293997
923980000	1008800000	1191500000	1083400000	1130300000	1157600000	1127300000	1206100000	1249300000	1163600000	1061300000	1084200000	1167700000	1177300000	1222500000	1227700000	1098900000	1118300000	31	P36578;H3BM89;H3BTP7;H3BU31	P36578;H3BM89;H3BTP7	60S ribosomal protein L4	RPL4	4	1.061	1.07956	0.982802	1.0175	0.219564	0.592975	0.0922755
2967400	3773100	2729300	2621400	1	3289600	1	1	1	3054800	3094800	3040500	3744200	3793700	3995600	1	3762200	8015500	2	P36957;Q86SW4;B7Z5W8;G3V3F0;G3V5M3;H0YJF9	P36957;Q86SW4;B7Z5W8;G3V3F0;G3V5M3;H0YJF9	Dihydrolipoyllysine-residue succinyltransferase component of 2-oxoglutarate dehydrogenase complex, mitochondrial	DLST	6	0.597505	1.5156	0.394236	2.53655	0.264299	0.0873795	0.284416
9232600	9523400	5053100	3767200	19032000	14708000	47197000	46649000	25333000	46433000	48646000	29512000	87059000	51479000	67058000	65236000	71101000	69667000	6	Q9Y5A9;Q9Y5A9-2;S4R3V3;S4R3J8	Q9Y5A9;Q9Y5A9-2	YTH domain family protein 2	YTHDF2	4	3.97561	6.71273	0.59225	1.68848	9.09348e-05	0.00125148	5.81446e-07
49578000	44778000	61059000	22518000	49036000	67057000	29041000	27106000	25796000	27437000	36091000	28656000	32948000	40774000	47689000	45740000	35552000	37969000	6	P37108;H0YLA2;H0YLW0	P37108;H0YLA2	Signal recognition particle 14 kDa protein	SRP14	3	0.592216	0.81854	0.723503	1.38216	0.0115148	0.00259977	0.215581
24690000	30818000	9021300	10972000	47991000	65109000	32834000	34356000	21753000	28590000	6768800	6728700	84938000	90700000	40855000	46220000	47266000	57782000	6	P37802;Q9UI15;C9J5W6	P37802	Transgelin-2	TAGLN2	3	0.694749	1.94994	0.356293	2.80668	0.371398	0.00291841	0.0374646
40101000	24475000	80122000	28256000	67010000	45081000	32721000	36119000	34421000	81855000	97311000	88597000	121440000	101850000	79814000	74230000	85921000	80025000	9	P37837;F2Z393	P37837;F2Z393	Transaldolase	TALDO1	2	1.30163	1.90594	0.682933	1.46427	0.371664	0.0743777	0.0039326
424350000	441720000	312500000	290030000	125660000	151610000	188620000	167150000	112700000	115660000	149550000	137050000	72362000	61672000	80333000	73634000	138620000	130270000	18	P38159;P38159-2;H3BT71;H0Y6E7;Q96E39;H3BUY5;B3KRG5;P38159-3;H3BR27;O75526;H3BNC1;Q8N7X1	P38159;P38159-2;H3BT71;H0Y6E7;Q96E39;H3BUY5;B3KRG5	RNA-binding motif protein, X chromosome;RNA-binding motif protein, X chromosome, N-terminally processed;RNA binding motif protein, X-linked-like-1;RNA binding motif protein, X-linked-like-1, N-terminally processed	RBMX;RBMXL1	12	0.498737	0.318976	1.56356	0.639568	0.0250636	0.0159727	0.00521233
3961700	4728100	2548200	2871400	6449400	6815800	11798000	13221000	9484600	8923600	6914100	5743200	24819000	22803000	16511000	11556000	15138000	15941000	3	B0YIW6;P48444;P48444-2	B0YIW6;P48444;P48444-2	Coatomer subunit delta	ARCN1	3	2.04878	3.90026	0.525293	1.9037	0.00572388	0.00488581	0.000116572
206320000	198260000	196740000	197880000	153290000	180750000	75038000	73844000	65421000	62322000	60995000	70416000	100530000	100700000	57100000	71373000	82593000	88053000	15	P38919;I3L3H2;F8WE11;E9PBH4	P38919	Eukaryotic initiation factor 4A-III	EIF4A3	4	0.360061	0.441521	0.815503	1.22624	4.41792e-08	0.0633408	1.54872e-06
3099200000	2981400000	3289900000	3072500000	2448600000	2319300000	1691600000	1570500000	1546500000	1550600000	1858000000	1750200000	1028500000	1018600000	1409800000	1609600000	1290100000	1272000000	19	P39019;M0R140;M0QYF7;M0QXK4;M0R2L9	P39019	40S ribosomal protein S19	RPS19	5	0.579133	0.443242	1.30658	0.765355	2.93881e-05	0.0042997	5.83215e-06
1114600000	1052400000	1062100000	1080100000	1059200000	941790000	1016600000	1075400000	1085300000	1117400000	996970000	1215900000	830190000	916060000	1112800000	1083500000	1016800000	1058000000	23	P39023;G5E9G0;H7C422;B5MCW2;H7C3M2;F8WCR1;Q92901	P39023;G5E9G0;H7C422;B5MCW2	60S ribosomal protein L3	RPL3	7	1.03128	0.953593	1.08147	0.924669	0.428668	0.166374	0.355619
1	7429000	5331700	1	8726500	8475100	8899700	8515500	9453800	7417500	1	1	51134000	40213000	12154000	10434000	10216000	11458000	3	P39748;P39748-2;I3L3E9;F5H1Y3	P39748;P39748-2;I3L3E9	Flap endonuclease 1	FEN1	4	1.14432	4.52599	0.252834	3.95517	0.775901	0.0519788	0.0434083
7072600	8537100	7504100	3838100	10564000	10489000	23832000	20352000	19908000	16776000	14856000	12327000	33958000	24143000	21303000	20508000	25471000	22667000	5	E7ERF4;P30566;P30566-2	E7ERF4;P30566	Adenylosuccinate lyase	ADSL	3	2.25083	3.08406	0.729828	1.37019	0.000505847	0.0293478	2.25223e-05
1383000000	1295400000	1382600000	1504900000	1327200000	1185000000	1490500000	1423100000	1419800000	1355600000	1317200000	1429200000	1438300000	1402700000	1322400000	1325400000	1311000000	1325100000	28	P40227;B4DPJ8;P40227-2;J3KRI6	P40227;B4DPJ8;P40227-2	T-complex protein 1 subunit zeta	CCT6A	4	1.04423	1.00579	1.03822	0.963191	0.262282	0.147328	0.875611
861810000	826580000	789660000	830140000	780160000	644200000	776570000	781810000	807000000	781390000	887430000	849880000	697090000	787850000	735890000	861010000	754240000	681730000	12	P40429;M0QYS1;Q6NVV1;M0QZU1	P40429;M0QYS1	60S ribosomal protein L13a	RPL13A	4	1.03202	0.954625	1.08107	0.925007	0.503234	0.0894308	0.404975
35843000	32094000	1	6012600	121890000	96507000	73564000	59897000	23543000	18791000	18570000	8158800	125840000	100790000	72487000	83361000	60916000	102200000	9	P40926;E9PDB2;G3XAL0	P40926;E9PDB2;G3XAL0	Malate dehydrogenase, mitochondrial;Malate dehydrogenase	MDH2	3	0.692752	1.86626	0.371199	2.69397	0.528377	0.00264372	0.0885807
80696000	68909000	110110000	96405000	85980000	105920000	75337000	77006000	56472000	59369000	52407000	65311000	75608000	84488000	84081000	65940000	75340000	76973000	14	P40939;H0YFD6;B4DYP2	P40939	Trifunctional enzyme subunit alpha, mitochondrial;Long-chain enoyl-CoA hydratase;Long chain 3-hydroxyacyl-CoA dehydrogenase	HADHA	3	0.704175	0.84382	0.834509	1.19831	0.00535043	0.0283577	0.0688072
290980000	276690000	318000000	316000000	239830000	226370000	231820000	247330000	270370000	262070000	318110000	279310000	262480000	198250000	223120000	214220000	237640000	238980000	14	P41091;Q2VIR3;F8W810;Q2VIR3-2;H7BZU1	P41091;Q2VIR3;F8W810;Q2VIR3-2	Eukaryotic translation initiation factor 2 subunit 3;Putative eukaryotic translation initiation factor 2 subunit 3-like protein	EIF2S3;EIF2S3L	5	0.964709	0.824219	1.17045	0.85437	0.630862	0.0277314	0.0223389
30598000	18592000	11394000	13040000	19307000	20186000	51910000	55802000	54539000	55389000	60215000	65502000	103550000	65550000	108110000	73448000	95509000	86264000	1	O95399-2;Q5H8X8;O95399	O95399-2;Q5H8X8;O95399	Urotensin-2	UTS2	3	3.03541	4.70691	0.644885	1.55066	5.25449e-07	0.00132803	2.71352e-06
1	1	1	1	1	3253200	1	1	3435500	1	1	1	5359500	6688800	3380400	4668800	5362300	5221500	3	O60749;B4DEK4	O60749;B4DEK4	Sorting nexin-2	SNX2	2	1.05604	9.4311	0.111974	8.93065	0.970023	9.06431e-05	6.51668e-05
34587000	29765000	30591000	15319000	4813300	1	2290100	3642700	1	1	1	1	1	1	1	1	1	1	8	P42025	P42025	Beta-centractin	ACTR1B	1	0.0515558	5.21398e-08	988801	1.01133e-06	0.0126838	0.158763	0.00928115
402860000	375860000	352410000	436590000	265740000	267330000	410750000	396410000	439980000	482900000	482670000	449600000	346950000	371900000	420380000	465130000	410890000	426380000	19	P42167;G5E972;P42167-2;A2T926;P42166;H0YJH7	P42167;G5E972;P42167-2;A2T926;P42166	Lamina-associated polypeptide 2, isoforms beta/gamma;Thymopoietin;Thymopentin;Lamina-associated polypeptide 2, isoform alpha;Thymopoietin;Thymopentin	TMPO	6	1.26729	1.16224	1.09038	0.91711	0.0159388	0.133453	0.120893
677770000	680470000	870980000	803160000	675320000	681660000	455830000	444130000	579270000	581920000	615250000	698260000	403650000	319330000	439610000	493720000	463310000	494150000	5	P42677;Q5T4L4;H0YMV8;Q71UM5;C9JLI6;C9J1C5	P42677;Q5T4L4	40S ribosomal protein S27	RPS27	6	0.768827	0.595479	1.29111	0.774528	0.00924484	0.0248696	5.11096e-05
7876500	9249100	6002500	6400100	10705000	13149000	10624000	12040000	9514700	10547000	1	5194500	22985000	27752000	12337000	12519000	12606000	14022000	4	P42704;B8ZZ38;C9JCA9;H7C3W8	P42704	Leucine-rich PPR motif-containing protein, mitochondrial	LRPPRC	4	0.897681	1.91489	0.46879	2.13315	0.683418	0.0205322	0.0196947
452560000	421720000	417170000	537110000	285690000	393410000	516750000	708420000	533870000	532070000	491190000	451640000	610990000	387070000	571630000	477370000	550750000	491140000	8	P42766;F2Z388	P42766;F2Z388	60S ribosomal protein L35	RPL35	2	1.28962	1.23181	1.04694	0.955166	0.033735	0.63069	0.0650116
2474600	1	1	1	4582500	3597100	7999500	6944100	7699400	7185400	9407900	10689000	10611000	9780800	8920400	8518000	10714000	9452300	3	P43246;P43246-2;E9PHA6;C9J809	P43246;P43246-2;E9PHA6	DNA mismatch repair protein Msh2	MSH2	4	4.68597	5.44353	0.860833	1.16167	8.0712e-05	0.0807538	6.01433e-06
3326700	1857200	3852700	1	4179500	3378000	5962300	3342300	1	1	1	1	15792000	17055000	6074400	5511300	11347000	5308700	3	P38606;B7Z1R5	P38606;B7Z1R5	V-type proton ATPase catalytic subunit A	ATP6V1A	2	0.560718	3.68133	0.152314	6.56539	0.34273	0.00504921	0.00851526
102490000	81241000	72090000	89187000	68164000	90880000	85906000	94167000	94244000	103800000	106950000	116720000	98136000	90236000	110330000	97443000	96340000	107240000	9	P43686;P43686-2	P43686;P43686-2	26S protease regulatory subunit 6B	PSMC4	2	1.1939	1.18981	1.00344	0.996574	0.0396562	0.950807	0.0247228
26540000	16312000	15462000	26023000	29022000	30040000	38260000	38257000	26240000	27199000	24159000	19338000	72055000	61778000	41215000	43293000	42812000	37107000	4	P46060;F8W7I9;H0Y4Q3;B0QYT4;B0QYT5;B0QYT6	P46060;F8W7I9;H0Y4Q3	Ran GTPase-activating protein 1	RANGAP1	6	1.20958	2.07993	0.58155	1.71954	0.249366	0.00941247	0.00202825
10915000	11597000	7510300	1	6446400	7508000	1	1	1	1	1	1	1	1	1	1	1	1	3	P46087-4;P46087;P46087-2;P46087-3;F5GYR3;F5H5X6;F5H709;F5GWB7;F5H8G6;F5H359	P46087-4;P46087;P46087-2;P46087-3;F5GYR3	Putative ribosomal RNA methyltransferase NOP2	NOP2	10	1.36436e-07	1.36436e-07	1	1	0.0014705	#DIV/0!	0.0014705
5071100000	4725200000	5325800000	4838000000	5961300000	6090800000	18386000000	19063000000	19151000000	19975000000	23760000000	22734000000	26123000000	25078000000	31194000000	30516000000	30864000000	30786000000	52	P08107;P08107-2;E7EP94	P08107;P08107-2;E7EP94	Heat shock 70 kDa protein 1A/1B	HSPA1A	3	3.84444	5.45295	0.70502	1.4184	1.53829e-08	0.000134311	1.44302e-09
883990000	823300000	847110000	888640000	716660000	758280000	1110800000	1188700000	1095100000	1046000000	1137800000	1110700000	966060000	889990000	1097200000	1156500000	1111700000	1115400000	23	P46777;Q5T7N0;R4GNJ2	P46777	60S ribosomal protein L5	RPL5	3	1.36013	1.28851	1.05559	0.94734	6.09154e-06	0.236586	0.000930115
585710000	603350000	661560000	668760000	447660000	447900000	567260000	552640000	578260000	546280000	542930000	648400000	640460000	519970000	586370000	591130000	699160000	615380000	10	P46778;M0R181;G3V1B3;REV__Q9NRL2;REV__Q9NRL2-2;Q9H553;Q9H553-2;M0R3I5	P46778;M0R181;G3V1B3	60S ribosomal protein L21	RPL21	8	1.0061	1.06956	0.94067	1.06307	0.938169	0.245382	0.422715
422990000	437980000	424290000	416190000	363980000	390200000	420900000	519270000	482690000	470880000	447620000	515040000	415290000	392960000	496400000	465180000	480290000	511820000	13	P46779;H0YKD8;P46779-3;P46779-2;H0YMF4;P46779-5;P46779-4;H0YLP6	P46779;H0YKD8;P46779-3;P46779-2;H0YMF4;P46779-5;P46779-4;H0YLP6	60S ribosomal protein L28	RPL28	8	1.1632	1.12474	1.0342	0.96693	0.00585494	0.537623	0.0434471
4557300000	4836800000	5074800000	5541500000	3471400000	3697200000	2955200000	3224300000	3152900000	2955600000	3539400000	3267400000	2343300000	2108900000	2494800000	2574100000	2681200000	2815400000	24	P46781;C9JM19;B5MCT8;A8MXK4;F2Z3C0;O60271-9	P46781;C9JM19;B5MCT8	40S ribosomal protein S9	RPS9	6	0.702557	0.552548	1.27149	0.786481	0.00267747	0.000542916	0.000151686
1370900000	1253500000	1735700000	1801900000	1375100000	1164800000	833880000	810830000	747260000	668210000	770600000	792690000	495100000	467760000	643060000	597750000	736230000	670820000	19	P46783;S4R435;F6U211;Q9NQ39	P46783;S4R435;F6U211	40S ribosomal protein S10	RPS10	4	0.531317	0.414935	1.28048	0.780955	9.45797e-05	0.00603594	2.23388e-05
19453000	1	43133000	32906000	41424000	40928000	26467000	8969500	41702000	54485000	92949000	92669000	20923000	1	9823900	24514000	16044000	19274000	2	P06314;P06313;P06312;P01625	P06314;P06313;P06312;P01625	Ig kappa chain V-IV region B17;Ig kappa chain V-IV region JI;Ig kappa chain V-IV region;Ig kappa chain V-IV region Len	IGKV4-1	4	1.78382	0.509317	3.50238	0.28552	0.169427	0.0265415	0.092799
31787000	21771000	23155000	17851000	19603000	23550000	27822000	27985000	25549000	25343000	29723000	32968000	29507000	12164000	27433000	21694000	29194000	23442000	8	B1AK88;P47756-2;P47756;B1AK87;B1AK85;F6USW4;F6Q0E3	B1AK88;P47756-2;P47756;B1AK87;B1AK85;F6USW4	F-actin-capping protein subunit beta	CAPZB	7	1.22999	1.04151	1.18096	0.846768	0.043971	0.168819	0.78035
66512000	53731000	88947000	97905000	65332000	62259000	68827000	25079000	30273000	21581000	24304000	22816000	34821000	61784000	36757000	44963000	22600000	26873000	5	P47813;O14602;A6NJH9	P47813;O14602	Eukaryotic translation initiation factor 1A, X-chromosomal;Eukaryotic translation initiation factor 1A, Y-chromosomal	EIF1AX;EIF1AY	3	0.443723	0.524052	0.846715	1.18103	0.0027205	0.549322	0.00338531
106660000	103520000	107340000	102890000	137170000	140920000	144420000	156210000	156570000	154770000	163530000	141990000	139760000	128080000	151120000	150310000	132230000	138420000	4	P47914	P47914	60S ribosomal protein L29	RPL29	1	1.31351	1.20246	1.09235	0.915454	0.000982301	0.028512	0.0160569
25355000	37471000	18344000	16947000	63148000	59261000	42390000	46432000	43374000	37831000	22886000	32072000	144430000	111970000	45470000	43882000	54259000	65406000	6	P48047;H7C086;H7C0C1;H7C068	P48047	ATP synthase subunit O, mitochondrial	ATP5O	4	1.02022	2.11049	0.483405	2.06866	0.936033	0.0422214	0.0548082
1	4948200	4019500	4572500	1	6937800	12281000	14067000	9226200	13054000	9990500	1	1	12166000	16451000	9325500	14148000	28894000	1	P48507	P48507	Glutamate--cysteine ligase regulatory subunit	GCLM	1	2.86252	3.95471	0.723826	1.38155	0.0238394	0.415971	0.0313381
86822000	88216000	93003000	91640000	52850000	56215000	39650000	40332000	30964000	32619000	50262000	43155000	28272000	32524000	39955000	47601000	43390000	30267000	14	P48634;P48634-3;P48634-2;P48634-4	P48634;P48634-3;P48634-2;P48634-4	Protein PRRC2A	PRRC2A	4	0.505566	0.473623	1.06744	0.936818	0.000733961	0.574148	0.000512865
1604300000	1361200000	1567800000	1491200000	1320500000	1277200000	1564300000	1486100000	1711900000	1799000000	1542300000	1468700000	1488800000	1381800000	1625500000	1651500000	1563400000	1538200000	37	P48643;E9PCA1;B7ZAR1;E7ENZ3;B4DYD8;H0Y914;D6RIZ7	P48643;E9PCA1;B7ZAR1;E7ENZ3;B4DYD8	T-complex protein 1 subunit epsilon	CCT5	7	1.11019	1.07272	1.03493	0.966246	0.0679629	0.440353	0.158173
5934300	5156800	1975600	1923800	12105000	12586000	12396000	12958000	13440000	13603000	4750400	4667500	16821000	17322000	14555000	11200000	13830000	17095000	2	P49006	P49006	MARCKS-related protein	MARCKSL1	1	1.55778	2.2888	0.680608	1.46927	0.190178	0.0385784	0.00280671
410570000	421520000	407580000	350500000	401720000	420800000	333050000	330960000	330370000	323720000	399450000	358190000	349060000	419260000	393130000	386070000	339130000	341910000	5	P49207	P49207	60S ribosomal protein L34	RPL34	1	0.860343	0.923683	0.931427	1.07362	0.00552867	0.18344	0.10478
13388000	13332000	9485200	14389000	11649000	27310000	9064400	11124000	9310000	11870000	10230000	10079000	24044000	21242000	17434000	9544000	15815000	16470000	2	P49257	P49257	Protein ERGIC-53	LMAN1	1	0.688724	1.16745	0.589938	1.69509	0.105594	0.00636886	0.463759
80856000	75311000	54352000	32651000	92918000	110320000	177740000	223970000	127820000	142010000	77132000	74991000	337100000	254260000	198970000	201850000	205500000	221320000	8	P49321-3;P49321;P49321-2;Q5T624;P49321-4;H0YF33;E9PRH9;H0YDS9;E9PI86;E9PPQ8;E9PPR5	P49321-3;P49321;P49321-2;Q5T624;P49321-4;H0YF33;E9PRH9;H0YDS9	Nuclear autoantigenic sperm protein	NASP	11	1.84509	3.17871	0.580453	1.72279	0.0372853	0.011507	6.02342e-05
259450000	283990000	185270000	220020000	434750000	463910000	495710000	538130000	457310000	467700000	346760000	372760000	934420000	998840000	585820000	646660000	722260000	711840000	51	P49327;J3KTF0	P49327	Fatty acid synthase;[Acyl-carrier-protein] S-acetyltransferase;[Acyl-carrier-protein] S-malonyltransferase;3-oxoacyl-[acyl-carrier-protein] synthase;3-oxoacyl-[acyl-carrier-protein] reductase;3-hydroxypalmitoyl-[acyl-carrier-protein] dehydratase;Enoyl-[acyl-carrier-protein] reductase;Oleoyl-[acyl-carrier-protein] hydrolase	FASN	2	1.44981	2.48991	0.582275	1.7174	0.0320404	0.00139287	0.000222988
1281700000	1262300000	1530400000	1537400000	1423400000	1522800000	1585800000	1576200000	1652400000	1722400000	1647200000	1723000000	1521100000	1490600000	1593600000	1639000000	1553600000	1590300000	33	P49368;P49368-2;B4DUR8;E9PRC8;Q5SZX6;Q5SZW8;Q5SZX9;E9PM09;E9PQ35	P49368;P49368-2;B4DUR8	T-complex protein 1 subunit gamma	CCT3	9	1.15763	1.09701	1.05526	0.947633	0.00303171	0.0291878	0.0336178
1162600	1650700	553190	1	2663500	2894500	2760500	3725000	2733500	1	1588200	1	10538000	5146600	3722400	3460200	5493200	4809300	1	B7Z233;Q9BWD1	B7Z233;Q9BWD1	Acetyl-CoA acetyltransferase, cytosolic	ACAT2	2	1.21096	3.7167	0.325815	3.06922	0.698669	0.0126283	0.00568107
27423000	25217000	1	15505000	21486000	16192000	32459000	38758000	28243000	36276000	51280000	50987000	17505000	14761000	31533000	38350000	29289000	15957000	3	P49458;P49458-2;E9PE20	P49458;P49458-2;E9PE20	Signal recognition particle 9 kDa protein	SRP9	3	2.24907	1.39284	1.61473	0.619299	0.00282829	0.0223282	0.250244
6847400	6120200	1	1	5033800	6187200	22098000	1	14966000	12175000	10239000	6772600	19058000	17346000	13025000	10803000	13812000	11728000	4	P49588;H3BPK7	P49588;H3BPK7	Alanine--tRNA ligase, cytoplasmic	AARS	2	2.73892	3.54597	0.772404	1.29466	0.0607177	0.351363	0.000248468
8058900	3728700	1	1	14956000	16159000	9415600	10171000	5663800	6916300	4982800	1	61362000	47791000	13230000	14201000	13872000	14416000	4	Q5T5C7;P49591	Q5T5C7;P49591	Serine--tRNA ligase, cytoplasmic	SARS	2	0.865903	3.84294	0.225323	4.43807	0.776327	0.0373965	0.0521078
1	1	1	1	1	3088400	1	1	1	1	1	1	6006700	6142300	1	1	4181500	4840500	2	C9J1Z8;P84085	C9J1Z8;P84085	ADP-ribosylation factor 5	ARF5	2	1.94275e-06	6.855	2.83407e-07	3.5285e+06	0.340893	0.0121489	0.0383935
35606000	20205000	1	12911000	1	51217000	26633000	20388000	25543000	8510900	1	1	70634000	26066000	21866000	19203000	24247000	18021000	4	P49773;D6RD60;D6RE99;D6REP8;D6RC06	P49773;D6RD60;D6RE99;D6REP8;D6RC06	Histidine triad nucleotide-binding protein 1	HINT1	5	0.675968	1.50107	0.450324	2.22063	0.519394	0.117431	0.411304
58232000	65025000	229110000	167260000	87948000	119760000	20597000	25335000	24483000	32770000	22740000	20853000	16906000	15369000	13454000	12209000	13060000	18272000	11	P49902;B7Z382;Q5JUV4;Q5JUV3;Q5JUV6;S4R3A6;S4R3E7;H0YHR8	P49902;B7Z382;Q5JUV4	Cytosolic purine 5-nucleotidase	NT5C2	8	0.201802	0.122736	1.6442	0.608197	0.00513508	0.000948613	0.00284326
1367200	1268900	1	1	1447000	1476400	1570100	1983800	1	1979600	1	1	2738100	1994200	2260700	2809200	2062300	1	1	P50402;Q5HY57	P50402;Q5HY57	Emerin	EMD	2	0.995324	2.13409	0.466392	2.14412	0.993394	0.104597	0.0673197
1	1	11255000	13138000	1	1	1	28265000	1	28520000	21941000	26897000	1	1	1	1	31590000	1	2	P50454;E9PPV6;E9PR70;E9PMI5;E9PK86;E9PNX1;E9PKH2;E9PRS3;E9PIG2;E9PJH8;E9PQ34;H0YEP8	P50454;E9PPV6;E9PR70;E9PMI5;E9PK86;E9PNX1;E9PKH2;E9PRS3;E9PIG2;E9PJH8;E9PQ34;H0YEP8	Serpin H1	SERPINH1	12	4.33005	1.29504	3.34356	0.299083	0.054322	0.141205	0.842034
42402000	43659000	4175200	10130000	123900000	93200000	57258000	59782000	38893000	39524000	1	1	222210000	206480000	68245000	63692000	103930000	87093000	8	P50502;Q8NFI4;Q8IZP2;H7C3I1;F6VDH7;F8WAQ7	P50502;Q8NFI4;Q8IZP2;H7C3I1;F6VDH7	Hsc70-interacting protein;Putative protein FAM10A5;Putative protein FAM10A4	ST13;ST13P5;ST13P4	6	0.615678	2.36765	0.260037	3.8456	0.378724	0.0131833	0.0632789
3343700	3067400	2878900	2948200	2369100	2215000	2587900	2737900	2334000	2985800	2671000	2516300	1430000	1	2232900	2357700	1813200	2165500	2	P50750-2;P50750	P50750-2;P50750	Cyclin-dependent kinase 9	CDK9	2	0.941185	0.594407	1.5834	0.631552	0.422233	0.0257746	0.0176862
337790000	364850000	336700000	329700000	268910000	318390000	339990000	411820000	360030000	433760000	337150000	336570000	300930000	272860000	392100000	415000000	351070000	341350000	8	P50914;E7EPB3	P50914;E7EPB3	60S ribosomal protein L14	RPL14	2	1.13442	1.05979	1.07042	0.93421	0.0708143	0.403268	0.461095
1511400000	1459200000	1479200000	1489000000	1288400000	1221300000	1684200000	1716700000	1753500000	1642600000	1598600000	1503900000	1675700000	1611900000	1658100000	1597800000	1629400000	1624800000	39	P50990;B4DEM7;B4DQH4;H7C4C8;H7C2U0	P50990;B4DEM7;B4DQH4	T-complex protein 1 subunit theta	CCT8	5	1.17175	1.1597	1.01039	0.989717	0.00289033	0.669235	0.00133316
1342600000	1460700000	1483500000	1521700000	1323900000	1395600000	1245300000	1310200000	1254900000	1281700000	1300200000	1516000000	1149100000	1193700000	1292000000	1315900000	1201200000	1294800000	29	P50991;P50991-2;B7Z9L0;B7Z2F4	P50991;P50991-2;B7Z9L0;B7Z2F4	T-complex protein 1 subunit delta	CCT4	4	0.927333	0.873206	1.06199	0.941631	0.0764516	0.151264	0.00182647
21332000	26247000	27750000	24175000	19374000	26652000	1	1	1	1	1	1	1	22253000	1	1	1	11976000	3	P51116;P51114;B4DXZ6;P51114-2;P51114-3;E9PFF5;E7EU85;Q06787;Q06787-3;Q06787-7;G8JL90;Q06787-5;Q06787-4;Q06787-2;G3V0J0;Q06787-6;Q06787-8;A8MQB8;F8W871;I3L1Z2	P51116;P51114;B4DXZ6;P51114-2;P51114-3;E9PFF5;E7EU85	Fragile X mental retardation syndrome-related protein 2;Fragile X mental retardation syndrome-related protein 1	FXR2;FXR1	20	4.12286e-08	0.235202	1.7529e-07	5704834	5.90577e-09	0.168633	0.00105092
2279900	2279000	1	1556500	3972500	4080700	2477600	3624600	1	1936100	1	1	17244000	13284000	5106400	5604800	6507400	6757900	1	Q06203;D6RCC8	Q06203;D6RCC8	Amidophosphoribosyltransferase	PPAT	2	0.567332	3.84685	0.14748	6.7806	0.280359	0.00460351	0.0102016
399920000	284960000	304730000	313460000	260800000	295880000	196570000	227890000	226290000	229060000	281720000	281350000	287460000	388930000	337400000	292500000	239410000	263800000	3	Q9HBD4;P51532;P51532-4;P51532-3;P51532-2;P51532-5;P51531;P51531-2;H0YGM3	Q9HBD4;P51532;P51532-4;P51532-3;P51532-2;P51532-5	Transcription activator BRG1	SMARCA4	9	0.775846	0.97298	0.797392	1.25409	0.0157018	0.040619	0.781269
3356700	6607900	3890800	3903700	16358000	13796000	18576000	16510000	17108000	19961000	16049000	11776000	28421000	47015000	18683000	20364000	24987000	18248000	3	P51571;A6NLM8;H7C1C6	P51571;A6NLM8;H7C1C6	Translocon-associated protein subunit delta	SSR4	3	2.08669	3.29175	0.633916	1.5775	0.00719345	0.062511	0.00445965
918990	1598100	1	1	3317100	2811200	2572300	2231500	2639800	2631000	1	1990500	7486500	10834000	3680700	4901100	4070000	3263800	1	P53618;E9PP73	P53618;E9PP73	Coatomer subunit beta	COPB1	2	1.39555	3.96004	0.352409	2.83761	0.439493	0.0153027	0.00920838
4815600	2341300	2306500	2289700	1683000	1758600	1469600	1733800	1804600	1939300	2012900	1803300	1	1030500	1438400	1544600	1511700	1573200	3	P51587	P51587	Breast cancer type 2 susceptibility protein	BRCA2	1	0.708372	0.467163	1.51633	0.659488	0.153457	0.0418545	0.0300591
52598000	49454000	70011000	63499000	66127000	68275000	54782000	59945000	50597000	45446000	18672000	25288000	68350000	104800000	45437000	55289000	45036000	51808000	6	P51665;B4DXI8;H3BTM8;H3BNT7;H3BQV2	P51665;B4DXI8;H3BTM8;H3BNT7	26S proteasome non-ATPase regulatory subunit 7	PSMD7	5	0.688526	1.00204	0.687122	1.45534	0.0310995	0.124048	0.990113
1	1	1	1	10496000	10657000	1205700000	1209500000	1585700000	1080400000	2085600000	2473100000	1198900000	1025200000	1915500000	1810500000	1615400000	2016100000	4	P51668;Q9UQL0	P51668;Q9UQL0	Ubiquitin-conjugating enzyme E2 D1	UBE2D1;UBE2D4	2	455.727	452.966	1.0061	0.993942	3.74195e-05	0.973138	2.08896e-06
93494000	77531000	60325000	39133000	235030000	256680000	219910000	195700000	184380000	177470000	88029000	94377000	543810000	532320000	306430000	315980000	294970000	302640000	14	P30101;G5EA52	P30101;G5EA52	Protein disulfide-isomerase A3	PDIA3	2	1.25935	3.01256	0.418033	2.39216	0.476348	0.00210078	0.00216228
124050000	131800000	86811000	93780000	83145000	65334000	70183000	86259000	68840000	72518000	63742000	60875000	26546000	73208000	43976000	30690000	58268000	85342000	8	P51991;P51991-2;H7C1J8	P51991;P51991-2	Heterogeneous nuclear ribonucleoprotein A3	HNRNPA3	3	0.722179	0.543715	1.32823	0.752882	0.0338195	0.120624	0.0104679
493180000	532700000	330540000	408260000	333660000	344180000	528930000	575500000	613560000	610500000	756810000	765710000	437530000	503830000	547870000	524260000	573620000	548500000	32	P52272;P52272-2;M0R2I7;M0R2T0;M0R019;M0QY96;M0R0N3;M0QYQ7;M0R0Y6;M0QYL3	P52272;P52272-2	Heterogeneous nuclear ribonucleoprotein M	HNRNPM	10	1.57665	1.28376	1.22815	0.814231	0.00136211	0.022751	0.0177838
64962000	77706000	66318000	54249000	96141000	86316000	82494000	70166000	91278000	85914000	75716000	51784000	109430000	136280000	85332000	106920000	101040000	86982000	9	P52292;J3KS65;J3QLL0;J3QL07	P52292;J3KS65;J3QLL0	Importin subunit alpha-2	KPNA2	4	1.02616	1.40452	0.730613	1.36871	0.824265	0.014498	0.0122552
1	1	1	1	6725700	1	1	5755000	1	9737400	6822100	8069800	7655400	1	6592000	1	5549300	5633800	2	P52298;A6PVI3;P52298-2;E9PAR5;B3KSB0;C9JQX9;F8WE41	P52298;A6PVI3;P52298-2;E9PAR5;B3KSB0;C9JQX9;F8WE41	Nuclear cap-binding protein subunit 2;Nuclear cap-binding protein subunit 2-like	NCBP2;NCBP2L	7	4.51764	3.78109	1.1948	0.836962	0.0805482	0.712775	0.109532
170980000	161020000	138390000	139020000	155260000	139240000	140930000	126160000	106800000	96207000	86853000	103170000	113020000	124080000	135160000	110290000	98463000	154850000	10	P52597	P52597	Heterogeneous nuclear ribonucleoprotein F;Heterogeneous nuclear ribonucleoprotein F, N-terminally processed	HNRNPF	1	0.730294	0.814089	0.897069	1.11474	0.00217392	0.301435	0.0185257
26779000000	26610000000	29843000000	31047000000	21390000000	22483000000	9317900000	9337000000	11232000000	10661000000	12239000000	12755000000	5505200000	5486300000	8772600000	8729400000	8475600000	8619400000	82	P52732	P52732	Kinesin-like protein KIF11	KIF11	1	0.414423	0.288257	1.43768	0.695563	3.38932e-06	0.00381495	6.63419e-07
38124000	46288000	60262000	100690000	100830000	71184000	66914000	61033000	96465000	126940000	142060000	136910000	17885000	27644000	34596000	31036000	40598000	27033000	3	P02462;P02462-2;P29400-2;P29400	P02462;P02462-2;P29400-2;P29400	Collagen alpha-1(IV) chain;Arresten;Collagen alpha-5(IV) chain	COL4A1;COL4A5	4	1.51019	0.428369	3.52545	0.283652	0.0792001	0.000489007	0.00567842
95744000	79137000	103310000	96584000	123310000	95659000	97724000	92378000	92932000	86125000	95855000	96457000	119150000	128370000	115930000	122160000	87012000	103310000	5	P52907;P47755;F8W9N7;B4DG50;C9JUG7	P52907	F-actin-capping protein subunit alpha-1	CAPZA1	5	0.945645	1.13842	0.830662	1.20386	0.399298	0.0136295	0.138083
10438000	1	1	1	1	1	20361000	22579000	22785000	23418000	33677000	28825000	17047000	29411000	25581000	26898000	21470000	19765000	3	P53007;B4DP62	P53007	Tricarboxylate transport protein, mitochondrial	SLC25A1	2	14.5282	13.429	1.08185	0.924343	5.11374e-06	0.509709	8.08426e-06
87616000	92915000	18176000	36329000	205010000	232410000	238840000	231650000	136640000	145180000	23270000	1	450640000	502640000	258150000	345340000	258660000	235230000	8	P09211;A8MX94	P09211;A8MX94	Glutathione S-transferase P	GSTP1	2	1.15335	3.04951	0.37821	2.64403	0.759321	0.00621144	0.002746
1	3653100	1	1	1	5010600	5016900	5277600	1	4794700	1	1	15339000	13050000	5723300	5800600	5939800	6657400	2	P0C7P4;P47985	P0C7P4;P47985	Putative cytochrome b-c1 complex subunit Rieske-like protein 1;Cytochrome b-c1 complex subunit Rieske, mitochondrial;Cytochrome b-c1 complex subunit 11	UQCRFS1P1;UQCRFS1	2	1.74166	6.06093	0.287358	3.47998	0.480286	0.0134614	0.00421161
23650000	30469000	25899000	28734000	32376000	28101000	115570000	113120000	131610000	111970000	135440000	117210000	102350000	75030000	116650000	176160000	196610000	163710000	3	P53985;Q5T8R5;Q49A45;Q5T8R3	P53985;Q5T8R5;Q49A45;Q5T8R3	Monocarboxylate transporter 1	SLC16A1	4	4.28366	4.90761	0.872861	1.14566	1.06241e-09	0.394799	0.000203623
265520000	300410000	267220000	266990000	272440000	287000000	287280000	313920000	428880000	419850000	573560000	576280000	329630000	279600000	301900000	386280000	383390000	388900000	9	P53999;D6R970;D6RC37	P53999	Activated RNA polymerase II transcriptional coactivator p15	SUB1	3	1.56652	1.24712	1.25611	0.796109	0.0113411	0.132654	0.00733515
4574000000	3819000000	5131600000	5132900000	3174300000	3476200000	2003000000	1573800000	2023600000	2035800000	2240500000	1473700000	715330000	940400000	1282700000	1307700000	1138800000	1497500000	8	P54105;J3KN38;E9PMI6;E9PJF4;E9PQ83	P54105;J3KN38;E9PMI6;E9PJF4	Methylosome subunit pICln	CLNS1A	5	0.448491	0.271947	1.64918	0.60636	8.51432e-05	0.00125607	7.52453e-06
109480000	106430000	94412000	109330000	84323000	105420000	140560000	137820000	144610000	158950000	151280000	133670000	173170000	167620000	145010000	148250000	156820000	165410000	11	P54136;P54136-2;F5H3T8;E5RJM9;E5RH09	P54136;P54136-2;F5H3T8	Arginine--tRNA ligase, cytoplasmic	RARS	5	1.42254	1.56923	0.906523	1.10312	1.72267e-05	0.0313304	2.86682e-06
18631000	16827000	16113000	31583000	74567000	81604000	41463000	45643000	29071000	34987000	18228000	19444000	86702000	150460000	42964000	42798000	52863000	58945000	12	P54577	P54577	Tyrosine--tRNA ligase, cytoplasmic	YARS	1	0.789036	1.81649	0.434373	2.30217	0.537073	0.0416988	0.151064
11056000	3652100	21737000	21161000	9004700	9444600	7593200	6791000	6951800	10959000	1	33467000	31191000	52459000	10662000	13802000	11111000	13003000	3	P54727;P54727-2;P54725;P54725-2;Q5W0S5;K7ELW1;K7ENJ0;H0Y579	P54727;P54727-2	UV excision repair protein RAD23 homolog B	RAD23B	8	0.864659	1.73857	0.497338	2.01071	0.764742	0.212827	0.238026
32701000	31246000	40650000	30832000	64465000	67446000	62519000	59452000	45827000	42058000	23118000	34128000	92737000	120040000	65377000	60767000	62102000	92303000	12	P54886;P54886-2	P54886;P54886-2	Delta-1-pyrroline-5-carboxylate synthase;Glutamate 5-kinase;Gamma-glutamyl phosphate reductase	ALDH18A1	2	0.99911	1.84531	0.541431	1.84696	0.99666	0.00798948	0.00997371
35315000	21969000	18632000	21484000	17293000	17058000	24147000	31790000	18194000	15069000	17839000	21656000	26072000	23572000	19103000	15025000	19140000	23549000	3	P55010;H0YN40;H0YLZ1;H0YM54;H0YMJ8;H0YK11;H0YK29	P55010	Eukaryotic translation initiation factor 5	EIF5	7	0.976805	0.959849	1.01767	0.982641	0.893674	0.901891	0.791741
254780000	232490000	285540000	276540000	200180000	186700000	302490000	315100000	337480000	314690000	376820000	404000000	207920000	174710000	310130000	357670000	322420000	320640000	11	P55036;Q5VWC4;P55036-2;A6PVX3;A2A3N6;H0Y3Y9;H0Y561	P55036;Q5VWC4;P55036-2;A6PVX3	26S proteasome non-ATPase regulatory subunit 4	PSMD4	7	1.42775	1.17912	1.21086	0.825859	0.00132638	0.110917	0.236351
69838000	136580000	30366000	31493000	143800000	110850000	188700000	174170000	133570000	99673000	363850000	287560000	355580000	385470000	197530000	229190000	209930000	181330000	9	P55060;P55060-3;P55060-4;B4DUC5;P55060-2	P55060;P55060-3;P55060-4;B4DUC5	Exportin-2	CSE1L	5	2.38565	2.98135	0.800192	1.2497	0.0242617	0.359936	0.00189527
258930000	281960000	206260000	223490000	327120000	295690000	346550000	396070000	322230000	292230000	236520000	221670000	487410000	529820000	412670000	406350000	434690000	441490000	28	P55072;C9IZA5;C9JUP7;E7EQM8	P55072	Transitional endoplasmic reticulum ATPase	VCP	4	1.13921	1.70224	0.669241	1.49423	0.2867	0.00118003	3.98221e-05
68414000	61320000	74687000	89585000	62392000	51790000	45469000	31137000	43767000	51299000	48170000	30391000	11096000	25281000	14741000	35761000	30243000	44874000	15	P55795;Q9NQA5;H7C2J6;P31942;P31942-2;B4DHY1;H0YBK1	P55795	Heterogeneous nuclear ribonucleoprotein H2	HNRNPH2	7	0.613034	0.396866	1.54469	0.647381	0.00217157	0.0427336	0.000257487
1366000000	1431600000	1831700000	1822700000	1088600000	1072000000	782570000	757470000	816320000	815290000	950360000	993480000	597920000	547090000	631200000	567130000	613820000	660780000	38	P55884-2;P55884;C9JZG1;C9JQN7	P55884-2;P55884	Eukaryotic translation initiation factor 3 subunit B	EIF3B	4	0.593954	0.420075	1.41392	0.707252	0.00219137	0.000163326	0.000127978
66042000	42478000	31298000	34768000	55412000	59509000	47468000	54464000	54736000	60938000	55284000	54820000	79790000	78183000	55322000	68948000	57044000	72781000	9	P56192;A6NC17;B3KVK7;H0YHV5;H0YIP0;H0YI94;F5H2V6;H0YI27;H0YHL6;H0YIC2	P56192;A6NC17;B3KVK7	Methionine--tRNA ligase, cytoplasmic	MARS	10	1.13196	1.42334	0.795281	1.25742	0.315391	0.0121799	0.0172615
3279800	2491300	1446700	2350600	4834000	4682100	3792200	4166400	4137000	1	3356300	2573400	1	6291500	5374400	4853800	4961900	4582300	2	P56381;Q5VTU8	P56381;Q5VTU8	ATP synthase subunit epsilon, mitochondrial;ATP synthase subunit epsilon-like protein, mitochondrial	ATP5E;ATP5EP2	2	0.9445	1.36571	0.691581	1.44596	0.839945	0.255509	0.297403
7266000	6047100	1	1	12230000	9983600	1	1	1	1	1	1	42889000	15544000	1	1	1	1	2	P56385	P56385	ATP synthase subunit e, mitochondrial	ATP5I	1	1.68887e-07	1.64476	1.02682e-07	9738834	0.016848	0.200117	0.616864
27114000	37242000	14424000	24244000	28250000	21710000	44360000	53474000	67850000	43098000	36359000	1	59004000	73360000	55481000	54883000	59879000	59223000	3	P56537;B7ZBH1;P56537-2	P56537;B7ZBH1	Eukaryotic translation initiation factor 6	EIF6	3	1.6024	2.36515	0.677503	1.47601	0.148121	0.0727003	7.50933e-06
46463000	38484000	9472600	6375900	182340000	198130000	107280000	115050000	16297000	15486000	1	8087100	91468000	88017000	82757000	81309000	46429000	69382000	12	P60174;P60174-1;P60174-4;U3KPZ0;U3KQF3;U3KPS5	P60174;P60174-1;P60174-4;U3KPZ0	Triosephosphate isomerase	TPI1	6	0.544814	0.954488	0.570792	1.75195	0.399017	0.175433	0.921399
1502500000	1508600000	1930700000	1847400000	1076400000	1092600000	904160000	919470000	878430000	1009800000	1041200000	1186200000	606030000	648110000	800140000	849910000	707180000	799290000	25	P60228;E5RGA2;H0YBR5;E5RHS5;H0YAW4;E5RIT4;E5RII3;E5RJ25;E5RIP5;H0YBP5	P60228;E5RGA2	Eukaryotic translation initiation factor 3 subunit E	EIF3E	10	0.662997	0.49236	1.34657	0.742628	0.00867503	0.00196708	0.000562383
10849000	16812000	10205000	9444000	14301000	15681000	59541000	60320000	49921000	53043000	114990000	90292000	55873000	50262000	53169000	75355000	75558000	68463000	3	P60468;S4R3B5	P60468	Protein transport protein Sec61 subunit beta	SEC61B	2	5.53883	4.89934	1.13052	0.884545	0.000254921	0.490231	1.09651e-06
3925600	3471100	1	1	1943600	1844400	13114000	15071000	15019000	14599000	16463000	21881000	19737000	10708000	30488000	19853000	16849000	12860000	2	P60604;P60604-2;F8WDB1;F8WCB9	P60604;P60604-2;F8WDB1;F8WCB9	Ubiquitin-conjugating enzyme E2 G2	UBE2G2	4	8.5963	9.87912	0.870148	1.14923	1.65696e-06	0.458988	0.000208007
561150000	555940000	543370000	440580000	949440000	927360000	958130000	1005800000	848380000	790830000	618780000	569640000	1880400000	1857200000	950490000	1143600000	1191100000	1248600000	24	P60842;P60842-2;J3KT12;J3QS69;J3KTB5;J3QL43;J3KSZ0;Q14240-2;Q14240;E7EQG2;J3QR64;J3KTN0;J3KS25;J3QLN6;Q9NZE6;J3QKZ9;J3QL52;J3KSN7;J3KS93;J3KT04;E7EMV8;J3QQP0	P60842;P60842-2;J3KT12;J3QS69;J3KTB5;J3QL43;J3KSZ0	Eukaryotic initiation factor 4A-I	EIF4A1	22	1.20456	2.07937	0.579293	1.72624	0.263576	0.00802477	0.00295144
1233500000	1119100000	1783300000	1388900000	971990000	1238200000	665670000	708830000	674330000	614290000	600840000	732290000	610360000	549390000	566690000	611790000	580200000	524390000	9	P60866;P60866-2;E5RJX2;G3XAN0;E5RIP1	P60866;P60866-2;E5RJX2	40S ribosomal protein S20	RPS20	5	0.516646	0.445097	1.16075	0.861513	0.000310413	0.00443998	9.72568e-05
104950000	121140000	114170000	103220000	177180000	156030000	319700000	369530000	192620000	307850000	193560000	256670000	410630000	331140000	260550000	182980000	303650000	302900000	9	P60891;P21108;B4DNL6;B1ALA9;P11908-2;P11908;B1ALA7;D3YTJ7;H7C540;A6NMS2	P60891;P21108;B4DNL6;B1ALA9;P11908-2;P11908	Ribose-phosphate pyrophosphokinase 1;Ribose-phosphate pyrophosphokinase 3;Ribose-phosphate pyrophosphokinase;Ribose-phosphate pyrophosphokinase 2	PRPS1;PRPS1L1;PRPS2	10	2.11143	2.30703	0.915216	1.09264	0.00109965	0.564689	0.000465443
5215600	6330000	1	1	17040000	14268000	18540000	14282000	10099000	12225000	6220500	4428400	68496000	54003000	18815000	21147000	27489000	25984000	3	P14324;P14324-2	P14324;P14324-2	Farnesyl pyrophosphate synthase	FDPS	2	1.53534	5.03888	0.304699	3.28193	0.314519	0.0153285	0.00832371
32391000	68368000	52919000	13203000	55003000	90687000	22686000000	20153000000	27880000000	33134000000	34814000000	47439000000	14305000000	16296000000	43849000000	36134000000	28711000000	30296000000	8	P61077-2;P61077;P61077-3;H9KV45;D6RAH7;D6RA11;D6RIZ3;D6R980;D6RGD0;D6R933;D6R9F6;D6RFM0;D6RAW0	P61077-2;P61077;P61077-3;H9KV45;D6RAH7;D6RA11	Ubiquitin-conjugating enzyme E2 D3	UBE2D3	13	595.404	542.568	1.09738	0.91126	1.65313e-05	0.663792	0.000119737
1	1	1	1	1	1	6431900	7560900	6540200	1	1	4885900	23140000	21303000	6294300	7908000	6807100	11493000	1	F5H740;Q9Y277-2;Q9Y277	F5H740;Q9Y277-2;Q9Y277	Voltage-dependent anion-selective channel protein 3	VDAC3	3	4.23648e+06	1.28242e+07	0.33035	3.02709	0.0120408	0.0289264	0.0019036
1	1	1	1	1	6342600	1	1	1	1	1	1	1	13716000	1	9146200	1	5874100	2	P61106	P61106	Ras-related protein Rab-14	RAB14	1	9.45984e-07	4.53068	2.08795e-07	4.78938e+06	0.340893	0.070988	0.181069
39978000	32182000	43502000	72305000	59039000	67555000	25411000	33588000	41339000	38852000	39221000	1	26419000	1	32900000	26601000	1	30317000	8	P61160;P61160-2;F5H6T1	P61160;P61160-2;F5H6T1	Actin-related protein 2	ACTR2	3	0.567175	0.369521	1.53489	0.651513	0.0332624	0.271745	0.00450181
526610000	475350000	625310000	515100000	391260000	473840000	361510000	331420000	345930000	388450000	374580000	341710000	280040000	294580000	413950000	410600000	317850000	280170000	13	P61163;B4DXP9;R4GMT0;F5H3I4	P61163;B4DXP9;R4GMT0;F5H3I4	Alpha-centractin	ACTR1A	4	0.712759	0.664076	1.07331	0.931699	0.00132823	0.390839	0.00201138
5208100000	5418000000	5847600000	5440000000	3938200000	3962000000	2483200000	2685300000	2770000000	2790000000	2947000000	3032100000	1901600000	2027700000	2388300000	2430700000	2187100000	2203900000	28	P61247;E9PFI5;F5H4F9;D6RAT0;D6RG13;H0Y9Y4;H0Y8L7;D6RB09;D6R9B6;D6RAS7;D6RI02;D6RED7;D6RGE0	P61247;E9PFI5;F5H4F9;D6RAT0;D6RG13;H0Y9Y4;H0Y8L7;D6RB09	40S ribosomal protein S3a	RPS3A	13	0.560396	0.440711	1.27157	0.786427	8.04529e-05	0.000413509	1.062e-05
831670000	938910000	876540000	896730000	653070000	593120000	932080000	993050000	939800000	852650000	890640000	846080000	867030000	714880000	811160000	828600000	857540000	809710000	13	P61254;J3QQV1;J3QQQ9;J3QRI7;J3QRC4;J3KTJ8;J3KSS0;J3KS10	P61254;J3QQV1;J3QQQ9;J3QRI7;J3QRC4;J3KTJ8	60S ribosomal protein L26	RPL26	8	1.13868	1.02064	1.11565	0.896342	0.10523	0.0147461	0.79521
604320000	663080000	688810000	678260000	658610000	667360000	731670000	882920000	829730000	749540000	720330000	760260000	692650000	809870000	771380000	865430000	815640000	843930000	13	P61313;E7EQV9;E7ENU7;E7EX53;P61313-2;E7ERA2	P61313;E7EQV9;E7ENU7;E7EX53	60S ribosomal protein L15;Ribosomal protein L15	RPL15	6	1.18029	1.21171	0.974067	1.02662	0.00196299	0.578636	0.00051989
816180000	916390000	785660000	905110000	509810000	551550000	729580000	779480000	662310000	589100000	755480000	671860000	776330000	691710000	587310000	663210000	705010000	642830000	12	P61353;K7ELC7;K7EQQ9;K7ERY7	P61353;K7ELC7;K7EQQ9	60S ribosomal protein L27	RPL27	4	0.933799	0.906727	1.02986	0.971009	0.536402	0.612812	0.382428
147690000	113680000	98401000	100340000	126630000	84245000	95271000	143870000	126990000	144660000	155550000	122930000	97852000	115810000	51656000	89960000	59373000	48695000	5	P61513;E9PEL3;Q6P4E4;C9J4Z3;G5E9R3;A6NKH3;M0R2L6;M0R0A1	P61513;E9PEL3;Q6P4E4;C9J4Z3;G5E9R3	60S ribosomal protein L37a	RPL37A	8	1.17629	0.690545	1.70342	0.587056	0.153687	0.00356312	0.0398751
86445000	84558000	34434000	33819000	227570000	208570000	228910000	189920000	141390000	106700000	1	14286000	450800000	503430000	254150000	225270000	256950000	249410000	18	P14625;Q58FF3	P14625	Endoplasmin	HSP90B1	2	1.0086	2.8724	0.351135	2.84791	0.985309	0.00701655	0.00578505
6305600	6804000	7891900	1	12328000	11611000	15691000	10141000	11385000	11475000	7258600	5903900	56755000	52547000	13100000	13548000	16645000	29848000	4	P24539;Q5QNZ2	P24539;Q5QNZ2	ATP synthase subunit b, mitochondrial	ATP5F1	2	1.37636	4.05966	0.339035	2.94955	0.248474	0.0342314	0.0198549
6292900	6385000	4560000	3575800	8040800	9077000	8949500	7713600	8343100	7822500	7581500	9824400	11435000	11813000	5183300	8292700	11430000	12328000	4	P61758;F5H2A7	P61758;F5H2A7	Prefoldin subunit 3	VBP1	2	1.32435	1.59451	0.830571	1.20399	0.0484872	0.182734	0.0240734
2202800000	2431200000	2605400000	2544300000	2002800000	2063100000	1496000000	1355600000	1499800000	1451200000	1519500000	1512200000	1143100000	1255000000	1295400000	1352200000	1285900000	1283800000	28	P61978-2;P61978;Q5T6W1;S4R359;S4R457	P61978-2;P61978;Q5T6W1	Heterogeneous nuclear ribonucleoprotein K	HNRNPK	5	0.637874	0.549864	1.16006	0.862026	1.43801e-05	0.000326923	2.20198e-06
9685900	6558300	1	1	6034500	1	1	1	1	1	1	1	1	1	1	1	1	1	28	P61978-3;Q5T6W5;Q5T6W2	P61978-3;Q5T6W5;Q5T6W2		HNRNPK	3	2.69315e-07	2.69315e-07	1	1	0.0582697	#DIV/0!	0.0582697
13199000	7302300	3618100	3978500	15546000	10702000	6905400	9551000	9275600	7846300	1	1	1	11246000	10249000	10494000	11449000	12399000	9	P61981	P61981	14-3-3 protein gamma;14-3-3 protein gamma, N-terminally processed	YWHAG	1	0.617863	1.02744	0.601363	1.66289	0.22909	0.186669	0.929835
2191000000	2286100000	2998100000	3244100000	2048300000	2129000000	1492500000	1372500000	1421900000	1373300000	1333200000	1444300000	1241700000	1336800000	1355100000	1355300000	1361300000	1341100000	20	P62081;B5MCP9	P62081;B5MCP9	40S ribosomal protein S7	RPS7	2	0.566418	0.536451	1.05586	0.947095	0.000417868	0.0322557	0.000246369
95882000	97556000	108650000	101810000	81316000	84896000	77906000	63703000	71397000	73688000	64669000	65697000	69481000	61869000	62287000	52849000	59475000	66542000	10	P62191;B4DR63	P62191;B4DR63	26S protease regulatory subunit 4	PSMC1	2	0.731543	0.653388	1.11962	0.893164	0.000343081	0.0490739	4.52967e-05
146260000	151130000	146190000	143050000	147510000	130880000	122520000	118230000	115760000	126590000	127570000	120180000	131920000	126820000	138170000	130670000	129140000	130440000	12	P62195;P62195-2;J3QQM1;J3QSA9;J3KRP2;J3QLH6;J3QRR3;J3QSE0;J3QRW1;Q8NB90;Q8NB90-2;Q8NB90-3	P62195;P62195-2;J3QQM1;J3QSA9;J3KRP2;J3QLH6	26S protease regulatory subunit 8	PSMC5	12	0.844894	0.909991	0.928464	1.07705	6.85303e-05	0.00342701	0.0026112
2731400000	2959400000	3724600000	3312800000	2665900000	2340400000	2054100000	2082500000	2036300000	1947500000	2276500000	2189200000	1466100000	1435700000	1702700000	1789500000	1686600000	1656600000	13	P62241;Q5JR95	P62241;Q5JR95	40S ribosomal protein S8	RPS8	2	0.709696	0.549054	1.29258	0.773647	0.00207268	8.35484e-05	8.58124e-05
2474100000	2527800000	2859100000	2868800000	1840400000	2105800000	998400000	930680000	1090300000	1098600000	1359800000	1271200000	750520000	666930000	617090000	788640000	815250000	840880000	11	P62244;I3L3P7;H3BN98;I3L246;H3BVC7;I3L303;H3BT37;H3BV27	P62244;I3L3P7;H3BN98;I3L246	40S ribosomal protein S15a	RPS15A	8	0.459865	0.305213	1.5067	0.663702	2.47829e-05	0.000525716	1.68804e-06
3722900000	4081000000	5082800000	4448500000	3142000000	3344000000	2064100000	2063800000	2388600000	2247100000	2635300000	2789300000	1455100000	1444600000	1495900000	1574700000	1750900000	1576800000	16	P62249;M0R210;M0R3H0;Q6IPX4;M0R1M5;M0QX76	P62249;M0R210;M0R3H0;Q6IPX4;M0R1M5	40S ribosomal protein S16	RPS16	6	0.595612	0.390325	1.52594	0.655333	0.000520722	9.76322e-05	1.06261e-05
332770000	367380000	203130000	183180000	734550000	731540000	586220000	602950000	488040000	498180000	413260000	299990000	1079500000	1076800000	659310000	614420000	675680000	671860000	17	P62258;P62258-2;I3L3T1;B4DJF2;K7EM20;K7EIT4;I3L0W5	P62258;P62258-2;I3L3T1;B4DJF2	14-3-3 protein epsilon	YWHAE	7	1.13167	1.87169	0.604625	1.65392	0.626275	0.0107752	0.0208825
1296500000	1363400000	1255200000	1426600000	944780000	943880000	1003200000	1054900000	1010400000	1032600000	1053000000	1060200000	733460000	646510000	890570000	937110000	974610000	856840000	9	P62263;E5RH77;H0YB22	P62263;E5RH77;H0YB22	40S ribosomal protein S14	RPS14	3	0.859473	0.696936	1.23322	0.810888	0.0784445	0.00382836	0.00445433
1040800000	1152400000	1382100000	1160300000	929860000	944250000	436800000	467040000	504140000	532510000	793390000	554770000	390320000	366950000	444610000	517490000	439650000	391090000	7	P62266;D6RD47;D6R9I7;D6RIX0;D6RDJ2	P62266;D6RD47	40S ribosomal protein S23	RPS23	5	0.497548	0.385813	1.28961	0.775428	7.77656e-05	0.0548505	2.96986e-06
3811400000	3590900000	4425500000	3992900000	3061300000	3490000000	1683400000	1727900000	1863300000	1931100000	2107000000	2136900000	1373600000	1386600000	1711800000	1498400000	1557700000	1654700000	21	P62269;J3JS69	P62269	40S ribosomal protein S18	RPS18	2	0.511783	0.41046	1.24685	0.802019	4.67173e-06	0.00267829	6.11772e-07
760250000	644300000	745170000	740570000	651500000	648330000	555040000	518860000	649640000	744720000	598270000	1003700000	380030000	196660000	383390000	440790000	384460000	547830000	4	P62273;P62273-2	P62273;P62273-2	40S ribosomal protein S29	RPS29	2	0.971387	0.556824	1.74451	0.573226	0.798112	0.00728335	0.000136388
2082700000	2348500000	3126400000	3181500000	2007800000	2097800000	1307900000	1246000000	1340500000	1188000000	1520700000	1539900000	1246500000	1156700000	1195400000	1089700000	1039600000	1055400000	14	P62277;J3KMX5;E9PS50	P62277;J3KMX5	40S ribosomal protein S13	RPS13	3	0.548546	0.456951	1.20045	0.833022	0.000621528	0.00743428	0.000126411
2628800000	2459300000	2775400000	2767700000	2271300000	2226100000	1244500000	1354500000	1412800000	1444100000	1548200000	1485000000	1091600000	1064700000	1199300000	1162700000	1133100000	1025400000	19	P62280;M0QZC5;M0R1H5;M0R1H6	P62280;M0QZC5	40S ribosomal protein S11	RPS11	4	0.561129	0.441336	1.27143	0.786514	1.21599e-06	0.000139059	7.59703e-08
57503000	38203000	65715000	77140000	63922000	46893000	27678000	25234000	26623000	23192000	28748000	24849000	25452000	37229000	37205000	25763000	36652000	35767000	3	P62304;A6NHK2	P62304;A6NHK2	Small nuclear ribonucleoprotein E	SNRPE	2	0.447438	0.566919	0.789244	1.26704	0.000233393	0.0190924	0.00218891
25818000	27588000	26997000	27616000	23662000	24724000	30319000	36437000	35277000	28196000	38694000	30262000	26735000	23640000	24947000	26532000	26581000	29580000	3	P62306;F8W0W6	P62306;F8W0W6	Small nuclear ribonucleoprotein F	SNRPF	2	1.27352	1.01029	1.26054	0.793308	0.00295217	0.00457819	0.803853
1	1	1	1	6030200	883450	1	8452400	1	1	1	1	14120000	11483000	1	1	11307000	7089600	3	P62310;REV__Q9Y4P9	P62310	U6 snRNA-associated Sm-like protein LSm3	LSM3	2	1.22257	6.36416	0.192102	5.20557	0.884411	0.0655015	0.0439345
1536000000	1773400000	1919300000	1421200000	900870000	835130000	351910000	323900000	447160000	312870000	508190000	342490000	247130000	315130000	256240000	282900000	254560000	257760000	4	P62314;J3QLI9;J3QLR7	P62314;J3QLI9	Small nuclear ribonucleoprotein Sm D1	SNRPD1	3	0.272662	0.192433	1.41692	0.705754	0.000263909	0.00765905	0.000103651
550180000	584260000	817140000	867690000	588000000	725690000	301910000	59366000	23452000	72250000	71089000	216940000	55784000	40954000	109950000	89308000	36496000	98904000	10	P62316;P62316-2;K7EJB5;K7ERG4	P62316;P62316-2;K7EJB5	Small nuclear ribonucleoprotein Sm D2	SNRPD2	4	0.18026	0.104379	1.72697	0.57905	1.20313e-05	0.287732	6.83135e-07
84608000	73003000	105300000	105380000	76638000	82145000	90625000	81683000	84777000	81746000	84455000	78979000	91366000	108430000	79105000	75322000	91240000	80709000	11	P62333;H0YJC0;H0YJS8;H0YJX2	P62333	26S protease regulatory subunit 10B	PSMC6	4	0.952931	0.998289	0.954564	1.0476	0.506576	0.46132	0.984607
1022600000	981480000	974080000	1081900000	938310000	861130000	1072200000	1094200000	983390000	1076900000	944410000	1064700000	968990000	944530000	975970000	968990000	1053700000	1047100000	16	P62424;Q5T8U3;Q5T8U2;REV__P50750-2;REV__P50750	P62424;Q5T8U3;Q5T8U2	60S ribosomal protein L7a	RPL7A	5	1.06422	1.01703	1.0464	0.955656	0.141548	0.16699	0.65217
24862000	27603000	25780000	32483000	11584000	12480000	1	1	1	14318000	1	1	5770200	5182100	1	1	1	5857500	2	P62699	P62699	Protein yippee-like 5	YPEL5	1	0.106223	0.124709	0.851765	1.17403	0.000761397	0.880681	0.000334944
4385000000	4035200000	5017100000	5055000000	3535100000	3708300000	2377000000	2581400000	2449200000	2749000000	2665400000	3111000000	1946600000	1888900000	2373400000	2273300000	2487200000	2522300000	34	P62701;A6NH36	P62701;A6NH36	40S ribosomal protein S4, X isoform	RPS4X	2	0.619101	0.524241	1.18095	0.846777	0.000190029	0.0245718	3.21957e-05
4303700	4787300	4616200	5372200	9066500	5899200	3584800	3777800	3902900	3956500	1	4173900	4042200	5058200	4882600	1	4329400	4451100	2	P62714;P67775;P67775-2;E7ESG8;H0YC23	P62714;P67775;P67775-2;E7ESG8;H0YC23	Serine/threonine-protein phosphatase 2A catalytic subunit beta isoform;Serine/threonine-protein phosphatase 2A catalytic subunit alpha isoform;Serine/threonine-protein phosphatase	PPP2CB;PPP2CA	5	0.569712	0.668628	0.852061	1.17362	0.030395	0.591132	0.105047
449760000	498670000	500070000	488460000	423920000	417190000	448260000	572220000	507850000	519860000	427100000	405280000	506770000	482870000	471240000	446470000	495570000	521750000	13	P62750;A8MUS3;K7ERT8;H7BY10;K7EJV9;K7EMA7	P62750;A8MUS3;K7ERT8;H7BY10;K7EJV9;K7EMA7	60S ribosomal protein L23a	RPL23A	6	1.0369	1.05277	0.984921	1.01531	0.584034	0.799576	0.224323
2301900000	2328700000	2735200000	2692000000	1891700000	1767000000	1285700000	1272500000	1362000000	1325300000	1424000000	1492700000	1005600000	979400000	1276600000	1077200000	1053500000	978150000	23	P62753;A2A3R5;A2A3R7;Q9Y253;B4DG64;Q9Y253-2;REV__Q9Y5R4	P62753;A2A3R5	40S ribosomal protein S6	RPS6	7	0.595064	0.464437	1.28126	0.780482	0.000238472	0.000409599	2.77724e-05
166890000	187590000	256910000	221270000	138160000	157820000	104320000	79290000	121980000	116710000	134100000	71617000	33610000	37320000	52503000	57249000	42390000	36263000	7	Q03393;E9PNN3;E9PJM0;E9PKY8	Q03393	6-pyruvoyl tetrahydrobiopterin synthase	PTS	4	0.556437	0.229777	2.42164	0.412943	0.00232986	0.000202881	1.35171e-05
275080000	256560000	243230000	260960000	246510000	239490000	279450000	250670000	254700000	248190000	273160000	242620000	231860000	265320000	258910000	260920000	286680000	274420000	8	P62829;J3KT29;C9JD32;B9ZVP7;J3KTJ3;J3QQT9	P62829;J3KT29;C9JD32;B9ZVP7	60S ribosomal protein L23	RPL23	6	1.01772	1.03698	0.981421	1.01893	0.59128	0.622378	0.33461
3609300	1	1	1	3484500	1	1144600000	1662600000	1907100000	2596400000	2759400000	2842500000	965270000	1376000000	2050800000	2334200000	2099900000	2187500000	7	P62837;P62837-2	P62837;P62837-2	Ubiquitin-conjugating enzyme E2 D2	UBE2D2	2	1820.26	1552.58	1.17242	0.85294	1.69435e-05	0.395643	8.31078e-06
499480000	404380000	498900000	479720000	389140000	422280000	295130000	302780000	260940000	284100000	331230000	321770000	210080000	247530000	253940000	277360000	277490000	278060000	11	K7ELC2;P62841;K7EQJ5;K7EJ78;K7EM56;S4R456;K7EPN6;REV__B4DHD0	K7ELC2;P62841;K7EQJ5;K7EJ78;K7EM56;S4R456	40S ribosomal protein S15	RPS15	8	0.666673	0.573317	1.16283	0.859968	6.24494e-05	0.0195465	8.20454e-06
1421000000	1321600000	1311900000	1384000000	984800000	1150400000	817550000	783030000	932420000	755570000	930810000	1070400000	474940000	533330000	754670000	699950000	710930000	436080000	10	P62847;P62847-4;P62847-3;E7ETK0;P62847-2	P62847;P62847-4;P62847-3;E7ETK0;P62847-2	40S ribosomal protein S24	RPS24	5	0.698441	0.476636	1.46535	0.682429	0.000987233	0.0035293	1.91033e-05
1834600000	2036300000	1928100000	2063200000	1099100000	1166700000	1170000000	998130000	993150000	880360000	1831800000	1143500000	471330000	684150000	1154200000	1055600000	916850000	819820000	10	P62851;E9PK60;E9PQK3	P62851	40S ribosomal protein S25	RPS25	3	0.692826	0.503747	1.37534	0.72709	0.045307	0.0942943	0.00225046
197090000	604550000	777830000	445980000	530150000	446940000	206560000	369850000	193860000	415540000	69260000	361420000	288670000	224360000	321880000	328290000	258550000	255630000	3	P62854;Q5JNZ5	P62854;Q5JNZ5	40S ribosomal protein S26;Putative 40S ribosomal protein S26-like 1	RPS26;RPS26P11	2	0.538374	0.558654	0.963699	1.03767	0.036821	0.86257	0.0208093
1350800000	1150300000	1125200000	1321400000	997450000	1084700000	842750000	840270000	865510000	814200000	937060000	849360000	653630000	894100000	802450000	726110000	748820000	700190000	8	P62857	P62857	40S ribosomal protein S28	RPS28	1	0.732469	0.643726	1.13786	0.878844	0.000334576	0.0224381	8.65879e-05
185220000	267100000	264510000	273450000	272470000	253670000	298470000	296530000	338030000	374020000	339590000	294430000	272580000	247910000	349770000	300320000	284900000	316500000	10	P62888;E5RI99;E5RJH3	P62888;E5RI99;E5RJH3	60S ribosomal protein L30	RPL30	3	1.28003	1.16853	1.09542	0.912888	0.00407103	0.181169	0.0593592
151080000	163920000	254680000	165060000	104440000	94558000	59137000	34187000	55842000	86592000	39777000	7535100	24375000	76610000	66055000	57259000	51022000	23028000	2	P62891;Q59GN2	P62891;Q59GN2	60S ribosomal protein L39;Putative 60S ribosomal protein L39-like 5	RPL39;RPL39P5	2	0.303158	0.319521	0.948788	1.05398	0.0018001	0.860353	0.00172527
438080000	396470000	367180000	365280000	303770000	315540000	417770000	459340000	461820000	496420000	455390000	526470000	468620000	376900000	489330000	437330000	366850000	411950000	7	P62899;B7Z4C8;P62899-2;P62899-3;B7Z4E3;C9JU56;H7C2W9;B8ZZK4	P62899;B7Z4C8;P62899-2;P62899-3;B7Z4E3;C9JU56;H7C2W9;B8ZZK4	60S ribosomal protein L31	RPL31	8	1.28856	1.16679	1.10436	0.905499	0.00207578	0.108885	0.059725
755330000	724640000	728020000	734560000	699190000	639570000	658460000	716230000	721570000	738840000	916720000	823070000	775910000	747750000	708430000	739710000	620350000	682690000	9	P62906	P62906	60S ribosomal protein L10a	RPL10A	1	1.06857	0.998489	1.07019	0.934414	0.26211	0.282124	0.970088
992670000	1139700000	974430000	1024100000	761790000	885780000	886960000	1199700000	1148300000	1022500000	1103800000	1007600000	998180000	993850000	1270000000	1281900000	871260000	924540000	10	P62913	P62913	60S ribosomal protein L11	RPL11	1	1.10217	1.09713	1.00459	0.995426	0.188357	0.95578	0.318191
1790500	2740900	2458700	2603300	2591500	2513900	3255600	3891100	3630700	1	4693400	1	3413900	2466600	1	1	1	1	10	P62913-2;Q5VVC8;Q5VVC9	P62913-2;Q5VVC8;Q5VVC9		RPL11	3	1.05252	0.400067	2.63086	0.380103	0.88256	0.158683	0.046334
663310000	782100000	735630000	814680000	714360000	635670000	702430000	831780000	805580000	758240000	757240000	711000000	636360000	721370000	633760000	699730000	837660000	845460000	15	P62917;E9PKU4;E9PKZ0;G3V1A1;E9PP36	P62917;E9PKU4;E9PKZ0;G3V1A1;E9PP36	60S ribosomal protein L8	RPL8	5	1.05074	1.00658	1.04388	0.957968	0.315311	0.47946	0.921824
485460000	438610000	181610000	165760000	1055200000	1391200000	876440000	759960000	492930000	532160000	155200000	192570000	1216900000	1533200000	1023200000	1017600000	698770000	699030000	12	P62937;Q567Q0;C9J5S7;F8WE65;F5H284;Q9Y536;A2BFH1;E5RIZ5	P62937;Q567Q0;C9J5S7;F8WE65	Peptidyl-prolyl cis-trans isomerase A;Peptidyl-prolyl cis-trans isomerase	PPIA	8	0.809411	1.6646	0.486251	2.05655	0.626239	0.0131737	0.118184
4843700	4570200	1	1	15678000	15528000	13737000	7698900	7124700	1	1	1	15550000	13198000	8171600	9299900	7269800	9413100	1	P62942	P62942	Peptidyl-prolyl cis-trans isomerase FKBP1A	FKBP1A	1	0.703118	1.54856	0.454046	2.20242	0.6025	0.0577628	0.273023
227210000	157640000	102340000	92940000	166850000	177120000	8104400000	8347700000	13684000000	14087000000	20115000000	17255000000	5001400000	5678900000	14605000000	12682000000	10232000000	10041000000	14	P62979;J3QTR3;P0CG48;F5H041;Q96C32;P0CG47;J3QKN0;F5GXK7;F5H747;F5H388;B4DV12;F5H265;F5H2Z3;F5GYU3;P62987;F5H6Q2;J3QS39;J3QRK5;J3QLP7;M0R1V7;M0R2S1;M0R1M6;F5GZ39;J3QSA3;K7EMA8;J3KSM4	P62979;J3QTR3;P0CG48;F5H041;Q96C32;P0CG47;J3QKN0;F5GXK7;F5H747;F5H388;B4DV12;F5H265;F5H2Z3;F5GYU3;P62987;F5H6Q2;J3QS39;J3QRK5;J3QLP7;M0R1V7;M0R2S1;M0R1M6;F5GZ39	Ubiquitin-40S ribosomal protein S27a;Ubiquitin;40S ribosomal protein S27a;Polyubiquitin-C;Ubiquitin;Polyubiquitin-B;Ubiquitin;Ubiquitin-60S ribosomal protein L40;Ubiquitin;60S ribosomal protein L40	RPS27A;UBC;UBB;UBA52	26	88.2947	63.0238	1.40097	0.71379	4.18613e-05	0.148532	0.000103727
2294800	2160000	2243900	2047100	3017400	2766200	4588900	5343400	1	4023900	1	1	5366100	4823900	5210200	1	1	5051900	2	P62993;P62993-2;J3KT38	P62993;P62993-2;J3KT38	Growth factor receptor-bound protein 2	GRB2	3	0.960549	1.40764	0.682385	1.46545	0.930338	0.489648	0.387114
169200000	148330000	134420000	151350000	68847000	57627000	32280000	37607000	31810000	19665000	38535000	39381000	16522000	18712000	17141000	19333000	29006000	19480000	8	P62995;P62995-3;H7BXF3;H7C2L4;P62995-2	P62995;P62995-3;H7BXF3	Transformer-2 protein homolog beta	TRA2B	5	0.273068	0.1647	1.65797	0.603147	0.00100964	0.0039489	0.000345766
124530000	117640000	80321000	58972000	270450000	268570000	306260000	308870000	221990000	251250000	117540000	112620000	545090000	561980000	321220000	302080000	376510000	383190000	15	E7EX29;P63104;E7ESK7;B0AZS6;P63104-2;E7EVZ2;E9PD24;E5RIR4;H0YB80;B7Z2E6;E5RGE1	E7EX29;P63104;E7ESK7;B0AZS6	14-3-3 protein zeta/delta	YWHAZ	11	1.43243	2.70518	0.529515	1.88852	0.232362	0.00716213	0.00132887
40987000	39140000	35510000	37051000	44707000	34196000	45684000	45800000	47014000	46230000	59659000	93833000	46224000	22924000	49484000	39712000	79586000	73325000	4	P63151-2;P63151;Q66LE6;E5RIY1;Q00005-7;Q00005-5;Q00005-4;Q00005-3;Q00005-2;Q00005;Q00005-6;E5RFR9	P63151-2;P63151;Q66LE6;E5RIY1	Serine/threonine-protein phosphatase 2A 55 kDa regulatory subunit B alpha isoform;Serine/threonine-protein phosphatase 2A 55 kDa regulatory subunit B delta isoform	PPP2R2A;PPP2R2D	12	1.46042	1.34399	1.08663	0.920274	0.0498379	0.708111	0.162541
33466000	26809000	43892000	55046000	51281000	36602000	83816000	75788000	88850000	79140000	69506000	78994000	71339000	90504000	105290000	84044000	88829000	87321000	5	P63167;F8VRV5;F8VXL2;Q96FJ2;F8VXI7	P63167;F8VRV5;F8VXL2	Dynein light chain 1, cytoplasmic	DYNLL1	5	1.92676	2.1341	0.902844	1.10761	2.44948e-05	0.133357	2.2584e-05
287440000	330850000	341870000	386150000	346810000	403940000	567770000	212170000	303110000	510510000	418440000	658820000	643310000	355350000	432600000	456210000	164820000	274930000	5	P63173;J3QL01;J3KT73;J3KSP2	P63173;J3QL01;J3KT73	60S ribosomal protein L38	RPL38	4	1.2736	1.10975	1.14764	0.87135	0.204235	0.563482	0.592034
1150000000	1251000000	1544700000	1372200000	1209300000	1182100000	770830000	776560000	823890000	858000000	575740000	665550000	575200000	524670000	756170000	710680000	541660000	538110000	7	P63220;Q8WVC2;Q9BYK1;Q9BYK2	P63220;Q8WVC2;Q9BYK1	40S ribosomal protein S21	RPS21	4	0.579893	0.472999	1.22599	0.815666	2.76312e-05	0.0429949	3.21298e-06
2864300000	3319500000	4626300000	4752400000	3324900000	3151300000	2383200000	2206500000	2220800000	2140200000	2002200000	2040500000	1679900000	1626700000	1850600000	1849600000	1942200000	1989700000	25	P63244;J3KPE3;D6RAC2;D6REE5;D6R9L0;D6R9Z1;D6RHH4;H0Y8W2;H0YAF8;H0YAM7;D6RFX4;D6RFZ9;D6RBD0;E9PD14;D6RAU2;H0Y8R5;D6R909;D6RF23;D6RGK8;D6RHJ5;H0Y9P0;D6RDI0	P63244;J3KPE3;D6RAC2;D6REE5;D6R9L0;D6R9Z1;D6RHH4;H0Y8W2;H0YAF8;H0YAM7;D6RFX4;D6RFZ9	Guanine nucleotide-binding protein subunit beta-2-like 1	GNB2L1	22	0.589572	0.496341	1.18784	0.841866	0.00111299	0.00177121	0.000248476
99724000	91896000	167900000	112530000	128880000	175580000	1353100	843420	809640	1	1	1	1017400	1282800	1194200	1662000	1	1051100	28	P63261;I3L4N8;I3L1U9;I3L3I0;J3KT65;I3L3R2;K7EM38	P63261;I3L4N8;I3L1U9;I3L3I0	Actin, cytoplasmic 2;Actin, cytoplasmic 2, N-terminally processed	ACTG1	7	0.00387138	0.0079941	0.484279	2.06492	4.23925e-06	0.135709	4.39971e-06
1	1	1	1	1	1	5088400	4819800	1	1	1	1	11607000	13253000	4810000	3940100	3792200	5593900	2	P15374;Q5TBK7	P15374;Q5TBK7	Ubiquitin carboxyl-terminal hydrolase isozyme L3	UCHL3	2	1.65137e+06	7.16603e+06	0.230444	4.33945	0.145126	0.0199618	0.00177695
157250000	170050000	156600000	173920000	183760000	185650000	174290000	184950000	177290000	170730000	148720000	150090000	267340000	206100000	173960000	157780000	216300000	205970000	8	P67809;H0Y449;C9J5V9;P16989-2;Q9Y2T7	P67809;H0Y449;C9J5V9	Nuclease-sensitive element-binding protein 1	YBX1	5	0.979401	1.19491	0.819642	1.22004	0.666727	0.0510847	0.068121
1	2832500	1	1	4289400	4715300	3951700	4408600	3896400	3424800	3593800	1	4654000	5299000	4365800	4487800	4798600	4512400	10	P67936;P67936-2;K7ENT6;K7ERG3;K7EP68;Q6ZN40;Q5TCU8;CON__Q3SX28;P07951;P07951-2;P09493;P09493-10;P09493-3;P09493-4;P09493-6;P09493-7;P09493-8;P09493-9;Q5TCU3;B7Z596;H0YL52;H0YK48;H7BYY1;P07951-3;F5H7S3;P09493-5;P09493-2;H0YNC7;H0YKP3;H0YKX5;H0YL80;K7EPB9;U3KQK2;K7EQW8	P67936;P67936-2;K7ENT6;K7ERG3;K7EP68;Q6ZN40;Q5TCU8;CON__Q3SX28;P07951;P07951-2;P09493;P09493-10;P09493-3;P09493-4;P09493-6;P09493-7;P09493-8;P09493-9;Q5TCU3;B7Z596;H0YL52;H0YK48;H7BYY1;P07951-3;F5H7S3;P09493-5;P09493-2;H0YNC7;H0YKP3;H0YKX5;H0YL80	Tropomyosin alpha-4 chain;Tropomyosin beta chain;Tropomyosin alpha-1 chain	TPM4;TPM1;TPM2	34	1.62837	2.37536	0.685524		0.41536	0.0624853	0.027028
839030000	709600000	1676500000	1198100000	1160000000	918250000	858530000	652020000	750860000	810090000	685540000	659600000	2036600000	1286400000	956620000	862360000	923300000	887490000	19	P68032;P68133;P62736;P63267;A6NL76;Q5T8M8;Q5T8M7;P63267-2;F6QUT6;F6UVQ4;C9JFL5;B8ZZJ2;F8WB63;C9JUM1;Q562R1;F8WCH0	P68032;P68133;P62736;P63267;A6NL76;Q5T8M8;Q5T8M7;P63267-2	Actin, alpha cardiac muscle 1;Actin, alpha skeletal muscle;Actin, aortic smooth muscle;Actin, gamma-enteric smooth muscle	ACTC1;ACTA1;ACTA2;ACTG2	16	0.679328	1.06941	0.635235	1.57422	0.037904	0.0501016	0.754463
4448000	10325000	6103000	6799900	28485000	21306000	93810000	99251000	49099000	61506000	48842000	77803000	138610000	223510000	68874000	65026000	106170000	77494000	5	P68036-3;P68036;P68036-2	P68036-3;P68036;P68036-2	Ubiquitin-conjugating enzyme E2 L3	UBE2L3	3	5.55477	8.77386	0.633105	1.57952	0.000134968	0.145946	0.00252263
1	1	1	1	3651500	1	58694000	47048000	55706000	56923000	72192000	68808000	85899000	102210000	150790000	186180000	150550000	163450000	7	O95551-2;O95551;O95551-3	O95551-2;O95551;O95551-3	Tyrosyl-DNA phosphodiesterase 2	TDP2	3	98.4172	229.79	0.428292	2.33485	2.43302e-08	0.00054198	4.39179e-06
2010100000	2129600000	1820200000	1944600000	2657100000	2834300000	3412700000	3131700000	3204000000	3232600000	3208600000	3257200000	5082900000	5434900000	4034600000	4236100000	3849800000	3645600000	28	P68363;CON__ENSEMBL:ENSBTAP00000016242;P68366;A8MUB1;F8VVB9;C9JDS9;F8VS66;F8VRZ4;C9JJQ8;C9JQ00;C9JEV8;F8VWV9;F8VX09;C9JDL2;F8VRK0;F8W0F6;F8VXZ7	P68363;CON__ENSEMBL:ENSBTAP00000016242;P68366;A8MUB1	Tubulin alpha-1B chain;Tubulin alpha-4A chain	TUBA1B;TUBA4A	17	1.4517	1.96209	0.739875		0.00224912	0.0114187	0.00317986
2095300000	2042200000	2064600000	2339800000	3165200000	3278700000	3819400000	3947800000	3721000000	4169500000	3988900000	4006400000	6341000000	6186900000	5385900000	4791100000	5052300000	5009900000	25	P68371;A8K854;Q3ZCM7;M0R2D3;M0QZL7;M0QY85;M0QYM7;M0QX14;M0QY37;M0R0X0;M0R042;M0R2T4	P68371	Tubulin beta-4B chain	TUBB4B	12	1.57836	2.18654	0.721852	1.38533	0.000138456	0.000244512	7.93325e-06
1	1	1	1	1	1	1	1	1	1	1	1	20613000	33423000	1	1	1	1	1	P68402;P68402-4;P68402-2;P68402-3	P68402;P68402-4;P68402-2;P68402-3	Platelet-activating factor acetylhydrolase IB subunit beta	PAFAH1B2	4	1	9.006e+06	1.11037e-07	9.006e+06	#DIV/0!	0.159867	0.159867
30705000	33428000	30747000	34388000	22670000	25993000	17501000	10814000	19829000	18612000	22918000	22528000	14753000	14622000	14291000	18254000	1	26728000	10	P78316;P78316-2;E9PFK5	P78316;P78316-2;E9PFK5	Nucleolar protein 14	NOP14	3	0.630593	0.498216	1.2657	0.790075	0.00166583	0.345122	0.00384049
1918800000	1788500000	2281000000	2289600000	1549500000	1824600000	2151400000	2263900000	2178900000	2126000000	1981900000	1944900000	2208000000	2255300000	2079600000	2008500000	2229000000	2271100000	45	P78371;P78371-2;F5GWF6;F8VQ14	P78371;P78371-2;F5GWF6;F8VQ14	T-complex protein 1 subunit beta	CCT2	4	1.08539	1.12011	0.969007	1.03198	0.228656	0.330886	0.0962278
1	1	1	1	2839700	3646900	1	2283500	1	1	1	1	19075000	1	1	1	2871800	2489000	2	P78417;P78417-2;P78417-3;Q5TA02;Q5TA01	P78417;P78417-2;P78417-3;Q5TA02;Q5TA01	Glutathione S-transferase omega-1	GSTO1	5	0.352034	3.76712	0.0934491	10.701	0.395726	0.257122	0.361119
29230000	37542000	78185000	30710000	36813000	52158000	41610000	36677000	37611000	39735000	44473000	28838000	49819000	51928000	45704000	44929000	54185000	47178000	10	P78527;P78527-2;E7EUY0	P78527;P78527-2;E7EUY0	DNA-dependent protein kinase catalytic subunit	PRKDC	3	0.865121	1.10998	0.779402	1.28303	0.468156	0.00222506	0.544099
103330000	101220000	72090000	67718000	156060000	165920000	299350000	277950000	253780000	229550000	224370000	226810000	456110000	435340000	288920000	312980000	384120000	333660000	11	P32119;A6NIW5;P32119-2	P32119	Peroxiredoxin-2	PRDX2	3	2.26883	3.31833	0.683727	1.46257	5.60225e-05	0.00333919	1.26829e-05
9658800	8725500	3374700	12302000	7041000	9704800	6590800	6781700	6140500	5551600	5048600	6055400	7564500	10089000	7873300	6726800	8127900	6319500	2	P82673;P82673-2	P82673;P82673-2	28S ribosomal protein S35, mitochondrial	MRPS35	2	0.711885	0.919188	0.774472	1.2912	0.0819896	0.0152734	0.622487
14946000	15641000	16609000	17928000	12165000	11595000	19137000	15799000	17385000	15768000	19729000	15488000	15566000	13426000	17155000	15865000	17199000	17185000	2	P82912;P82912-2;P82912-3;H0YL99	P82912;P82912-2;P82912-3;H0YL99	28S ribosomal protein S11, mitochondrial	MRPS11	4	1.16226	1.08451	1.07168	0.933111	0.0869352	0.261594	0.314783
209100000	214830000	50848000	85136000	3998500	1	17421000	23863000	8475900	24382000	32346000	20899000	7049000	1	5803200	1	14236000	22321000	8	Q93077;P04908;Q7L7L0	Q93077;P04908;Q7L7L0	Histone H2A type 1-C;Histone H2A type 1-B/E;Histone H2A type 3	HIST1H2AC;HIST1H2AB;HIST3H2A	3	0.225898	0.0876186	2.5782	0.387867	0.0960264	0.0223149	0.0557227
1269900000	1131500000	1667900000	1687100000	968710000	887040000	369330000	439680000	453480000	430330000	391660000	418200000	204420000	212100000	274020000	306510000	293720000	322700000	9	P84090;G3V279	P84090	Enhancer of rudimentary homolog	ERH	2	0.328774	0.21196	1.55112	0.644697	0.000123165	0.000104668	3.44772e-05
18277000000	18395000000	20378000000	21205000000	12193000000	12119000000	8848900000	8312200000	9226100000	9172700000	10065000000	9826700000	3412000000	3803600000	6236200000	6458200000	6118500000	6254900000	78	P98175-2;P98175;P98175-4;P98175-3;REV__P50747	P98175-2;P98175;P98175-4;P98175-3	RNA-binding protein 10	RBM10	5	0.540638	0.314754	1.71765	0.582191	0.000766712	0.000100446	4.76017e-05
29681000	21003000	11637000	11637000	19095000	22586000	40259000	38229000	20310000	20570000	48901000	52214000	46063000	46233000	30051000	28326000	30200000	25926000	2	P98179	P98179	Putative RNA-binding protein 3	RBM3	1	1.90665	1.78832	1.06617	0.937936	0.0189453	0.741328	0.00888908
536400000	491090000	527000000	474000000	606470000	546250000	641360000	661090000	592400000	629390000	473650000	566450000	1077900000	1090700000	858230000	923650000	973100000	948530000	40	Q00610;Q00610-2;J3KS13;P53675;P53675-2;J3KR87;J3KSQ2;K7EJJ5;J3QL20;F5H5N6;J3KRF5	Q00610;Q00610-2	Clathrin heavy chain 1	CLTC	11	1.12044	1.84587	0.606995	1.64746	0.0872987	8.33636e-06	7.78103e-07
80454000	82509000	39256000	43321000	157720000	142270000	180110000	156690000	119750000	162320000	93673000	63872000	450070000	430170000	316760000	293080000	247260000	214170000	16	P49411;H3BNU3	P49411	Elongation factor Tu, mitochondrial	TUFM	2	1.42323	3.57727	0.397853	2.51349	0.188269	0.00109854	0.000340544
1239100000	1306000000	1120700000	1118600000	849640000	796640000	757070000	815480000	784670000	833400000	820330000	822450000	692520000	633790000	683390000	729760000	771290000	778650000	26	Q00839;Q00839-2;Q5RI18	Q00839;Q00839-2	Heterogeneous nuclear ribonucleoprotein U	HNRNPU	3	0.751616	0.667021	1.12682	0.88745	0.0106429	0.00537487	0.00216713
54451000	46881000	90472000	85414000	101440000	85413000	71268000	103080000	98260000	88748000	67837000	42894000	85353000	113620000	32369000	91575000	61160000	35607000	4	Q01081;Q01081-2;Q01081-4;Q8WU68;Q8WU68-3	Q01081;Q01081-2;Q01081-4	Splicing factor U2AF 35 kDa subunit	U2AF1	5	1.01727	0.904353	1.12486	0.888997	0.918549	0.600247	0.65238
2313800000	2459600000	2828900000	2786100000	1719100000	1810400000	1284700000	1296200000	1430400000	1462800000	1544200000	1442400000	659650000	690800000	1001100000	981230000	1084500000	1029600000	98	Q01082;Q01082-2;Q01082-3;F8W6C1;P11277-2;P11277;P11277-3;Q9H254;Q9H254-4;M0QZQ3;C9JRP8;Q9H254-2;H0YJE6;Q8N4A0;F8VUJ3;Q86UT5;Q86UT5-2;E9PPZ1;Q86UT5-3;E9PJZ2	Q01082;Q01082-2;Q01082-3	Spectrin beta chain, brain 1	SPTBN1	20	0.607901	0.391358	1.55331	0.643786	0.00096428	0.000157475	4.62105e-05
11139000	16845000	9207400	1	25007000	16002000	12102000	16627000	14591000	13582000	1	1	43942000	33413000	32744000	24971000	18190000	19616000	4	P49755;G3V2K7	P49755	Transmembrane emp24 domain-containing protein 10	TMED10	2	0.727643	2.21068	0.329149	3.03814	0.458374	0.00324123	0.0134488
9799200	10419000	1	1	10300000	8496800	1	1	1	1	1	1	12912000	15003000	1	1	1	1	2	Q01469	Q01469	Fatty acid-binding protein, epidermal	FABP5	1	1.53787e-07	0.715494	2.14938e-07	4.6525e+06	0.0106232	0.146443	0.619516
17553000	7657500	5097000	5220500	9329000	15306000	8442300	10971000	6928400	8286700	22830000	1	26354000	14251000	8010000	8848400	11458000	11957000	5	Q01518;Q01518-2;Q5T0R9;Q5T0R1;Q5T0R2;Q5T0R3;Q5T0R4;Q5T0R5;Q5T0R6;Q5T0R7;Q5T0S3;Q5T0R8	Q01518;Q01518-2	Adenylyl cyclase-associated protein 1	CAP1	12	0.955045	1.34432	0.710429	1.4076	0.906194	0.363108	0.34379
1	1	1	1	1	1	1	1	1	1	1	1	1	1	1	1	1	1	3	Q01668-2;Q01668;Q01668-3;Q01668-4	Q01668-2;Q01668;Q01668-3;Q01668-4	Voltage-dependent L-type calcium channel subunit alpha-1D	CACNA1D	4	1	1	1	1	#DIV/0!	#DIV/0!	#DIV/0!
10562000	10406000	9547500	11022000	8538800	8873300	9043500	9756400	9265400	10167000	12052000	12995000	6561300	5925600	9396800	12338000	9466900	13333000	3	Q01780;Q01780-2;B4DKG8;K7EJ37	Q01780;Q01780-2	Exosome component 10	EXOSC10	4	1.07345	0.967294	1.10974	0.90111	0.371962	0.467101	0.806805
13692000	15443000	16188000	15740000	19539000	12037000	1	1	1	1	12151000	1	1	1	7654600	6498000	1	1	38	Q01804;Q01804-3;D6RI06;Q7RTX8;Q01804-2;Q01804-4;D6RA27	Q01804;Q01804-3	OTU domain-containing protein 4	OTUD4	7	0.131165	0.152772	0.85857	1.16473	0.000151206	0.897298	2.98914e-05
1	1	1	1	26207000	24863000	1	1	1	1	1	1	1	72948000	1	38523000	1	1	2	Q02750;P36507;Q02750-2;G5E9C7	Q02750;P36507;Q02750-2;G5E9C7	Dual specificity mitogen-activated protein kinase kinase 1;Dual specificity mitogen-activated protein kinase kinase 2	MAP2K1;MAP2K2	4	1.17486e-07	2.18271	5.38257e-08	1.85785e+07	0.145115	0.169965	0.478346
16590000	10524000	10262000	1	20584000	29957000	20784000	21451000	20146000	16412000	8496000	11269000	64587000	57756000	22334000	33279000	33792000	26944000	8	P53621-2;P53621	P53621-2;P53621	Coatomer subunit alpha;Xenin;Proxenin	COPA	2	1.12103	2.71497	0.412909	2.42184	0.715641	0.0100676	0.0118397
933840000	933290000	921740000	912630000	1041400000	920960000	927910000	911180000	895970000	932170000	912000000	1008000000	971040000	895980000	927450000	823660000	894860000	898060000	19	Q02878;U3KQR5;F8VZ45;F8VU16;F8VWR1;F8VZA3;F8VR69	Q02878	60S ribosomal protein L6	RPL6	7	0.98647	0.955364	1.03256	0.968467	0.628429	0.277088	0.162058
125280000	121980000	25441000	39316000	198270000	177180000	22119000000	21800000000	24311000000	25971000000	37628000000	35792000000	1000500000	1094300000	1319700000	1380800000	1312400000	1150600000	27	Q9NWT6;E9PL41;E9PNR8	Q9NWT6	Hypoxia-inducible factor 1-alpha inhibitor	HIF1AN	3	243.824	10.558	23.0937	0.0433019	1.9993e-06	2.88531e-06	1.67131e-08
107560000	116820000	135430000	120350000	125190000	115950000	146180000	169930000	128550000	132060000	129390000	136940000	168680000	154380000	156430000	162080000	169950000	188350000	18	Q04637-9;Q04637;Q04637-3;Q04637-4;Q04637-5;Q04637-6;Q04637-8;E7EUU4;E9PGM1;E7EX73;Q04637-7;C9JF13;C9J6B6;H7C044;O43432-3;O43432;Q504Z1;F5H564;F5H8J4;C9K073;C9J2Z7;H7C0V6	Q04637-9;Q04637;Q04637-3;Q04637-4;Q04637-5;Q04637-6;Q04637-8;E7EUU4;E9PGM1;E7EX73;Q04637-7	Eukaryotic translation initiation factor 4 gamma 1	EIF4G1	22	1.16879	1.38621	0.84316	1.18602	0.0223197	0.00960754	2.55045e-05
10167000	9840700	534300	4867600	15727000	38030000	17758000	17227000	7788500	8222200	9148200	1	24009000	23038000	13320000	13979000	11884000	10526000	3	Q04760;Q04760-2	Q04760;Q04760-2	Lactoylglutathione lyase	GLO1	2	0.759713	1.22218	0.621604	1.60874	0.611083	0.122685	0.630132
21570000	20380000	11621000	12041000	25921000	27488000	23904000	30845000	21190000	26472000	1	1	54849000	58780000	23168000	19020000	35536000	30619000	8	Q04917;A2IDB2;A2IDB1;F8WEB6	Q04917	14-3-3 protein eta	YWHAH	4	0.860445	1.86498	0.461369	2.16746	0.664547	0.0451466	0.039534
12618000	15578000	16736000	11786000	16684000	14035000	16623000	15857000	16097000	14912000	17449000	16171000	20368000	19961000	17392000	14803000	18068000	18218000	2	Q05519;Q05519-2;Q5T760;Q5T757;B4DTC1;B4DWT1;S4R3C4	Q05519;Q05519-2;Q5T760;Q5T757;B4DTC1;B4DWT1;S4R3C4	Serine/arginine-rich splicing factor 11	SRSF11;SFRS11	7	1.11062	1.24444	0.892464	1.12049	0.111261	0.0521867	0.0131126
881050000	609340000	616490000	599110000	1285800000	1182100000	2466900000	2347100000	2380600000	2294600000	2613500000	2398200000	3495100000	3823000000	2753700000	2922900000	2646600000	2670100000	18	Q06830;Q13162;H7C3T4	Q06830	Peroxiredoxin-1	PRDX1	3	2.80271	3.53919	0.791906	1.26278	4.00023e-07	0.0114919	3.24371e-06
84598000	73693000	40700000	49168000	46974000	68749000	47764000	43361000	53952000	63346000	38276000	24488000	91902000	134210000	90273000	80155000	164140000	159910000	5	Q07021;I3L3B0;I3L3Q7	Q07021;I3L3B0;I3L3Q7	Complement component 1 Q subcomponent-binding protein, mitochondrial	C1QBP	3	0.745261	1.98028	0.37634	2.65717	0.116074	0.000955488	0.00548569
13939000	9310300	9258800	8289200	13850000	11006000	22490000	21952000	20995000	21979000	23282000	20356000	25225000	24236000	23605000	22692000	22618000	23100000	5	Q07065	Q07065	Cytoskeleton-associated protein 4	CKAP4	1	1.99615	2.1549	0.926334	1.07952	1.54542e-06	0.0149972	3.73466e-07
63774000	60547000	54275000	52011000	72307000	67071000	100220000	94242000	103600000	110740000	112230000	94818000	112110000	96459000	93218000	90111000	98081000	89847000	7	Q07666;Q07666-2;Q07666-3;Q5VWX1;O75525;O75525-2;E5RJZ9;E5RG12	Q07666;Q07666-2	KH domain-containing, RNA-binding, signal transduction-associated protein 1	KHDRBS1	8	1.66453	1.56716	1.06213	0.941505	3.31517e-06	0.22212	1.87288e-05
8706000	8877400	4988900	4944700	5019800	5446200	4303500	1	3130500	3327000	3416200	2793200	3446200	4029600	2732500	1	1	1	5	Q08170;F6T1J1;B4DUA4;B4DJK0	Q08170	Serine/arginine-rich splicing factor 4	SRSF4	4	0.446789	0.26876	1.66241	0.601536	0.00527702	0.278948	0.00184863
278170000	263580000	274810000	293930000	225560000	242830000	185260000	191290000	185930000	218570000	194830000	192410000	161480000	162670000	168830000	165750000	191910000	191700000	30	Q08211;Q08211-2	Q08211	ATP-dependent RNA helicase A	DHX9	2	0.739949	0.660177	1.12083	0.892193	0.000130134	0.0209827	1.83092e-05
214860000	197850000	219110000	217720000	154860000	146750000	69256000	64066000	72371000	63453000	60463000	74464000	42400000	20721000	41276000	36606000	56372000	55195000	28	Q08378;Q08378-2;Q08378-4	Q08378;Q08378-2;Q08378-4	Golgin subfamily A member 3	GOLGA3	3	0.351017	0.219407	1.59985	0.62506	3.50145e-06	0.001469	1.12665e-06
1	1	1	1	1	1	1	1	1	1	1	1	1	1	1	1	1	1	1	Q08554;Q08554-2	Q08554;Q08554-2	Desmocollin-1	DSC1	2	1	1	1	1	#DIV/0!	#DIV/0!	#DIV/0!
36437000	35343000	26298000	24551000	19211000	17716000	46172000	31255000	18465000	16110000	18718000	21021000	44408000	65668000	14921000	15590000	38693000	23870000	7	Q08945	Q08945	FACT complex subunit SSRP1	SSRP1	1	0.95102	1.27322	0.746941	1.33879	0.823876	0.379272	0.421057
41102000	24613000	11946000	11746000	54679000	39529000	49439000	44485000	40668000	38422000	32261000	32424000	132610000	123700000	56071000	48804000	64319000	62834000	4	Q15056;Q15056-2	Q15056;Q15056-2	Eukaryotic translation initiation factor 4H	EIF4H	2	1.29455	2.65958	0.486751	2.05444	0.263644	0.0208882	0.0120348
159260000	162580000	179110000	194460000	219390000	190870000	200110000	203780000	175350000	181330000	166160000	204650000	259230000	257700000	202580000	184550000	258340000	295210000	9	Q09028;Q09028-3;Q09028-2;Q09028-4;H0YDK2;H0YF10;H0YCT5;B4DRT0;H0YEU5;E9PNS6;E9PIC4;E9PNS2	Q09028;Q09028-3;Q09028-2;Q09028-4;H0YDK2;H0YF10;H0YCT5	Histone-binding protein RBBP4	RBBP4	12	1.02325	1.3183	0.776188	1.28835	0.713356	0.0133057	0.0119617
613220000	682340000	722100000	705390000	927220000	987210000	549960000	580930000	646130000	649110000	1261100000	1696800000	470480000	559490000	860670000	961490000	544420000	505780000	1	Q0VFZ6	Q0VFZ6	Uncharacterized protein C2orf77	C2orf77	1	1.16098	0.841476	1.3797	0.724797	0.552226	0.268161	0.265935
5620800	7562500	3628000	4245700	1	1	1	1	1	1	1	1	1	1	1	1	1	1	2	Q12789;Q12789-3;H3BRD0	Q12789;Q12789-3;H3BRD0	General transcription factor 3C polypeptide 1	GTF3C1	3	2.84941e-07	2.84941e-07	1	1	0.0177935	#DIV/0!	0.0177935
122410000	141280000	150320000	165830000	138030000	114040000	80009000	101320000	104460000	109310000	94326000	89623000	98958000	84364000	93398000	99524000	102310000	97333000	11	Q12874;E7EUT8	Q12874;E7EUT8	Splicing factor 3A subunit 3	SF3A3	2	0.696046	0.692247	1.00549	0.994541	0.000739174	0.91973	0.000355728
29865000	38226000	39894000	45140000	33206000	24353000	35114000	32523000	30116000	27367000	37985000	29949000	35734000	15354000	29406000	28359000	6742500	25574000	4	Q12905	Q12905	Interleukin enhancer-binding factor 2	ILF2	1	0.91632	0.670053	1.36753	0.731244	0.41292	0.0894673	0.0533427
211250000	223280000	180910000	179670000	142910000	153320000	226540000	188360000	162420000	145680000	170960000	154900000	163990000	174680000	146960000	189290000	203800000	152160000	12	Q12906-7;Q12906;Q12906-3;Q12906-6;Q12906-2;Q12906-4;Q12906-5;K7EKJ9;K7ER69;K7EJ09;K7EM82;K7ENK6;K7ERM6;Q96SI9;Q96SI9-2;K7EQR9;K7EKY0	Q12906-7;Q12906;Q12906-3;Q12906-6;Q12906-2;Q12906-4;Q12906-5	Interleukin enhancer-binding factor 3	ILF3	17	0.961075	0.9446	1.01744	0.982858	0.694344	0.844805	0.53335
1	1	1	1	1	1	10366000	10790000	11008000	13761000	17705000	16741000	9817200	1	11038000	10943000	7928200	8574300	2	Q9NPF4;G3V282;G3V445	Q9NPF4;G3V282;G3V445	Probable tRNA threonylcarbamoyladenosine biosynthesis protein OSGEP	OSGEP	3	1.33952e+07	8.05012e+06	1.66397	0.600972	1.30489e-06	0.031419	0.000759196
6997300	7635500	3770800	3606000	2838700	3211600	2229300	2300700	2692400	2565200	3553000	3835900	1977600	1953200	2819700	2490000	2746500	2784000	3	Q13151	Q13151	Heterogeneous nuclear ribonucleoprotein A0	HNRNPA0	1	0.612137	0.52641	1.16285	0.859954	0.0694928	0.238265	0.0283265
6916200	7760900	6649000	7516000	4203500	3487600	11375000	20179000	12459000	11623000	4891200	14923000	15433000	15325000	14599000	16924000	22283000	20966000	2	Q13155;F8W950;A8MU58	Q13155;F8W950;A8MU58	Aminoacyl tRNA synthase complex-interacting multifunctional protein 2	AIMP2	3	2.06525	2.88861	0.714964	1.39867	0.013503	0.0661618	1.8473e-05
29836000	15207000	12882000	19859000	18454000	17922000	19495000	15147000	12015000	1	1	1	14788000	14209000	13999000	14585000	1	1	2	Q13185	Q13185	Chromobox protein homolog 3	CBX3	1	0.408698	0.504389	0.810285	1.23413	0.02657	0.70764	0.0348547
136230000	124580000	131900000	105600000	104620000	105720000	123030000	119880000	125690000	118360000	111140000	114140000	110490000	113730000	114260000	105670000	128470000	123080000	9	Q13200;E7EW34;E9PCS3;H7C2Q3;C9JPC0;H7C1H2	Q13200;E7EW34	26S proteasome non-ATPase regulatory subunit 2	PSMD2	6	1.00507	0.981726	1.02377	0.976777	0.92648	0.513976	0.758805
26532000	29928000	18132000	20884000	18590000	15765000	17615000	16174000	14738000	10406000	1	1	16355000	14300000	1	1	18168000	10412000	3	Q13243;Q13243-3	Q13243;Q13243-3	Serine/arginine-rich splicing factor 5	SRSF5	2	0.453921	0.456247	0.994902	1.00512	0.0135227	0.991547	0.0143618
208420000	213110000	183840000	171010000	136200000	136030000	57250000	76368000	59939000	61489000	58325000	70936000	47236000	44718000	53299000	46640000	72074000	78749000	8	Q13247;Q13247-3;Q13247-2	Q13247;Q13247-3	Serine/arginine-rich splicing factor 6	SRSF6	3	0.366492	0.326829	1.12136	0.891777	1.41069e-05	0.329006	1.40377e-05
202520000	213620000	207270000	174170000	180810000	181140000	268770000	221720000	198250000	262020000	180500000	245670000	267800000	257790000	275260000	227160000	274680000	255100000	15	Q13263;Q13263-2;M0R0K9;M0R2I3	Q13263;Q13263-2;M0R0K9	Transcription intermediary factor 1-beta	TRIM28	4	1.18749	1.34347	0.8839	1.13135	0.0467908	0.0931579	5.6285e-05
70075000	81390000	78535000	45634000	108620000	104690000	131200000	130030000	89099000	117730000	60609000	50676000	186160000	203090000	114520000	130450000	178630000	112360000	9	Q13283;F5H4D6;E5RJU8;E5RIZ6;Q5HYE9;E5RH42;E5RIF8;E5RI46;E5RH00;Q8N3K9;D6RGJ4;D6RBW8;D6RE13;D6RBR0;D6REX8;D6RBM9;D6R9A4;D6R9X5	Q13283;F5H4D6	Ras GTPase-activating protein-binding protein 1	G3BP1	18	1.18489	1.89226	0.626176	1.597	0.402761	0.0240185	0.00311521
850100000	804770000	1082900000	1033500000	902950000	882380000	737790000	808030000	1024700000	930990000	917220000	1004900000	607030000	508040000	760280000	679970000	732510000	688510000	18	Q13347;Q5TFK1	Q13347	Eukaryotic translation initiation factor 3 subunit I	EIF3I	2	0.97607	0.715607	1.36398	0.733151	0.734938	0.00221487	0.00109267
1	1	1	1	1	1	1	1	1	1	1	1	1	1	1	1	1	2643200	2	Q13405;E9PNF1;H0YDP7;E9PI78	Q13405;E9PNF1;H0YDP7;E9PI78	39S ribosomal protein L49, mitochondrial	MRPL49	4	1	440534	2.26997e-06	440534	#DIV/0!	0.340893	0.340893
1260900000	1143200000	1225600000	1149000000	701170000	740470000	621030000	614950000	588480000	640970000	760730000	742220000	426680000	387300000	580920000	551080000	540110000	553950000	35	Q13435;E9PPJ0;H0YCG1;E9PJ04;E9PJT3;H0YEX5;E9PIL8	Q13435;E9PPJ0	Splicing factor 3B subunit 2	SF3B2	7	0.637968	0.488726	1.30537	0.766066	0.00530626	0.00538366	0.000564664
37149000	33498000	29388000	27887000	4329300	27011000	25974000	46158000	1	22113000	1	1	27498000	18281000	25578000	24029000	22738000	19844000	4	Q13442;F8WBW6	Q13442	28 kDa heat- and acid-stable phosphoprotein	PDAP1	2	0.59176	0.866294	0.683093	1.46393	0.26069	0.378242	0.486768
608600000	589680000	654450000	617000000	456710000	443330000	318690000	333920000	371660000	374220000	420740000	441380000	176560000	146760000	256740000	247040000	285420000	296660000	45	Q13464;O75116;D6REE7;E9PF63;C9JFJ0;J3KRH6	Q13464	Rho-associated protein kinase 1	ROCK1	6	0.67085	0.418183	1.6042	0.623363	0.0011748	0.00110101	2.20573e-05
15170000	27533000	29203000	23882000	13842000	17725000	18966000	12840000	7371100	1	8697500	1	9366100	22404000	10787000	13225000	4274700	1	8	Q13547;Q5TEE2;F5GXM1	Q13547;Q5TEE2	Histone deacetylase 1	HDAC1	3	0.375915	0.47157	0.797155	1.25446	0.00815613	0.651514	0.0217423
13956000	1	17549000	1	9195000	19458000	16058000	15516000	17272000	18111000	19643000	21593000	13558000	11426000	13797000	15281000	12626000	24695000	2	Q13642-4;Q13642-5;Q13642-1;Q5JXI8;Q13642;Q5JXI2;Q5JXI3;Q5JXH7;Q5JXH8;Q13642-3;Q5JXH9;Q5JXI0	Q13642-4;Q13642-5;Q13642-1;Q5JXI8;Q13642;Q5JXI2;Q5JXI3;Q5JXH7;Q5JXH8;Q13642-3;Q5JXH9;Q5JXI0	Four and a half LIM domains protein 1	FHL1	12	1.79848	1.51905	1.18395	0.84463	0.0503708	0.226493	0.221719
1650700000	1666600000	2064200000	2005300000	1313800000	1378400000	875200000	868070000	950890000	891580000	1052700000	1008800000	498870000	506080000	712420000	730680000	757800000	717340000	69	Q13813;A6NG51;Q13813-2	Q13813;A6NG51;Q13813-2	Spectrin alpha chain, brain	SPTAN1	3	0.560298	0.389244	1.43945	0.694709	0.000206182	0.000541509	1.88168e-05
32185000	24304000	35601000	30653000	29552000	24760000	16920000	9393100	1	1	1	1	1	1	1	10898000	1	1	68	Q13813-3	Q13813-3			1	0.148615	0.0615515	2.41449	0.414166	2.57049e-05	0.474209	7.27269e-07
1	3482900	6643600	1	1	6638800	10786000	11794000	1	8598500	5715200	1	14883000	14118000	7640800	1	1	1	19	Q13885;Q9BVA1	Q13885;Q9BVA1	Tubulin beta-2A chain;Tubulin beta-2B chain	TUBB2A;TUBB2B	2	2.2006	2.18557	1.00687	0.993172	0.210614	0.990946	0.326237
39330000	26710000	79556000	22525000	23152000	67774000	24769000	21463000	19321000	21311000	17789000	21129000	13491000	10893000	16135000	19283000	19004000	20026000	7	Q13895;F8WBL2;H7BY94	Q13895	Bystin	BYSL	3	0.485557	0.381521	1.27268	0.78574	0.0528178	0.0299848	0.0254649
65937000	48880000	54461000	49630000	59616000	48695000	44375000	49896000	53603000	53537000	97089000	51735000	41181000	56570000	42637000	43671000	40141000	45421000	12	Q14008-3;Q14008;Q14008-2;H0YDX5;H0YEK7;H0YCF6;E9PQH5	Q14008-3;Q14008;Q14008-2	Cytoskeleton-associated protein 5	CKAP5	7	1.07034	0.823977	1.29899	0.769829	0.656623	0.134004	0.0289194
1	5361300	7149400	6099400	3691000	3152200	14075000	13932000	5305800	5314400	5787700	1	5468000	4783400	1	1	1	1	2	P01040;C9J0E4	P01040;C9J0E4	Cystatin-A	CSTA	2	1.74496	0.402753	4.33257	0.23081	0.233068	0.0464898	0.12308
155020000	128980000	74370000	71027000	154200000	141600000	137860000	179480000	104440000	139140000	79646000	66341000	311900000	246620000	148040000	148830000	189520000	175570000	12	Q14103;Q14103-3;H0Y8G5;Q14103-2;B4DTC3;Q14103-4;D6RAF8;H0YA96;D6RF44;D6RBQ9;D6RD83;F5H6R6	Q14103;Q14103-3;H0Y8G5;Q14103-2;B4DTC3;Q14103-4;D6RAF8;H0YA96;D6RF44;D6RBQ9	Heterogeneous nuclear ribonucleoprotein D0	HNRNPD	12	0.974779	1.68296	0.579204	1.72651	0.898742	0.0213669	0.0223648
6486300000	6501000000	7150900000	7134900000	4736600000	4650700000	3954900000	4270600000	4329800000	4245900000	4634600000	4992600000	2406900000	2280800000	3507700000	3449300000	3360700000	3291800000	120	Q14152;F5H335;Q96Q89-2;C9J6W2;Q96Q89;Q96Q89-3;Q96Q89-4;Q96Q89-5	Q14152;F5H335	Eukaryotic translation initiation factor 3 subunit A	EIF3A	8	0.720898	0.4991	1.4444	0.692331	0.00566028	0.0005151	0.000143803
1	1	1	1	3599600	5008700	5388900	4625800	4848500	4403500	1	3361600	9212700	9415600	4432500	4500800	5447700	5186900	2	Q14166	Q14166	Tubulin--tyrosine ligase-like protein 12	TTLL12	1	2.62866	4.43713	0.592423	1.68798	0.085477	0.0629265	0.00393615
113240000	106740000	83254000	100590000	94127000	92119000	130330000	144650000	144090000	147550000	120880000	105180000	140240000	180700000	139350000	142420000	159930000	149990000	27	Q14204;H0YJ21	Q14204	Cytoplasmic dynein 1 heavy chain 1	DYNC1H1	2	1.34337	1.54665	0.868567	1.15132	0.00194411	0.0602867	4.60692e-05
1	3795100	2767100	1	2190800	2362300	1936600	1	1	1	1	1	1	1	2862500	1928000	3207000	2094100	1	Q14244;Q14244-2;Q14244-3	Q14244;Q14244-2;Q14244-3	Ensconsin	MAP7	3	0.174229	0.907902	0.191903	5.21098	0.0556039	0.0635283	0.844159
41680000	32130000	25200000	29404000	40218000	44474000	40155000	60538000	39523000	74716000	43947000	117070000	53592000	37620000	54431000	52517000	47155000	45047000	8	Q14247-2;Q14247;Q14247-3;H7C314;B4E358;H0YCD9;H0YEV2	Q14247-2;Q14247;Q14247-3;H7C314	Src substrate cortactin	CTTN	7	1.76414	1.36252	1.29476	0.772344	0.0574389	0.281554	0.0105332
24011000	29935000	28331000	24335000	31726000	37323000	31186000	26153000	27638000	28696000	18977000	19494000	41388000	42062000	29594000	28687000	31534000	35113000	4	Q14444;Q14444-2;G3V153;E9PLA9;E9PP31	Q14444;Q14444-2;G3V153;E9PLA9;E9PP31	Caprin-1	CAPRIN1	5	0.866123	1.18625	0.730135	1.36961	0.204604	0.0138838	0.112988
214360000	209670000	219300000	233670000	196070000	167850000	218250000	239910000	293470000	269590000	406520000	458860000	133870000	149290000	238290000	234340000	250150000	250230000	13	Q14498;Q14498-2;Q14498-3;E1P5S2;G3XAC6;H0Y4X3;Q5QP23;Q5QP21;Q5QP22;Q86U06;Q86U06-2;Q86U06-5;Q86U06-4;Q86U06-3;G3XAP0;H0YJJ3;G3V5Z6;G3V546;A8MYG5;H0Y6I9;F2Z2Z5;F8WF24	Q14498;Q14498-2;Q14498-3;E1P5S2;G3XAC6;H0Y4X3	RNA-binding protein 39	RBM39	22	1.52032	1.01229	1.50187	0.665838	0.0239763	0.0416258	0.916289
1	2826300	1948600	1710200	2330400	2088300	1	1	1	1	1	1	1	1848400	1	1	1	1	4	Q14558-2;Q14558;B4DP31;C9J168;C9JNQ3	Q14558-2;Q14558;B4DP31;C9J168	Phosphoribosyl pyrophosphate synthase-associated protein 1	PRPSAP1	5	5.50267e-07	0.169519	3.24604e-06	308068	0.000982915	0.340893	0.0130773
11182000	12845000	10783000	5809700	13488000	16428000	18999000	24976000	14347000	19373000	13055000	7017700	37496000	23319000	19761000	18888000	27883000	30705000	7	Q14566	Q14566	DNA replication licensing factor MCM6	MCM6	1	1.38607	2.24074	0.618579	1.61661	0.150696	0.0262723	0.00115946
578610000	687330000	720430000	722850000	460710000	487600000	384950000	363320000	473810000	409690000	510280000	355800000	212990000	185270000	283200000	305130000	333760000	364630000	9	Q14681;J3QSC8	Q14681	BTB/POZ domain-containing protein KCTD2	KCTD2	2	0.682934	0.460688	1.48242	0.674572	0.00524528	0.00530223	0.000152156
2589100	2939800	1	1	1	1	3398100	3309700	1	1	1	1	3754200	1	1	3440800	1	1	2	Q14683;G8JLG1	Q14683;G8JLG1	Structural maintenance of chromosomes protein 1A	SMC1A	2	1.21322	1.30134	0.932286	1.07263	0.83473	0.939175	0.777938
17907000000	21914000000	25038000000	23629000000	15498000000	15226000000	10902000000	11508000000	12565000000	13382000000	12029000000	12450000000	3479500000	13950000000	10699000000	9165300000	9226200000	7971900000	32	Q14692	Q14692	Ribosome biogenesis protein BMS1 homolog	BMS1	1	0.610979	0.457101	1.33664	0.748145	0.00137189	0.0605908	0.00067331
1287600	1	1	1	3728900	3203500	3646700	4948600	4137700	3264200	4051700	1	8040400	7049000	5651800	6010000	6180100	6034000	2	Q14739;C9JXK0	Q14739;C9JXK0	Lamin-B receptor	LBR	2	2.43904	4.7403	0.514532	1.94351	0.075062	0.00265195	6.70267e-05
73691000	88696000	38297000	53209000	127900000	126490000	143100000	121870000	103920000	115320000	72302000	67281000	246400000	218700000	149010000	131930000	169470000	164420000	12	Q14974;B7ZAV6;J3KTM9;F5H4R7;J3QR48;J3QKQ5	Q14974;B7ZAV6;J3KTM9;F5H4R7;J3QR48	Importin subunit beta-1	KPNB1	6	1.22726	2.12466	0.577624	1.73123	0.343064	0.0053853	0.00224423
11682000	9067500	1	1	6697500	8275000	11870000	11733000	13941000	15347000	10097000	12440000	10092000	8029500	9787700	8794200	14918000	9980400	2	Q14978-2;Q14978-3;Q14978;Q96J17	Q14978-2;Q14978-3;Q14978;Q96J17	Nucleolar and coiled-body phosphoprotein 1	NOLC1	4	2.11153	1.72448	1.22444	0.816697	0.0111522	0.0925693	0.0812524
99953000	86992000	59019000	50844000	81044000	83145000	181650000	136650000	177500000	231110000	158120000	240830000	181520000	241050000	202020000	190140000	168710000	154380000	12	Q15046;Q15046-2;H3BPV7;J3KRL2;H3BRC9;H3BVA8	Q15046;Q15046-2	Lysine--tRNA ligase	KARS	6	2.44223	2.46817	0.989489	1.01062	0.000121305	0.92524	1.42582e-05
57351000	66312000	41219000	31989000	88821000	80869000	77996000	80545000	84492000	71869000	36192000	47989000	204690000	180420000	102710000	97595000	114170000	108330000	10	P12004	P12004	Proliferating cell nuclear antigen	PCNA	1	1.08872	2.20404	0.493967	2.02443	0.663519	0.00742868	0.00535141
197860000	224390000	225430000	235140000	207030000	173560000	79206000	88001000	97639000	83725000	74386000	89151000	30691000	50065000	53262000	66255000	65739000	60191000	13	Q15057;H7C3Q8;H7C3K3;H7C1E0	Q15057	Arf-GAP with coiled-coil, ANK repeat and PH domain-containing protein 2	ACAP2	4	0.405338	0.258193	1.56991	0.636981	1.64563e-07	0.000658643	4.59747e-08
40126000	54376000	14610000	21333000	158790000	165070000	206930000	199720000	198690000	208080000	130380000	142250000	389270000	462180000	234060000	247490000	283290000	285830000	12	Q15181;Q5SQT6	Q15181;Q5SQT6	Inorganic pyrophosphatase	PPA1	2	2.39057	4.18688	0.570968	1.75141	0.00722324	0.00608233	0.000374311
8610000000	8881700000	11772000000	11755000000	8962600000	8854900000	6405100000	6739700000	7464700000	8041200000	9494400000	9371500000	3368400000	3755200000	6161100000	6513000000	5760700000	5908700000	37	Q15208	Q15208	Serine/threonine-protein kinase 38	STK38	1	0.807608	0.534825	1.51004	0.662234	0.0437194	0.0056005	0.000253253
1411200000	1412800000	1626600000	1541600000	1206200000	1188600000	1166400000	1270500000	1226000000	1223600000	1155300000	1264300000	907500000	881550000	1065000000	1023900000	1054100000	1049800000	37	Q15233;Q15233-2;H7C367;C9JYS8;C9IZL7;C9J4X2;REV__A7E2Y1;REV__Q9Y2L8;C9JHW1;REV__F8WBD4;C9JJ13	Q15233;Q15233-2;H7C367;C9JYS8	Non-POU domain-containing octamer-binding protein	NONO	11	0.871122	0.713229	1.22138	0.818747	0.0357242	0.000187206	0.000476296
1	1	1	1	1	1	17694000	13654000	20887000	23175000	13070000	14701000	6273400	7054200	10563000	15502000	6886100	8696200	7	B7Z306;P51965-2	B7Z306;P51965-2			2	1.71968e+07	9.16248e+06	1.87687	0.532801	1.33538e-06	0.00449939	7.25051e-05
707040000	628820000	906050000	1040800000	520650000	525450000	389440000	365460000	320160000	334290000	495790000	590280000	363770000	347320000	283460000	326550000	405530000	285390000	36	Q15393;Q15393-3;Q15393-2;J3QL37;I3L4G7;J3QRB2;J3QKV4;H3BMB0	Q15393	Splicing factor 3B subunit 3	SF3B3	8	0.576468	0.464797	1.24026	0.806285	0.0100554	0.119053	0.00140944
93426000	99673000	108610000	111130000	68360000	75300000	53509000	46125000	58256000	58555000	69721000	47819000	28505000	23877000	38584000	36862000	42850000	51019000	5	Q15427;Q5SZ64	Q15427;Q5SZ64	Splicing factor 3B subunit 4	SF3B4	2	0.600154	0.398378	1.50649	0.663793	0.00090596	0.00552873	4.68832e-05
147860000	129540000	143840000	147830000	98429000	109770000	114920000	107660000	121750000	104710000	109880000	121060000	93918000	69278000	100810000	92026000	107500000	108370000	17	Q15459;E9PAW1;H7C1L2;F8WB66;F8WC79	Q15459;E9PAW1	Splicing factor 3A subunit 1	SF3A1	5	0.874832	0.735784	1.18898	0.841057	0.105148	0.0206355	0.00833337
12530000	14774000	10102000	11284000	19020000	21211000	23549000	23413000	23810000	22190000	26882000	25717000	35297000	40218000	32048000	31002000	32015000	25372000	3	Q15637-5;Q15637;Q15637-2;Q15637-3;Q15637-6;Q15637-4;Q15637-7;B4DX42;F8WEV5	Q15637-5;Q15637;Q15637-2;Q15637-3;Q15637-6;Q15637-4;Q15637-7;B4DX42	Splicing factor 1	SF1	9	1.63697	2.20366	0.74284	1.34618	0.000661753	0.00271855	6.08637e-05
9479100	3082000	3860600	1	10671000	10142000	25638000	29432000	23778000	1	1	5208400	54845000	54663000	13593000	14800000	9259200	12140000	3	Q15691	Q15691	Microtubule-associated protein RP/EB family member 1	MAPRE1	1	2.25747	4.27827	0.52766	1.89516	0.214203	0.262221	0.0500904
1162500000	1185900000	1329500000	1344600000	705930000	707410000	748250000	640120000	695080000	687680000	661190000	715290000	264190000	289970000	415950000	473430000	442290000	459010000	20	Q15750;Q15750-2	Q15750;Q15750-2	TGF-beta-activated kinase 1 and MAP3K7-binding protein 1	TAB1	2	0.644455	0.364341	1.76882	0.565347	0.010104	2.09718e-05	0.00028113
7042800	943990	3268400	1149100	20128000	6735000	4339700	1	10738000	1	780740	1	32092000	43106000	32968000	10793000	3689500	2722600	2	Q15843;E9PL57;S4R3E9;E9PS38;F8VSA6	Q15843;E9PL57;S4R3E9;E9PS38;F8VSA6	NEDD8	NEDD8;NEDD8-MDP1	5	0.403859	3.19276	0.126492	7.90564	0.279215	0.0308813	0.0895834
1970400	2602600	2078500	2097700	2660500	2466600	3577800	4199800	4173900	4474700	3951700	4192500	3810500	3597100	4394300	4661100	4291500	4430000	1	Q16186	Q16186	Proteasomal ubiquitin receptor ADRM1	ADRM1	1	1.77067	1.81493	0.975616	1.02499	1.25897e-06	0.631706	3.57738e-06
8858500	8759200	8951900	7664200	8314300	9631600	8644900	8549300	10280000	9339700	10172000	12128000	6599800	3697200	8115500	7468000	6447900	7964800	2	Q16514;Q16514-2	Q16514;Q16514-2	Transcription initiation factor TFIID subunit 12	TAF12	2	1.13289	0.772201	1.46709	0.68162	0.0861865	0.00446704	0.0201522
60154000	61062000	40184000	49862000	69736000	67613000	109790000	103420000	96620000	97030000	94945000	99244000	126200000	135910000	102510000	94126000	116940000	105290000	10	Q16543;K7EQA9;K7EKQ2;K7EL68;K7EIU0	Q16543;K7EQA9;K7EKQ2;K7EL68	Hsp90 co-chaperone Cdc37	CDC37	5	1.72413	1.9534	0.882629	1.13298	9.04685e-06	0.0790639	3.61572e-05
133380000	128890000	71749000	82059000	253010000	263590000	431220000	434350000	374000000	371650000	280320000	279630000	763380000	570830000	503510000	461280000	488560000	440210000	15	O43175;Q5SZU1	O43175;Q5SZU1	D-3-phosphoglycerate dehydrogenase	PHGDH	2	2.32789	3.46075	0.672653	1.48665	0.000875811	0.0106048	7.41736e-05
1177900000	1201200000	1499800000	1509300000	1027900000	1031700000	428450000	347750000	400120000	403680000	453780000	412680000	273420000	220810000	386020000	427270000	382480000	444130000	36	Q2NL82;I3L1Q5;I3L4E8	Q2NL82	Pre-rRNA-processing protein TSR1 homolog	TSR1	3	0.328481	0.286545	1.14635	0.872334	3.02041e-06	0.212292	3.14271e-06
1	1	18643000	1	1	1	1	1	1	1	1	1	1	1	1	1	1	1	2	Q2TAY7	Q2TAY7	WD40 repeat-containing protein SMU1	SMU1	1	3.21837e-07	3.21837e-07	1	1	0.340893	#DIV/0!	0.340893
148690000	163770000	178870000	177130000	85425000	100630000	68732000	74410000	71301000	70529000	86433000	84791000	23335000	34923000	57938000	59740000	56757000	66030000	23	Q3V6T2;Q3V6T2-2;Q3V6T2-3;Q3V6T2-4;Q3V6T2-5;H7C2C6;H0Y470;H0Y7U8;C9J225	Q3V6T2;Q3V6T2-2;Q3V6T2-3;Q3V6T2-4;Q3V6T2-5;H7C2C6	Girdin	CCDC88A	9	0.533865	0.349582	1.52715	0.654813	0.00257116	0.00577753	0.000385962
9033600	6148700	1	7049000	6227300	1	1	1	1	1	1	1	1	1	1	1	1	1	2	Q52LJ0-2;Q52LJ0	Q52LJ0-2;Q52LJ0	Protein FAM98B	FAM98B	2	2.10833e-07	2.10833e-07	1	1	0.0124045	#DIV/0!	0.0124045
58876000	57831000	64959000	47295000	26801000	36609000	32918000	33707000	26342000	34288000	31152000	31999000	14528000	17499000	26197000	28055000	28692000	32242000	7	Q53EL6;Q53EL6-2;Q5VZS7	Q53EL6;Q53EL6-2	Programmed cell death protein 4	PDCD4	3	0.651248	0.503514	1.2934	0.773153	0.0194193	0.0410044	0.00448777
3012700	2098500	1200200	1	4766000	4354900	9265500	11860000	11146000	9037000	12185000	20165000	16285000	11921000	12642000	5344900	14053000	22210000	3	Q53GQ0;E9PI21	Q53GQ0	Estradiol 17-beta-dehydrogenase 12	HSD17B12	2	4.77301	5.34307	0.893308	1.11943	0.000342048	0.612935	0.000854934
7055200	7316500	1	1	22807000	4715200	14567000	10431000	7353600	8345700	4856000	5746500	39660000	35413000	13793000	13546000	17823000	19085000	6	P41250	P41250	Glycine--tRNA ligase	GARS	1	1.22452	3.32554	0.368216	2.7158	0.682639	0.0130107	0.0184332
189070000	169320000	204380000	198930000	97665000	122120000	82971000	67868000	54079000	66276000	77701000	87011000	32412000	33374000	53308000	51606000	44026000	45638000	16	Q5JSZ5;Q5JSZ5-5;H0Y412;Q5JSZ9;Q5JT00	Q5JSZ5;Q5JSZ5-5	Protein PRRC2B	PRRC2B	5	0.444129	0.265276	1.67422	0.597294	0.000640052	0.000781909	6.34699e-05
48548000	37968000	41881000	37979000	30300000	38105000	24128000	20719000	20847000	21736000	23017000	26247000	11899000	15150000	17925000	19585000	18653000	20974000	8	Q5JTH9;Q5JTH9-3;Q5JTH9-2;F5H456	Q5JTH9;Q5JTH9-3;Q5JTH9-2;F5H456	RRP12-like protein	RRP12	4	0.582219	0.443758	1.31202	0.762184	8.71662e-05	0.00715643	1.44339e-05
204710000	185260000	115530000	121750000	90054000	98373000	200130000	198250000	261460000	240640000	281120000	342410000	208870000	155530000	89111000	103510000	64359000	67439000	4	P81605-2;P81605	P81605-2;P81605	Dermcidin;Survival-promoting peptide;DCD-1	DCD	2	1.8684	0.844475	2.2125	0.451978	0.00250605	0.00146925	0.499967
9380900	10304000	10343000	9170900	15426000	14924000	15482000	16452000	17811000	14745000	24461000	23474000	8439800	9592600	14528000	16323000	17175000	15842000	2	Q5RKV6	Q5RKV6	Exosome complex component MTR3	EXOSC6	1	1.61649	1.1776	1.3727	0.728489	0.00606981	0.0501021	0.304508
172670000	165500000	195400000	230230000	129830000	165040000	100840000	70154000	93523000	94234000	221250000	102070000	58160000	67253000	76302000	58930000	38740000	47126000	9	Q5SWX8;Q5SWX8-4;Q5SWX8-3;Q5SWX8-2	Q5SWX8;Q5SWX8-4;Q5SWX8-3;Q5SWX8-2	Protein odr-4 homolog	ODR4	4	0.644272	0.327308	1.9684	0.508028	0.036276	0.0334691	1.17414e-05
6408800	17473000	8338600	10409000	8380600	8503000	13402000	13881000	14914000	18121000	15587000	18013000	16124000	10695000	15115000	12486000	13698000	13725000	3	Q5T8P6;Q5T8P6-2;Q5T8P6-3;Q5T8P6-4;Q5T8P6-5;E2PSN0	Q5T8P6;Q5T8P6-2;Q5T8P6-3;Q5T8P6-4;Q5T8P6-5	RNA-binding protein 26	RBM26	6	1.57811	1.37521	1.14754	0.87143	0.00964795	0.107136	0.0628125
1901000	2917900	2248900	1972400	7591700	7883300	4490300	6835100	7438300	6934900	2747700	3448300	9711500	10533000	5608200	7921000	7123700	8685400	5	Q9Y490;Q5TCU6	Q9Y490;Q5TCU6	Talin-1	TLN1	2	1.30101	2.02253	0.643259	1.55458	0.408203	0.0227869	0.012417
4867900	4746000	4911300	4663500	13747000	9924600	13879000	12693000	12229000	9523700	15643000	13625000	14370000	14712000	14537000	14931000	13425000	18347000	4	Q5TDF0;Q9BSD7	Q5TDF0;Q9BSD7	Cancer-related nucleoside-triphosphatase	C1orf57;NTPCR	2	1.81036	2.10736	0.859068	1.16405	0.00850001	0.0788353	0.000943652
11414000	14698000	16030000	14323000	6549700	7039300	9864600	11322000	7468200	9355200	8128500	7546800	3698800	3579300	5772900	5191700	5720200	7007400	4	Q5UIP0;Q5UIP0-2;H7C2B5;H7BZN3;B4DS49	Q5UIP0;Q5UIP0-2;H7C2B5	Telomere-associated protein RIF1	RIF1	5	0.766342	0.442092	1.73344	0.576886	0.155101	0.000960444	0.00393481
5233700	3713600	3354100	3177400	2991400	2970900	1	1	1	1	1	1	1	1	1	1	1	1	2	Q5VTL8;Q5VTL8-2	Q5VTL8;Q5VTL8-2	Pre-mRNA-splicing factor 38B	PRPF38B	2	2.79836e-07	2.79836e-07	1	1	1.32639e-06	#DIV/0!	1.32639e-06
7971700	6461300	11945000	10385000	7940900	8745700	9792800	9486800	17314000	8453800	8880700	8396800	10270000	10747000	9485500	10355000	11744000	9714400	4	Q5VTR2;C9JXC9;C9J0A5;C9JWJ4	Q5VTR2	E3 ubiquitin-protein ligase BRE1A	RNF20	4	1.16605	1.16588	1.00014	0.999856	0.381546	0.99919	0.118615
1	1	1	1	1	1	1	1	1	1	1	1	1	1	1	1	1	1	9	Q5VU63;K7EMU5;K7EPV9;K7ELJ3	Q5VU63		TPM3	4	1	1	1	1	#DIV/0!	#DIV/0!	#DIV/0!
12949000	16061000	1	16491000	12090000	1	1	1	1	1	1	1	1	1	1	1	1	1	2	Q5VWN6;Q5VWN6-2	Q5VWN6;Q5VWN6-2	Protein FAM208B	FAM208B	2	1.04183e-07	1.04183e-07	1	1	0.0115996	#DIV/0!	0.0115996
527350000	561190000	492730000	504960000	409710000	342810000	270670000	298650000	310990000	279160000	319440000	341720000	118430000	120200000	209060000	187320000	204010000	213640000	21	Q5W0B1	Q5W0B1	RING finger protein 219	RNF219	1	0.641349	0.370818	1.72955	0.578184	0.000660768	0.000119435	1.36212e-05
4433100	2977300	5489800	1	3154400	3078400	1	1	1	1	1	1	1	1	1	1	1	1	2	Q6P158;H7C109;Q6P158-2;F8WAZ3;Q6P158-3	Q6P158;H7C109;Q6P158-2;F8WAZ3;Q6P158-3	Putative ATP-dependent RNA helicase DHX57	DHX57	5	3.13594e-07	3.13594e-07	1	1	0.00175073	#DIV/0!	0.00175073
10627000	13783000	12445000	15105000	17769000	2349300	14189000	12504000	11584000	12480000	14253000	14169000	10162000	13387000	12519000	11318000	12173000	11432000	2	Q6P1L8	Q6P1L8	39S ribosomal protein L14, mitochondrial	MRPL14	1	1.09851	0.984915	1.11534	0.896589	0.605748	0.0637281	0.936485
1626400	1599500	1	1	3978700	1	9185300	12496000	10188000	11142000	12685000	9435400	13123000	9592100	12421000	11818000	9730300	9985500	1	Q6P1M0;Q96G53	Q6P1M0;Q96G53	Long-chain fatty acid transport protein 4	SLC27A4	2	9.04029	9.25379	0.976928	1.02362	7.49149e-07	0.776215	6.31176e-07
131620000	119910000	134030000	141020000	89213000	83883000	67718000	66965000	55585000	56492000	72385000	73701000	47211000	42042000	59361000	62281000	54099000	47965000	17	Q6P2Q9;I3L0J9;I3L3Z8;I3L1T8	Q6P2Q9	Pre-mRNA-processing-splicing factor 8	PRPF8	4	0.561468	0.447291	1.25526	0.796646	0.000616719	0.0140913	0.000103702
97876000	101750000	114670000	123290000	92240000	69965000	85140000	74509000	78871000	72868000	61348000	62040000	54364000	55929000	79072000	75103000	82650000	51298000	14	Q6PKG0;Q6PKG0-3;E5RH50;H0YBW1;H0YC33;H0YAN4;E5RHK4;H0YC73	Q6PKG0;Q6PKG0-3;E5RH50	La-related protein 1	LARP1	8	0.724879	0.664258	1.09126	0.916371	0.00891697	0.39929	0.00543817
164660000	154470000	168920000	167050000	124310000	131070000	117280000	193820000	178920000	191540000	219790000	225700000	102220000	118350000	158350000	148790000	177390000	188630000	22	Q6UB35;H0Y327;Q5JYA8;Q6UB35-2;Q4VXM0;Q5JYA4;Q5JYA5;Q5JYA3;Q4VXM1;H0Y2S0	Q6UB35	Monofunctional C1-tetrahydrofolate synthase, mitochondrial	MTHFD1L	10	1.23786	0.981603	1.26106	0.792982	0.0693154	0.0929548	0.863156
10043000	10129000	11955000	10291000	8669400	8477500	5389600	1	1	1	1	1	1	1	1	1	1	1	3	Q6UN15;Q6UN15-5;Q6UN15-3;Q6UN15-4	Q6UN15;Q6UN15-5;Q6UN15-3;Q6UN15-4	Pre-mRNA 3-end-processing factor FIP1	FIP1L1	4	0.0904829	1.0073e-07	898268	1.11325e-06	5.51082e-06	0.340893	3.12368e-09
1	1	1	527310000	1	1	1	1	1	1	1	1	1	1	8167600	1	7706000	1	1	Q6ZRR7	Q6ZRR7	Leucine-rich repeat-containing protein 9	LRRC9	1	1.13785e-08	0.030103	3.77986e-07	2.6456e+06	0.340893	0.145156	0.355055
52207000	50564000	66141000	73153000	31966000	38396000	25452000	26056000	29517000	25191000	37903000	28529000	13358000	18636000	16670000	19021000	16863000	16647000	4	Q70IA6-3;Q70IA6;Q70IA6-2	Q70IA6-3;Q70IA6;Q70IA6-2	MOB kinase activator 2	MOB2	3	0.552603	0.3239	1.70609	0.586135	0.00600721	0.00022581	0.000284546
1	4576200	9653500	5471800	6753800	6206200	4164900	3174200	2656800	3773100	2684700	2211600	3281500	5974500	3563000	1	4813400	4080800	2	Q71RC2-4;Q71RC2;Q71RC2-3;Q71RC2-5;Q71RC2-6;Q71RC2-2;Q71RC2-7;Q96J85;F8VY40;F8W1I4	Q71RC2-4;Q71RC2;Q71RC2-3;Q71RC2-5;Q71RC2-6;Q71RC2-2;Q71RC2-7;Q96J85;F8VY40;F8W1I4	La-related protein 4	LARP4	10	0.571477	0.664795	0.859629	1.16329	0.110249	0.575889	0.262393
12822000	10633000	27149000	10116000	23717000	52735000	76696000	1	1	1	1	1	56024000	84161000	1	92964000	1	138360000	27	Q71U36;Q71U36-2;Q13748;Q13748-2;Q6PEY2;F8VQQ4	Q71U36;Q71U36-2;Q13748;Q13748-2;Q6PEY2	Tubulin alpha-1A chain;Tubulin alpha-3C/D chain;Tubulin alpha-3E chain	TUBA1A;TUBA3C;TUBA3E	6	0.559123	2.70834	0.206445	4.84392	0.500097	0.0855596	0.125058
9605200	1	1	1	8987100	2889300	9947800	10399000	9668500	10715000	12415000	12362000	10345000	15829000	14018000	13214000	11010000	10644000	3	Q75MJ1;Q9UG63;C9JZV3;C9JHK9	Q75MJ1;Q9UG63	ATP-binding cassette sub-family F member 2	ABCF2	4	3.04946	3.49415	0.872732	1.14583	0.00346142	0.150382	0.00153272
73834000	68087000	80108000	65549000	102540000	110700000	76146000	74663000	83476000	80533000	73825000	67421000	143800000	74820000	82066000	88850000	70617000	99490000	14	Q7KZF4;H7C597	Q7KZF4	Staphylococcal nuclease domain-containing protein 1	SND1	2	0.910638	1.11746	0.81492	1.22712	0.373544	0.153465	0.480015
100460000	86479000	100940000	100830000	54276000	81775000	89573000	85275000	108150000	90903000	157920000	118620000	85702000	79560000	96694000	96956000	95124000	90857000	18	Q7L014;D6RJA6;H0Y9U3	Q7L014	Probable ATP-dependent RNA helicase DDX46	DDX46	3	1.2395	1.03837	1.1937	0.837729	0.150062	0.158424	0.682802
455180000	431470000	776820000	563640000	467800000	388790000	248860000	196340000	254490000	220590000	239660000	262640000	119000000	171930000	229820000	238860000	286710000	246000000	14	Q7L2H7;B4E2Q4;J3KNJ2;H0YCQ8;E9PN86;E9PRY0;E7ESM3;E9PRI2	Q7L2H7;B4E2Q4;J3KNJ2	Eukaryotic translation initiation factor 3 subunit M	EIF3M	8	0.461322	0.419081	1.1008	0.908434	0.000800749	0.430978	0.00075824
17062000	20368000	20520000	18413000	19570000	17022000	14322000	9666400	11822000	14553000	14066000	13182000	11697000	12024000	9974600	11690000	9027500	12965000	4	Q7L9L4-2;Q7L9L4;Q9H8S9;H7BZ12;Q9H8S9-2;D6RCK3	Q7L9L4-2;Q7L9L4;Q9H8S9;H7BZ12;Q9H8S9-2;D6RCK3	MOB kinase activator 1B;MOB kinase activator 1A	MOB1B;MOB1A	6	0.6871	0.596504	1.15188	0.868147	0.000155877	0.109616	5.56844e-06
108870000	113540000	125510000	124180000	87366000	78632000	85985000	108130000	94914000	96652000	115570000	112290000	37601000	25504000	68525000	54400000	92112000	69264000	3	Q7RTV0	Q7RTV0	PHD finger-like domain-containing protein 5A	PHF5A	1	0.961515	0.54444	1.76606	0.566231	0.665582	0.00222069	0.00322768
339650000	356090000	579470000	557660000	354350000	460840000	66589000	72407000	65307000	65390000	148620000	81968000	23266000	27007000	48750000	54546000	64312000	51624000	19	Q7Z353;Q7Z353-2;E2QRN0	Q7Z353;Q7Z353-2	Highly divergent homeobox	HDX	3	0.188924	0.101775	1.8563	0.538707	1.49865e-05	0.0270667	4.56243e-06
14297000	5811900	4407700	4162300	4294600	5890800	1708400	1	4144500	4104400	33457000	9845600	1	1	2083200	2297500	1	1	2	Q7Z3E2;H0Y7V5;F6VCB7	Q7Z3E2;H0Y7V5;F6VCB7	Uncharacterized protein C10orf118	C10orf118	3	1.37041	0.112718	12.1578	0.0822514	0.663043	0.142773	0.00612004
5224600	4304200	4142600	3761600	3089400	3638200	5081300	5547000	6244800	7151700	7463300	7049700	4363800	5433600	7180500	5660400	7693900	9572600	3	Q7Z417;A1L3A6	Q7Z417	Nuclear fragile X mental retardation-interacting protein 2	NUFIP2	2	1.59507	1.65165	0.965743	1.03547	0.000641077	0.79652	0.00955698
156220000	136230000	145900000	178500000	84005000	81047000	50884000	27213000	53479000	30668000	31391000	27775000	8628800	9824900	26536000	28457000	25515000	32897000	16	Q7Z478;H0Y8L1	Q7Z478	ATP-dependent RNA helicase DHX29	DHX29	2	0.283168	0.168638	1.67915	0.595541	0.000250874	0.0424653	6.99354e-05
48292000	49742000	37859000	39557000	35080000	25334000	13356000	12082000	13367000	13651000	10976000	12741000	9461300	7021100	8852900	10911000	12204000	11843000	4	Q86U42;Q86U42-2;Q92843-2;G3V4T2;B4DEH8;H0YJH9	Q86U42;Q86U42-2;Q92843-2;G3V4T2;B4DEH8;H0YJH9	Polyadenylate-binding protein 2	PABPN1	6	0.322953	0.255627	1.26337	0.791531	2.92891e-05	0.0153618	1.50279e-05
1	2919700	1767700	2490000	1287100	2447800	3141300	3168400	1	1	1	1	3698100	3084500	3559600	2878100	3438400	4114500	2	Q86UP2;Q86UP2-3;Q86UP2-2	Q86UP2;Q86UP2-3;Q86UP2-2	Kinectin	KTN1	3	0.578219	1.90365	0.303743	3.29226	0.356883	0.00574459	0.00575621
349650000	333830000	226650000	279260000	257610000	213390000	124030000	113640000	97736000	89293000	124740000	123150000	129840000	116550000	118050000	101750000	107660000	101520000	7	E9PB61;Q86V81	E9PB61;Q86V81	THO complex subunit 4	ALYREF	2	0.405079	0.406754	0.995882	1.00413	3.74243e-05	0.952945	3.32819e-05
6872100	7331400	7401000	1	4370500	4668300	9230200	8703900	11418000	1	1	1	14153000	12063000	7559800	9475400	10227000	10697000	3	Q86VP6;Q86VP6-2;H0YH27	Q86VP6;Q86VP6-2	Cullin-associated NEDD8-dissociated protein 1	CAND1	3	0.957864	2.09427	0.457375	2.18639	0.933169	0.036298	0.00359012
1456700000	1787500000	2854700000	3052000000	1971000000	1750600000	1122900000	1018900000	1145600000	1249700000	2034700000	1801700000	555150000	528260000	1118800000	813180000	574310000	574410000	8	Q9NXV2;H3BSS5	Q9NXV2	BTB/POZ domain-containing protein KCTD5	KCTD5	2	0.650495	0.323489	2.01087	0.497296	0.0388583	0.00490045	0.000432116
3153600	10620000	9227000	9898700	8593100	7564500	35121000	29234000	22149000	9441300	1	1	21599000	22067000	22844000	20023000	26431000	18555000	2	Q86X55;Q86X55-1;Q86X55-2;K7EQA8;K7EPK1;K7EK20	Q86X55;Q86X55-1;Q86X55-2;K7EQA8;K7EPK1;K7EK20	Histone-arginine methyltransferase CARM1	CARM1	6	1.9558	2.68095	0.729517	1.37077	0.239172	0.364767	4.72804e-06
47608000	35604000	138350000	121650000	70883000	35938000	46155000	34240000	26866000	1	76590000	11079000	1	12716000	14482000	13551000	12598000	11062000	5	Q86XN7;A6NJ97;Q5JS34;Q5JS36	Q86XN7;A6NJ97;Q5JS34	Proline and serine-rich protein 1	PROSER1;C13orf23	4	0.433146	0.143121	3.02644	0.330421	0.0748051	0.0829092	0.00583172
7823500	10014000	10287000	11073000	1	7239000	1	1	1	1	1	1	1	1	1	1	1	1	3	Q86YM7;Q86YM7-2;Q86YM7-3;Q9NSC5;Q9NSC5-2;Q9NSC5-5;M0R2U7;Q86YM6;M0QZN1;Q9NSC5-3;Q9NSC5-4;M0R2T8	Q86YM7;Q86YM7-2;Q86YM7-3	Homer protein homolog 1	HOMER1	12	1.29209e-07	1.29209e-07	1	1	0.000901355	#DIV/0!	0.000901355
1	1	1	1	5336100	1	3238400	5209300	5105900	1	7951200	8257700	1	1	1	1	6229300	1	2	P28482;P28482-2	P28482;P28482-2	Mitogen-activated protein kinase 1	MAPK1	2	5.57757	1.16739	4.77782	0.2093	0.024624	0.0370148	0.915439
243200000	200630000	243730000	251670000	154010000	165410000	200620000	168420000	153180000	194110000	265540000	162480000	96744000	89378000	160040000	181890000	186850000	140550000	14	Q8IX12;Q8IX12-2;F5H2E6;F5H1H2;F5H3E1;H0YFJ7;F5H7M9	Q8IX12;Q8IX12-2;F5H2E6;F5H1H2;F5H3E1	Cell division cycle and apoptosis regulator protein 1	CCAR1	7	0.909188	0.679658	1.33771	0.747544	0.449792	0.071765	0.0205283
4724500	4672000	3800300	5232000	4505300	4501100	4841100	4145600	4169900	1	1	1	4983100	1	1	5770500	4808900	1	2	Q8IXM3	Q8IXM3	39S ribosomal protein L41, mitochondrial	MRPL41	1	0.479552	0.567246	0.845404	1.18287	0.0392432	0.798332	0.125255
12505000	14154000	7099600	7655100	10690000	9677300	8752100	10382000	19768000	20540000	40661000	37816000	5962300	4670900	11337000	12708000	10031000	9005200	1	F8VS27	F8VS27	Elongation factor Ts	TSFM	1	2.23239	0.869432	2.56764	0.389463	0.0475431	0.0323751	0.444883
68034000	63649000	61323000	65713000	50322000	42620000	30033000	36815000	37229000	25685000	30026000	43206000	21834000	28555000	21802000	22376000	38034000	43101000	10	Q8N163;Q8N163-2;H0YB24;G3V119;H0YC58;E5RFJ3;E5RGU7;H0YC69;E5RHJ4	Q8N163;Q8N163-2;H0YB24;G3V119	DBIRD complex subunit KIAA1967	KIAA1967	9	0.577243	0.499635	1.15533	0.865553	0.000444473	0.34461	0.000354871
2475900	1	1	1	1	2754100	3138100	3611400	3338900	3253500	1	2978000	6431800	3898000	3658700	4189500	3645100	3410700	2	Q8N1F7;H3BVG0;Q8N1F7-2;H3BM93;H3BRI8;H3BV11	Q8N1F7;H3BVG0;Q8N1F7-2;H3BM93;H3BRI8;H3BV11	Nuclear pore complex protein Nup93	NUP93	6	3.12044	4.82481	0.646748	1.5462	0.0393293	0.0648804	0.0009144
14577000	8792900	1	7803600	10708000	7471600	1	9178400	9847200	1	1	1	15389000	17550000	11471000	10974000	10175000	9746400	2	Q8N1G4	Q8N1G4	Leucine-rich repeat-containing protein 47	LRRC47	1	0.3855	1.52585	0.252646	3.95811	0.101768	0.00283031	0.0953026
16659000	13170000	20087000	19153000	14341000	15821000	1	13211000	25370000	18110000	36897000	1	1	1	1	1	1	1	1	P01621	P01621	Ig kappa chain V-III region NG9		1	0.943133	6.0465e-08	1.5598e+07	6.41108e-08	0.878777	0.0247602	3.34373e-08
47809000	60746000	47819000	66300000	34056000	34072000	20317000	18128000	22931000	22129000	27364000	15938000	21125000	10487000	20944000	15291000	18140000	12884000	9	Q8N3C0;Q8N3C0-4;E5RFZ0;Q8N3C0-3;J3KNJ4	Q8N3C0;Q8N3C0-4	Activating signal cointegrator 1 complex subunit 3	ASCC3	5	0.43606	0.339994	1.28255	0.779697	0.000701133	0.0821771	0.00022784
1	1	1	1	1	1	198620000	225660000	202530000	302170000	445460000	386410000	276930000	1	28943000	1	277570000	1	1	Q9ULJ3;Q9ULJ3-2	Q9ULJ3;Q9ULJ3-2	Zinc finger protein 295	ZNF295	2	293475000	9.72405e+07	3.01803	0.331342	4.00548e-05	0.0200871	0.11944
172060000	148470000	153400000	189640000	84890000	58674000	53221000	52236000	62695000	59275000	63566000	55070000	11814000	12369000	37024000	43519000	51885000	31569000	11	Q8N5C8;Q8N5C8-2;F6SS63	Q8N5C8;Q8N5C8-2;F6SS63	TGF-beta-activated kinase 1 and MAP3K7-binding protein 3	TAB3	3	0.428755	0.233146	1.839	0.543774	0.00449835	0.00367	0.000863718
77546000	74665000	77907000	63931000	54940000	59111000	74719000	87219000	80917000	90589000	126430000	128260000	42985000	48520000	75670000	68126000	75407000	90452000	5	Q8N5F7;Q5M9Q1	Q8N5F7;Q5M9Q1	NF-kappa-B-activating protein;NKAP-like protein	NKAP;NKAPL	2	1.44115	0.982994	1.46608	0.682089	0.0160432	0.0269668	0.893168
1388700000	1316500000	1598600000	1769400000	1023700000	992340000	872440000	970760000	1041700000	1073900000	1331900000	1291300000	574210000	354950000	778190000	697420000	726130000	730680000	11	Q8N5Z5;Q8N5Z5-2;H7C323	Q8N5Z5;Q8N5Z5-2	BTB/POZ domain-containing protein KCTD17	KCTD17	3	0.813673	0.477372	1.70448	0.586688	0.115583	0.000921665	0.00054555
1287900	1625500	3415500	2859700	3355600	3512900	1	1	1	1	7304800	1	1	2053700	4463500	1	1	1	1	Q8N9Q2	Q8N9Q2	Protein SREK1IP1	SREK1IP1	1	0.454927	0.405877	1.12085	0.89218	0.281411	0.928779	0.0919529
832570000	894500000	830120000	826090000	747510000	690220000	644980000	710600000	745090000	670380000	687940000	702490000	711260000	674570000	708160000	700170000	694760000	656210000	24	Q8NC51;Q8NC51-3	Q8NC51;Q8NC51-3	Plasminogen activator inhibitor 1 RNA-binding protein	SERBP1	2	0.863197	0.859805	1.00394	0.996071	0.00734406	0.872656	0.00447244
44767000	47757000	39102000	41053000	42541000	41883000	35337000	43714000	38183000	39608000	54879000	51214000	29355000	32410000	45355000	44622000	41661000	42056000	23	Q8NC51-2;Q8NC51-4	Q8NC51-2;Q8NC51-4			2	1.02268	0.915816	1.11669	0.895503	0.780101	0.298443	0.257362
42565000	44942000	37840000	35713000	25600000	32003000	59902000	67864000	72839000	71987000	92776000	93620000	29479000	31755000	53993000	55806000	66813000	65400000	6	Q8TA86;C9J6V2	Q8TA86	Retinitis pigmentosa 9 protein	RP9	2	2.09907	1.38682	1.51358	0.660684	8.28618e-05	0.0136142	0.080021
23665000	25854000	39765000	45327000	32166000	27956000	4349200	3443600	1	5976400	3514800	1	4598900	1631700	3841900	1911000	1	2778200	1	Q8NFU7	Q8NFU7	Methylcytosine dioxygenase TET1	TET1	1	0.0887574	0.0758048	1.17087	0.854067	9.38231e-06	0.73182	6.92418e-06
119850000	86804000	192340000	163160000	89811000	94612000	5999000	16673000	6475300	16793000	11700000	8778900	2482900	3043000	9618200	12783000	10095000	6722200	11	Q8NHQ1;Q8NHQ1-4;Q8NHQ1-5;Q8NHQ1-2;B7Z2D2;C9J966;C9J710;Q8NHQ1-3;C9JZ04	Q8NHQ1;Q8NHQ1-4;Q8NHQ1-5;Q8NHQ1-2;B7Z2D2;C9J966	Centrosomal protein of 70 kDa	CEP70	9	0.088965	0.0599326	1.48442	0.673665	9.05729e-05	0.193427	6.91138e-05
1	1	1	1	3834700	6258200	18231000	22370000	20910000	15323000	20257000	16249000	28047000	31005000	49683000	40891000	42234000	34584000	2	O43681	O43681	ATPase ASNA1	ASNA1	1	11.2297	22.436	0.500521	1.99792	7.31788e-07	0.000284844	1.08427e-06
7431800	1	10275000	7803000	1	1	1	1	1	1	1	1	1	1	1	1	1	1	1	Q8TCC3-2;Q8TCC3	Q8TCC3-2;Q8TCC3	39S ribosomal protein L30, mitochondrial	MRPL30	2	2.35204e-07	2.35204e-07	1	1	0.0534814	#DIV/0!	0.0534814
10491000	13872000	1	11360000	5665300	6361300	5423000	5828300	5819200	5810500	4855700	7629100	5059700	4387900	4433000	6011600	5199300	1	2	Q8TDN6	Q8TDN6	Ribosome biogenesis protein BRX1 homolog	BRIX1	1	0.740651	0.525481	1.40947	0.709485	0.342025	0.101634	0.118654
94695000	90430000	99931000	107160000	58918000	62003000	38182000	40134000	43529000	48234000	36771000	50166000	13637000	14057000	22935000	21977000	32265000	27722000	12	Q8TDY2;Q8TDY2-2;H0YC30;H0YC28	Q8TDY2;Q8TDY2-2	RB1-inducible coiled-coil protein 1	RB1CC1	4	0.500872	0.258397	1.93838	0.515894	0.000544121	0.000249157	2.86788e-05
1	1	1	1	1	1	12572000	11634000	13322000	14490000	18928000	18182000	13391000	14102000	15469000	15424000	11638000	10721000	2	Q8TE77-5	Q8TE77-5			1	1.48547e+07	13457500	1.10382	0.905944	2.84962e-07	0.364406	1.137e-08
65468000	66228000	32037000	35979000	54963000	57027000	39171000	41324000	77884000	87236000	100610000	995070000	33515000	1	75734000	86445000	64516000	71260000	2	Q8TF72	Q8TF72	Protein Shroom3	SHROOM3	1	4.30313	1.06342	4.0465	0.247127	0.29344	0.303627	0.825177
2837800	2871700	2026500	2011900	3030100	2556000	3759300	4727700	5067000	5131400	4154800	4874400	5403700	4919800	5820300	5112500	5320200	5401900	3	Q8WU90;B4DMW2;F8WB26	Q8WU90	Zinc finger CCCH domain-containing protein 15	ZC3H15	3	1.8074	2.08546	0.866666	1.15385	2.98291e-05	0.0194797	1.80098e-07
17282000	23201000	15479000	23421000	15322000	15287000	14917000	16764000	16717000	13230000	1	14450000	15738000	13384000	15014000	12704000	13056000	13758000	4	Q8WUA2	Q8WUA2	Peptidyl-prolyl cis-trans isomerase-like 4	PPIL4	1	0.691668	0.760546	0.909437	1.09958	0.0937035	0.642849	0.0256001
1	1	24498000	1	1	14579000	26129000	19156000	26751000	25691000	64120000	35515000	1	22422000	1	28003000	28469000	22074000	3	Q8WVK2;B8ZZ98	Q8WVK2;B8ZZ98	U4/U6.U5 small nuclear ribonucleoprotein 27 kDa protein	SNRNP27	2	5.05059	2.58382	1.9547	0.511588	0.00740827	0.0895754	0.16787
1	1	1	1	1	1	9912700	10338000	8043100	9669900	9188500	5658100	14575000	18038000	9910200	9592400	11934000	12748000	2	P40222	P40222	Alpha-taxilin	TXLNA	1	8.80172e+06	12799600	0.687656	1.45422	2.04014e-07	0.0216574	1.71636e-06
6389800000	6416100000	7268100000	7051000000	4948900000	4926000000	3582800000	3177600000	3671000000	3856800000	3562700000	3717200000	1867800000	2004200000	3027300000	2684100000	2670600000	2672100000	31	Q8WWY3;E7EVX8;E7ESA8;Q8WWY3-2;Q8WWY3-3;E7EN72;E7ESX0;E7EU94	Q8WWY3;E7EVX8;E7ESA8;Q8WWY3-2;Q8WWY3-3	U4/U6 small nuclear ribonucleoprotein Prp31	PRPF31	8	0.582923	0.403409	1.44499	0.692045	0.000121093	0.000319288	1.02326e-05
8391800	8324600	9689400	9098800	7171800	7161700	6601200	1	1	1	5251000	6194500	6383900	4919000	5472500	1	6688800	6857300	2	Q8WXD5	Q8WXD5	Gem-associated protein 6	GEMIN6	1	0.362107	0.6084	0.595178	1.68017	0.00388049	0.261542	0.0167108
13097000	9487000	4968700	5107200	5481100	1	1	1	1	1	1	1	1	1	1	1	1	1	1	Q8WXE9-3;Q8WXE9	Q8WXE9-3;Q8WXE9	Stonin-2	STON2	2	1.57311e-07	1.57311e-07	1	1	0.00588513	#DIV/0!	0.00588513
318030000	331120000	355710000	323720000	282730000	285970000	140370000	126210000	117880000	118770000	123740000	157370000	84649000	97853000	108510000	85239000	101840000	111390000	19	Q8WXF1;Q8WXF1-2;REV__Q96JN2-4;REV__Q96JN2;REV__H7C4R2;REV__Q96JN2-2;REV__H0Y876	Q8WXF1;Q8WXF1-2	Paraspeckle component 1	PSPC1	7	0.413402	0.310698	1.33056	0.751563	5.58229e-08	0.00193785	6.86244e-09
126260000	111500000	144050000	114270000	93253000	106080000	51978000	54327000	73514000	6568400	125090000	102790000	77773000	50804000	51402000	47149000	62861000	55879000	11	Q92499	Q92499	ATP-dependent RNA helicase DDX1	DDX1	1	0.595714	0.497356	1.19776	0.834891	0.0295658	0.532822	4.39479e-05
20650000	33472000	10334000	24841000	10485000	11095000	21298000	16394000	15166000	11923000	16396000	7572200	8807200	9829600	12560000	12073000	6931200	13723000	1	Q92522	Q92522	Histone H1x	H1FX	1	0.800429	0.576531	1.38835	0.720277	0.414396	0.0853954	0.0809807
1	1	71554000	76435000	1	1	1	1	147390000	1	1	1	223660000	1	218910000	1	1	1	7	Q92526;Q92526-3;Q92526-2	Q92526;Q92526-3;Q92526-2	T-complex protein 1 subunit zeta-2	CCT6B	3	0.995952	2.99056	0.333032	3.00271	0.997331	0.372776	0.34184
1	1	1	1	1	1	1	1	1	1	1	1	1	1	1	1	1	1	1	Q92541	Q92541	RNA polymerase-associated protein RTF1 homolog	RTF1	1	1	1	1	1	#DIV/0!	#DIV/0!	#DIV/0!
1	5815000	1	1099300	1	1	1	11907000	1	1	1	29206000	5052300	1	1	8366500	9268800	8760600	2	Q92616	Q92616	Translational activator GCN1	GCN1L1	1	5.94608	4.54828	1.30732	0.764921	0.277867	0.762416	0.0685279
101360000	102370000	127350000	131810000	58079000	61026000	20301000	21355000	24086000	18562000	6737800	11697000	12184000	13524000	17772000	12302000	13874000	15541000	13	Q92620;B4DVG8;J3KRT1;H3BQT9;H3BV01;J3KTG2;H3BMS7;J3KSA8	Q92620;B4DVG8	Pre-mRNA-splicing factor ATP-dependent RNA helicase PRP16	DHX38	8	0.176529	0.146388	1.2059	0.829258	0.000121368	0.324342	7.77599e-05
1	1	1	5268000	3999200	4105000	4240700	1	3096600	1	1	3761800	1	1	4060400	1	4099900	1	2	Q92665	Q92665	28S ribosomal protein S31, mitochondrial	MRPS31	1	0.830013	0.610244	1.36013	0.735222	0.779379	0.692388	0.52812
1	1	1	1	1	6604600	7933400	5954700	7510100	1	1	1	12078000	12946000	8680700	9183100	10141000	10628000	2	P30520	P30520	Adenylosuccinate synthetase isozyme 2	ADSS	1	3.23989	9.63824	0.33615	2.97487	0.236205	0.00243749	2.39791e-05
52191000	49976000	87001000	55865000	36775000	47584000	13924000	15307000	19346000	20320000	11652000	24059000	26281000	13144000	11582000	11227000	17644000	12619000	5	Q92747;B4DLQ7;E9PF58	Q92747;B4DLQ7;E9PF58	Actin-related protein 2/3 complex subunit 1A	ARPC1A	3	0.317579	0.280811	1.13093	0.884225	0.000395501	0.519607	0.000308303
14722000	14058000	16707000	15858000	20772000	15941000	19579000	23216000	13644000	14740000	13534000	16382000	22280000	20603000	18741000	19580000	20047000	22993000	3	Q92900;Q92900-2	Q92900;Q92900-2	Regulator of nonsense transcripts 1	UPF1	2	1.03097	1.26705	0.813681	1.22898	0.789195	0.0471289	0.00397042
138630000	137570000	82782000	52639000	185140000	205320000	252630000	225720000	214820000	211040000	190360000	130100000	374970000	400910000	253010000	284530000	285300000	285960000	17	Q92945;M0R0I5;M0QYH3;M0R3J3;M0QXW7	Q92945;M0R0I5	Far upstream element-binding protein 2	KHSRP	5	1.52687	2.34974	0.649803	1.53893	0.0367019	0.00392305	0.000335457
5262600	5816000	1	2205300	8821800	7004300	22288000	23728000	18607000	20405000	20265000	25466000	22213000	27434000	21977000	25392000	26875000	29286000	3	P46109	P46109	Crk-like protein	CRKL	1	4.49189	5.26201	0.853646	1.17145	1.41346e-06	0.0398295	3.99546e-07
9670500	11384000	13369000	13404000	10459000	13683000	3777300	1	1	1	1	4212900	1	1	1	1	1	1	2	Q969L4	Q969L4	U7 snRNA-associated Sm-like protein LSm10	LSM10	1	0.111022	8.33686e-08	1.3317e+06	7.5092e-07	2.09482e-06	0.145731	1.0186e-08
5975600	5282900	8473900	6773400	5800500	5101100	8368600	12242000	9135700	1	5462300	8627000	8540600	6541100	11477000	8139100	25053000	15324000	5	Q969Q0	Q969Q0	60S ribosomal protein L36a-like	RPL36AL	1	1.17184	2.00695	0.583892	1.71264	0.560769	0.1443	0.052546
7213100000	6797700000	2086800000	2707900000	145410000	166820000	1324200000	1304600000	745890000	727690000	1465500000	1372000000	188450000	200870000	222090000	191630000	543670000	494560000	11	P62805	P62805	Histone H4	HIST1H4A	1	0.363008	0.0963122	3.76907	0.265317	0.145549	0.000215978	0.0483005
25205000	25486000	6317000	1	60659000	65321000	65904000	72803000	52262000	52383000	9319500	6472100	143580000	150420000	80283000	82841000	88773000	91816000	3	P63313	P63313	Thymosin beta-10	TMSB10	1	1.41618	3.485	0.406364	2.46085	0.447894	0.00472369	0.00126943
29658000	22521000	19401000	15406000	49039000	61033000	42740000	34564000	35271000	33848000	31112000	43477000	110630000	94216000	41703000	65477000	53214000	54835000	6	Q96AG4	Q96AG4	Leucine-rich repeat-containing protein 59	LRRC59	1	1.12156	2.13173	0.526125	1.90069	0.616177	0.0136181	0.0183011
248220000	245930000	354930000	356560000	190800000	231560000	158910000	131390000	147760000	168220000	201020000	189390000	58737000	64155000	135240000	102330000	111120000	113930000	21	Q96AV8;Q96AV8-3;Q96AV8-2;F8VSE7;H0YIF4;H0YHW2;F8VXV5	Q96AV8;Q96AV8-3;Q96AV8-2;F8VSE7	Transcription factor E2F7	E2F7	7	0.612217	0.359651	1.70225	0.587456	0.00557068	0.00174573	0.000202288
106790000	52623000	93162000	90131000	176130000	175960000	288430000	231020000	234030000	216890000	272720000	205380000	317870000	330980000	293440000	297090000	307810000	291120000	11	Q15365	Q15365	Poly(rC)-binding protein 1	PCBP1	1	2.08474	2.64583	0.787936	1.26914	0.000423233	0.00129156	4.53282e-06
26696000	27184000	27010000	32465000	17841000	21489000	23405000	24811000	30080000	38046000	32097000	27455000	22827000	20343000	23662000	25631000	20495000	21072000	6	Q96B26;H7C581	Q96B26	Exosome complex component RRP43	EXOSC8	2	1.15201	0.87782	1.31235	0.761993	0.228685	0.0139323	0.196739
1	1	1	1	1	1	4732100	5694400	4278100	4668700	1	1	9944700	6150300	3989300	4672400	4440300	5336600	2	Q96C01;E7EQY1;C9J2Y4	Q96C01;E7EQY1;C9J2Y4	Protein FAM136A	FAM136A	3	3.22888e+06	5755600	0.560999	1.78254	0.0110845	0.0948224	7.36669e-05
3691800	3305900	2462500	3540000	3630300	3247800	4453900	5444500	3852700	3452200	6380600	5739200	3516300	3765000	5399500	5730000	6848500	7152700	2	Q96CS3	Q96CS3	FAS-associated factor 2	FAF2	1	1.47513	1.63052	0.904699	1.10534	0.0107636	0.522274	0.0089737
80141000	77869000	64803000	97027000	69938000	69562000	101170000	104790000	97488000	111610000	63988000	71091000	105090000	95246000	107330000	110440000	101770000	93151000	11	Q96CT7;M0R2F5	Q96CT7	Coiled-coil domain-containing protein 124	CCDC124	2	1.19767	1.33458	0.897411	1.11432	0.131623	0.240506	0.000863408
1	2400600	1	1	3189300	1	3926500	3985500	3970100	3541100	2499800	1	9653600	4672300	3950800	4236200	4249800	4374100	1	Q96CX2	Q96CX2	BTB/POZ domain-containing protein KCTD12	KCTD12	1	3.20632	5.57019	0.575621	1.73725	0.0409497	0.0738034	0.00274422
25957000	21802000	12630000	14122000	11139000	13590000	24268000	25039000	23651000	30924000	31645000	31365000	16696000	22387000	23307000	29587000	26599000	30968000	3	Q96DG6	Q96DG6	Carboxymethylenebutenolidase homolog	CMBL	1	1.6817	1.50689	1.11601	0.896053	0.00293057	0.302692	0.026731
3269500	8853200	5570400	12065000	1	8096500	1	1	1	3376800	1	1	17631000	1845800	2958700	184290000	2977800	2893400	4	Q96DV4;B3KN96	Q96DV4	39S ribosomal protein L38, mitochondrial	MRPL38	2	0.0892046	5.61614	0.0158836	62.9579	0.01091	0.270244	0.353373
6756600	6994800	5657100	6851700	7090800	5768900	4507000	3318700	3626300	3073600	1	3428700	11118000	9083400	8208400	6403300	9063500	5325800	2	Q96EL3	Q96EL3	39S ribosomal protein L53, mitochondrial	MRPL53	1	0.458956	1.25773	0.364907	2.74042	0.000420553	0.000596252	0.08714
1	1	3295200	1	1	1	3169300	2502100	2579800	3061600	1	1	1	1	1	1	1	3088800	2	Q96EY7;Q96EY7-2	Q96EY7;Q96EY7-2	Pentatricopeptide repeat-containing protein 3, mitochondrial	PTCD3	2	3.43311	0.937364	3.66252	0.273036	0.133212	0.115352	0.96445
39510000	42191000	54571000	54343000	16967000	18427000	15193000	14708000	12547000	11179000	13533000	7875600	9625700	5671100	1	25486000	1	1	7	Q96GA3	Q96GA3	Protein LTV1 homolog	LTV1	1	0.332003	0.180448	1.83988	0.543513	0.00443374	0.205609	0.00297994
1	2589400	1721400	1154600	1582000	1419000	15812000	17902000	19670000	18858000	26590000	26719000	10290000	9969500	18958000	19654000	17937000	19267000	2	Q8N490-2	Q8N490-2			1	14.8293	11.3479	1.3068	0.765231	1.35659e-06	0.0945478	1.72302e-05
818760000	806150000	938950000	968920000	601250000	579900000	206540000	170850000	209580000	137210000	184260000	200080000	105650000	108830000	135490000	119030000	159060000	142180000	18	Q96HS1;Q96HS1-2;F5GXG4	Q96HS1;Q96HS1-2	Serine/threonine-protein phosphatase PGAM5, mitochondrial	PGAM5	3	0.235158	0.163397	1.43919	0.694836	4.87695e-06	0.00250242	2.05608e-06
13843000	11562000	9135000	13463000	17097000	23387000	22288000	23845000	23241000	21386000	19714000	26143000	40422000	28797000	26124000	27060000	23277000	36789000	4	Q96I24;Q96I24-2	Q96I24;Q96I24-2	Far upstream element-binding protein 3	FUBP3	2	1.54392	2.0621	0.748713	1.33562	0.00480584	0.0240393	0.000984412
95262000	106400000	108530000	117320000	79275000	74844000	54246000	67871000	73937000	73455000	52440000	74288000	34117000	28417000	44186000	37543000	32202000	45387000	6	Q96I25;Q5W012;Q5W010;Q5W011;H0Y6J6	Q96I25;Q5W012;Q5W010;Q5W011	Splicing factor 45	RBM17	5	0.681252	0.381431	1.78604	0.559897	0.00333193	0.000161227	1.12961e-05
1703000	2097000	1	1385300	1	3520500	30067000	28037000	42399000	37124000	71179000	64526000	29791000	32000000	26416000	40172000	45109000	40596000	2	Q96IX5	Q96IX5	Up-regulated during skeletal muscle growth protein 5	USMG5	1	31.3965	24.591	1.27675	0.783238	0.000142927	0.244332	5.21784e-07
13332000	11987000	11750000	11994000	8714200	1	1	1	1	1	1	1	1	1	1	1	1	1	1	Q96IZ7;Q96IZ7-2	Q96IZ7;Q96IZ7-2	Serine/Arginine-related protein 53	RSRC1	2	1.03847e-07	1.03847e-07	1	1	0.000771732	#DIV/0!	0.000771732
25183000	27404000	23039000	22120000	10213000	10689000	10308000	9729300	13756000	8770600	7666500	5081500	2838600	1	6528300	6513100	4860400	1	5	P83369	P83369	U7 snRNA-associated Sm-like protein LSm11	LSM11	1	0.466185	0.174806	2.66687	0.374972	0.0089388	0.00691298	0.000556671
54882000	51249000	68984000	36500000	35338000	34294000	26396000	23000000	27089000	1	1	28218000	22789000	1	22121000	1	20417000	20135000	1	Q96LZ3	Q96LZ3	Calcineurin subunit B type 2	PPP3R2	1	0.372281	0.303868	1.22514	0.816233	0.0041253	0.66423	0.00116158
43532000	43503000	32706000	38883000	21547000	24030000	15784000	18397000	11066000	8115900	32862000	22381000	17933000	11491000	12797000	16941000	17564000	20813000	10	Q96N67;Q96N67-6;Q96N67-2;Q96N67-5;Q96N67-3;Q96N67-4;H0Y7L2;Q96NI0;Q96HP0;Q8NF50;Q8NF50-2;Q8NF50-3;Q8NF50-4;A2A369;C9IZV6;K7ESB7;K7EP51	Q96N67;Q96N67-6;Q96N67-2;Q96N67-5;Q96N67-3;Q96N67-4;H0Y7L2	Dedicator of cytokinesis protein 7	DOCK7	17	0.531858	0.477662	1.11346	0.8981	0.0135814	0.644602	0.00165411
10700000	12728000	11853000	11921000	10403000	10410000	11652000	12554000	20293000	14079000	20048000	10255000	11022000	14872000	11811000	10378000	13717000	20327000	3	Q96SB4-3;H3BLV9;Q96SB4;B4DS61;Q5R363;P78362-2;P78362;E7ETV6;Q9UPE1;Q9UPE1-4;A8MPY5;Q9UPE1-3;A8MPP7;Q9UPE1-2;H7C5L6;H7C521;H7C2I2	Q96SB4-3;H3BLV9;Q96SB4;B4DS61;Q5R363	SRSF protein kinase 1	SRPK1	17	1.30679	1.20748	1.08224	0.924011	0.0839465	0.637408	0.159255
617950000	623170000	857710000	905010000	465110000	509030000	324940000	335250000	384720000	327110000	409660000	373590000	188240000	149570000	229620000	246240000	218270000	232650000	11	Q99417	Q99417	C-Myc-binding protein	MYCBP	1	0.5418	0.317898	1.70432	0.586743	0.00233959	2.76403e-05	0.000128843
4871300	4331700	1995600	2241400	8421700	6704900	7247400	11025000	5913700	6490800	5249500	5993300	11100000	9271300	10570000	6890100	6414200	6267500	1	Q99436	Q99436	Proteasome subunit beta type-7	PSMB7	1	1.46744	1.76826	0.829878	1.205	0.125469	0.270872	0.0221635
58934000	43710000	71548000	58007000	62434000	26254000	13903000	15953000	22415000	18547000	23757000	22542000	15094000	11941000	14512000	10973000	18717000	19383000	7	Q99459	Q99459	Cell division cycle 5-like protein	CDC5L	1	0.364979	0.282405	1.2924	0.773756	0.000523417	0.067716	0.000193987
206040000	140720000	204380000	242070000	104440000	126790000	115810000	151520000	123270000	109450000	154010000	113420000	137930000	90256000	139650000	140250000	99666000	173390000	14	Q99460;Q99460-2;C9J9M4;H7C378;H7BZR6;F8WCE3	Q99460;Q99460-2	26S proteasome non-ATPase regulatory subunit 1	PSMD1	6	0.74917	0.762506	0.98251	1.0178	0.0991311	0.881051	0.141314
3018800000	3097100000	2948200000	2859000000	1974600000	2044200000	1496800000	1475500000	1647100000	1468500000	1669300000	1721900000	909170000	935430000	1242100000	1220600000	1144000000	1188500000	39	Q99613;H3BRV0;B5ME19;H3BPE4;H3BPE3;H3BTY8	Q99613;H3BRV0;B5ME19	Eukaryotic translation initiation factor 3 subunit C	EIF3C;EIF3CL	6	0.594603	0.4165	1.42762	0.700467	0.00048508	9.20465e-05	2.99987e-05
22638000	22916000	21145000	15101000	22882000	24812000	47234000	52920000	57279000	48859000	61586000	58109000	55321000	45753000	58875000	51796000	73995000	78415000	7	Q99615;Q99615-2;K7EIH8;K7EPP7;K7ESP1;K7ER44;K7EJV7;K7EN19;K7EJL5;K7ELJ8;K7EK03;K7EJE9	Q99615;Q99615-2;K7EIH8;K7EPP7;K7ESP1;K7ER44;K7EJV7;K7EN19;K7EJL5	DnaJ homolog subfamily C member 7	DNAJC7	12	2.51739	2.81214	0.895187	1.11708	2.44336e-07	0.292544	2.89194e-05
28136000	35844000	30125000	27289000	55831000	55683000	73065000	67132000	63748000	64702000	63855000	51703000	126370000	151820000	66635000	59187000	81884000	73031000	7	Q99714;Q99714-2;Q5H928	Q99714;Q99714-2;Q5H928	3-hydroxyacyl-CoA dehydrogenase type-2	HSD17B10	3	1.6496	2.39978	0.687397	1.45476	0.00223429	0.0891382	0.00722581
1368400000	1304600000	1399200000	1485200000	1187700000	1220100000	1365700000	1234400000	1175300000	1185000000	1152500000	1208600000	1179200000	1338800000	1267800000	1301600000	1199800000	1222800000	32	Q99832;Q99832-3;Q99832-4;F5GZK5;B7Z1C9;Q99832-2;F8WAM2;F8WBP8	Q99832;Q99832-3;Q99832-4;F5GZK5;B7Z1C9;Q99832-2	T-complex protein 1 subunit eta	CCT7	8	0.919186	0.942851	0.9749	1.02575	0.082339	0.452537	0.178359
7980700	2165100	1489400	1321500	1067300	1	1	627520	919670	829180	1	1747300	1	1	1	1	1	1	10	Q99880;Q96A08	Q99880;Q96A08	Histone H2B type 1-L;Histone H2B type 1-A	HIST1H2BL;HIST1H2BA	2	0.294044	4.27838e-07	687279	1.45501e-06	0.197464	0.027908	0.0725849
1	1	1	1	1	1	1	1	1	1	1	1	1	1	1	1	1	1	1	Q99943	Q99943	1-acyl-sn-glycerol-3-phosphate acyltransferase alpha	AGPAT1	1	1	1	1	1	#DIV/0!	#DIV/0!	#DIV/0!
8966200	5591200	4642200	4367600	9858800	7691700	11450000	15387000	10478000	12378000	13412000	13233000	18667000	21390000	21242000	18198000	18125000	21053000	4	Q99961;Q99961-3;Q99961-2;M0R0I3;Q99962;F5H5J3;M0QYE0	Q99961;Q99961-3;Q99961-2;M0R0I3	Endophilin-A2	SH3GL1	7	1.85657	2.88623	0.643253	1.5546	0.000543253	2.37579e-05	5.40143e-07
2981300	1	1	1	1	3886200	4251600	3905100	1	1	1	1	1547000	4469100	4563800	1	1	4482400	2	Q9BPX3;D6RA93	Q9BPX3;D6RA93	Condensin complex subunit 3	NCAPG	2	1.18772	2.19327	0.541531	1.84662	0.853113	0.382907	0.273077
27713000	33729000	18338000	20621000	6471700	5593400	2624200	2988800	2926200	2977000	3048400	3655900	2483400	2117100	4187400	2922000	2705400	2631900	2	Q9BPX5	Q9BPX5	Actin-related protein 2/3 complex subunit 5-like protein	ARPC5L	1	0.162009	0.151576	1.06883	0.935605	0.00654649	0.556855	0.0061504
40078000	24787000	25497000	27171000	12982000	14779000	9849200	12218000	18101000	15244000	13045000	10771000	1	6924300	10518000	10287000	10333000	12549000	7	Q9BPZ2;Q99865;Q5JZB8;Q5JZB7	Q9BPZ2;Q99865;Q5JZB8;Q5JZB7	Spindlin-2B;Spindlin-2A	SPIN2B;SPIN2A	4	0.545296	0.348337	1.56543	0.638804	0.0249494	0.05735	0.00491978
6726200	6713600	17278000	14085000	5221600	5089200	3098700	3250400	1	2898400	1	1	2974700	3302800	3178100	1	1	1	5	Q9BQ39	Q9BQ39	ATP-dependent RNA helicase DDX50	DDX50	1	0.16779	0.171566	0.977992	1.0225	0.00637028	0.972681	0.00662042
4757600	4876100	2934200	1	1	1	8551600	9545100	10170000	10008000	11164000	14532000	6658600	3740700	12100000	9215900	11026000	10245000	1	Q9BQ61	Q9BQ61	Uncharacterized protein C19orf43	C19orf43	1	5.09001	4.21599	1.20731	0.828289	5.95319e-05	0.257976	0.00181316
26585000000	20552000000	31445000000	32637000000	23093000000	21731000000	11168000000	9034300000	13071000000	13221000000	14579000000	13312000000	5287600000	5541700000	8627100000	7842100000	7343100000	7046000000	18	Q9BQA1;B4DP38;H0Y711	Q9BQA1;B4DP38;H0Y711	Methylosome protein 50	WDR77	3	0.476697	0.267155	1.78435	0.560428	0.000117617	0.000217218	4.77734e-06
11422000	11023000	9707200	8981000	8848900	11296000	9404400	9992400	9718700	10080000	10331000	12346000	13097000	9772600	9297000	8371000	10073000	9518200	5	Q9BQG0-2;Q9BQG0;I3L1L3	Q9BQG0-2;Q9BQG0;I3L1L3	Myb-binding protein 1A	MYBBP1A	3	1.0097	0.981245	1.029	0.971818	0.880576	0.719004	0.819035
7379100	5312500	14937000	6835900	8091300	8024000	6091900	5560700	5099100	6239700	1	1	1	5435200	5447000	1	4629700	5969400	2	Q9BRJ2	Q9BRJ2	39S ribosomal protein L45, mitochondrial	MRPL45	1	0.454557	0.424701	1.0703	0.934319	0.0310288	0.883595	0.0215519
3070900	4080500	3431100	2927600	1	4714000	2906300	1	3995000	4697300	1	4430600	4367300	5079100	5615200	5365500	3944900	5852800	1	Q9BRP1	Q9BRP1	Programmed cell death protein 2-like	PDCD2L	1	0.879561	1.65851	0.530333	1.88561	0.74724	0.0293645	0.0210109
6715600000	7061100000	8178200000	7893200000	5509900000	5122300000	2474100000	2586500000	2832300000	2794100000	3122100000	3521100000	1165500000	1044900000	2158000000	1879000000	1912500000	1858700000	45	Q9BRS2;E9PFQ8	Q9BRS2	Serine/threonine-protein kinase RIO1	RIOK1	2	0.428114	0.247493	1.7298	0.578101	2.57603e-05	0.000503909	2.65521e-06
13008000	3477500	6899800	6985200	10291000	8827900	11881000	16200000	22050000	25680000	21659000	1	16987000	15539000	25674000	22862000	6267800	21578000	5	Q9BS26	Q9BS26	Endoplasmic reticulum resident protein 44	ERP44	1	1.96951	2.20063	0.894977	1.11735	0.0756079	0.696203	0.0100316
26190000	28181000	25304000	40366000	12405000	18856000	15623000	31987000	16920000	22340000	22685000	29293000	21245000	2817800	27771000	25265000	16660000	19141000	4	Q9BU76;Q9BU76-4;Q9BU76-3;Q9BU76-2	Q9BU76;Q9BU76-4;Q9BU76-3	Multiple myeloma tumor-associated protein 2	MMTAG2	4	0.917688	0.746188	1.22983	0.813118	0.666582	0.356543	0.252203
1127900000	1132800000	1381800000	1264700000	652990000	676200000	744330000	626730000	762120000	854230000	859530000	664570000	364310000	308170000	600640000	592400000	682510000	529460000	21	Q9BUA3;H0YGY5;H0YGK9	Q9BUA3	Uncharacterized protein C11orf84	C11orf84	3	0.723417	0.493473	1.46597	0.682142	0.0522565	0.00734697	0.00342892
9302100	8435000	11595000	1	1	11901000	1	11315000	12679000	12713000	1	1	1	1	1	1	1	1	10	Q9BUF5;K7ESM5;K7ES63;K7EL29	Q9BUF5;K7ESM5	Tubulin beta-6 chain	TUBB6	4	0.890231	1.45514e-07	6.11783e+06	1.63457e-07	0.835597	0.0498626	0.011855
17165000	23322000	21046000	20837000	8345000	9026300	7872200	8922000	7122400	6797800	1	6440900	6745300	5360000	7485000	7095700	7733400	1	3	Q9BUQ8	Q9BUQ8	Probable ATP-dependent RNA helicase DDX23	DDX23	1	0.372517	0.345087	1.07949	0.926366	0.00524588	0.800767	0.00373003
19485000	30850000	41806000	22214000	20204000	17875000	17656000	16163000	19784000	1	1	14585000	14207000	1	13523000	1	1	15753000	3	Q9BVI4;F5H303	Q9BVI4;F5H303	Nucleolar complex protein 4 homolog	NOC4L	2	0.447328	0.285258	1.56815	0.637693	0.0235018	0.420253	0.00451441
9645300	10311000	13210000	7358700	1	5554500	20568000	6080900	5318100	1	1	1	6929100	5679300	8097900	6030700	5382600	6630300	2	Q9BVP2;Q9BVP2-2	Q9BVP2;Q9BVP2-2	Guanine nucleotide-binding protein-like 3	GNL3	2	0.693736	0.840936	0.824957	1.21218	0.545073	0.737536	0.537571
71280000	58922000	101210000	125640000	68882000	66655000	48856000	62213000	71655000	60053000	57897000	58294000	34189000	50225000	48308000	55936000	51083000	41798000	6	Q9BWJ5	Q9BWJ5	Splicing factor 3B subunit 5	SF3B5	1	0.728737	0.57155	1.27502	0.784301	0.0694764	0.0143926	0.00951599
1	1	1	1	1	1	1	1	1	1	1	1	1	1	1	1	1	1	1	Q9BWM7;S4R3N9	Q9BWM7;S4R3N9	Sideroflexin-3	SFXN3	2	1	1	1	1	#DIV/0!	#DIV/0!	#DIV/0!
119750000	120110000	139370000	131730000	93452000	83547000	61308000	78263000	81474000	65111000	77542000	69106000	42368000	54406000	66807000	88063000	60059000	59421000	13	Q9BWU0;H7C256	Q9BWU0	Kanadaptin	SLC4A1AP	2	0.629113	0.539457	1.1662	0.857487	0.00118199	0.174742	0.000654275
8609500	8350400	10627000	9462000	5150100	6323500	5970900	7429500	5811700	7482600	4513400	4178300	16864000	11196000	10463000	7909900	8986500	11279000	5	Q9BXJ9;Q9BXJ9-4;Q6N069;Q6N069-2;Q6N069-3;Q6N069-4;Q6N069-5	Q9BXJ9;Q9BXJ9-4	N-alpha-acetyltransferase 15, NatA auxiliary subunit	NAA15	7	0.729278	1.37459	0.530543	1.88486	0.0539342	0.00377503	0.0732227
117040000	117460000	111440000	123880000	91300000	105130000	82872000	86607000	83313000	76678000	74577000	66396000	57021000	60097000	63084000	61061000	92075000	77952000	11	Q9BXP5;Q9BXP5-3;Q9BXP5-2;Q9BXP5-4;Q9BXP5-5;H7C3A1;Q58EX7;Q58EX7-2;REV__Q8IWL3	Q9BXP5;Q9BXP5-3;Q9BXP5-2;Q9BXP5-4;Q9BXP5-5;H7C3A1	Serrate RNA effector molecule homolog	SRRT	9	0.706106	0.617321	1.14382	0.874261	0.000166038	0.150911	0.000168212
47668000	41575000	35228000	43612000	32011000	37485000	17169000	17246000	19077000	18059000	23767000	29705000	15483000	14845000	19542000	12604000	20264000	25063000	7	Q9BY77;Q9BY77-2;F8WCX5;B4DMM2;F8WEE2;Q6R954	Q9BY77;Q9BY77-2;F8WCX5;B4DMM2	Polymerase delta-interacting protein 3	POLDIP3	6	0.526238	0.453748	1.15976	0.862249	0.000127481	0.321481	2.84943e-05
10334000	9406100	8435900	5951600	3732800	3984800	3495400	4143000	4295800	4128400	4305700	5137800	2428100	3161200	3255600	3166200	3131400	2982900	2	Q9BYE7;Q9BYE7-3	Q9BYE7;Q9BYE7-3	Polycomb group RING finger protein 6	PCGF6	2	0.609535	0.433154	1.4072	0.71063	0.0425351	0.00057544	0.00664304
86341000	74147000	59289000	143590000	17762000	23905000	17708000	14531000	16317000	15320000	18462000	13499000	5804100	1	10941000	7854900	9418300	12143000	9	Q5JUX0	Q5JUX0	Spindlin-3	SPIN3	1	0.236615	0.113969	2.07613	0.481665	0.0210031	0.0016998	0.0101051
24936000	8520200	15881000	13949000	24343000	13856000	19238000	27168000	20911000	22123000	1	14724000	25146000	19006000	16398000	15441000	21270000	15139000	2	Q9BZE1;S4R369;A6NHR2	Q9BZE1;S4R369;A6NHR2	39S ribosomal protein L37, mitochondrial	MRPL37	3	1.0264	1.10755	0.926726	1.07907	0.925627	0.748468	0.56885
10291000	5516500	5904000	5984100	5752000	5696000	1	1	1	1	1	1	1	1	1	1	1	1	3	Q9BZI7;Q9BZI7-2	Q9BZI7;Q9BZI7-2	Regulator of nonsense transcripts 3B	UPF3B	2	1.53282e-07	1.53282e-07	1	1	6.05496e-06	#DIV/0!	6.05496e-06
1	5223700	1	1	7044500	9213100	16446000	10957000	8092100	9682600	1	6770700	42834000	41022000	13544000	13259000	14643000	16024000	4	Q00688	Q00688	Peptidyl-prolyl cis-trans isomerase FKBP3	FKBP3	1	2.41831	6.57902	0.367579	2.72051	0.0970086	0.0379294	0.0081144
8655900	10038000	11355000	12854000	9901100	5626300	1	10736000	1	1	1	1	10087000	11501000	1	1	1	12712000	1	Q9C0C9	Q9C0C9	Ubiquitin-conjugating enzyme E2 O	UBE2O	1	0.18374	0.587024	0.313003	3.19486	0.00310912	0.23935	0.177059
17831000	19406000	19956000	15716000	9591700	9704200	7179400	5523700	8687700	5456500	9259200	8302900	8300900	7099700	7212800	7753100	4635600	4312400	3	Q9H0A0;E7ESU4;E9PMU0;E9PJN6	Q9H0A0;E7ESU4	N-acetyltransferase 10	NAT10	4	0.481638	0.426382	1.12959	0.885274	0.00274838	0.393482	0.00143235
1	1	1	1	1	4968100	14568000	12505000	9013100	1	8316900	7729000	9305600	13693000	9652700	14105000	14171000	14392000	2	Q9H0C8;H7C2I8	Q9H0C8;H7C2I8	Integrin-linked kinase-associated serine/threonine phosphatase 2C	ILKAP	2	10.4933	15.1606	0.692147	1.44478	0.00519095	0.119358	3.55624e-06
11034000	10786000	11686000	10490000	10313000	1	6733800	7670400	7127500	8291600	1	1	1	8760900	1	1	1	1	1	Q9H0U6	Q9H0U6	39S ribosomal protein L18, mitochondrial	MRPL18	1	0.549141	0.161316	3.40413	0.29376	0.121938	0.134544	0.00868418
5316300	8899500	16994000	10666000	5045300	1	6770500	5115300	6744700	5744700	5120900	5158100	4132800	4021900	3915100	4363700	4602500	4096900	3	Q9H1I8;Q9H1I8-3;Q9H1I8-2;B1AH60;B1AH59	Q9H1I8;Q9H1I8-3	Activating signal cointegrator 1 complex subunit 2	ASCC2	5	0.738563	0.535642	1.37884	0.725248	0.412812	0.000906292	0.156866
2361500	2194800	1	1990400	2382600	2443100	1	1	1	1	1	1	7333900	3577300	4077100	1	1	1	2	Q9H2G2;Q9H2G2-2	Q9H2G2;Q9H2G2-2	STE20-like serine/threonine-protein kinase	SLK	2	5.27593e-07	1.31795	4.00312e-07	2.49805e+06	0.000601593	0.0706795	0.651316
6452500	9022400	8114400	8261600	6933700	6707400	5627700	4575700	7538700	5797900	6154000	4242800	3606600	2760400	3776400	4892500	4394400	4031600	1	Q9H2W6	Q9H2W6	39S ribosomal protein L46, mitochondrial	MRPL46	1	0.745995	0.515737	1.44646	0.691341	0.013056	0.0115939	3.13177e-05
120520000	134670000	110490000	104270000	44288000	76391000	15527000	21122000	16486000	15296000	5047500	1397800	15911000	16016000	10022000	20577000	25129000	54298000	11	Q9H307;Q9H307-2;G3V579;G3V5F0	Q9H307;Q9H307-2	Pinin	PNN	4	0.126774	0.240342	0.527472	1.89583	9.56832e-05	0.149838	0.000520518
3210300000	3620900000	4294400000	4232500000	4637900000	4486800000	3676600000	3482500000	3550700000	4000700000	4190900000	4534400000	2577100000	2402700000	3653200000	3419400000	2871500000	3337100000	7	Q9H3K6;H3BVE0;H3BTW0;H3BV85;Q9H3K6-2	Q9H3K6;H3BVE0;H3BTW0;H3BV85;Q9H3K6-2	BolA-like protein 2	BOLA2;BOLA2B	5	0.957235	0.745871	1.28338	0.779193	0.547457	0.00857916	0.00662985
1	1	1	1	1	1	10827000	1	1	1	1	1	1	15686000	1	1	1	1	1	Q9H3N8;Q9H3N8-2	Q9H3N8;Q9H3N8-2	Histamine H4 receptor	HRH4	2	1.8045e+06	2.61433e+06	0.690233	1.44879	0.340893	0.80394	0.340893
2288300	2511000	2409400	2530700	3685000	3416000	5375600	5519600	5137400	4598500	6464000	6825300	3596300	3009400	5926600	4403100	5406600	5536200	2	Q9H5V9;Q9H5V9-3;Q9H5V9-2	Q9H5V9;Q9H5V9-3;Q9H5V9-2	UPF0428 protein CXorf56	CXorf56	3	2.01423	1.65544	1.21674	0.821871	4.66546e-05	0.117283	0.00633885
94978000	88518000	100920000	106190000	77724000	84089000	34033000	37168000	32233000	47634000	60250000	54775000	20508000	22238000	41964000	27297000	34999000	36081000	9	Q9H7D7;Q9H7D7-2;H0Y9R3;Q9H7D7-4;Q9H7D7-3;H0Y917;C9JCS7	Q9H7D7;Q9H7D7-2;H0Y9R3	WD repeat-containing protein 26	WDR26	7	0.481687	0.331428	1.45337	0.688056	2.29758e-05	0.0405313	6.27245e-07
3185400	3741100	1	2609900	2826200	4381700	1	2709200	2252900	2467500	1	2052700	1	3151800	1	1	2453100	1	3	Q9H840	Q9H840	Gem-associated protein 7	GEMIN7	1	0.5663	0.334735	1.69179	0.591091	0.160691	0.429099	0.0559466
16244000	13271000	27728000	27114000	11674000	10926000	7371900	11889000	1	11670000	1	13023000	7909800	5911700	7909500	6956000	21053000	11095000	3	Q9H871;Q96G75;F5H6G4;Q96G75-2;D6RIF9;D6RER3;Q9H871-2	Q9H871	Protein RMD5 homolog A	RMND5A	7	0.410949	0.56878	0.72251	1.38406	0.0244872	0.421138	0.0755473
22343000	24071000	6687200	11603000	18262000	38953000	46658000	53449000	18921000	21006000	9737800	22019000	114570000	113290000	88527000	140060000	132880000	59811000	14	Q58FF8	Q58FF8	Putative heat shock protein HSP 90-beta 2	HSP90AB2P	1	1.40905	5.32433	0.264644	3.77865	0.346686	0.0002076	4.90588e-05
1	1	1343200	1	2699600	2063000	5718200	5211900	4516800	5519800	5976900	6249200	6422000	4325500	6120300	6807000	10902000	10978000	2	Q9HAC8	Q9HAC8	Ubiquitin domain-containing protein 1	UBTD1	1	5.43627	7.4609	0.728635	1.37243	9.12383e-06	0.101356	0.000298912
10536000	13843000	7099900	1	15301000	12927000	1	1	1	1	1	1	107860000	33175000	1	1	1	23697000	3	Q9HAV7	Q9HAV7	GrpE protein homolog 1, mitochondrial	GRPEL1	1	1.00491e-07	2.75901	3.64228e-08	2.74553e+07	0.00154348	0.139465	0.334319
20550000	19934000	8519300	10032000	70977000	46446000	67066000	82647000	52407000	64299000	46175000	40013000	129790000	117900000	95052000	95675000	101860000	118180000	7	Q9HB71;Q9HB71-3;Q9HB71-2;B2ZWH1	Q9HB71;Q9HB71-3	Calcyclin-binding protein	CACYBP	4	1.99825	3.73152	0.535505	1.8674	0.0327831	0.000150128	3.97051e-05
13242000	11775000	17342000	13576000	8284700	10161000	10511000	12458000	10287000	13885000	8348100	1	6877300	8667900	11603000	9478300	1	1	5	Q9HC36;I3L0T6;I3L443	Q9HC36;I3L0T6;I3L443	RNA methyltransferase-like protein 1	RNMTL1	3	0.746015	0.492419	1.515	0.660067	0.214981	0.296258	0.0253085
51542000	57013000	27172000	41245000	38395000	36832000	27112000	24021000	39766000	34127000	90136000	106670000	5954500	5482300	18135000	16593000	10372000	14763000	2	Q86W26	Q86W26	NACHT, LRR and PYD domains-containing protein 10	NLRP10	1	1.2761	0.282712	4.51379	0.221544	0.461013	0.0172947	0.00011048
6366500	5286700	6876800	10572000	6353300	6066200	6509300	7254400	6440100	6262400	5221500	4330900	11972000	15532000	16926000	8463100	12061000	16988000	3	Q9HD33;Q9HD33-2;Q9HD33-3	Q9HD33;Q9HD33-2;Q9HD33-3	39S ribosomal protein L47, mitochondrial	MRPL47	3	0.867469	1.97349	0.439562	2.27499	0.318045	0.000359952	0.00166295
415270000	406610000	524310000	483680000	296240000	336650000	172800000	182670000	232820000	188920000	211370000	216220000	67340000	60932000	125520000	116590000	124780000	119810000	21	Q9NP73;Q9NP73-3;Q9NP73-4;D6RD27	Q9NP73;Q9NP73-3;Q9NP73-4;D6RD27	UDP-N-acetylglucosamine transferase subunit ALG13 homolog	ALG13	4	0.489207	0.249708	1.95911	0.510435	0.00017793	8.01188e-05	8.5556e-06
8031100	8319600	6724300	7183600	2349200	2586000	6040200	2212400	789750	1	1	1	1111300	3963200	1107100	1	6431600	2544900	2	Q9NPD3;E9PI41;E9PPI9	Q9NPD3;E9PI41;E9PPI9	Exosome complex component RRP41	EXOSC4	3	0.25693	0.430704	0.596536	1.67634	0.0140857	0.47316	0.0453316
1407500	1	1	1	1	1	9446500	10664000	13134000	13044000	18295000	21704000	5974500	9288800	10936000	12288000	15058000	12631000	2	Q8WWC4	Q8WWC4	Uncharacterized protein C2orf47, mitochondrial	C2orf47	1	61.3053	47.0167	1.3039	0.766928	2.54653e-05	0.176594	8.42488e-06
35495000	45561000	30210000	32732000	22582000	31801000	21021000	39855000	21175000	38239000	1	33363000	33235000	1	36694000	53312000	26928000	64733000	8	Q9NQ29;Q9NQ29-2;Q9NQ29-3;A8MYV2;B8ZZ10;B8ZZ09;F2Z322;F8WBC1	Q9NQ29;Q9NQ29-2;Q9NQ29-3;A8MYV2;B8ZZ10	Putative RNA-binding protein Luc7-like 1	LUC7L	8	0.774535	1.08328	0.714991	1.39862	0.300908	0.375296	0.781195
344560000	403920000	388860000	401130000	236860000	283980000	163440000	138890000	175470000	185650000	194580000	189680000	67739000	74831000	107130000	122710000	114850000	100400000	5	Q9NQ92;J3QRX4;J3QRX9;H9KV77;J3QRX6	Q9NQ92;J3QRX4;J3QRX9	Cooperator of PRMT5	COPR5	5	0.508767	0.285367	1.78285	0.560899	0.000193799	0.000101196	8.78252e-06
21799000	1016100	29217000	29068000	13282000	1231800	26672000	1671100	1	1	1	1	43241000	1	1	1	1	1	1	Q9NQX4	Q9NQX4	Unconventional myosin-Vc	MYO5C	1	0.296433	0.452246	0.655468	1.52563	0.132931	0.774701	0.350896
87663000	97466000	68134000	87693000	45892000	45503000	75502000	56707000	53935000	61854000	13581000	38598000	24834000	25995000	33589000	34299000	40223000	50739000	10	Q9NR30;Q9NR30-2	Q9NR30;Q9NR30-2	Nucleolar RNA helicase 2	DDX21	2	0.69429	0.484974	1.4316	0.698518	0.11373	0.147537	0.00403604
34316000	18679000	18681000	18209000	16817000	14717000	1	1	1	1	1	1	9527300	11191000	13868000	14484000	4743600	12897000	2	Q9NR45;Q5TBR1;Q5TBR0	Q9NR45;Q5TBR1;Q5TBR0	Sialic acid synthase	NANS	3	4.94157e-08	0.549427	8.99403e-08	1.11185e+07	3.63013e-05	1.96939e-05	0.0182922
22998000	25479000	35713000	16771000	22751000	30838000	27116000	24532000	35148000	34623000	48661000	43066000	27191000	29955000	31422000	27332000	85281000	41224000	3	Q9NRN7;E9PLW6;E9PNF3;B4DDW7	Q9NRN7	L-aminoadipate-semialdehyde dehydrogenase-phosphopantetheinyl transferase	AASDHPPT	4	1.37914	1.56846	0.879297	1.13727	0.0613244	0.634738	0.15869
[truncated: 80 more rows]

## Sheet: OTUB1 WT Interactome
Normalised to OTUB1 WT input (LFQ)					Control	OTUB1 WT	OTUB1 N22A	OTUB1 WT/OTUB1 N22A		OTUB1 N22A/OTUB1 WT		T-Test OTUB1 WT/N22A																			Bar Graphs
[truncated: 148 more rows]

## Sheet: OTUB1 N22A Interactome
Normalised to OTUB1 N22A input (LFQ)					Control	OTUB1 WT	OTUB1 N22A	OTUB1 WT/OTUB1 N22A		OTUB1 N22A/OTUB1 WT		T-Test OTUB1 WT/N22A																			Bar Graphs
[truncated: 319 more rows]
